# Supplementary material for: Transcriptome Analyses of Prophage in Mediating Persistent Methicillin-Resistant Staphylococcus aureus Endovascular Infection
Source: MDPI journal article supplement (doi:10.3390/genes13091527), 2022-08-25
Supplement: s1 [file s1]

Table S5. Up-regulated DEGs in 300-169 vs. 301-188::φSA169

| locus      | gene | group      | product                                                | log <sub>2</sub> (fold change) | p value | p adj |
|------------|------|------------|--------------------------------------------------------|--------------------------------|---------|-------|
| AS94_00015 |      |            | hypothetical protein                                   | 0.660                          | 0.003   | 0.007 |
| AS94_00025 |      |            | calcium-binding protein                                | 1.736                          | 0.000   | 0.000 |
| AS94_00060 |      |            | phosphoenolpyruvate carboxykinase                      | 1.067                          | 0.000   | 0.000 |
| AS94_00150 |      |            | Diaminohydroxyphosphori-bosylaminopyrimidine deaminase | 0.875                          | 0.000   | 0.000 |
| AS94_00155 |      |            | riboflavin synthase subunit alpha                      | 0.706                          | 0.001   | 0.002 |
| AS94_00160 |      |            | GTP cyclohydrolase                                     | 0.537                          | 0.001   | 0.002 |
| AS94_00170 |      |            | proline dehydrogenase                                  | 1.615                          | 0.000   | 0.000 |
| AS94_00175 |      |            | lysophospholipase                                      | 0.756                          | 0.000   | 0.000 |
| AS94_00180 |      |            | MarR family transcriptional regulator                  | 0.865                          | 0.000   | 0.000 |
| AS94_00275 |      |            | hypothetical protein                                   | 0.824                          | 0.000   | 0.000 |
| AS94_00280 |      |            | tRNA-binding protein                                   | 1.016                          | 0.000   | 0.000 |
| AS94_00285 |      |            | cell division protein FtsK                             | 1.082                          | 0.000   | 0.000 |
| AS94_00290 |      |            | UDP-N-acetylmuramate--alanine ligase                   | 0.757                          | 0.000   | 0.000 |
| AS94_00295 |      |            | hypothetical protein                                   | 0.733                          | 0.000   | 0.000 |
| AS94_00300 |      | host genes | smooth muscle caldesmon                                | 1.244                          | 0.000   | 0.000 |
| AS94_00315 |      |            | histone deacetylase                                    | 0.387                          | 0.016   | 0.035 |
| AS94_00325 |      |            | acetyl-CoA synthetase                                  | 1.010                          | 0.000   | 0.000 |
| AS94_00330 |      |            | formate--tetrahydrofolate ligase                       | 0.454                          | 0.000   | 0.000 |
| AS94_00350 |      |            | serine protease                                        | 1.577                          | 0.000   | 0.000 |
| AS94_00390 |      |            | 30S ribosomal protein S4                               | 0.373                          | 0.001   | 0.002 |
| AS94_00400 |      |            | septation ring formation regulator EzrA                | 0.257                          | 0.014   | 0.031 |
| AS94_00430 |      |            | acetate kinase                                         | 0.426                          | 0.000   | 0.000 |
| AS94_00440 |      |            | alanine dehydrogenase                                  | 0.949                          | 0.000   | 0.000 |
| AS94_00480 |      |            | oligoribonuclease                                      | 0.299                          | 0.018   | 0.039 |
| AS94_00520 |      |            | citrate synthase                                       | 0.281                          | 0.012   | 0.027 |
| AS94_00530 |      |            | PhoP family transcriptional regulator                  | 0.419                          | 0.007   | 0.016 |
| AS94_00560 |      |            | glyceraldehyde-3-phosphate dehydrogenase               | 1.143                          | 0.000   | 0.000 |
| AS94_00590 |      |            | translation initiation factor IF-3                     | 1.000                          | 0.000   | 0.000 |
| AS94_00595 |      |            | 50S ribosomal protein L35                              | 1.059                          | 0.000   | 0.000 |
| AS94_00600 |      |            | 50S ribosomal protein L20                              | 1.117                          | 0.000   | 0.000 |

|            |                                                   |       |       |       |
|------------|---------------------------------------------------|-------|-------|-------|
| AS94_00605 | DNA mismatch repair protein MutT                  | 0.660 | 0.001 | 0.002 |
| AS94_00615 | trigger factor                                    | 0.854 | 0.000 | 0.000 |
| AS94_00620 | ATP-dependent protease                            | 0.503 | 0.000 | 0.000 |
| AS94_00625 | GTP-binding protein YsxC                          | 0.661 | 0.001 | 0.002 |
| AS94_00630 | glutamyl-tRNA reductase                           | 0.704 | 0.000 | 0.000 |
| AS94_00635 | cytochrome C assembly protein                     | 0.951 | 0.000 | 0.000 |
| AS94_00640 | porphobilinogen deaminase                         | 0.989 | 0.000 | 0.000 |
| AS94_00660 | aminopeptidase                                    | 0.487 | 0.000 | 0.001 |
| AS94_00700 | membrane protein                                  | 4.341 | 0.000 | 0.000 |
| AS94_00705 | hypothetical protein                              | 4.081 | 0.000 | 0.000 |
| AS94_00710 | rod shape-determining protein MreC                | 0.883 | 0.000 | 0.000 |
| AS94_00715 | rod shape-determining protein MreD                | 0.811 | 0.000 | 0.000 |
| AS94_00760 | queuine tRNA-ribosyltransferase                   | 0.340 | 0.006 | 0.014 |
| AS94_00815 | hypothetical protein                              | 0.284 | 0.024 | 0.050 |
| AS94_00825 | Rrf2 family transcriptional regulator             | 0.524 | 0.000 | 0.001 |
| AS94_00830 | hypothetical protein                              | 1.334 | 0.000 | 0.000 |
| AS94_00910 | allophanate hydrolase subunit 1                   | 2.336 | 0.000 | 0.000 |
| AS94_00915 | allophanate hydrolase subunit 2                   | 2.139 | 0.000 | 0.000 |
| AS94_00920 | acetyl-CoA carboxylase                            | 1.965 | 0.000 | 0.000 |
| AS94_00925 | acetyl-CoA carboxylase biotin carboxylase subunit | 2.097 | 0.000 | 0.000 |
| AS94_00930 | hypothetical protein                              | 2.053 | 0.000 | 0.000 |
| AS94_00935 | iron transporter                                  | 1.804 | 0.000 | 0.000 |
| AS94_00955 | S-adenosylhomocysteine nucleosidase               | 1.166 | 0.000 | 0.000 |
| AS94_00960 | hypothetical protein                              | 1.194 | 0.000 | 0.000 |
| AS94_00965 | GTPase                                            | 1.265 | 0.000 | 0.000 |
| AS94_00970 | shikimate 5-dehydrogenase                         | 1.269 | 0.000 | 0.000 |
| AS94_00980 | nicotinic acid mononucleotide adenylyltransferase | 1.241 | 0.000 | 0.000 |
| AS94_00985 | HAD family hydrolase                              | 1.207 | 0.000 | 0.000 |
| AS94_00990 | Ioap family protein                               | 1.229 | 0.000 | 0.000 |
| AS94_00995 | methyltransferase                                 | 0.906 | 0.000 | 0.000 |
| AS94_01020 | 30S ribosomal protein S20                         | 0.520 | 0.000 | 0.000 |
| AS94_01035 | HrcA family transcriptional regulator             | 0.522 | 0.000 | 0.000 |
| AS94_01040 | heat shock protein GrpE                           | 0.650 | 0.000 | 0.000 |
| AS94_01045 | molecular chaperone DnaK                          | 0.494 | 0.000 | 0.000 |

|            |                                                   |       |       |       |
|------------|---------------------------------------------------|-------|-------|-------|
| AS94_01050 | molecular chaperone DnaJ                          | 0.961 | 0.000 | 0.000 |
| AS94_01055 | ribosomal protein L11 methyltransferase           | 1.068 | 0.000 | 0.000 |
| AS94_01060 | 16S rRNA methyltransferase                        | 0.843 | 0.000 | 0.000 |
| AS94_01070 | 30S ribosomal protein S21                         | 0.488 | 0.001 | 0.003 |
| AS94_01075 | serine protease                                   | 0.870 | 0.000 | 0.000 |
| AS94_01080 | hypothetical protein                              | 0.458 | 0.000 | 0.000 |
| AS94_01085 | iron transporter                                  | 0.510 | 0.000 | 0.000 |
| AS94_01095 | rRNA maturation factor                            | 0.451 | 0.006 | 0.014 |
| AS94_01110 | GTPase Era                                        | 0.359 | 0.003 | 0.008 |
| AS94_01120 | glycyl-tRNA synthetase                            | 1.346 | 0.000 | 0.000 |
| AS94_01130 | phosphotransferase                                | 0.428 | 0.001 | 0.003 |
| AS94_01145 | SAM-dependent methyltransferase                   | 0.488 | 0.004 | 0.010 |
| AS94_01190 | penicillin-binding protein 3                      | 0.428 | 0.000 | 0.001 |
| AS94_01195 | 50S ribosomal protein L33                         | 0.679 | 0.005 | 0.011 |
| AS94_01200 | 5-formyltetrahydrofolate cyclo-ligase             | 0.881 | 0.000 | 0.000 |
| AS94_01205 | membrane protein                                  | 0.926 | 0.000 | 0.000 |
| AS94_01215 | glucokinase                                       | 0.797 | 0.000 | 0.000 |
| AS94_01220 | hypothetical protein                              | 0.789 | 0.003 | 0.006 |
| AS94_01225 | hydroxyacylglutathione hydrolase                  | 0.588 | 0.000 | 0.000 |
| AS94_01305 | elongation factor P                               | 0.499 | 0.000 | 0.000 |
| AS94_01310 | acetyl-CoA carboxylase                            | 0.721 | 0.000 | 0.000 |
| AS94_01315 | acetyl-CoA carboxylase biotin carboxylase subunit | 0.754 | 0.000 | 0.000 |
| AS94_01320 | hypothetical protein                              | 0.689 | 0.000 | 0.000 |
| AS94_01325 | transcription antitermination protein NusB        | 0.624 | 0.000 | 0.001 |
| AS94_01330 | exodeoxyribonuclease VII large subunit            | 0.719 | 0.000 | 0.000 |
| AS94_01340 | geranyltranstransferase                           | 0.730 | 0.000 | 0.000 |
| AS94_01345 | arginine repressor ArgR                           | 1.479 | 0.000 | 0.000 |
| AS94_01350 | DNA repair protein RecN                           | 1.672 | 0.000 | 0.000 |
| AS94_01355 | dihydrolipoamide dehydrogenase                    | 0.839 | 0.000 | 0.000 |
| AS94_01375 | hypothetical protein                              | 0.615 | 0.001 | 0.002 |
| AS94_01380 | membrane protein                                  | 0.468 | 0.001 | 0.004 |
| AS94_01485 | PhoP family transcriptional regulator             | 0.788 | 0.000 | 0.000 |
| AS94_01495 | hypothetical protein                              | 1.538 | 0.000 | 0.000 |
| AS94_01500 | hypothetical protein                              | 1.402 | 0.000 | 0.000 |

|            |                                                                         |       |       |       |
|------------|-------------------------------------------------------------------------|-------|-------|-------|
| AS94_01505 | hypothetical protein                                                    | 0.680 | 0.001 | 0.004 |
| AS94_01520 | hypothetical protein                                                    | 0.543 | 0.003 | 0.008 |
| AS94_01525 | ATP-dependent DNA helicase RecQ                                         | 0.528 | 0.001 | 0.002 |
| AS94_01530 | peptidoglycan-binding protein LysM                                      | 0.307 | 0.004 | 0.009 |
| AS94_01550 | 30S ribosomal protein S1                                                | 0.572 | 0.000 | 0.000 |
| AS94_01580 | heptaprenyl diphosphate synthase subunit II                             | 0.302 | 0.011 | 0.025 |
| AS94_01585 | nucleoside diphosphate kinase                                           | 0.908 | 0.000 | 0.000 |
| AS94_01655 | asparaginyl-tRNA synthase                                               | 0.647 | 0.000 | 0.000 |
| AS94_01675 | transglycosylase                                                        | 0.938 | 0.000 | 0.000 |
| AS94_01680 | recombinase RecU                                                        | 0.957 | 0.000 | 0.000 |
| AS94_01685 | hypothetical protein                                                    | 0.939 | 0.000 | 0.000 |
| AS94_01690 | hypothetical protein                                                    | 1.112 | 0.000 | 0.000 |
| AS94_01695 | cell cycle protein GpsB                                                 | 1.240 | 0.000 | 0.000 |
| AS94_01705 | RNA methyltransferase                                                   | 0.776 | 0.000 | 0.000 |
| AS94_01710 | hypothetical protein                                                    | 0.838 | 0.001 | 0.002 |
| AS94_01715 | sulfite reductase subunit alpha                                         | 1.736 | 0.000 | 0.000 |
| AS94_01720 | dynamain family protein                                                 | 0.862 | 0.000 | 0.000 |
| AS94_01785 | thymidylate synthase                                                    | 0.640 | 0.000 | 0.000 |
| AS94_01830 | UDP-diphospho-muramoylpentapeptide beta-N-acetylglucosaminyltransferase | 0.716 | 0.000 | 0.000 |
| AS94_01835 | phosphatidic acid phosphatase                                           | 0.712 | 0.000 | 0.000 |
| AS94_01855 | 2-oxoglutarate dehydrogenase E1                                         | 0.749 | 0.000 | 0.000 |
| AS94_01860 | dihydrolipoamide succinyltransferase                                    | 0.503 | 0.000 | 0.000 |
| AS94_01890 | hypothetical protein                                                    | 0.510 | 0.005 | 0.012 |
| AS94_01895 | nitric oxide reductase activation protein NorD                          | 0.440 | 0.001 | 0.002 |
| AS94_01905 | tellurite resistance protein TelA                                       | 0.632 | 0.000 | 0.000 |
| AS94_01910 | 5-bromo-4-chloroindolyl phosphate hydrolysis protein                    | 0.643 | 0.000 | 0.001 |
| AS94_01915 | acylphosphatase                                                         | 0.711 | 0.000 | 0.001 |
| AS94_01965 | dihydrodipicolinate synthase                                            | 0.722 | 0.008 | 0.018 |
| AS94_01970 | aspartate-semialdehyde dehydrogenase                                    | 0.788 | 0.002 | 0.006 |
| AS94_01975 | aspartate kinase                                                        | 1.040 | 0.000 | 0.001 |
| AS94_01990 | thioredoxine reductase                                                  | 1.610 | 0.000 | 0.000 |
| AS94_02120 | LytR family transcriptional regulator                                   | 0.923 | 0.000 | 0.000 |
| AS94_02130 | phosphatidylglycerol lysyltransferase                                   | 0.491 | 0.000 | 0.000 |

|            |                                           |       |       |       |
|------------|-------------------------------------------|-------|-------|-------|
| AS94_02155 | DNA topoisomerase IV subunit A            | 0.352 | 0.002 | 0.005 |
| AS94_02160 | DNA topoisomerase IV subunit B            | 0.552 | 0.000 | 0.000 |
| AS94_02175 | 4-hydroxybenzoyl-CoA thioesterase         | 0.518 | 0.000 | 0.000 |
| AS94_02180 | aconitate hydratase                       | 0.738 | 0.000 | 0.000 |
| AS94_02185 | choline transporter                       | 0.664 | 0.000 | 0.000 |
| AS94_02240 | secretion protein                         | 0.883 | 0.000 | 0.000 |
| AS94_02245 | guanosine 5'-monophosphate oxidoreductase | 1.455 | 0.000 | 0.000 |
| AS94_02275 | HAD family hydrolase                      | 0.367 | 0.004 | 0.009 |
| AS94_02280 | homoserine kinase                         | 0.931 | 0.000 | 0.000 |
| AS94_02285 | threonine synthase                        | 0.589 | 0.000 | 0.000 |
| AS94_02290 | homoserine dehydrogenase                  | 1.028 | 0.000 | 0.000 |
| AS94_02295 | aspartate kinase                          | 1.786 | 0.000 | 0.000 |
| AS94_02300 | hypothetical protein                      | 0.735 | 0.000 | 0.001 |
| AS94_02480 | DNA-binding protein                       | 0.311 | 0.018 | 0.038 |
| AS94_02545 | glycerol kinase                           | 0.527 | 0.000 | 0.000 |
| AS94_02560 | DNA mismatch repair protein MutL          | 0.631 | 0.000 | 0.000 |
| AS94_02565 | DNA mismatch repair protein MutS          | 0.494 | 0.000 | 0.000 |
| AS94_02635 | hypothetical protein                      | 0.424 | 0.002 | 0.005 |
| AS94_02645 | zinc protease                             | 0.371 | 0.016 | 0.036 |
| AS94_02675 | 30S ribosomal protein S15                 | 0.308 | 0.004 | 0.009 |
| AS94_02685 | tRNA pseudouridine synthase B             | 0.497 | 0.006 | 0.015 |
| AS94_02700 | 50S ribosomal protein L7                  | 0.624 | 0.000 | 0.001 |
| AS94_02710 | transcription elongation factor NusA      | 0.691 | 0.000 | 0.000 |
| AS94_02715 | ribosome maturation protein RimP          | 0.884 | 0.000 | 0.000 |
| AS94_02725 | prolyl-tRNA synthetase                    | 0.509 | 0.000 | 0.000 |
| AS94_02730 | zinc metalloprotease                      | 0.662 | 0.000 | 0.000 |
| AS94_02735 | phosphatidate cytidyltransferase          | 0.535 | 0.000 | 0.001 |
| AS94_02740 | UDP pyrophosphate synthase                | 0.891 | 0.000 | 0.000 |
| AS94_02755 | elongation factor Ts                      | 1.115 | 0.000 | 0.000 |
| AS94_02760 | 30S ribosomal protein S2                  | 1.029 | 0.000 | 0.000 |
| AS94_02765 | transcriptional regulator                 | 0.678 | 0.000 | 0.000 |
| AS94_02770 | ATP-dependent protease                    | 1.064 | 0.000 | 0.000 |
| AS94_02775 | ATP-dependent protease                    | 1.054 | 0.000 | 0.000 |
| AS94_02780 | tyrosine recombinase XerC                 | 1.247 | 0.000 | 0.000 |

|            |                                                      |       |       |       |
|------------|------------------------------------------------------|-------|-------|-------|
| AS94_02785 | tRNA (uracil-5-)-methyltransferase                   | 0.500 | 0.000 | 0.000 |
| AS94_02790 | DNA topoisomerase I                                  | 0.542 | 0.000 | 0.000 |
| AS94_02815 | succinyl-CoA synthetase subsunit alpha               | 0.905 | 0.000 | 0.000 |
| AS94_02820 | malate--CoA ligase subunit beta                      | 1.209 | 0.000 | 0.000 |
| AS94_02845 | 50S ribosomal protein L19                            | 0.613 | 0.000 | 0.000 |
| AS94_02880 | chromosome segregation protein SMC                   | 0.423 | 0.000 | 0.001 |
| AS94_02890 | acyl carrier protein                                 | 0.341 | 0.018 | 0.038 |
| AS94_02905 | phosphate acyltransferase                            | 0.597 | 0.000 | 0.000 |
| AS94_02910 | transcription factor                                 | 0.953 | 0.000 | 0.000 |
| AS94_02920 | hypothetical protein                                 | 0.695 | 0.000 | 0.000 |
| AS94_02925 | hypothetical protein                                 | 0.375 | 0.008 | 0.019 |
| AS94_02945 | GTPase                                               | 0.476 | 0.002 | 0.004 |
| AS94_03015 | 3-demethylubiquinone-9 3-methyltransferase           | 0.586 | 0.000 | 0.000 |
| AS94_03020 | hypothetical protein                                 | 1.416 | 0.007 | 0.016 |
| AS94_03025 | orotate phosphoribosyltransferase                    | 1.077 | 0.000 | 0.000 |
| AS94_03030 | orotidine 5'-phosphate decarboxylase                 | 1.367 | 0.000 | 0.000 |
| AS94_03035 | carbamoyl phosphate synthase large subunit           | 1.053 | 0.000 | 0.000 |
| AS94_03040 | carbamoyl phosphate synthase small subunit           | 0.581 | 0.006 | 0.014 |
| AS94_03115 | cell division protein FtsZ                           | 0.604 | 0.000 | 0.000 |
| AS94_03120 | cell division protein FtsA                           | 0.822 | 0.000 | 0.000 |
| AS94_03125 | cell division protein FtsQ                           | 0.928 | 0.000 | 0.000 |
| AS94_03130 | UDP-N-acetylmuramoyl-L-alanyl-D-glutamate synthetase | 0.934 | 0.000 | 0.000 |
| AS94_03135 | phospho-N-acetylmuramoyl-pentapeptide- transferase   | 0.826 | 0.000 | 0.000 |
| AS94_03140 | penicillin-binding protein 1                         | 1.170 | 0.000 | 0.000 |
| AS94_03145 | cell division protein FtsL                           | 0.888 | 0.000 | 0.000 |
| AS94_03150 | 16S rRNA methyltransferase                           | 1.212 | 0.000 | 0.000 |
| AS94_03155 | cell division protein MraZ                           | 1.280 | 0.000 | 0.000 |
| AS94_03165 | hypothetical protein                                 | 1.215 | 0.000 | 0.000 |
| AS94_03175 | hypothetical protein                                 | 1.307 | 0.003 | 0.007 |
| AS94_03180 | hypothetical protein                                 | 1.479 | 0.002 | 0.005 |
| AS94_03195 | ethanolamine utilization protein EutQ                | 1.162 | 0.000 | 0.000 |
| AS94_03245 | leukocidin/Hemolysin toxin family protein            | 3.250 | 0.000 | 0.000 |
| AS94_03310 | succinate dehydrogenase flavoprotein subunit         | 0.464 | 0.001 | 0.002 |

|            |                                                                 |       |       |       |
|------------|-----------------------------------------------------------------|-------|-------|-------|
| AS94_03315 | succinate dehydrogenase cytochrome B558                         | 0.894 | 0.000 | 0.000 |
| AS94_03330 | DNA mismatch repair protein MutS                                | 0.697 | 0.000 | 0.000 |
| AS94_03335 | DNA polymerase                                                  | 0.666 | 0.000 | 0.000 |
| AS94_03460 | membrane protein                                                | 0.796 | 0.000 | 0.000 |
| AS94_03465 | protoheme IX farnesyltransferase                                | 0.918 | 0.000 | 0.000 |
| AS94_03470 | heme A synthase                                                 | 1.041 | 0.000 | 0.000 |
| AS94_03475 | pyruvate carboxylase                                            | 0.539 | 0.000 | 0.000 |
| AS94_03490 | hypothetical protein                                            | 0.349 | 0.010 | 0.024 |
| AS94_03495 | GTP-binding protein                                             | 0.529 | 0.000 | 0.000 |
| AS94_03530 | spermidine/putrescine ABC transporter substrate-binding protein | 0.755 | 0.000 | 0.000 |
| AS94_03570 | 2-oxoisovalerate dehydrogenase subunit beta                     | 0.273 | 0.008 | 0.020 |
| AS94_03575 | pyruvate dehydrogenase E1 subunit alpha                         | 0.329 | 0.001 | 0.004 |
| AS94_03600 | potassium transporter Trk                                       | 0.799 | 0.000 | 0.000 |
| AS94_03605 | cytochrome D ubiquinol oxidase subunit II                       | 2.006 | 0.000 | 0.000 |
| AS94_03610 | cytochrome D ubiquinol oxidase subunit I                        | 2.035 | 0.000 | 0.000 |
| AS94_03620 | phosphoenolpyruvate-protein phosphotransferase                  | 0.676 | 0.000 | 0.000 |
| AS94_03625 | phosphocarrier protein HPr                                      | 0.818 | 0.000 | 0.000 |
| AS94_03630 | hypothetical protein                                            | 0.659 | 0.000 | 0.000 |
| AS94_03640 | membrane protein                                                | 0.657 | 0.000 | 0.000 |
| AS94_03645 | hypothetical protein                                            | 1.397 | 0.021 | 0.045 |
| AS94_03665 | phosphoribosylamine--glycine ligase                             | 0.727 | 0.000 | 0.000 |
| AS94_03670 | purine biosynthesis protein purH                                | 1.399 | 0.000 | 0.000 |
| AS94_03675 | phosphoribosylglycinamide formyltransferase                     | 1.815 | 0.000 | 0.000 |
| AS94_03680 | phosphoribosylaminoimidazole synthetase                         | 1.666 | 0.000 | 0.000 |
| AS94_03685 | amidophosphoribosyltransferase                                  | 1.530 | 0.000 | 0.000 |
| AS94_03690 | phosphoribosylformylglycinamidine synthase                      | 1.235 | 0.000 | 0.000 |
| AS94_03695 | phosphoribosylformylglycinamidine synthase                      | 0.766 | 0.007 | 0.016 |
| AS94_03710 | phosphoribosylaminoimidazole carboxylase                        | 0.802 | 0.002 | 0.006 |
| AS94_03720 | tetrahydrofolate dehydrogenase                                  | 0.820 | 0.000 | 0.000 |
| AS94_03730 | chitinase                                                       | 1.288 | 0.000 | 0.000 |
| AS94_03755 | methicillin resistance protein FmtA                             | 0.938 | 0.000 | 0.000 |
| AS94_03885 | CAAX amino terminal protease                                    | 0.522 | 0.004 | 0.009 |
| AS94_03965 | hypothetical protein                                            | 0.913 | 0.000 | 0.000 |

|            |                                                      |       |       |       |
|------------|------------------------------------------------------|-------|-------|-------|
| AS94_04055 | tryptophanyl-tRNA synthetase                         | 0.309 | 0.018 | 0.039 |
| AS94_04085 | peptide ABC transporter substrate-binding protein    | 0.857 | 0.000 | 0.000 |
| AS94_04090 | peptide ABC transporter ATP-binding protein          | 0.781 | 0.000 | 0.001 |
| AS94_04095 | peptide ABC transporter ATP-binding protein          | 0.841 | 0.000 | 0.001 |
| AS94_04100 | peptide ABC transporter permease                     | 0.798 | 0.000 | 0.000 |
| AS94_04105 | peptide ABC transporter permease                     | 0.892 | 0.000 | 0.000 |
| AS94_04115 | 3-oxoacyl-ACP synthase                               | 0.295 | 0.012 | 0.027 |
| AS94_04120 | 3-oxoacyl-ACP synthase                               | 0.517 | 0.001 | 0.002 |
| AS94_04135 | phosphatidylethanolamine-binding protein             | 0.681 | 0.008 | 0.018 |
| AS94_04145 | ATP-dependent Clp protease ATP-binding protein       | 0.588 | 0.000 | 0.000 |
| AS94_04160 | phosphatase                                          | 0.388 | 0.009 | 0.020 |
| AS94_04170 | hypothetical protein                                 | 0.505 | 0.005 | 0.013 |
| AS94_04190 | signal peptidase IB                                  | 1.066 | 0.000 | 0.000 |
| AS94_04195 | signal peptidase I                                   | 1.031 | 0.000 | 0.000 |
| AS94_04200 | hypothetical protein                                 | 0.433 | 0.007 | 0.016 |
| AS94_04220 | argininosuccinate synthase                           | 6.152 | 0.000 | 0.000 |
| AS94_04225 | argininosuccinate lyase                              | 5.631 | 0.000 | 0.000 |
| AS94_04235 | glutamate dehydrogenase                              | 0.255 | 0.023 | 0.049 |
| AS94_04240 | ornithine-oxoacid aminotransferase                   | 0.680 | 0.000 | 0.000 |
| AS94_04250 | general stress protein                               | 0.361 | 0.012 | 0.027 |
| AS94_04320 | NADH dehydrogenase                                   | 0.734 | 0.000 | 0.000 |
| AS94_04335 | NADH dehydrogenase                                   | 0.362 | 0.005 | 0.013 |
| AS94_04340 | disulfide oxidoreductase                             | 0.723 | 0.000 | 0.001 |
| AS94_04350 | D-alanyl-lipoteichoic acid biosynthesis protein DltD | 0.752 | 0.000 | 0.000 |
| AS94_04360 | D-alanyl transfer protein DltB                       | 0.718 | 0.000 | 0.000 |
| AS94_04365 | D-alanine--poly(phosphoribitol) ligase               | 0.968 | 0.000 | 0.000 |
| AS94_04405 | 5'-nucleotidase                                      | 0.507 | 0.000 | 0.001 |
| AS94_04410 | membrane protein                                     | 0.513 | 0.006 | 0.015 |
| AS94_04450 | Fe-S cluster assembly protein SufD                   | 0.535 | 0.000 | 0.000 |
| AS94_04455 | iron ABC transporter ATP-binding protein             | 0.820 | 0.000 | 0.000 |
| AS94_04460 | hypothetical protein                                 | 0.824 | 0.000 | 0.000 |
| AS94_04470 | methionine ABC transporter substrate-binding protein | 0.403 | 0.015 | 0.032 |
| AS94_04475 | ABC transporter permease                             | 0.565 | 0.017 | 0.037 |
| AS94_04485 | thioredoxin                                          | 0.494 | 0.023 | 0.049 |



|            |                                                                         |       |       |       |
|------------|-------------------------------------------------------------------------|-------|-------|-------|
| AS94_04490 | topiosmerase                                                            | 0.653 | 0.002 | 0.004 |
| AS94_04540 | phosphoglycerate mutase                                                 | 0.940 | 0.000 | 0.000 |
| AS94_04550 | hypothetical protein                                                    | 0.812 | 0.000 | 0.001 |
| AS94_04605 | clumping factor A                                                       | 0.694 | 0.000 | 0.000 |
| AS94_04635 | enterotoxin                                                             | 0.775 | 0.000 | 0.000 |
| AS94_04655 | hypothetical protein                                                    | 0.752 | 0.000 | 0.000 |
| AS94_04670 | hydrolase                                                               | 1.770 | 0.000 | 0.000 |
| AS94_04725 | haloacid dehalogenase                                                   | 1.456 | 0.000 | 0.000 |
| AS94_04730 | glycine/betaine MFS transporter                                         | 1.381 | 0.000 | 0.000 |
| AS94_04735 | long-chain fatty acid--CoA ligase                                       | 3.781 | 0.000 | 0.000 |
| AS94_04740 | acetyl-CoA acetyltransferase                                            | 2.229 | 0.000 | 0.000 |
| AS94_04745 | vraC                                                                    | 3.127 | 0.000 | 0.000 |
| AS94_04750 | hypothetical protein                                                    | 3.366 | 0.000 | 0.000 |
| AS94_04755 | vraX                                                                    | 3.312 | 0.000 | 0.000 |
| AS94_04780 | amino acid permease                                                     | 0.782 | 0.000 | 0.000 |
| AS94_04810 | mevalonate kinase                                                       | 1.382 | 0.000 | 0.000 |
| AS94_04815 | diphosphomevalonate decarboxylase                                       | 1.502 | 0.000 | 0.000 |
| AS94_04820 | phosphomevalonate kinase                                                | 1.298 | 0.000 | 0.000 |
| AS94_04840 | transposase                                                             | 0.745 | 0.000 | 0.000 |
| AS94_04845 | hypothetical protein                                                    | 0.905 | 0.007 | 0.017 |
| AS94_04865 | oxidoreductase ion channel protein IolS                                 | 0.429 | 0.003 | 0.008 |
| AS94_04950 | lysyl-tRNA synthetase                                                   | 0.428 | 0.000 | 0.000 |
| AS94_04955 | 2-amino-4-hydroxy-6- hydroxymethyldihydropteridine<br>pyrophosphokinase | 1.123 | 0.000 | 0.000 |
| AS94_04960 | dihydroneopterin aldolase                                               | 1.843 | 0.000 | 0.000 |
| AS94_04965 | dihydropteroate synthase                                                | 2.032 | 0.000 | 0.000 |
| AS94_04980 | zinc metalloprotease                                                    | 0.368 | 0.000 | 0.001 |
| AS94_04985 | hypoxanthine phosphoribosyltransferase                                  | 0.367 | 0.009 | 0.022 |
| AS94_05140 | hypothetical protein                                                    | 0.541 | 0.020 | 0.043 |
| AS94_05190 | 1-phosphatidylinositol phosphodiesterase                                | 0.916 | 0.000 | 0.001 |
| AS94_05340 | replication initiation factor family protein                            | 3.139 | 0.004 | 0.010 |
| AS94_05345 | hypothetical protein                                                    | 3.206 | 0.008 | 0.019 |
| AS94_05350 | hypothetical protein                                                    | 3.347 | 0.007 | 0.016 |
| AS94_05355 | hypothetical protein                                                    | 3.487 | 0.006 | 0.014 |

|            |              |                                          |       |       |       |
|------------|--------------|------------------------------------------|-------|-------|-------|
| AS94_05420 |              | ATP-binding protein                      | 0.456 | 0.001 | 0.003 |
| AS94_05435 |              | integrase                                | 1.211 | 0.008 | 0.018 |
| AS94_05465 |              | hemolysin III                            | 0.763 | 0.000 | 0.000 |
| AS94_05470 |              | uridylyltransferase                      | 0.742 | 0.000 | 0.000 |
| AS94_05475 |              | membrane protein                         | 0.671 | 0.000 | 0.000 |
| AS94_05480 |              | hypothetical protein                     | 0.698 | 0.000 | 0.000 |
| AS94_05485 |              | membrane protein                         | 2.482 | 0.000 | 0.000 |
| AS94_05525 | <i>asp23</i> | alkaline shock protein 23                | 1.013 | 0.000 | 0.000 |
| AS94_05530 |              | membrane protein                         | 0.845 | 0.000 | 0.000 |
| AS94_05535 |              | hypothetical protein                     | 0.691 | 0.000 | 0.000 |
| AS94_05540 |              | glycine/betaine ABC transporter permease | 1.196 | 0.000 | 0.000 |
| AS94_05625 |              | hyaluronate lyase                        | 0.558 | 0.002 | 0.004 |
| AS94_05650 |              | toxin                                    | 1.240 | 0.000 | 0.000 |
| AS94_05680 |              | 30S ribosomal protein S9                 | 0.961 | 0.000 | 0.000 |
| AS94_05685 |              | 50S ribosomal protein L13                | 1.063 | 0.000 | 0.000 |
| AS94_05775 |              | 30S ribosomal protein S8                 | 0.479 | 0.001 | 0.003 |
| AS94_05785 |              | 50S ribosomal protein L5                 | 0.452 | 0.001 | 0.002 |
| AS94_05790 |              | 50S ribosomal protein L24                | 0.643 | 0.000 | 0.000 |
| AS94_05795 |              | 50S ribosomal protein L14                | 0.359 | 0.008 | 0.019 |
| AS94_05800 |              | 30S ribosomal protein S17                | 0.698 | 0.000 | 0.001 |
| AS94_05810 |              | 50S ribosomal protein L16                | 0.540 | 0.000 | 0.000 |
| AS94_05815 |              | 30S ribosomal protein S3                 | 0.601 | 0.000 | 0.000 |
| AS94_05820 |              | 50S ribosomal protein L22                | 0.524 | 0.000 | 0.001 |
| AS94_05825 |              | 30S ribosomal protein S19                | 0.607 | 0.000 | 0.000 |
| AS94_05830 |              | 50S ribosomal protein L2                 | 0.452 | 0.000 | 0.001 |
| AS94_05835 |              | 50S ribosomal protein L23                | 0.627 | 0.000 | 0.001 |
| AS94_05840 |              | 50S ribosomal protein L4                 | 0.377 | 0.004 | 0.010 |
| AS94_05845 |              | 50S ribosomal protein L3                 | 0.609 | 0.000 | 0.000 |
| AS94_05850 |              | 30S ribosomal protein S10                | 0.723 | 0.000 | 0.000 |
| AS94_06080 |              | hypothetical protein                     | 0.859 | 0.000 | 0.000 |
| AS94_06085 |              | sodium:proton antiporter                 | 0.517 | 0.000 | 0.001 |
| AS94_06145 |              | LytR family transcriptional regulator    | 0.788 | 0.000 | 0.000 |
| AS94_06170 |              | RpiR family transcriptional regulator    | 0.335 | 0.011 | 0.025 |
| AS94_06205 |              | hypothetical protein                     | 1.951 | 0.000 | 0.000 |

|            |                                                      |       |       |       |
|------------|------------------------------------------------------|-------|-------|-------|
| AS94_06245 | imidazolonepropionase                                | 2.024 | 0.000 | 0.000 |
| AS94_06250 | urocanate hydratase                                  | 2.078 | 0.000 | 0.000 |
| AS94_06300 | hypothetical protein                                 | 1.044 | 0.000 | 0.000 |
| AS94_06310 | sodium:glutamate symporter                           | 0.613 | 0.000 | 0.000 |
| AS94_06325 | 3-hydroxyacyl-CoA dehydrogenase                      | 0.582 | 0.010 | 0.023 |
| AS94_06365 | membrane protein                                     | 1.731 | 0.000 | 0.000 |
| AS94_06425 | malate:quinone oxidoreductase                        | 0.872 | 0.000 | 0.000 |
| AS94_06430 | L-lactate permease                                   | 0.405 | 0.002 | 0.005 |
| AS94_06435 | CDP-glycerol glycerophosphotransferase               | 0.337 | 0.015 | 0.033 |
| AS94_06450 | quinone oxidoreductase                               | 0.365 | 0.010 | 0.023 |
| AS94_06510 | hypothetical protein                                 | 0.855 | 0.006 | 0.013 |
| AS94_06655 | amino acid ABC transporter substrate-binding protein | 0.523 | 0.000 | 0.001 |
| AS94_06670 | phosphoglyceromutase                                 | 0.821 | 0.000 | 0.000 |
| AS94_06680 | hypothetical protein                                 | 1.886 | 0.000 | 0.000 |
| AS94_06685 | gamma-hemolysin subunit A                            | 0.956 | 0.000 | 0.000 |
| AS94_06755 | glycerate kinase                                     | 1.762 | 0.000 | 0.000 |
| AS94_06760 | membrane protein                                     | 1.999 | 0.000 | 0.000 |
| AS94_06770 | transcriptional regulator                            | 1.084 | 0.001 | 0.002 |
| AS94_06855 | chloramphenicol resistance protein DHA1              | 0.578 | 0.002 | 0.006 |
| AS94_06940 | short-chain dehydrogenase                            | 0.425 | 0.001 | 0.003 |
| AS94_06945 | aminobenzoyl-glutamate transporter                   | 1.048 | 0.000 | 0.000 |
| AS94_07095 | membrane protein                                     | 0.345 | 0.015 | 0.032 |
| AS94_07100 | glucarate transporter                                | 0.578 | 0.000 | 0.001 |
| AS94_07190 | serine dehydratase subunit alpha                     | 1.378 | 0.000 | 0.000 |
| AS94_07195 | serine dehydratase                                   | 1.527 | 0.000 | 0.000 |
| AS94_07200 | transcriptional regulator                            | 1.288 | 0.000 | 0.000 |
| AS94_07270 | hydroxymethylglutaryl-CoA synthase                   | 1.378 | 0.000 | 0.000 |
| AS94_07280 | Clp protease ATP-binding protein                     | 1.294 | 0.000 | 0.000 |
| AS94_07310 | 1-pyrroline-5-carboxylate dehydrogenase              | 1.261 | 0.000 | 0.000 |
| AS94_07320 | hypothetical protein                                 | 4.145 | 0.000 | 0.000 |
| AS94_07350 | dehydrosqualene synthase                             | 0.874 | 0.000 | 0.000 |
| AS94_07355 | 4_4'-diaponeurosporenoate glycosyltransferase        | 0.602 | 0.001 | 0.002 |
| AS94_07360 | diapolycopene oxygenase                              | 0.589 | 0.000 | 0.001 |
| AS94_07480 | dihydroorotate dehydrogenase                         | 0.991 | 0.000 | 0.000 |

|            |             |                                                     |        |       |       |
|------------|-------------|-----------------------------------------------------|--------|-------|-------|
| AS94_07540 |             | amino acid permease                                 | 1.069  | 0.000 | 0.000 |
| AS94_07545 |             | 4-aminobutyrate aminotransferase                    | 1.378  | 0.000 | 0.000 |
| AS94_07615 |             | citrate transporter                                 | 0.791  | 0.006 | 0.015 |
| AS94_07745 |             | Replication and maintenance protein                 | 14.474 | 0.000 | 0.000 |
| AS94_07750 |             | SAM-dependent methyltransferase                     | 15.654 | 0.000 | 0.000 |
| AS94_07835 | <i>sarA</i> | transcriptional regulator                           | 0.621  | 0.000 | 0.000 |
| AS94_07855 |             | recombinase                                         | 0.542  | 0.015 | 0.033 |
| AS94_07860 |             | cation:proton antiporter                            | 0.930  | 0.000 | 0.000 |
| AS94_07865 |             | cation:proton antiporter                            | 1.002  | 0.001 | 0.003 |
| AS94_07870 |             | cation:proton antiporter                            | 1.711  | 0.000 | 0.000 |
| AS94_07875 |             | cation:proton antiporter                            | 1.466  | 0.000 | 0.000 |
| AS94_07880 |             | cation:proton antiporter                            | 1.602  | 0.000 | 0.000 |
| AS94_07890 |             | cation:proton antiporter                            | 1.534  | 0.000 | 0.000 |
| AS94_07900 |             | manganese ABC transporter substrate-binding protein | 1.328  | 0.000 | 0.000 |
| AS94_07905 |             | membrane protein                                    | 1.233  | 0.000 | 0.000 |
| AS94_07910 |             | phosphonate ABC transporter ATP-binding protein     | 1.616  | 0.000 | 0.000 |
| AS94_07920 |             | membrane protein                                    | 1.875  | 0.000 | 0.000 |
| AS94_08150 |             | hypothetical protein                                | 0.884  | 0.000 | 0.000 |
| AS94_08155 |             | UDP pyrophosphate phosphatase                       | 0.818  | 0.000 | 0.000 |
| AS94_08160 |             | cysteine ABC transporter ATP-binding protein        | 0.456  | 0.000 | 0.000 |
| AS94_08165 |             | cysteine ABC transporter ATP-binding protein        | 0.633  | 0.000 | 0.000 |
| AS94_08175 |             | cobalamin biosynthesis protein CobW                 | 0.369  | 0.013 | 0.029 |
| AS94_08190 |             | membrane protein                                    | 0.854  | 0.000 | 0.000 |
| AS94_08205 |             | hypothetical protein                                | 0.684  | 0.010 | 0.022 |
| AS94_08215 |             | multidrug MFS transporter                           | 0.549  | 0.000 | 0.000 |
| AS94_08255 |             | glyoxal reductase                                   | 0.603  | 0.000 | 0.000 |
| AS94_08330 |             | glycerol phosphate lipoteichoic acid synthase       | 1.274  | 0.000 | 0.000 |
| AS94_08350 |             | ABC transporter permease                            | 0.345  | 0.006 | 0.015 |
| AS94_08375 |             | peptide ABC transporter permease                    | 0.447  | 0.000 | 0.001 |
| AS94_08470 |             | membrane protein                                    | 0.675  | 0.000 | 0.000 |
| AS94_08480 |             | hypothetical protein                                | 0.888  | 0.000 | 0.000 |
| AS94_08575 |             | hypothetical protein                                | 0.777  | 0.000 | 0.000 |
| AS94_08580 |             | sporulation protein                                 | 0.537  | 0.000 | 0.000 |
| AS94_08590 |             | ATP-dependent Clp protease proteolytic subunit      | 0.617  | 0.000 | 0.000 |

|            |                                                                  |       |       |       |
|------------|------------------------------------------------------------------|-------|-------|-------|
| AS94_08610 | hypothetical protein                                             | 0.436 | 0.000 | 0.001 |
| AS94_08615 | transcriptional regulator                                        | 0.515 | 0.000 | 0.000 |
| AS94_08675 | integrase                                                        | 0.555 | 0.000 | 0.001 |
| AS94_08680 | DNA-binding protein                                              | 0.540 | 0.013 | 0.029 |
| AS94_08685 | hypothetical protein                                             | 1.686 | 0.014 | 0.030 |
| AS94_08765 | transposase                                                      | 0.728 | 0.003 | 0.007 |
| AS94_08810 | NA                                                               | 1.507 | 0.000 | 0.000 |
| AS94_08960 | phospholipase D                                                  | 0.564 | 0.000 | 0.000 |
| AS94_08965 | phosphohydrolase                                                 | 0.516 | 0.001 | 0.002 |
| AS94_08970 | membrane protein                                                 | 0.290 | 0.015 | 0.033 |
| AS94_09015 | UDP-N-acetylglucosamine 1-carboxyvinyltransferase                | 0.379 | 0.001 | 0.004 |
| AS94_09020 | membrane protein                                                 | 0.970 | 0.023 | 0.049 |
| AS94_09040 | F0F1 ATP synthase subunit alpha                                  | 0.654 | 0.000 | 0.000 |
| AS94_09045 | F0F1 ATP synthase subunit delta                                  | 0.627 | 0.000 | 0.000 |
| AS94_09050 | F0F1 ATP synthase subunit B                                      | 0.895 | 0.000 | 0.000 |
| AS94_09055 | F0F1 ATP synthase subunit C                                      | 0.383 | 0.005 | 0.013 |
| AS94_09060 | F0F1 ATP synthase subunit A                                      | 0.465 | 0.000 | 0.000 |
| AS94_09065 | ATP synthase                                                     | 0.592 | 0.000 | 0.000 |
| AS94_09070 | UDP-N-acetylglucosamine 2-epimerase                              | 0.854 | 0.000 | 0.000 |
| AS94_09075 | uracil phosphoribosyltransferase                                 | 0.793 | 0.000 | 0.000 |
| AS94_09080 | serine hydroxymethyltransferase                                  | 0.792 | 0.000 | 0.000 |
| AS94_09085 | hypothetical protein                                             | 0.872 | 0.000 | 0.000 |
| AS94_09100 | N5-glutamine S-adenosyl-L-methionine-dependent methyltransferase | 0.541 | 0.000 | 0.000 |
| AS94_09105 | peptide chain release factor 1                                   | 0.557 | 0.000 | 0.000 |
| AS94_09115 | 50S ribosomal protein L31                                        | 0.289 | 0.020 | 0.044 |
| AS94_09150 | CTP synthetase                                                   | 0.987 | 0.000 | 0.000 |
| AS94_09160 | acetyltransferase                                                | 0.884 | 0.000 | 0.000 |
| AS94_09165 | pantothenate kinase                                              | 0.645 | 0.001 | 0.003 |
| AS94_09240 | ArsR family transcriptional regulator                            | 1.904 | 0.000 | 0.000 |
| AS94_09245 | cation transporter                                               | 1.318 | 0.000 | 0.000 |
| AS94_09250 | lytic regulatory protein                                         | 0.743 | 0.000 | 0.000 |
| AS94_09275 | PTS mannitol transporter subunit IIB                             | 1.842 | 0.000 | 0.000 |
| AS94_09280 | PTS lactose transporter subunit IIB                              | 1.918 | 0.000 | 0.000 |

|            |                                                    |       |       |       |
|------------|----------------------------------------------------|-------|-------|-------|
| AS94_09285 | PTS mannitol transporter subunit IIA               | 1.500 | 0.000 | 0.000 |
| AS94_09290 | mannitol-1-phosphate 5-dehydrogenase               | 1.509 | 0.000 | 0.000 |
| AS94_09310 | ABC transporter permease                           | 0.367 | 0.002 | 0.006 |
| AS94_09315 | arginase                                           | 0.880 | 0.000 | 0.000 |
| AS94_09360 | NA                                                 | 0.611 | 0.018 | 0.039 |
| AS94_09440 | membrane protein                                   | 1.102 | 0.007 | 0.017 |
| AS94_09450 | membrane protein                                   | 0.844 | 0.004 | 0.009 |
| AS94_09490 | surface protein                                    | 0.634 | 0.000 | 0.000 |
| AS94_09505 | antibiotic MFS transporter                         | 0.562 | 0.002 | 0.006 |
| AS94_09560 | capsular polysaccharide biosynthesis protein CapA  | 1.641 | 0.000 | 0.000 |
| AS94_09565 | capsular polysaccharide biosynthesis protein Cap5B | 1.808 | 0.000 | 0.000 |
| AS94_09570 | capsular polysaccharide biosynthesis protein Cap8C | 1.647 | 0.000 | 0.000 |
| AS94_09575 | polysaccharide biosynthesis protein EpsC           | 1.611 | 0.000 | 0.000 |
| AS94_09580 | UDP-glucose 4-epimerase                            | 1.840 | 0.000 | 0.000 |
| AS94_09585 | capsular polysaccharide biosynthesis protein Cap8F | 1.717 | 0.000 | 0.000 |
| AS94_09590 | UDP-N-acetylglucosamine 2-epimerase                | 1.877 | 0.000 | 0.000 |
| AS94_09595 | capsular polysaccharide biosynthesis protein       | 1.991 | 0.000 | 0.000 |
| AS94_09600 | capsular polysaccharide biosynthesis protein       | 1.620 | 0.000 | 0.000 |
| AS94_09605 | capsular polysaccharide biosynthesis protein       | 1.536 | 0.000 | 0.000 |
| AS94_09610 | capsular polysaccharide biosynthesis protein       | 1.070 | 0.000 | 0.000 |
| AS94_09615 | glycosyltransferase family 1                       | 0.774 | 0.000 | 0.000 |
| AS94_09620 | capsular polysaccharide biosynthesis protein Cap8M | 0.691 | 0.001 | 0.004 |
| AS94_09625 | UDP-glucose 4-epimerase                            | 0.622 | 0.001 | 0.002 |
| AS94_09630 | UDP-N-acetyl-D-mannosamine dehydrogenase           | 0.571 | 0.000 | 0.000 |
| AS94_09660 | hypothetical protein                               | 1.430 | 0.002 | 0.004 |
| AS94_09690 | multidrug MFS transporter                          | 1.144 | 0.000 | 0.000 |
| AS94_09695 | peptide synthetase                                 | 0.353 | 0.002 | 0.004 |
| AS94_09755 | cellobiose operon outer surface protein            | 1.293 | 0.000 | 0.000 |
| AS94_09760 | N-acetylmuramic acid-6-phosphate etherase          | 1.205 | 0.000 | 0.000 |
| AS94_09765 | permease                                           | 1.432 | 0.000 | 0.000 |
| AS94_09770 | RpiR family transcriptional regulator              | 1.547 | 0.000 | 0.000 |
| AS94_09820 | peptidase M23                                      | 0.956 | 0.000 | 0.000 |
| AS94_09865 | antiporter                                         | 2.802 | 0.000 | 0.000 |
| AS94_09880 | iron ABC transporter substrate-binding protein     | 0.571 | 0.015 | 0.033 |

|            |                                                                           |       |       |       |
|------------|---------------------------------------------------------------------------|-------|-------|-------|
| AS94_09920 | 3-hydroxyacyl-CoA dehydrogenase                                           | 1.118 | 0.000 | 0.000 |
| AS94_09925 | glutaryl-CoA dehydrogenase                                                | 1.385 | 0.000 | 0.001 |
| AS94_09930 | long-chain fatty acid--CoA ligase                                         | 1.974 | 0.000 | 0.000 |
| AS94_09935 | coenzyme A transferase                                                    | 2.050 | 0.000 | 0.000 |
| AS94_09955 | NmrA family protein                                                       | 2.065 | 0.000 | 0.000 |
| AS94_09960 | DeoR family transcriptional regulator                                     | 1.475 | 0.000 | 0.000 |
| AS94_09985 | lactate dehydrogenase                                                     | 1.252 | 0.000 | 0.000 |
| AS94_09995 | inosine-uridine preferring nucleoside hydrolase                           | 0.524 | 0.008 | 0.018 |
| AS94_10035 | 2-C-methyl-D-erythritol 4-phosphate<br>cytidylyltransferase               | 0.961 | 0.000 | 0.000 |
| AS94_10040 | ribitol-5-phosphate dehydrogenase                                         | 0.720 | 0.001 | 0.003 |
| AS94_10045 | teichoic acid biosynthesis protein                                        | 0.961 | 0.000 | 0.000 |
| AS94_10050 | CDP-glycerol:glycerophosphate<br>glycerophosphotransferase                | 0.422 | 0.016 | 0.034 |
| AS94_10095 | antiholin                                                                 | 0.788 | 0.000 | 0.000 |
| AS94_10120 | hypothetical protein                                                      | 0.817 | 0.000 | 0.001 |
| AS94_10125 | ribokinase                                                                | 3.000 | 0.000 | 0.000 |
| AS94_10130 | ribose pyranase                                                           | 3.101 | 0.000 | 0.000 |
| AS94_10135 | ribose transporter RbsU                                                   | 3.014 | 0.000 | 0.000 |
| AS94_10200 | virulence factor EsxA                                                     | 0.490 | 0.000 | 0.000 |
| AS94_10205 | type VII secretion protein EsaA                                           | 0.886 | 0.000 | 0.000 |
| AS94_10220 | type VII secretion protein EssB                                           | 0.904 | 0.001 | 0.002 |
| AS94_10225 | cell division protein FtsK                                                | 0.375 | 0.024 | 0.049 |
| AS94_10260 | membrane protein                                                          | 0.767 | 0.013 | 0.029 |
| AS94_10315 | hypothetical protein                                                      | 0.863 | 0.000 | 0.000 |
| AS94_10325 | branched-chain amino acid transporter II carrierprotein                   | 0.668 | 0.000 | 0.000 |
| AS94_10390 | histidine transporter                                                     | 2.250 | 0.000 | 0.000 |
| AS94_10395 | lipase                                                                    | 0.939 | 0.000 | 0.000 |
| AS94_10470 | sn-glycerol-3-phosphate transporter                                       | 1.983 | 0.000 | 0.000 |
| AS94_10555 | acetyl-CoA acetyltransferase                                              | 0.778 | 0.000 | 0.000 |
| AS94_10565 | 5-methyltetrahydropteroyltriglutamate-- homocysteine<br>methyltransferase | 0.777 | 0.000 | 0.000 |
| AS94_10570 | 5_10-methylenetetrahydrofolate reductase                                  | 0.913 | 0.000 | 0.000 |
| AS94_10575 | cystathionine beta-lyase                                                  | 1.129 | 0.001 | 0.003 |

|            |                                                                 |       |       |       |
|------------|-----------------------------------------------------------------|-------|-------|-------|
| AS94_10580 | cystathionine gamma-synthase                                    | 1.239 | 0.000 | 0.001 |
| AS94_10600 | GTP-binding protein YchF                                        | 0.486 | 0.000 | 0.001 |
| AS94_10660 | peptidase                                                       | 1.600 | 0.000 | 0.000 |
| AS94_10670 | membrane protein                                                | 0.649 | 0.000 | 0.000 |
| AS94_10725 | hypothetical protein                                            | 0.638 | 0.000 | 0.000 |
| AS94_10760 | hypothetical protein                                            | 0.432 | 0.002 | 0.006 |
| AS94_10785 | growth inhibitor PemK                                           | 0.716 | 0.000 | 0.000 |
| AS94_10790 | transposase                                                     | 0.770 | 0.009 | 0.021 |
| AS94_10800 | hypothetical protein                                            | 1.022 | 0.000 | 0.000 |
| AS94_10805 | hypothetical protein                                            | 0.657 | 0.000 | 0.000 |
| AS94_10910 | hypothetical protein                                            | 0.681 | 0.001 | 0.002 |
| AS94_10915 | membrane protein                                                | 0.506 | 0.002 | 0.006 |
| AS94_10930 | membrane protein                                                | 0.803 | 0.003 | 0.007 |
| AS94_10935 | cobalamin synthesis protein CobW                                | 2.349 | 0.000 | 0.000 |
| AS94_10985 | methionine ABC transporter ATP-binding protein                  | 1.379 | 0.000 | 0.000 |
| AS94_11005 | membrane protein                                                | 0.379 | 0.021 | 0.044 |
| AS94_11055 | oligo-1_6-glucosidase                                           | 0.290 | 0.013 | 0.029 |
| AS94_11060 | GntR family transcriptional regulator                           | 0.369 | 0.002 | 0.006 |
| AS94_11070 | acetyltransferase                                               | 0.671 | 0.005 | 0.011 |
| AS94_11170 | 16S rRNA methyltransferase                                      | 0.654 | 0.000 | 0.000 |
| AS94_11175 | tRNA uridine 5-carboxymethylaminomethyl<br>modification protein | 0.622 | 0.000 | 0.000 |
| AS94_11180 | tRNA modification GTPase                                        | 0.465 | 0.001 | 0.002 |
| AS94_11185 | ribonuclease P                                                  | 0.738 | 0.003 | 0.008 |
| AS94_11190 | 50S ribosomal protein L34                                       | 0.691 | 0.000 | 0.000 |
| AS94_11195 | chromosome replication protein DnaA                             | 0.676 | 0.000 | 0.000 |
| AS94_11200 | DNA polymerase III subunit beta                                 | 0.677 | 0.000 | 0.000 |
| AS94_11210 | recombinase F                                                   | 0.737 | 0.000 | 0.000 |
| AS94_11215 | DNA gyrase subunit B                                            | 0.798 | 0.000 | 0.000 |
| AS94_11220 | DNA topoisomerase IV subunit A                                  | 0.757 | 0.000 | 0.000 |
| AS94_11230 | histidine ammonia-lyase                                         | 0.796 | 0.000 | 0.000 |
| AS94_11235 | seryl-tRNA synthetase                                           | 1.149 | 0.000 | 0.000 |
| AS94_11275 | adenylosuccinate synthetase                                     | 2.120 | 0.000 | 0.000 |
| AS94_11320 | 50S rRNA methyltransferase                                      | 0.816 | 0.000 | 0.000 |



|            |                                                |       |       |       |
|------------|------------------------------------------------|-------|-------|-------|
| AS94_11325 | hypothetical protein                           | 0.393 | 0.001 | 0.003 |
| AS94_11355 | penicillin-binding protein                     | 0.836 | 0.000 | 0.000 |
| AS94_11360 | methicillin resistance protein                 | 0.420 | 0.005 | 0.013 |
| AS94_11430 | hydrolase                                      | 2.577 | 0.000 | 0.000 |
| AS94_11470 | UDP-glucose 4-epimerase                        | 1.274 | 0.000 | 0.000 |
| AS94_11485 | 2-amino-3-ketobutyrate CoA ligase              | 0.753 | 0.000 | 0.000 |
| AS94_11530 | 16S rRNA methyltransferase                     | 0.752 | 0.000 | 0.000 |
| AS94_11535 | 50S ribosomal protein L7/L12                   | 0.922 | 0.000 | 0.000 |
| AS94_11540 | 50S ribosomal protein L10                      | 1.025 | 0.000 | 0.000 |
| AS94_11545 | 50S ribosomal protein L1                       | 0.948 | 0.000 | 0.000 |
| AS94_11550 | 50S ribosomal protein L11                      | 0.572 | 0.000 | 0.000 |
| AS94_11575 | hypothetical protein                           | 0.637 | 0.000 | 0.001 |
| AS94_11580 | RNA methyltransferase                          | 0.358 | 0.022 | 0.047 |
| AS94_11610 | DNA repair protein RadA                        | 0.344 | 0.007 | 0.016 |
| AS94_11615 | ATP-dependent Clp protease ATP-binding protein | 0.477 | 0.000 | 0.000 |
| AS94_11620 | ATP:guanido phosphotransferase                 | 0.481 | 0.000 | 0.000 |
| AS94_11625 | excinuclease ABC subunit B                     | 0.498 | 0.000 | 0.000 |
| AS94_11630 | CtsR family transcriptional regulator          | 0.406 | 0.000 | 0.001 |
| AS94_11665 | DNA damage-inducible protein DinB              | 0.399 | 0.021 | 0.045 |
| AS94_11680 | lactonase                                      | 1.005 | 0.000 | 0.000 |
| AS94_11740 | lipase                                         | 1.830 | 0.000 | 0.000 |
| AS94_11765 | transcriptional regulator                      | 0.620 | 0.000 | 0.000 |
| AS94_11815 | hypothetical protein                           | 0.719 | 0.003 | 0.007 |
| AS94_11825 | flavin reductase                               | 0.948 | 0.000 | 0.000 |
| AS94_11855 | preprotein translocase subunit SecA            | 0.381 | 0.003 | 0.007 |
| AS94_11870 | surface anchored protein                       | 1.032 | 0.000 | 0.000 |
| AS94_11875 | isochorismatase hydrolase                      | 0.363 | 0.003 | 0.007 |
| AS94_11880 | N-acetylmuramoyl-L-alanine amidase             | 0.606 | 0.000 | 0.000 |
| AS94_11940 | carbamate kinase                               | 0.738 | 0.000 | 0.000 |
| AS94_11945 | Crp/Fnr family transcriptional regulator       | 0.736 | 0.000 | 0.000 |
| AS94_11985 | multidrug ABC transporter ATP-binding protein  | 0.508 | 0.000 | 0.000 |
| AS94_11990 | hypothetical protein                           | 0.619 | 0.000 | 0.000 |
| AS94_12020 | RecX family transcriptional regulator          | 0.815 | 0.000 | 0.000 |
| AS94_12025 | glycosyltransferase                            | 2.930 | 0.000 | 0.000 |

|            |                                                |       |       |       |
|------------|------------------------------------------------|-------|-------|-------|
| AS94_12030 | general stress protein                         | 0.329 | 0.002 | 0.006 |
| AS94_12410 | ribonuclease BN                                | 0.808 | 0.000 | 0.000 |
| AS94_12415 | LuxR family transcriptional regulator          | 3.056 | 0.000 | 0.000 |
| AS94_12420 | sensor histidine kinase                        | 3.494 | 0.000 | 0.000 |
| AS94_12425 | transporter                                    | 3.384 | 0.000 | 0.000 |
| AS94_12430 | hypothetical protein                           | 3.562 | 0.000 | 0.000 |
| AS94_12465 | UDP-N-acetylmuramate--alanine ligase           | 0.425 | 0.001 | 0.004 |
| AS94_12490 | RNA methyltransferase                          | 0.577 | 0.000 | 0.000 |
| AS94_12545 | adenylosuccinate lyase                         | 0.732 | 0.000 | 0.000 |
| AS94_12550 | cysteine protease                              | 2.179 | 0.000 | 0.000 |
| AS94_12555 | staphostatin A                                 | 1.670 | 0.000 | 0.000 |
| AS94_12590 | C4-dicarboxylate ABC transporter               | 0.585 | 0.000 | 0.000 |
| AS94_12630 | beta-lactamase                                 | 0.535 | 0.004 | 0.009 |
| AS94_12635 | beta-lactamase                                 | 0.552 | 0.000 | 0.000 |
| AS94_12645 | hypothetical protein                           | 0.583 | 0.000 | 0.000 |
| AS94_12655 | transposase Tn554                              | 0.299 | 0.015 | 0.033 |
| AS94_12690 | membrane protein                               | 0.448 | 0.015 | 0.033 |
| AS94_12700 | membrane protein                               | 1.133 | 0.000 | 0.000 |
| AS94_12705 | antibiotic ABC transporter ATP-binding protein | 0.870 | 0.000 | 0.000 |
| AS94_12710 | membrane protein                               | 1.031 | 0.006 | 0.015 |
| AS94_12715 | sodium ABC transporter ATP-binding protein     | 1.381 | 0.000 | 0.000 |
| AS94_12720 | GntR family transcriptional regulator          | 1.258 | 0.000 | 0.000 |
| AS94_12740 | membrane protein                               | 0.367 | 0.016 | 0.035 |
| AS94_12755 | complement inhibitor                           | 1.320 | 0.000 | 0.000 |
| AS94_12760 | histidine kinase                               | 1.086 | 0.007 | 0.016 |
| AS94_12765 | peptidoglycan hydrolase                        | 0.537 | 0.001 | 0.004 |
| AS94_12770 | staphylokinase                                 | 0.499 | 0.024 | 0.050 |
| AS94_12845 | molecular chaperone GroEL                      | 0.417 | 0.001 | 0.004 |
| AS94_12850 | molecular chaperone GroES                      | 0.925 | 0.000 | 0.000 |
| AS94_12970 | dihydroxy-acid dehydratase                     | 1.727 | 0.000 | 0.000 |
| AS94_12975 | acetolactate synthase                          | 1.070 | 0.000 | 0.000 |
| AS94_12985 | ketol-acid reductoisomerase                    | 1.081 | 0.021 | 0.044 |
| AS94_13490 | peptidyl-prolyl cis-trans isomerase            | 2.758 | 0.000 | 0.000 |
| AS94_13500 | DNA double-strand break repair Rad50 ATPase    | 0.415 | 0.000 | 0.000 |

|            |                    |                                                |       |       |       |
|------------|--------------------|------------------------------------------------|-------|-------|-------|
| AS94_13505 |                    | DNA repair exonuclease                         | 0.451 | 0.000 | 0.001 |
| AS94_13540 |                    | fumarate hydratase                             | 0.323 | 0.013 | 0.029 |
| AS94_13575 |                    | amino acid ABC transporter ATP-binding protein | 4.322 | 0.000 | 0.000 |
| AS94_13580 |                    | glutamate ABC transporter permease             | 4.340 | 0.000 | 0.000 |
| AS94_12040 |                    | hypothetical protein                           | 1.352 | 0.014 | 0.031 |
| AS94_12055 |                    | autolysin                                      | 0.907 | 0.000 | 0.000 |
| AS94_12070 |                    | tail protein                                   | 1.010 | 0.000 | 0.000 |
| AS94_12075 |                    | cell wall hydrolase                            | 1.057 | 0.000 | 0.000 |
| AS94_12090 |                    | hypothetical protein                           | 1.351 | 0.009 | 0.020 |
| AS94_12095 |                    | hypothetical protein                           | 0.901 | 0.000 | 0.000 |
| AS94_12100 |                    | minor structural protein                       | 0.806 | 0.000 | 0.000 |
| AS94_12105 |                    | peptidase                                      | 1.095 | 0.000 | 0.000 |
| AS94_12110 |                    | phage tail protein                             | 1.205 | 0.000 | 0.000 |
| AS94_12115 |                    | membrane protein                               | 0.843 | 0.000 | 0.000 |
| AS94_12120 |                    | phi 11                                         | 1.235 | 0.001 | 0.002 |
| AS94_12125 |                    | hypothetical protein                           | 1.259 | 0.000 | 0.000 |
| AS94_12130 | φSA169             | tail protein                                   | 1.063 | 0.000 | 0.000 |
| AS94_12135 |                    | phi 11                                         | 1.024 | 0.003 | 0.006 |
| AS94_12140 |                    | hypothetical protein                           | 1.349 | 0.002 | 0.004 |
| AS94_12145 |                    | hypothetical protein                           | 1.717 | 0.001 | 0.002 |
| AS94_12150 |                    | phage head-tail adapter protein                | 1.569 | 0.000 | 0.000 |
| AS94_12155 |                    | phi 11                                         | 1.495 | 0.010 | 0.022 |
| AS94_12160 |                    | hypothetical protein                           | 1.100 | 0.000 | 0.000 |
| AS94_12165 |                    | phage capsid protein                           | 1.440 | 0.000 | 0.000 |
| AS94_12175 |                    | phage head morphogenesis protein               | 1.017 | 0.000 | 0.000 |
| AS94_12180 |                    | phage portal protein                           | 0.948 | 0.000 | 0.000 |
| AS94_12185 |                    | hypothetical protein                           | 1.121 | 0.000 | 0.000 |
| AS94_12190 |                    | terminase                                      | 0.929 | 0.000 | 0.000 |
| AS94_12345 |                    | BRO-like protein                               | 0.458 | 0.006 | 0.015 |
| AS94_12375 |                    | integrase                                      | 0.534 | 0.021 | 0.045 |
| AS94_13065 | mutual<br>prophage | hypothetical protein                           | 0.973 | 0.022 | 0.047 |
| AS94_13265 |                    | hypothetical protein                           | 5.182 | 0.000 | 0.000 |
| AS94_13280 |                    | hypothetical protein                           | 1.551 | 0.015 | 0.033 |

|            |                              |        |       |       |
|------------|------------------------------|--------|-------|-------|
| AS94_13290 | hypothetical protein         | 8.643  | 0.000 | 0.000 |
| AS94_13305 | DNA replication protein DnaC | 1.570  | 0.000 | 0.000 |
| AS94_13310 | replication protein          | 10.530 | 0.000 | 0.000 |
| AS94_13315 | hypothetical protein         | 9.973  | 0.000 | 0.000 |
| AS94_13395 | integrase                    | 1.071  | 0.000 | 0.000 |
