# Supplementary material for: Transcriptome Analyses of Prophage in Mediating Persistent Methicillin-Resistant Staphylococcus aureus Endovascular Infection
Source: MDPI journal article supplement (doi:10.3390/genes13091527), 2022-08-25
Supplement: s1 [file s1]

Table S7. Up-regulated DEGs in both 300-169 vs. 301-188 and 300-169 vs. 301-188::φSA169

| locus      | gene        | group      | product                                                    | agr-regulated<br>(Y) | sarA-regulated<br>(Y) | sigB-regulated<br>(Y) | 300-169 vs. 301-188            |         |       | 300-169 vs. 301-188::φSA169    |         |       |
|------------|-------------|------------|------------------------------------------------------------|----------------------|-----------------------|-----------------------|--------------------------------|---------|-------|--------------------------------|---------|-------|
|            |             |            |                                                            |                      |                       |                       | log <sub>2</sub> (fold change) | p value | p adj | log <sub>2</sub> (fold change) | p value | p adj |
| AS94_00015 |             |            | hypothetical protein                                       |                      |                       |                       | 0.979                          | 0.000   | 0.000 | 0.660                          | 0.003   | 0.007 |
| AS94_00025 |             |            | calcium-binding protein                                    |                      |                       |                       | 1.265                          | 0.000   | 0.000 | 1.736                          | 0.000   | 0.000 |
| AS94_00060 | <i>pckA</i> |            | phosphoenolpyruvate carboxykinase                          |                      | Y                     |                       | 0.596                          | 0.000   | 0.000 | 1.067                          | 0.000   | 0.000 |
| AS94_00150 |             |            | Diaminohydroxyphospho-<br>ribosylaminopyrimidine deaminase |                      |                       |                       | 1.209                          | 0.000   | 0.000 | 0.875                          | 0.000   | 0.000 |
| AS94_00155 | <i>ribD</i> |            | riboflavin synthase subunit alpha                          | Y                    |                       |                       | 0.838                          | 0.000   | 0.000 | 0.706                          | 0.001   | 0.002 |
| AS94_00160 | <i>ribE</i> |            | GTP cyclohydrolase                                         | Y                    |                       |                       | 0.831                          | 0.000   | 0.000 | 0.537                          | 0.001   | 0.002 |
| AS94_00170 | <i>ribA</i> |            | proline dehydrogenase                                      | Y                    |                       |                       | 0.863                          | 0.000   | 0.000 | 1.615                          | 0.000   | 0.000 |
| AS94_00175 |             |            | lysophospholipase                                          |                      |                       |                       | 0.575                          | 0.000   | 0.000 | 0.756                          | 0.000   | 0.000 |
| AS94_00180 | <i>rot</i>  |            | MarR family transcriptional regulator                      |                      |                       |                       | 0.666                          | 0.000   | 0.000 | 0.865                          | 0.000   | 0.000 |
| AS94_00275 |             |            | hypothetical protein                                       |                      |                       |                       | 1.099                          | 0.000   | 0.000 | 0.824                          | 0.000   | 0.000 |
| AS94_00280 |             |            | tRNA-binding protein                                       |                      |                       |                       | 1.274                          | 0.000   | 0.000 | 1.016                          | 0.000   | 0.000 |
| AS94_00285 |             |            | cell division protein FtsK                                 |                      |                       |                       | 1.122                          | 0.000   | 0.000 | 1.082                          | 0.000   | 0.000 |
| AS94_00290 | <i>murC</i> | host genes | UDP-N-acetylmuramate--alanine ligase                       |                      |                       | Y                     | 0.808                          | 0.000   | 0.000 | 0.757                          | 0.000   | 0.000 |
| AS94_00295 |             |            | hypothetical protein                                       |                      |                       |                       | 0.999                          | 0.000   | 0.000 | 0.733                          | 0.000   | 0.000 |
| AS94_00300 |             |            | smooth muscle caldesmon                                    |                      |                       |                       | 1.170                          | 0.000   | 0.000 | 1.244                          | 0.000   | 0.000 |
| AS94_00325 |             |            | acetyl-CoA synthetase                                      |                      |                       |                       | 0.516                          | 0.000   | 0.000 | 1.010                          | 0.000   | 0.000 |
| AS94_00330 | <i>fts</i>  |            | formate--tetrahydrofolate ligase                           |                      | Y                     |                       | 0.281                          | 0.017   | 0.036 | 0.454                          | 0.000   | 0.000 |
| AS94_00350 |             |            | serine protease                                            |                      |                       |                       | 1.256                          | 0.000   | 0.000 | 1.577                          | 0.000   | 0.000 |
| AS94_00390 | <i>rpsD</i> |            | 30S ribosomal protein S4                                   |                      |                       |                       | 0.617                          | 0.000   | 0.000 | 0.373                          | 0.001   | 0.002 |
| AS94_00430 | <i>ackA</i> |            | acetate kinase                                             |                      |                       |                       | 0.460                          | 0.000   | 0.000 | 0.426                          | 0.000   | 0.000 |
| AS94_00440 | <i>ald</i>  |            | alanine dehydrogenase                                      |                      |                       |                       | 0.595                          | 0.000   | 0.000 | 0.949                          | 0.000   | 0.000 |
| AS94_00530 | <i>phoP</i> |            | PhoP family transcriptional regulator                      |                      |                       |                       | 0.349                          | 0.024   | 0.049 | 0.419                          | 0.007   | 0.016 |
| AS94_00560 | <i>gap</i>  |            | glyceraldehyde-3-phosphate dehydrogenase                   |                      |                       |                       | 0.674                          | 0.000   | 0.000 | 1.143                          | 0.000   | 0.000 |
| AS94_00590 |             |            | translation initiation factor IF-3                         |                      |                       |                       | 1.200                          | 0.000   | 0.000 | 1.000                          | 0.000   | 0.000 |
| AS94_00595 | <i>rpmI</i> |            | 50S ribosomal protein L35                                  |                      |                       |                       | 1.376                          | 0.000   | 0.000 | 1.059                          | 0.000   | 0.000 |

|            |                  |                                                   |       |       |       |       |       |       |
|------------|------------------|---------------------------------------------------|-------|-------|-------|-------|-------|-------|
| AS94_00600 | <i>rplT</i>      | 50S ribosomal protein L20                         | 1.353 | 0.000 | 0.000 | 1.117 | 0.000 | 0.000 |
| AS94_00605 |                  | DNA mismatch repair protein MutT                  | 0.476 | 0.015 | 0.031 | 0.660 | 0.001 | 0.002 |
| AS94_00615 |                  | trigger factor                                    | 1.057 | 0.000 | 0.000 | 0.854 | 0.000 | 0.000 |
| AS94_00620 |                  | ATP-dependent protease                            | 0.740 | 0.000 | 0.000 | 0.503 | 0.000 | 0.000 |
| AS94_00625 |                  | GTP-binding protein YsxC                          | 0.620 | 0.002 | 0.004 | 0.661 | 0.001 | 0.002 |
| AS94_00630 | <i>hemA</i>      | glutamyl-tRNA reductase                           | 0.366 | 0.000 | 0.001 | 0.704 | 0.000 | 0.000 |
| AS94_00635 |                  | cytochrome C assembly protein                     | 0.707 | 0.000 | 0.000 | 0.951 | 0.000 | 0.000 |
| AS94_00640 | <i>hemC</i>      | porphobilinogen deaminase                         | 0.816 | 0.000 | 0.000 | 0.989 | 0.000 | 0.000 |
| AS94_00660 |                  | aminopeptidase                                    | 0.345 | 0.009 | 0.021 | 0.487 | 0.000 | 0.001 |
| AS94_00700 |                  | membrane protein                                  | 3.845 | 0.000 | 0.000 | 4.341 | 0.000 | 0.000 |
| AS94_00705 |                  | hypothetical protein                              | 4.743 | 0.000 | 0.000 | 4.081 | 0.000 | 0.000 |
| AS94_00710 |                  | rod shape-determining protein MreC                | 0.865 | 0.000 | 0.000 | 0.883 | 0.000 | 0.000 |
| AS94_00715 |                  | rod shape-determining protein MreD                | 0.839 | 0.000 | 0.000 | 0.811 | 0.000 | 0.000 |
| AS94_00760 |                  | queuine tRNA-ribosyltransferase                   | 0.546 | 0.000 | 0.000 | 0.340 | 0.006 | 0.014 |
| AS94_00815 |                  | hypothetical protein                              | 0.338 | 0.007 | 0.016 | 0.284 | 0.024 | 0.050 |
| AS94_00830 |                  | hypothetical protein                              | 1.817 | 0.000 | 0.000 | 1.334 | 0.000 | 0.000 |
| AS94_00910 |                  | allophanate hydrolase subunit 1                   | 2.559 | 0.000 | 0.000 | 2.336 | 0.000 | 0.000 |
| AS94_00915 |                  | allophanate hydrolase subunit 2                   | 2.558 | 0.000 | 0.000 | 2.139 | 0.000 | 0.000 |
| AS94_00920 | <i>rnfC</i>      | acetyl-CoA carboxylase                            | 2.132 | 0.000 | 0.000 | 1.965 | 0.000 | 0.000 |
| AS94_00925 |                  | acetyl-CoA carboxylase biotin carboxylase subunit | 2.006 | 0.000 | 0.000 | 2.097 | 0.000 | 0.000 |
| AS94_00930 | <i>lamB/YcsF</i> | hypothetical protein                              | 1.816 | 0.000 | 0.000 | 2.053 | 0.000 | 0.000 |
| AS94_00935 |                  | iron transporter                                  | 1.412 | 0.000 | 0.000 | 1.804 | 0.000 | 0.000 |
| AS94_00955 | <i>mtnN</i>      | S-adenosylhomocysteine nucleosidase               | 1.082 | 0.000 | 0.000 | 1.166 | 0.000 | 0.000 |
| AS94_00960 |                  | hypothetical protein                              | 1.271 | 0.000 | 0.000 | 1.194 | 0.000 | 0.000 |
| AS94_00965 |                  | GTPase                                            | 1.316 | 0.000 | 0.000 | 1.265 | 0.000 | 0.000 |
| AS94_00970 | <i>aroE</i>      | shikimate 5-dehydrogenase                         | 1.238 | 0.000 | 0.000 | 1.269 | 0.000 | 0.000 |
| AS94_00980 | <i>nadD</i>      | nicotinic acid mononucleotide adenylyltransferase | 1.237 | 0.000 | 0.000 | 1.241 | 0.000 | 0.000 |
| AS94_00985 |                  | HAD family hydrolase                              | 1.203 | 0.000 | 0.000 | 1.207 | 0.000 | 0.000 |

|            |             |                                                   |       |       |       |       |       |       |
|------------|-------------|---------------------------------------------------|-------|-------|-------|-------|-------|-------|
| AS94_00990 |             | Iojap family protein                              | 1.158 | 0.000 | 0.000 | 1.229 | 0.000 | 0.000 |
| AS94_00995 |             | methyltransferase                                 | 1.162 | 0.000 | 0.000 | 0.906 | 0.000 | 0.000 |
| AS94_01020 | <i>rpsT</i> | 30S ribosomal protein S20                         | 0.813 | 0.000 | 0.000 | 0.520 | 0.000 | 0.000 |
| AS94_01035 |             | HrcA family transcriptional regulator             | 0.382 | 0.003 | 0.007 | 0.522 | 0.000 | 0.000 |
| AS94_01040 |             | heat shock protein GrpE                           | 0.332 | 0.007 | 0.017 | 0.650 | 0.000 | 0.000 |
| AS94_01050 |             | molecular chaperone DnaJ                          | 0.880 | 0.000 | 0.000 | 0.961 | 0.000 | 0.000 |
| AS94_01055 |             | ribosomal protein L11 methyltransferase           | 1.069 | 0.000 | 0.000 | 1.068 | 0.000 | 0.000 |
| AS94_01060 |             | 16S rRNA methyltransferase                        | 0.938 | 0.000 | 0.000 | 0.843 | 0.000 | 0.000 |
| AS94_01070 | <i>rpsU</i> | 30S ribosomal protein S21                         | 0.750 | 0.000 | 0.000 | 0.488 | 0.001 | 0.003 |
| AS94_01075 |             | serine protease                                   | 0.726 | 0.000 | 0.000 | 0.870 | 0.000 | 0.000 |
| AS94_01080 |             | hypothetical protein                              | 0.434 | 0.000 | 0.001 | 0.458 | 0.000 | 0.000 |
| AS94_01085 |             | iron transporter                                  | 0.476 | 0.000 | 0.000 | 0.510 | 0.000 | 0.000 |
| AS94_01120 | <i>glyS</i> | glycyl-tRNA synthetase                            | 1.455 | 0.000 | 0.000 | 1.346 | 0.000 | 0.000 |
| AS94_01145 |             | SAM-dependent methyltransferase                   | 0.715 | 0.000 | 0.000 | 0.488 | 0.004 | 0.010 |
| AS94_01190 |             | penicillin-binding protein 3                      | 0.412 | 0.001 | 0.002 | 0.428 | 0.000 | 0.001 |
| AS94_01195 | <i>rpmG</i> | 50S ribosomal protein L33                         | 0.880 | 0.000 | 0.001 | 0.679 | 0.005 | 0.011 |
| AS94_01200 |             | 5-formyltetrahydrofolate cyclo-ligase             | 0.544 | 0.009 | 0.019 | 0.881 | 0.000 | 0.000 |
| AS94_01205 |             | membrane protein                                  | 0.761 | 0.000 | 0.000 | 0.926 | 0.000 | 0.000 |
| AS94_01215 |             | glucokinase                                       | 0.731 | 0.000 | 0.000 | 0.797 | 0.000 | 0.000 |
| AS94_01220 |             | hypothetical protein                              | 0.830 | 0.001 | 0.004 | 0.789 | 0.003 | 0.006 |
| AS94_01225 |             | hydroxyacylglutathione hydrolase                  | 0.715 | 0.000 | 0.000 | 0.588 | 0.000 | 0.000 |
| AS94_01305 |             | elongation factor P                               | 0.635 | 0.000 | 0.000 | 0.499 | 0.000 | 0.000 |
| AS94_01310 | <i>accB</i> | acetyl-CoA carboxylase                            | 0.851 | 0.000 | 0.000 | 0.721 | 0.000 | 0.000 |
| AS94_01315 | <i>accC</i> | acetyl-CoA carboxylase biotin carboxylase subunit | 0.847 | 0.000 | 0.000 | 0.754 | 0.000 | 0.000 |
| AS94_01320 |             | hypothetical protein                              | 0.790 | 0.000 | 0.000 | 0.689 | 0.000 | 0.000 |
| AS94_01325 |             | transcription antitermination protein NusB        | 0.587 | 0.001 | 0.002 | 0.624 | 0.000 | 0.001 |
| AS94_01330 | <i>xseA</i> | exodeoxyribonuclease VII large subunit            | 0.691 | 0.000 | 0.000 | 0.719 | 0.000 | 0.000 |
| AS94_01340 |             | geranyltranstransferase                           | 0.603 | 0.000 | 0.000 | 0.730 | 0.000 | 0.000 |
| AS94_01345 |             | arginine repressor ArgR                           | 1.174 | 0.000 | 0.000 | 1.479 | 0.000 | 0.000 |

|            |             |                                                                             |   |       |       |       |       |       |       |
|------------|-------------|-----------------------------------------------------------------------------|---|-------|-------|-------|-------|-------|-------|
| AS94_01350 |             | DNA repair protein RecN                                                     |   | 1.368 | 0.000 | 0.000 | 1.672 | 0.000 | 0.000 |
| AS94_01355 | <i>lpdA</i> | dihydrolipoamide dehydrogenase                                              |   | 0.664 | 0.000 | 0.000 | 0.839 | 0.000 | 0.000 |
| AS94_01375 |             | hypothetical protein                                                        |   | 0.830 | 0.000 | 0.000 | 0.615 | 0.001 | 0.002 |
| AS94_01380 |             | membrane protein                                                            |   | 0.676 | 0.000 | 0.000 | 0.468 | 0.001 | 0.004 |
| AS94_01485 | <i>srrA</i> | PhoP family transcriptional regulator                                       |   | 0.497 | 0.000 | 0.000 | 0.788 | 0.000 | 0.000 |
| AS94_01495 |             | hypothetical protein                                                        |   | 1.190 | 0.000 | 0.000 | 1.538 | 0.000 | 0.000 |
| AS94_01500 |             | hypothetical protein                                                        |   | 1.027 | 0.000 | 0.000 | 1.402 | 0.000 | 0.000 |
| AS94_01505 |             | hypothetical protein                                                        |   | 0.570 | 0.007 | 0.016 | 0.680 | 0.001 | 0.004 |
| AS94_01520 |             | hypothetical protein                                                        |   | 0.418 | 0.022 | 0.046 | 0.543 | 0.003 | 0.008 |
| AS94_01525 |             | ATP-dependent DNA helicase RecQ                                             |   | 0.465 | 0.003 | 0.007 | 0.528 | 0.001 | 0.002 |
| AS94_01530 |             | peptidoglycan-binding protein LysM                                          |   | 0.259 | 0.015 | 0.031 | 0.307 | 0.004 | 0.009 |
| AS94_01550 | <i>rpsA</i> | 30S ribosomal protein S1                                                    |   | 0.414 | 0.000 | 0.000 | 0.572 | 0.000 | 0.000 |
| AS94_01585 | <i>ndk</i>  | nucleoside diphosphate kinase                                               |   | 0.787 | 0.000 | 0.000 | 0.908 | 0.000 | 0.000 |
| AS94_01655 | <i>asnS</i> | asparaginyl-tRNA synthase                                                   |   | 0.561 | 0.000 | 0.000 | 0.647 | 0.000 | 0.000 |
| AS94_01675 |             | transglycosylase                                                            |   | 1.190 | 0.000 | 0.000 | 0.938 | 0.000 | 0.000 |
| AS94_01680 |             | recombinase RecU                                                            |   | 1.159 | 0.000 | 0.000 | 0.957 | 0.000 | 0.000 |
| AS94_01685 |             | hypothetical protein                                                        |   | 0.913 | 0.000 | 0.000 | 0.939 | 0.000 | 0.000 |
| AS94_01690 |             | hypothetical protein                                                        |   | 1.081 | 0.000 | 0.000 | 1.112 | 0.000 | 0.000 |
| AS94_01695 |             | cell cycle protein GpsB                                                     |   | 1.211 | 0.000 | 0.000 | 1.240 | 0.000 | 0.000 |
| AS94_01705 |             | RNA methyltransferase                                                       |   | 1.002 | 0.000 | 0.000 | 0.776 | 0.000 | 0.000 |
| AS94_01710 |             | hypothetical protein                                                        |   | 0.892 | 0.000 | 0.001 | 0.838 | 0.001 | 0.002 |
| AS94_01715 |             | sulfite reductase subunit alpha                                             |   | 1.860 | 0.000 | 0.000 | 1.736 | 0.000 | 0.000 |
| AS94_01720 |             | dynamain family protein                                                     |   | 0.696 | 0.000 | 0.000 | 0.862 | 0.000 | 0.000 |
| AS94_01785 | <i>thyA</i> | thymidylate synthase                                                        |   | 0.675 | 0.000 | 0.000 | 0.640 | 0.000 | 0.000 |
| AS94_01830 | <i>murG</i> | UDP-diphospho-muramoylpentapeptide<br>beta-N- acetylglucosaminyltransferase | Y | 0.617 | 0.000 | 0.000 | 0.716 | 0.000 | 0.000 |
| AS94_01835 |             | phosphatidic acid phosphatase                                               |   | 0.783 | 0.000 | 0.000 | 0.712 | 0.000 | 0.000 |
| AS94_01855 | <i>sucA</i> | 2-oxoglutarate dehydrogenase E1                                             |   | 0.400 | 0.000 | 0.000 | 0.749 | 0.000 | 0.000 |
| AS94_01860 | <i>sucB</i> | dihydrolipoamide succinyltransferase                                        |   | 0.266 | 0.012 | 0.026 | 0.503 | 0.000 | 0.000 |
| AS94_01890 |             | hypothetical protein                                                        |   | 0.760 | 0.000 | 0.000 | 0.510 | 0.005 | 0.012 |

|            |             |                                                         |   |       |       |       |       |       |       |
|------------|-------------|---------------------------------------------------------|---|-------|-------|-------|-------|-------|-------|
| AS94_01895 |             | nitric oxide reductase activation protein<br>NorD       |   | 0.444 | 0.001 | 0.002 | 0.440 | 0.001 | 0.002 |
| AS94_01905 |             | tellurite resistance protein TelA                       |   | 0.509 | 0.000 | 0.000 | 0.632 | 0.000 | 0.000 |
| AS94_01910 |             | 5-bromo-4-chloroindolyl phosphate<br>hydrolysis protein |   | 0.560 | 0.001 | 0.004 | 0.643 | 0.000 | 0.001 |
| AS94_01915 |             | acylphosphatase                                         |   | 0.727 | 0.000 | 0.001 | 0.711 | 0.000 | 0.001 |
| AS94_01970 | <i>asd</i>  | aspartate-semialdehyde dehydrogenase                    | Y | 0.689 | 0.007 | 0.017 | 0.788 | 0.002 | 0.006 |
| AS94_01975 |             | aspartate kinase                                        |   | 0.920 | 0.001 | 0.003 | 1.040 | 0.000 | 0.001 |
| AS94_01990 | <i>pstS</i> | thioredoxine reductase                                  |   | 1.098 | 0.007 | 0.016 | 1.610 | 0.000 | 0.000 |
| AS94_02120 |             | LytR family transcriptional regulator                   |   | 1.111 | 0.000 | 0.000 | 0.923 | 0.000 | 0.000 |
| AS94_02130 | <i>mprF</i> | phosphatidylglycerol lysyltransferase                   |   | 0.502 | 0.000 | 0.000 | 0.491 | 0.000 | 0.000 |
| AS94_02155 |             | DNA topoisomerase IV subunit A                          |   | 0.486 | 0.000 | 0.000 | 0.352 | 0.002 | 0.005 |
| AS94_02160 |             | DNA topoisomerase IV subunit B                          |   | 0.661 | 0.000 | 0.000 | 0.552 | 0.000 | 0.000 |
| AS94_02175 |             | 4-hydroxybenzoyl-CoA thioesterase                       |   | 0.549 | 0.000 | 0.000 | 0.518 | 0.000 | 0.000 |
| AS94_02180 | <i>acnA</i> | aconitate hydratase                                     |   | 0.769 | 0.000 | 0.000 | 0.738 | 0.000 | 0.000 |
| AS94_02185 |             | choline transporter                                     |   | 0.898 | 0.000 | 0.000 | 0.664 | 0.000 | 0.000 |
| AS94_02240 |             | secretion protein                                       |   | 0.922 | 0.000 | 0.000 | 0.883 | 0.000 | 0.000 |
| AS94_02245 | <i>guaC</i> | guanosine 5'-monophosphate<br>oxidoreductase            |   | 1.619 | 0.000 | 0.000 | 1.455 | 0.000 | 0.000 |
| AS94_02275 |             | HAD family hydrolase                                    |   | 0.310 | 0.014 | 0.029 | 0.367 | 0.004 | 0.009 |
| AS94_02280 |             | homoserine kinase                                       |   | 0.840 | 0.000 | 0.000 | 0.931 | 0.000 | 0.000 |
| AS94_02285 | <i>thrB</i> | threonine synthase                                      | Y | 0.453 | 0.001 | 0.004 | 0.589 | 0.000 | 0.000 |
| AS94_02290 | <i>thrC</i> | homoserine dehydrogenase                                | Y | 0.629 | 0.000 | 0.000 | 1.028 | 0.000 | 0.000 |
| AS94_02295 |             | aspartate kinase                                        |   | 1.302 | 0.000 | 0.000 | 1.786 | 0.000 | 0.000 |
| AS94_02300 |             | hypothetical protein                                    |   | 0.713 | 0.000 | 0.001 | 0.735 | 0.000 | 0.001 |
| AS94_02560 | <i>mutL</i> | DNA mismatch repair protein MutL                        | Y | 0.448 | 0.000 | 0.001 | 0.631 | 0.000 | 0.000 |
| AS94_02565 | <i>mutS</i> | DNA mismatch repair protein MutS                        | Y | 0.538 | 0.000 | 0.000 | 0.494 | 0.000 | 0.000 |
| AS94_02635 |             | hypothetical protein                                    |   | 0.311 | 0.023 | 0.046 | 0.424 | 0.002 | 0.005 |
| AS94_02645 |             | zinc protease                                           |   | 0.461 | 0.003 | 0.007 | 0.371 | 0.016 | 0.036 |
| AS94_02675 | <i>rpsO</i> | 30S ribosomal protein S15                               |   | 0.598 | 0.000 | 0.000 | 0.308 | 0.004 | 0.009 |
| AS94_02685 |             | tRNA pseudouridine synthase B                           |   | 0.498 | 0.006 | 0.014 | 0.497 | 0.006 | 0.015 |

|            |             |                                            |   |       |       |       |       |       |       |
|------------|-------------|--------------------------------------------|---|-------|-------|-------|-------|-------|-------|
| AS94_02700 |             | 50S ribosomal protein L7                   |   | 0.404 | 0.021 | 0.043 | 0.624 | 0.000 | 0.001 |
| AS94_02710 |             | transcription elongation factor NusA       |   | 0.535 | 0.000 | 0.000 | 0.691 | 0.000 | 0.000 |
| AS94_02715 |             | ribosome maturation protein RimP           |   | 0.588 | 0.000 | 0.000 | 0.884 | 0.000 | 0.000 |
| AS94_02725 | <i>proS</i> | prolyl-tRNA synthetase                     |   | 0.658 | 0.000 | 0.000 | 0.509 | 0.000 | 0.000 |
| AS94_02730 |             | zinc metalloprotease                       |   | 0.744 | 0.000 | 0.000 | 0.662 | 0.000 | 0.000 |
| AS94_02735 |             | phosphatidate cytidyltransferase           |   | 0.544 | 0.000 | 0.000 | 0.535 | 0.000 | 0.001 |
| AS94_02740 | <i>uppS</i> | UDP pyrophosphate synthase                 |   | 0.939 | 0.000 | 0.000 | 0.891 | 0.000 | 0.000 |
| AS94_02755 |             | elongation factor Ts                       |   | 1.044 | 0.000 | 0.000 | 1.115 | 0.000 | 0.000 |
| AS94_02760 | <i>rpsB</i> | 30S ribosomal protein S2                   |   | 1.301 | 0.000 | 0.000 | 1.029 | 0.000 | 0.000 |
| AS94_02765 |             | transcriptional regulator                  |   | 0.812 | 0.000 | 0.000 | 0.678 | 0.000 | 0.000 |
| AS94_02770 |             | ATP-dependent protease                     |   | 0.999 | 0.000 | 0.000 | 1.064 | 0.000 | 0.000 |
| AS94_02775 |             | ATP-dependent protease                     |   | 1.002 | 0.000 | 0.000 | 1.054 | 0.000 | 0.000 |
| AS94_02780 |             | tyrosine recombinase XerC                  |   | 1.153 | 0.000 | 0.000 | 1.247 | 0.000 | 0.000 |
| AS94_02785 |             | tRNA (uracil-5-)-methyltransferase         |   | 0.658 | 0.000 | 0.000 | 0.500 | 0.000 | 0.000 |
| AS94_02790 |             | DNA topoisomerase I                        |   | 0.853 | 0.000 | 0.000 | 0.542 | 0.000 | 0.000 |
| AS94_02815 | <i>sucD</i> | succinyl-CoA synthetase subunit alpha      |   | 0.794 | 0.000 | 0.000 | 0.905 | 0.000 | 0.000 |
| AS94_02820 | <i>sucC</i> | malate--CoA ligase subunit beta            | Y | 1.079 | 0.000 | 0.000 | 1.209 | 0.000 | 0.000 |
| AS94_02845 | <i>rplS</i> | 50S ribosomal protein L19                  |   | 0.873 | 0.000 | 0.000 | 0.613 | 0.000 | 0.000 |
| AS94_02880 |             | chromosome segregation protein SMC         |   | 0.313 | 0.008 | 0.017 | 0.423 | 0.000 | 0.001 |
| AS94_02890 | <i>acpP</i> | acyl carrier protein                       |   | 0.624 | 0.000 | 0.000 | 0.341 | 0.018 | 0.038 |
| AS94_02905 | <i>plsX</i> | phosphate acyltransferase                  |   | 0.676 | 0.000 | 0.000 | 0.597 | 0.000 | 0.000 |
| AS94_02910 |             | transcription factor                       |   | 0.920 | 0.000 | 0.000 | 0.953 | 0.000 | 0.000 |
| AS94_02920 |             | hypothetical protein                       |   | 0.820 | 0.000 | 0.000 | 0.695 | 0.000 | 0.000 |
| AS94_02925 |             | hypothetical protein                       |   | 0.454 | 0.001 | 0.004 | 0.375 | 0.008 | 0.019 |
| AS94_02945 | <i>rsgA</i> | CTPase                                     |   | 0.416 | 0.005 | 0.013 | 0.476 | 0.002 | 0.004 |
| AS94_03015 |             | 3-demethylubiquinone-9 3-methyltransferase |   | 0.446 | 0.004 | 0.009 | 0.586 | 0.000 | 0.000 |
| AS94_03025 | <i>pyrE</i> | orotate phosphoribosyltransferase          |   | 1.225 | 0.000 | 0.000 | 1.077 | 0.000 | 0.000 |
| AS94_03030 | <i>pyrF</i> | orotidine 5'-phosphate decarboxylase       |   | 1.430 | 0.000 | 0.000 | 1.367 | 0.000 | 0.000 |

|            |              |                                                                 |   |       |       |       |       |       |       |
|------------|--------------|-----------------------------------------------------------------|---|-------|-------|-------|-------|-------|-------|
| AS94_03035 | <i>carB</i>  | carbamoyl phosphate synthase large subunit                      |   | 1.017 | 0.000 | 0.000 | 1.053 | 0.000 | 0.000 |
| AS94_03040 | <i>carA</i>  | carbamoyl phosphate synthase small subunit                      | Y | 0.724 | 0.001 | 0.002 | 0.581 | 0.006 | 0.014 |
| AS94_03115 |              | cell division protein FtsZ                                      |   | 0.639 | 0.000 | 0.000 | 0.604 | 0.000 | 0.000 |
| AS94_03120 |              | cell division protein FtsA                                      |   | 0.745 | 0.000 | 0.000 | 0.822 | 0.000 | 0.000 |
| AS94_03125 |              | cell division protein FtsQ                                      |   | 0.878 | 0.000 | 0.000 | 0.928 | 0.000 | 0.000 |
| AS94_03130 | <i>murD</i>  | UDP-N-acetylmuramoyl-L-alanyl-D-glutamate synthetase            | Y | 0.874 | 0.000 | 0.000 | 0.934 | 0.000 | 0.000 |
| AS94_03135 | <i>mraY</i>  | phospho-N-acetylmuramoyl-pentapeptide-transferase               |   | 0.862 | 0.000 | 0.000 | 0.826 | 0.000 | 0.000 |
| AS94_03140 |              | penicillin-binding protein 1                                    |   | 1.055 | 0.000 | 0.000 | 1.170 | 0.000 | 0.000 |
| AS94_03145 |              | cell division protein FtsL                                      |   | 0.851 | 0.000 | 0.000 | 0.888 | 0.000 | 0.000 |
| AS94_03150 |              | 16S rRNA methyltransferase                                      |   | 1.112 | 0.000 | 0.000 | 1.212 | 0.000 | 0.000 |
| AS94_03155 |              | cell division protein MraZ                                      |   | 1.223 | 0.000 | 0.000 | 1.280 | 0.000 | 0.000 |
| AS94_03165 |              | hypothetical protein                                            |   | 0.912 | 0.000 | 0.000 | 1.215 | 0.000 | 0.000 |
| AS94_03175 |              | hypothetical protein                                            |   | 1.653 | 0.000 | 0.001 | 1.307 | 0.003 | 0.007 |
| AS94_03180 |              | hypothetical protein                                            |   | 1.556 | 0.001 | 0.003 | 1.479 | 0.002 | 0.005 |
| AS94_03195 |              | ethanolamine utilization protein EutQ                           |   | 0.891 | 0.000 | 0.000 | 1.162 | 0.000 | 0.000 |
| AS94_03245 |              | leukocidin/Hemolysin toxin family protein                       |   | 2.663 | 0.000 | 0.000 | 3.250 | 0.000 | 0.000 |
| AS94_03310 | <i>sdhA</i>  | succinate dehydrogenase flavoprotein subunit                    |   | 0.483 | 0.000 | 0.001 | 0.464 | 0.001 | 0.002 |
| AS94_03315 | <i>sdhC</i>  | succinate dehydrogenase cytochrome B558                         |   | 0.552 | 0.000 | 0.000 | 0.894 | 0.000 | 0.000 |
| AS94_03330 | <i>mutS2</i> | DNA mismatch repair protein MutS                                | Y | 0.661 | 0.000 | 0.000 | 0.697 | 0.000 | 0.000 |
| AS94_03335 |              | DNA polymerase                                                  |   | 0.684 | 0.000 | 0.000 | 0.666 | 0.000 | 0.000 |
| AS94_03460 |              | membrane protein                                                |   | 0.330 | 0.012 | 0.025 | 0.796 | 0.000 | 0.000 |
| AS94_03465 | <i>cyoE</i>  | protoheme IX farnesyltransferase                                |   | 0.489 | 0.000 | 0.000 | 0.918 | 0.000 | 0.000 |
| AS94_03470 | <i>ctaA</i>  | heme A synthase                                                 |   | 0.634 | 0.000 | 0.000 | 1.041 | 0.000 | 0.000 |
| AS94_03495 |              | GTP-binding protein                                             |   | 0.801 | 0.000 | 0.000 | 0.529 | 0.000 | 0.000 |
| AS94_03530 |              | spermidine/putrescine ABC transporter substrate-binding protein |   | 0.732 | 0.000 | 0.000 | 0.755 | 0.000 | 0.000 |
| AS94_03600 |              | potassium transporter Trk                                       |   | 0.917 | 0.000 | 0.000 | 0.799 | 0.000 | 0.000 |
| AS94_03605 |              | cytochrome D ubiquinol oxidase subunit II                       |   | 2.267 | 0.000 | 0.000 | 2.006 | 0.000 | 0.000 |
| AS94_03610 |              | cytochrome D ubiquinol oxidase subunit I                        |   | 2.164 | 0.000 | 0.000 | 2.035 | 0.000 | 0.000 |

|            |             |                                                   |   |       |       |       |       |       |       |
|------------|-------------|---------------------------------------------------|---|-------|-------|-------|-------|-------|-------|
| AS94_03620 | <i>ptsI</i> | phosphoenolpyruvate-protein phosphotransferase    |   | 0.790 | 0.000 | 0.000 | 0.676 | 0.000 | 0.000 |
| AS94_03625 | <i>ptsH</i> | phosphocarrier protein HPr                        |   | 0.650 | 0.000 | 0.000 | 0.818 | 0.000 | 0.000 |
| AS94_03630 |             | hypothetical protein                              |   | 0.791 | 0.000 | 0.000 | 0.659 | 0.000 | 0.000 |
| AS94_03640 |             | membrane protein                                  |   | 0.810 | 0.000 | 0.000 | 0.657 | 0.000 | 0.000 |
| AS94_03665 | <i>purD</i> | phosphoribosylamine--glycine ligase               |   | 0.763 | 0.000 | 0.000 | 0.727 | 0.000 | 0.000 |
| AS94_03670 | <i>purH</i> | purine biosynthesis protein purH                  |   | 1.316 | 0.000 | 0.000 | 1.399 | 0.000 | 0.000 |
| AS94_03675 | <i>purN</i> | phosphoribosylglycinamide formyltransferase       |   | 1.580 | 0.000 | 0.000 | 1.815 | 0.000 | 0.000 |
| AS94_03680 | <i>purM</i> | phosphoribosylaminoimidazole synthetase           |   | 1.747 | 0.000 | 0.000 | 1.666 | 0.000 | 0.000 |
| AS94_03685 | <i>purF</i> | amidophosphoribosyltransferase                    |   | 1.476 | 0.000 | 0.000 | 1.530 | 0.000 | 0.000 |
| AS94_03690 | <i>purL</i> | phosphoribosylformylglycinamide synthase          |   | 1.275 | 0.000 | 0.000 | 1.235 | 0.000 | 0.000 |
| AS94_03695 | <i>purQ</i> | phosphoribosylformylglycinamide synthase          | Y | 1.063 | 0.000 | 0.001 | 0.766 | 0.007 | 0.016 |
| AS94_03710 | <i>purK</i> | phosphoribosylaminoimidazole carboxylase          | Y | 1.272 | 0.000 | 0.000 | 0.802 | 0.002 | 0.006 |
| AS94_03720 | <i>folD</i> | tetrahydrofolate dehydrogenase                    | Y | 0.734 | 0.000 | 0.000 | 0.820 | 0.000 | 0.000 |
| AS94_03730 |             | chitinase                                         |   | 0.998 | 0.000 | 0.000 | 1.288 | 0.000 | 0.000 |
| AS94_03755 |             | methicillin resistance protein FmtA               |   | 1.096 | 0.000 | 0.000 | 0.938 | 0.000 | 0.000 |
| AS94_03885 |             | CAAX amino terminal protease                      |   | 0.972 | 0.000 | 0.000 | 0.522 | 0.004 | 0.009 |
| AS94_03965 |             | hypothetical protein                              |   | 0.692 | 0.000 | 0.000 | 0.913 | 0.000 | 0.000 |
| AS94_04055 | <i>trpS</i> | tryptophanyl-tRNA synthetase                      |   | 0.433 | 0.001 | 0.002 | 0.309 | 0.018 | 0.039 |
| AS94_04085 |             | peptide ABC transporter substrate-binding protein |   | 0.579 | 0.000 | 0.000 | 0.857 | 0.000 | 0.000 |
| AS94_04090 |             | peptide ABC transporter ATP-binding protein       |   | 0.747 | 0.000 | 0.001 | 0.781 | 0.000 | 0.001 |
| AS94_04095 |             | peptide ABC transporter ATP-binding protein       |   | 0.695 | 0.002 | 0.006 | 0.841 | 0.000 | 0.001 |
| AS94_04100 |             | peptide ABC transporter permease                  |   | 0.794 | 0.000 | 0.000 | 0.798 | 0.000 | 0.000 |
| AS94_04105 |             | peptide ABC transporter permease                  |   | 0.991 | 0.000 | 0.000 | 0.892 | 0.000 | 0.000 |
| AS94_04115 | <i>fabF</i> | 3-oxoacyl-ACP synthase                            | Y | 0.719 | 0.000 | 0.000 | 0.295 | 0.012 | 0.027 |
| AS94_04120 | <i>fabH</i> | 3-oxoacyl-ACP synthase                            | Y | 1.095 | 0.000 | 0.000 | 0.517 | 0.001 | 0.002 |
| AS94_04170 |             | hypothetical protein                              |   | 0.867 | 0.000 | 0.000 | 0.505 | 0.005 | 0.013 |
| AS94_04190 | <i>lepB</i> | signal peptidase IB                               |   | 1.090 | 0.000 | 0.000 | 1.066 | 0.000 | 0.000 |
| AS94_04195 | <i>lepB</i> | signal peptidase I                                |   | 1.056 | 0.000 | 0.000 | 1.031 | 0.000 | 0.000 |



|            |              |                                                      |   |   |       |       |       |       |       |       |
|------------|--------------|------------------------------------------------------|---|---|-------|-------|-------|-------|-------|-------|
| AS94_04200 |              | hypothetical protein                                 |   |   | 0.632 | 0.000 | 0.000 | 0.433 | 0.007 | 0.016 |
| AS94_04220 | <i>argG</i>  | argininosuccinate synthase                           | Y | Y | 6.222 | 0.000 | 0.000 | 6.152 | 0.000 | 0.000 |
| AS94_04225 | <i>argH</i>  | argininosuccinate lyase                              | Y | Y | 5.619 | 0.000 | 0.000 | 5.631 | 0.000 | 0.000 |
| AS94_04240 | <i>rocD</i>  | ornithine-oxoacid aminotransferase                   |   | Y | 0.351 | 0.001 | 0.003 | 0.680 | 0.000 | 0.000 |
| AS94_04320 |              | NADH dehydrogenase                                   |   |   | 0.899 | 0.000 | 0.000 | 0.734 | 0.000 | 0.000 |
| AS94_04350 | <i>dltD</i>  | D-alanyl-lipoteichoic acid biosynthesis protein DltD | Y |   | 0.797 | 0.000 | 0.000 | 0.752 | 0.000 | 0.000 |
| AS94_04360 | <i>dltB</i>  | D-alanyl transfer protein DltB                       | Y |   | 0.780 | 0.000 | 0.000 | 0.718 | 0.000 | 0.000 |
| AS94_04365 | <i>dltA</i>  | D-alanine--poly(phosphoribitol) ligase               | Y |   | 0.872 | 0.000 | 0.000 | 0.968 | 0.000 | 0.000 |
| AS94_04405 |              | 5'-nucleotidase                                      |   |   | 0.552 | 0.000 | 0.000 | 0.507 | 0.000 | 0.001 |
| AS94_04410 |              | membrane protein                                     |   |   | 0.580 | 0.002 | 0.005 | 0.513 | 0.006 | 0.015 |
| AS94_04450 |              | Fe-S cluster assembly protein SufD                   |   |   | 0.594 | 0.000 | 0.000 | 0.535 | 0.000 | 0.000 |
| AS94_04455 |              | iron ABC transporter ATP-binding protein             |   |   | 0.651 | 0.000 | 0.000 | 0.820 | 0.000 | 0.000 |
| AS94_04460 |              | hypothetical protein                                 |   |   | 0.945 | 0.000 | 0.000 | 0.824 | 0.000 | 0.000 |
| AS94_04485 |              | thioredoxin                                          |   |   | 0.846 | 0.000 | 0.000 | 0.494 | 0.023 | 0.049 |
| AS94_04490 |              | topoisomerase                                        |   |   | 0.640 | 0.002 | 0.005 | 0.653 | 0.002 | 0.004 |
| AS94_04540 |              | phosphoglycerate mutase                              |   |   | 1.008 | 0.000 | 0.000 | 0.940 | 0.000 | 0.000 |
| AS94_04550 |              | hypothetical protein                                 |   |   | 1.038 | 0.000 | 0.000 | 0.812 | 0.000 | 0.001 |
| AS94_04605 | <i>clfA</i>  | clumping factor A                                    | Y | Y | 0.877 | 0.000 | 0.000 | 0.694 | 0.000 | 0.000 |
| AS94_04635 | <i>entC3</i> | enterotoxin                                          |   |   | 0.311 | 0.004 | 0.010 | 0.775 | 0.000 | 0.000 |
| AS94_04655 |              | hypothetical protein                                 |   |   | 0.459 | 0.000 | 0.001 | 0.752 | 0.000 | 0.000 |
| AS94_04670 | <i>sdrC</i>  | hydrolase                                            | Y | Y | 1.617 | 0.000 | 0.000 | 1.770 | 0.000 | 0.000 |
| AS94_04725 |              | haloacid dehalogenase                                |   |   | 1.509 | 0.000 | 0.000 | 1.456 | 0.000 | 0.000 |
| AS94_04730 |              | glycine/betaine MFS transporter                      |   |   | 1.488 | 0.000 | 0.000 | 1.381 | 0.000 | 0.000 |
| AS94_04735 |              | long-chain fatty acid--CoA ligase                    |   |   | 4.180 | 0.000 | 0.000 | 3.781 | 0.000 | 0.000 |
| AS94_04740 |              | acetyl-CoA acetyltransferase                         |   |   | 2.242 | 0.000 | 0.000 | 2.229 | 0.000 | 0.000 |
| AS94_04745 |              | vraC                                                 |   |   | 1.973 | 0.001 | 0.002 | 3.127 | 0.000 | 0.000 |
| AS94_04750 |              | hypothetical protein                                 |   |   | 3.222 | 0.000 | 0.000 | 3.366 | 0.000 | 0.000 |
| AS94_04755 |              | vraX                                                 |   |   | 3.049 | 0.000 | 0.000 | 3.312 | 0.000 | 0.000 |
| AS94_04780 |              | amino acid permease                                  |   |   | 1.289 | 0.000 | 0.000 | 0.782 | 0.000 | 0.000 |

|            |              |                                                                     |   |       |       |       |       |       |       |
|------------|--------------|---------------------------------------------------------------------|---|-------|-------|-------|-------|-------|-------|
| AS94_04810 | <i>mk</i>    | mevalonate kinase                                                   | Y | 1.594 | 0.000 | 0.000 | 1.382 | 0.000 | 0.000 |
| AS94_04815 | <i>mvaD</i>  | diphosphomevalonate decarboxylase                                   | Y | 1.814 | 0.000 | 0.000 | 1.502 | 0.000 | 0.000 |
| AS94_04820 |              | phosphomevalonate kinase                                            |   | 1.673 | 0.000 | 0.000 | 1.298 | 0.000 | 0.000 |
| AS94_04840 |              | transposase                                                         |   | 0.710 | 0.000 | 0.000 | 0.745 | 0.000 | 0.000 |
| AS94_04865 |              | oxidoreductase ion channel protein IolS                             |   | 0.386 | 0.008 | 0.018 | 0.429 | 0.003 | 0.008 |
| AS94_04950 | <i>lysS</i>  | lysyl-tRNA synthetase                                               |   | 0.452 | 0.000 | 0.000 | 0.428 | 0.000 | 0.000 |
| AS94_04955 | <i>folK</i>  | 2-amino-4-hydroxy-6-hydroxymethyldihydropteridine pyrophosphokinase |   | 1.104 | 0.000 | 0.000 | 1.123 | 0.000 | 0.000 |
| AS94_04960 | <i>folB</i>  | dihydroneopterin aldolase                                           |   | 1.683 | 0.000 | 0.000 | 1.843 | 0.000 | 0.000 |
| AS94_04965 | <i>folP</i>  | dihydropteroate synthase                                            |   | 2.204 | 0.000 | 0.000 | 2.032 | 0.000 | 0.000 |
| AS94_04980 |              | zinc metalloprotease                                                |   | 0.610 | 0.000 | 0.000 | 0.368 | 0.000 | 0.001 |
| AS94_04985 | <i>hpt</i>   | hypoxanthine phosphoribosyltransferase                              |   | 0.524 | 0.000 | 0.001 | 0.367 | 0.009 | 0.022 |
| AS94_05140 |              | hypothetical protein                                                |   | 0.718 | 0.002 | 0.005 | 0.541 | 0.020 | 0.043 |
| AS94_05340 |              | replication initiation factor family protein                        |   | 2.706 | 0.013 | 0.028 | 3.139 | 0.004 | 0.010 |
| AS94_05345 |              | hypothetical protein                                                |   | 2.940 | 0.016 | 0.033 | 3.206 | 0.008 | 0.019 |
| AS94_05350 |              | hypothetical protein                                                |   | 3.020 | 0.014 | 0.031 | 3.347 | 0.007 | 0.016 |
| AS94_05355 |              | hypothetical protein                                                |   | 3.042 | 0.016 | 0.034 | 3.487 | 0.006 | 0.014 |
| AS94_05435 |              | integrase                                                           |   | 1.176 | 0.009 | 0.021 | 1.211 | 0.008 | 0.018 |
| AS94_05465 |              | hemolysin III                                                       |   | 0.562 | 0.000 | 0.000 | 0.763 | 0.000 | 0.000 |
| AS94_05470 |              | uridylyltransferase                                                 |   | 0.526 | 0.000 | 0.000 | 0.742 | 0.000 | 0.000 |
| AS94_05475 |              | membrane protein                                                    |   | 0.402 | 0.006 | 0.015 | 0.671 | 0.000 | 0.000 |
| AS94_05480 |              | hypothetical protein                                                |   | 0.399 | 0.001 | 0.002 | 0.698 | 0.000 | 0.000 |
| AS94_05485 |              | membrane protein                                                    |   | 2.663 | 0.000 | 0.000 | 2.482 | 0.000 | 0.000 |
| AS94_05525 | <i>asp23</i> | alkaline shock protein 23                                           |   | 1.326 | 0.000 | 0.000 | 1.013 | 0.000 | 0.000 |
| AS94_05530 |              | membrane protein                                                    |   | 0.988 | 0.000 | 0.000 | 0.845 | 0.000 | 0.000 |
| AS94_05535 |              | hypothetical protein                                                |   | 0.950 | 0.000 | 0.000 | 0.691 | 0.000 | 0.000 |
| AS94_05540 |              | glycine/betaine ABC transporter permease                            |   | 1.635 | 0.000 | 0.000 | 1.196 | 0.000 | 0.000 |
| AS94_05625 |              | hyaluronate lyase                                                   |   | 0.555 | 0.002 | 0.004 | 0.558 | 0.002 | 0.004 |
| AS94_05650 |              | toxin                                                               |   | 1.123 | 0.000 | 0.000 | 1.240 | 0.000 | 0.000 |

|            |             |                                                      |   |   |       |       |       |       |       |       |
|------------|-------------|------------------------------------------------------|---|---|-------|-------|-------|-------|-------|-------|
| AS94_05680 | <i>rpsI</i> | 30S ribosomal protein S9                             |   |   | 1.190 | 0.000 | 0.000 | 0.961 | 0.000 | 0.000 |
| AS94_05685 | <i>rplM</i> | 50S ribosomal protein L13                            |   |   | 1.212 | 0.000 | 0.000 | 1.063 | 0.000 | 0.000 |
| AS94_05785 | <i>rplE</i> | 50S ribosomal protein L5                             |   |   | 0.333 | 0.013 | 0.027 | 0.452 | 0.001 | 0.002 |
| AS94_05790 | <i>rplX</i> | 50S ribosomal protein L24                            |   |   | 0.436 | 0.002 | 0.005 | 0.643 | 0.000 | 0.000 |
| AS94_05800 | <i>rpsQ</i> | 30S ribosomal protein S17                            |   |   | 0.567 | 0.003 | 0.007 | 0.698 | 0.000 | 0.001 |
| AS94_05810 | <i>rplP</i> | 50S ribosomal protein L16                            |   |   | 0.513 | 0.000 | 0.001 | 0.540 | 0.000 | 0.000 |
| AS94_05815 | <i>rpsC</i> | 30S ribosomal protein S3                             |   |   | 0.501 | 0.000 | 0.001 | 0.601 | 0.000 | 0.000 |
| AS94_05820 | <i>rplV</i> | 50S ribosomal protein L22                            |   |   | 0.396 | 0.005 | 0.013 | 0.524 | 0.000 | 0.001 |
| AS94_05825 | <i>rpsS</i> | 30S ribosomal protein S19                            |   |   | 0.439 | 0.004 | 0.009 | 0.607 | 0.000 | 0.000 |
| AS94_05830 | <i>rplB</i> | 50S ribosomal protein L2                             |   |   | 0.464 | 0.000 | 0.001 | 0.452 | 0.000 | 0.001 |
| AS94_05840 | <i>rplD</i> | 50S ribosomal protein L4                             |   |   | 0.427 | 0.001 | 0.003 | 0.377 | 0.004 | 0.010 |
| AS94_05845 | <i>rplC</i> | 50S ribosomal protein L3                             |   |   | 0.615 | 0.000 | 0.000 | 0.609 | 0.000 | 0.000 |
| AS94_05850 | <i>rpsJ</i> | 30S ribosomal protein S10                            |   |   | 0.939 | 0.000 | 0.000 | 0.723 | 0.000 | 0.000 |
| AS94_06080 |             | hypothetical protein                                 |   |   | 1.519 | 0.000 | 0.000 | 0.859 | 0.000 | 0.000 |
| AS94_06085 |             | sodium:proton antiporter                             |   |   | 0.882 | 0.000 | 0.000 | 0.517 | 0.000 | 0.001 |
| AS94_06145 |             | LytR family transcriptional regulator                |   |   | 0.714 | 0.000 | 0.000 | 0.788 | 0.000 | 0.000 |
| AS94_06170 |             | RpiR family transcriptional regulator                |   |   | 0.363 | 0.006 | 0.014 | 0.335 | 0.011 | 0.025 |
| AS94_06205 |             | hypothetical protein                                 |   |   | 2.047 | 0.000 | 0.000 | 1.951 | 0.000 | 0.000 |
| AS94_06245 | <i>hutI</i> | imidazolonepropionase                                |   | Y | 2.049 | 0.000 | 0.000 | 2.024 | 0.000 | 0.000 |
| AS94_06250 | <i>hutU</i> | urocanate hydratase                                  | Y | Y | 1.987 | 0.000 | 0.000 | 2.078 | 0.000 | 0.000 |
| AS94_06300 |             | hypothetical protein                                 |   |   | 0.877 | 0.000 | 0.000 | 1.044 | 0.000 | 0.000 |
| AS94_06310 |             | sodium:glutamate symporter                           |   |   | 1.092 | 0.000 | 0.000 | 0.613 | 0.000 | 0.000 |
| AS94_06325 |             | 3-hydroxyacyl-CoA dehydrogenase                      |   |   | 0.555 | 0.014 | 0.030 | 0.582 | 0.010 | 0.023 |
| AS94_06365 |             | membrane protein                                     |   |   | 1.854 | 0.000 | 0.000 | 1.731 | 0.000 | 0.000 |
| AS94_06425 | <i>mgo</i>  | malate:quinone oxidoreductase                        |   |   | 0.620 | 0.000 | 0.000 | 0.872 | 0.000 | 0.000 |
| AS94_06450 |             | quinone oxidoreductase                               |   |   | 0.523 | 0.000 | 0.001 | 0.365 | 0.010 | 0.023 |
| AS94_06655 |             | amino acid ABC transporter substrate-binding protein |   |   | 0.566 | 0.000 | 0.000 | 0.523 | 0.000 | 0.001 |
| AS94_06670 | <i>gpmA</i> | phosphoglyceromutase                                 |   |   | 0.512 | 0.000 | 0.000 | 0.821 | 0.000 | 0.000 |
| AS94_06680 | <i>sbi</i>  | hypothetical protein                                 | Y | Y | 1.422 | 0.000 | 0.000 | 1.886 | 0.000 | 0.000 |

|            |              |                                                  |   |   |        |       |       |        |       |       |
|------------|--------------|--------------------------------------------------|---|---|--------|-------|-------|--------|-------|-------|
| AS94_06685 | <i>hlgA</i>  | gamma-hemolysin subunit A                        |   |   | 0.618  | 0.005 | 0.011 | 0.956  | 0.000 | 0.000 |
| AS94_06755 |              | glycerate kinase                                 |   |   | 1.650  | 0.000 | 0.000 | 1.762  | 0.000 | 0.000 |
| AS94_06760 |              | membrane protein                                 |   |   | 1.748  | 0.000 | 0.000 | 1.999  | 0.000 | 0.000 |
| AS94_06770 |              | transcriptional regulator                        |   |   | 1.261  | 0.000 | 0.000 | 1.084  | 0.001 | 0.002 |
| AS94_06855 |              | chloramphenicol resistance protein DHA1          |   |   | 0.710  | 0.000 | 0.001 | 0.578  | 0.002 | 0.006 |
| AS94_06940 |              | short-chain dehydrogenase                        |   |   | 0.676  | 0.000 | 0.000 | 0.425  | 0.001 | 0.003 |
| AS94_06945 |              | aminobenzoyl-glutamate transporter               |   |   | 1.029  | 0.000 | 0.000 | 1.048  | 0.000 | 0.000 |
| AS94_07095 |              | membrane protein                                 |   |   | 0.710  | 0.000 | 0.000 | 0.345  | 0.015 | 0.032 |
| AS94_07100 |              | glucarate transporter                            |   |   | 0.367  | 0.019 | 0.040 | 0.578  | 0.000 | 0.001 |
| AS94_07190 | <i>sdaAA</i> | serine dehydratase subunit alpha                 | Y |   | 1.350  | 0.000 | 0.000 | 1.378  | 0.000 | 0.000 |
| AS94_07195 | <i>sdaAB</i> | serine dehydratase                               | Y |   | 1.304  | 0.000 | 0.000 | 1.527  | 0.000 | 0.000 |
| AS94_07200 |              | transcriptional regulator                        |   |   | 1.123  | 0.000 | 0.000 | 1.288  | 0.000 | 0.000 |
| AS94_07270 |              | hydroxymethylglutaryl-CoA synthase               |   |   | 1.456  | 0.000 | 0.000 | 1.378  | 0.000 | 0.000 |
| AS94_07280 |              | Clp protease ATP-binding protein                 |   |   | 1.513  | 0.000 | 0.000 | 1.294  | 0.000 | 0.000 |
| AS94_07310 |              | 1-pyrroline-5-carboxylate dehydrogenase          |   |   | 0.884  | 0.000 | 0.000 | 1.261  | 0.000 | 0.000 |
| AS94_07320 |              | hypothetical protein                             |   |   | 3.453  | 0.000 | 0.000 | 4.145  | 0.000 | 0.000 |
| AS94_07350 | <i>crtM</i>  | dehydrosqualene synthase                         | Y | Y | 1.071  | 0.000 | 0.000 | 0.874  | 0.000 | 0.000 |
| AS94_07355 | <i>crtQ</i>  | 4_4'-diaponeurosporenoate<br>glycosyltransferase | Y | Y | 0.774  | 0.000 | 0.000 | 0.602  | 0.001 | 0.002 |
| AS94_07360 | <i>crtP</i>  | diapolycopene oxygenase                          |   | Y | 0.709  | 0.000 | 0.000 | 0.589  | 0.000 | 0.001 |
| AS94_07480 | <i>pyrD</i>  | dihydroorotate dehydrogenase                     |   |   | 0.910  | 0.000 | 0.000 | 0.991  | 0.000 | 0.000 |
| AS94_07540 |              | amino acid permease                              |   |   | 1.179  | 0.000 | 0.000 | 1.069  | 0.000 | 0.000 |
| AS94_07545 |              | 4-aminobutyrate aminotransferase                 |   |   | 1.004  | 0.003 | 0.007 | 1.378  | 0.000 | 0.000 |
| AS94_07745 |              | Replication and maintenance protein              |   |   | 14.571 | 0.000 | 0.000 | 14.474 | 0.000 | 0.000 |
| AS94_07750 |              | SAM-dependent methyltransferase                  |   |   | 15.751 | 0.000 | 0.000 | 15.654 | 0.000 | 0.000 |
| AS94_07835 | <i>sarA</i>  | transcriptional regulator                        |   |   | 0.785  | 0.000 | 0.000 | 0.621  | 0.000 | 0.000 |
| AS94_07855 |              | recombinase                                      |   |   | 0.844  | 0.000 | 0.001 | 0.542  | 0.015 | 0.033 |
| AS94_07860 |              | cation:proton antiporter                         |   |   | 1.176  | 0.000 | 0.000 | 0.930  | 0.000 | 0.000 |
| AS94_07865 |              | cation:proton antiporter                         |   |   | 1.088  | 0.000 | 0.001 | 1.002  | 0.001 | 0.003 |
| AS94_07870 |              | cation:proton antiporter                         |   |   | 1.431  | 0.000 | 0.000 | 1.711  | 0.000 | 0.000 |

|            |              |                                                     |       |       |       |       |       |       |
|------------|--------------|-----------------------------------------------------|-------|-------|-------|-------|-------|-------|
| AS94_07875 |              | cation:proton antiporter                            | 1.387 | 0.000 | 0.000 | 1.466 | 0.000 | 0.000 |
| AS94_07880 |              | cation:proton antiporter                            | 1.154 | 0.002 | 0.006 | 1.602 | 0.000 | 0.000 |
| AS94_07890 |              | cation:proton antiporter                            | 1.142 | 0.000 | 0.000 | 1.534 | 0.000 | 0.000 |
| AS94_07900 |              | manganese ABC transporter substrate-binding protein | 0.683 | 0.000 | 0.000 | 1.328 | 0.000 | 0.000 |
| AS94_07905 | <i>fecCD</i> | membrane protein                                    | 0.545 | 0.000 | 0.000 | 1.233 | 0.000 | 0.000 |
| AS94_07910 |              | phosphonate ABC transporter ATP-binding protein     | 0.862 | 0.000 | 0.000 | 1.616 | 0.000 | 0.000 |
| AS94_07920 |              | membrane protein                                    | 1.800 | 0.000 | 0.000 | 1.875 | 0.000 | 0.000 |
| AS94_08150 |              | hypothetical protein                                | 0.818 | 0.000 | 0.000 | 0.884 | 0.000 | 0.000 |
| AS94_08155 | <i>uppP</i>  | UDP pyrophosphate phosphatase                       | 1.261 | 0.000 | 0.000 | 0.818 | 0.000 | 0.000 |
| AS94_08160 |              | cysteine ABC transporter ATP-binding protein        | 0.405 | 0.001 | 0.001 | 0.456 | 0.000 | 0.000 |
| AS94_08165 |              | cysteine ABC transporter ATP-binding protein        | 0.549 | 0.000 | 0.000 | 0.633 | 0.000 | 0.000 |
| AS94_08190 |              | membrane protein                                    | 0.539 | 0.000 | 0.000 | 0.854 | 0.000 | 0.000 |
| AS94_08215 |              | multidrug MFS transporter                           | 0.685 | 0.000 | 0.000 | 0.549 | 0.000 | 0.000 |
| AS94_08255 |              | glyoxal reductase                                   | 0.753 | 0.000 | 0.000 | 0.603 | 0.000 | 0.000 |
| AS94_08330 | <i>ltaS1</i> | glycerol phosphate lipoteichoic acid synthase       | 1.264 | 0.000 | 0.000 | 1.274 | 0.000 | 0.000 |
| AS94_08350 |              | ABC transporter permease                            | 0.530 | 0.000 | 0.000 | 0.345 | 0.006 | 0.015 |
| AS94_08375 |              | peptide ABC transporter permease                    | 0.279 | 0.020 | 0.042 | 0.447 | 0.000 | 0.001 |
| AS94_08470 |              | membrane protein                                    | 0.738 | 0.000 | 0.000 | 0.675 | 0.000 | 0.000 |
| AS94_08480 |              | hypothetical protein                                | 1.192 | 0.000 | 0.000 | 0.888 | 0.000 | 0.000 |
| AS94_08575 |              | hypothetical protein                                | 0.803 | 0.000 | 0.000 | 0.777 | 0.000 | 0.000 |
| AS94_08580 |              | sporulation protein                                 | 0.500 | 0.000 | 0.001 | 0.537 | 0.000 | 0.000 |
| AS94_08590 |              | ATP-dependent Clp protease proteolytic subunit      | 0.457 | 0.000 | 0.000 | 0.617 | 0.000 | 0.000 |
| AS94_08610 |              | hypothetical protein                                | 0.466 | 0.000 | 0.000 | 0.436 | 0.000 | 0.001 |
| AS94_08615 |              | transcriptional regulator                           | 0.486 | 0.000 | 0.000 | 0.515 | 0.000 | 0.000 |
| AS94_08675 |              | integrase                                           | 0.448 | 0.003 | 0.007 | 0.555 | 0.000 | 0.001 |
| AS94_08685 |              | hypothetical protein                                | 3.481 | 0.000 | 0.000 | 1.686 | 0.014 | 0.030 |
| AS94_08810 |              | NA                                                  | 1.493 | 0.000 | 0.000 | 1.507 | 0.000 | 0.000 |
| AS94_08960 | <i>cls</i>   | phospholipase D                                     | 0.656 | 0.000 | 0.000 | 0.564 | 0.000 | 0.000 |

|            |             |                                                                  |   |       |       |       |       |       |       |
|------------|-------------|------------------------------------------------------------------|---|-------|-------|-------|-------|-------|-------|
| AS94_08965 | <i>oxaA</i> | phosphohydrolase                                                 |   | 0.530 | 0.000 | 0.001 | 0.516 | 0.001 | 0.002 |
| AS94_08970 |             | membrane protein                                                 |   | 0.613 | 0.000 | 0.000 | 0.290 | 0.015 | 0.033 |
| AS94_09015 | <i>murA</i> | UDP-N-acetylglucosamine 1-carboxyvinyltransferase                | Y | 0.562 | 0.000 | 0.000 | 0.379 | 0.001 | 0.004 |
| AS94_09020 |             | membrane protein                                                 |   | 1.061 | 0.013 | 0.028 | 0.970 | 0.023 | 0.049 |
| AS94_09040 | <i>atpA</i> | F0F1 ATP synthase subunit alpha                                  |   | 0.694 | 0.000 | 0.000 | 0.654 | 0.000 | 0.000 |
| AS94_09045 | <i>atpH</i> | F0F1 ATP synthase subunit delta                                  |   | 0.533 | 0.000 | 0.000 | 0.627 | 0.000 | 0.000 |
| AS94_09050 | <i>atpF</i> | F0F1 ATP synthase subunit B                                      |   | 0.776 | 0.000 | 0.000 | 0.895 | 0.000 | 0.000 |
| AS94_09055 | <i>atpE</i> | F0F1 ATP synthase subunit C                                      |   | 0.318 | 0.021 | 0.042 | 0.383 | 0.005 | 0.013 |
| AS94_09060 | <i>atpB</i> | F0F1 ATP synthase subunit A                                      |   | 0.435 | 0.000 | 0.000 | 0.465 | 0.000 | 0.000 |
| AS94_09065 |             | ATP synthase                                                     |   | 0.419 | 0.006 | 0.013 | 0.592 | 0.000 | 0.000 |
| AS94_09070 |             | UDP-N-acetylglucosamine 2-epimerase                              |   | 0.710 | 0.000 | 0.000 | 0.854 | 0.000 | 0.000 |
| AS94_09075 | <i>upp</i>  | uracil phosphoribosyltransferase                                 |   | 0.716 | 0.000 | 0.000 | 0.793 | 0.000 | 0.000 |
| AS94_09080 | <i>glyA</i> | serine hydroxymethyltransferase                                  |   | 0.589 | 0.000 | 0.000 | 0.792 | 0.000 | 0.000 |
| AS94_09085 |             | hypothetical protein                                             |   | 0.661 | 0.000 | 0.000 | 0.872 | 0.000 | 0.000 |
| AS94_09100 |             | N5-glutamine S-adenosyl-L-methionine-dependent methyltransferase |   | 0.552 | 0.000 | 0.000 | 0.541 | 0.000 | 0.000 |
| AS94_09105 |             | peptide chain release factor 1                                   |   | 0.684 | 0.000 | 0.000 | 0.557 | 0.000 | 0.000 |
| AS94_09115 | <i>rpmE</i> | 50S ribosomal protein L31                                        |   | 0.378 | 0.002 | 0.006 | 0.289 | 0.020 | 0.044 |
| AS94_09150 | <i>pyrG</i> | CTP synthetase                                                   |   | 1.261 | 0.000 | 0.000 | 0.987 | 0.000 | 0.000 |
| AS94_09160 |             | acetyltransferase                                                |   | 1.323 | 0.000 | 0.000 | 0.884 | 0.000 | 0.000 |
| AS94_09165 | <i>coaA</i> | pantothenate kinase                                              |   | 0.898 | 0.000 | 0.000 | 0.645 | 0.001 | 0.003 |
| AS94_09240 |             | ArsR family transcriptional regulator                            |   | 1.854 | 0.000 | 0.000 | 1.904 | 0.000 | 0.000 |
| AS94_09245 |             | cation transporter                                               |   | 1.422 | 0.000 | 0.000 | 1.318 | 0.000 | 0.000 |
| AS94_09250 |             | lytic regulatory protein                                         |   | 0.641 | 0.000 | 0.000 | 0.743 | 0.000 | 0.000 |
| AS94_09275 | <i>mtlA</i> | PTS mannitol transporter subunit IIB                             | Y | 1.502 | 0.000 | 0.001 | 1.842 | 0.000 | 0.000 |
| AS94_09280 |             | PTS lactose transporter subunit IIB                              |   | 1.979 | 0.000 | 0.000 | 1.918 | 0.000 | 0.000 |
| AS94_09285 | <i>mtlF</i> | PTS mannitol transporter subunit IIA                             | Y | 1.613 | 0.000 | 0.000 | 1.500 | 0.000 | 0.000 |
| AS94_09290 | <i>mtlD</i> | mannitol-1-phosphate 5-dehydrogenase                             | Y | 1.814 | 0.000 | 0.000 | 1.509 | 0.000 | 0.000 |
| AS94_09315 | <i>rocF</i> | arginase                                                         |   | 0.803 | 0.000 | 0.000 | 0.880 | 0.000 | 0.000 |

|            |      |                                                    |   |   |       |       |       |       |       |       |
|------------|------|----------------------------------------------------|---|---|-------|-------|-------|-------|-------|-------|
| AS94_09450 |      | membrane protein                                   |   |   | 0.766 | 0.008 | 0.018 | 0.844 | 0.004 | 0.009 |
| AS94_09490 |      | surface protein                                    |   |   | 0.567 | 0.000 | 0.000 | 0.634 | 0.000 | 0.000 |
| AS94_09560 |      | capsular polysaccharide biosynthesis protein CapA  |   |   | 1.554 | 0.000 | 0.000 | 1.641 | 0.000 | 0.000 |
| AS94_09565 |      | capsular polysaccharide biosynthesis protein Cap5B |   |   | 1.706 | 0.000 | 0.000 | 1.808 | 0.000 | 0.000 |
| AS94_09570 |      | capsular polysaccharide biosynthesis protein Cap8C |   |   | 1.635 | 0.000 | 0.000 | 1.647 | 0.000 | 0.000 |
| AS94_09575 |      | polysaccharide biosynthesis protein EpsC           |   |   | 1.580 | 0.000 | 0.000 | 1.611 | 0.000 | 0.000 |
| AS94_09580 |      | UDP-glucose 4-epimerase                            |   |   | 1.728 | 0.000 | 0.000 | 1.840 | 0.000 | 0.000 |
| AS94_09585 |      | capsular polysaccharide biosynthesis protein Cap8F |   |   | 1.526 | 0.000 | 0.000 | 1.717 | 0.000 | 0.000 |
| AS94_09590 |      | UDP-N-acetylglucosamine 2-epimerase                |   |   | 1.646 | 0.000 | 0.000 | 1.877 | 0.000 | 0.000 |
| AS94_09595 |      | capsular polysaccharide biosynthesis protein       |   |   | 1.591 | 0.000 | 0.000 | 1.991 | 0.000 | 0.000 |
| AS94_09600 |      | capsular polysaccharide biosynthesis protein       |   |   | 1.343 | 0.000 | 0.000 | 1.620 | 0.000 | 0.000 |
| AS94_09605 |      | capsular polysaccharide biosynthesis protein       |   |   | 1.211 | 0.000 | 0.000 | 1.536 | 0.000 | 0.000 |
| AS94_09610 |      | capsular polysaccharide biosynthesis protein       |   |   | 0.896 | 0.001 | 0.001 | 1.070 | 0.000 | 0.000 |
| AS94_09615 |      | glycosyltransferase family 1                       |   |   | 0.556 | 0.000 | 0.001 | 0.774 | 0.000 | 0.000 |
| AS94_09630 | wecC | UDP-N-acetyl-D-mannosamine dehydrogenase           |   |   | 0.311 | 0.025 | 0.049 | 0.571 | 0.000 | 0.000 |
| AS94_09690 |      | multidrug MFS transporter                          |   |   | 0.882 | 0.000 | 0.000 | 1.144 | 0.000 | 0.000 |
| AS94_09755 |      | cellobiose operon outer surface protein            |   |   | 0.638 | 0.000 | 0.000 | 1.293 | 0.000 | 0.000 |
| AS94_09760 | murQ | N-acetylmuramic acid-6-phosphate etherase          | Y | Y | 0.578 | 0.000 | 0.000 | 1.205 | 0.000 | 0.000 |
| AS94_09765 |      | permease                                           |   |   | 0.676 | 0.000 | 0.000 | 1.432 | 0.000 | 0.000 |
| AS94_09770 |      | RpiR family transcriptional regulator              |   |   | 0.881 | 0.000 | 0.000 | 1.547 | 0.000 | 0.000 |
| AS94_09820 |      | peptidase M23                                      |   |   | 1.093 | 0.000 | 0.000 | 0.956 | 0.000 | 0.000 |
| AS94_09865 |      | antiporter                                         |   |   | 2.494 | 0.000 | 0.000 | 2.802 | 0.000 | 0.000 |
| AS94_09920 |      | 3-hydroxyacyl-CoA dehydrogenase                    |   |   | 0.879 | 0.001 | 0.001 | 1.118 | 0.000 | 0.000 |
| AS94_09925 |      | glutaryl-CoA dehydrogenase                         |   |   | 1.155 | 0.003 | 0.006 | 1.385 | 0.000 | 0.001 |
| AS94_09930 |      | long-chain fatty acid--CoA ligase                  |   |   | 1.533 | 0.000 | 0.000 | 1.974 | 0.000 | 0.000 |
| AS94_09935 |      | coenzyme A transferase                             |   |   | 1.762 | 0.000 | 0.000 | 2.050 | 0.000 | 0.000 |
| AS94_09955 |      | NmrA family protein                                |   |   | 2.177 | 0.000 | 0.000 | 2.065 | 0.000 | 0.000 |
| AS94_09960 |      | DeoR family transcriptional regulator              |   |   | 1.806 | 0.000 | 0.000 | 1.475 | 0.000 | 0.000 |

|            |              |                                                                           |   |       |       |       |       |       |       |
|------------|--------------|---------------------------------------------------------------------------|---|-------|-------|-------|-------|-------|-------|
| AS94_09985 |              | lactate dehydrogenase                                                     |   | 0.788 | 0.000 | 0.000 | 1.252 | 0.000 | 0.000 |
| AS94_09995 |              | inosine-uridine preferring nucleoside<br>hydrolase                        |   | 0.623 | 0.002 | 0.004 | 0.524 | 0.008 | 0.018 |
| AS94_10035 | <i>ispD1</i> | 2-C-methyl-D-erythritol 4-phosphate<br>cytidyltransferase                 |   | 0.982 | 0.000 | 0.000 | 0.961 | 0.000 | 0.000 |
| AS94_10040 |              | ribitol-5-phosphate dehydrogenase                                         |   | 0.721 | 0.001 | 0.002 | 0.720 | 0.001 | 0.003 |
| AS94_10045 |              | teichoic acid biosynthesis protein                                        |   | 0.748 | 0.000 | 0.000 | 0.961 | 0.000 | 0.000 |
| AS94_10050 |              | CDP-glycerol:glycerophosphate<br>glycerophosphotransferase                |   | 0.775 | 0.000 | 0.000 | 0.422 | 0.016 | 0.034 |
| AS94_10125 | <i>rbsK</i>  | ribokinase                                                                | Y | 2.808 | 0.000 | 0.000 | 3.000 | 0.000 | 0.000 |
| AS94_10130 | <i>rbsD</i>  | ribose pyranase                                                           | Y | 2.726 | 0.000 | 0.000 | 3.101 | 0.000 | 0.000 |
| AS94_10135 |              | ribose transporter RbsU                                                   |   | 2.853 | 0.000 | 0.000 | 3.014 | 0.000 | 0.000 |
| AS94_10200 |              | virulence factor EsxA                                                     |   | 0.390 | 0.001 | 0.002 | 0.490 | 0.000 | 0.000 |
| AS94_10205 |              | type VII secretion protein EsaA                                           |   | 0.914 | 0.000 | 0.000 | 0.886 | 0.000 | 0.000 |
| AS94_10220 |              | type VII secretion protein EssB                                           |   | 0.596 | 0.024 | 0.049 | 0.904 | 0.001 | 0.002 |
| AS94_10315 |              | hypothetical protein                                                      |   | 0.745 | 0.000 | 0.001 | 0.863 | 0.000 | 0.000 |
| AS94_10325 |              | branched-chain amino acid transporter II<br>carrierprotein                |   | 0.968 | 0.000 | 0.000 | 0.668 | 0.000 | 0.000 |
| AS94_10390 |              | histidine transporter                                                     |   | 2.081 | 0.000 | 0.000 | 2.250 | 0.000 | 0.000 |
| AS94_10395 | <i>lip2</i>  | lipase                                                                    | Y | 0.498 | 0.000 | 0.000 | 0.939 | 0.000 | 0.000 |
| AS94_10470 |              | sn-glycerol-3-phosphate transporter                                       |   | 1.821 | 0.000 | 0.000 | 1.983 | 0.000 | 0.000 |
| AS94_10555 | <i>thlA</i>  | acetyl-CoA acetyltransferase                                              |   | 0.837 | 0.000 | 0.000 | 0.778 | 0.000 | 0.000 |
| AS94_10565 | <i>metE</i>  | 5-methyltetrahydropteroyltriglutamate--<br>homocysteine methyltransferase | Y | 0.852 | 0.000 | 0.000 | 0.777 | 0.000 | 0.000 |
| AS94_10570 |              | 5_10-methylenetetrahydrofolate reductase                                  |   | 0.983 | 0.000 | 0.000 | 0.913 | 0.000 | 0.000 |
| AS94_10575 |              | cystathionine beta-lyase                                                  |   | 0.840 | 0.013 | 0.028 | 1.129 | 0.001 | 0.003 |
| AS94_10580 | <i>metB</i>  | cystathionine gamma-synthase                                              |   | 0.782 | 0.015 | 0.032 | 1.239 | 0.000 | 0.001 |
| AS94_10600 |              | GTP-binding protein YchF                                                  |   | 0.305 | 0.024 | 0.049 | 0.486 | 0.000 | 0.001 |
| AS94_10660 |              | peptidase                                                                 |   | 1.829 | 0.000 | 0.000 | 1.600 | 0.000 | 0.000 |
| AS94_10670 |              | membrane protein                                                          |   | 0.941 | 0.000 | 0.000 | 0.649 | 0.000 | 0.000 |
| AS94_10725 |              | hypothetical protein                                                      |   | 0.541 | 0.000 | 0.000 | 0.638 | 0.000 | 0.000 |
| AS94_10785 |              | growth inhibitor PemK                                                     |   | 0.719 | 0.000 | 0.000 | 0.716 | 0.000 | 0.000 |
| AS94_10800 |              | hypothetical protein                                                      |   | 0.786 | 0.000 | 0.000 | 1.022 | 0.000 | 0.000 |



|            |              |                                                              |   |       |       |       |       |       |       |
|------------|--------------|--------------------------------------------------------------|---|-------|-------|-------|-------|-------|-------|
| AS94_10935 |              | cobalamin synthesis protein CobW                             |   | 2.380 | 0.000 | 0.000 | 2.349 | 0.000 | 0.000 |
| AS94_10985 | <i>metN</i>  | methionine ABC transporter ATP-binding protein               | Y | 1.535 | 0.000 | 0.000 | 1.379 | 0.000 | 0.000 |
| AS94_11070 |              | acetyltransferase                                            |   | 0.620 | 0.009 | 0.019 | 0.671 | 0.005 | 0.011 |
| AS94_11170 |              | 16S rRNA methyltransferase                                   |   | 0.540 | 0.000 | 0.001 | 0.654 | 0.000 | 0.000 |
| AS94_11175 |              | tRNA uridine 5-carboxymethylaminomethyl modification protein |   | 0.569 | 0.000 | 0.000 | 0.622 | 0.000 | 0.000 |
| AS94_11180 |              | tRNA modification GTPase                                     |   | 0.481 | 0.000 | 0.001 | 0.465 | 0.001 | 0.002 |
| AS94_11185 |              | ribonuclease P                                               |   | 0.873 | 0.000 | 0.001 | 0.738 | 0.003 | 0.008 |
| AS94_11190 | <i>rpmH</i>  | 50S ribosomal protein L34                                    |   | 0.924 | 0.000 | 0.000 | 0.691 | 0.000 | 0.000 |
| AS94_11195 | <i>dnaA</i>  | chromosome replication protein DnaA                          |   | 0.548 | 0.000 | 0.000 | 0.676 | 0.000 | 0.000 |
| AS94_11200 | <i>dnaN</i>  | DNA polymerase III subunit beta                              |   | 0.635 | 0.000 | 0.000 | 0.677 | 0.000 | 0.000 |
| AS94_11210 | <i>recF</i>  | recombinase F                                                |   | 0.481 | 0.000 | 0.000 | 0.737 | 0.000 | 0.000 |
| AS94_11215 |              | DNA gyrase subunit B                                         |   | 0.557 | 0.000 | 0.000 | 0.798 | 0.000 | 0.000 |
| AS94_11220 |              | DNA topoisomerase IV subunit A                               |   | 0.725 | 0.000 | 0.000 | 0.757 | 0.000 | 0.000 |
| AS94_11230 | <i>hutH</i>  | histidine ammonia-lyase                                      | Y | 0.628 | 0.000 | 0.000 | 0.796 | 0.000 | 0.000 |
| AS94_11235 | <i>serS</i>  | seryl-tRNA synthetase                                        |   | 1.022 | 0.000 | 0.000 | 1.149 | 0.000 | 0.000 |
| AS94_11275 | <i>purA</i>  | adenylosuccinate synthetase                                  | Y | 2.591 | 0.000 | 0.000 | 2.120 | 0.000 | 0.000 |
| AS94_11320 |              | 50S rRNA methyltransferase                                   |   | 0.509 | 0.001 | 0.002 | 0.816 | 0.000 | 0.000 |
| AS94_11355 | <i>mecA</i>  | penicillin-binding protein                                   | Y | 0.635 | 0.000 | 0.000 | 0.836 | 0.000 | 0.000 |
| AS94_11360 | <i>mecR1</i> | methicillin resistance protein                               | Y | 0.415 | 0.006 | 0.014 | 0.420 | 0.005 | 0.013 |
| AS94_11430 |              | hydrolase                                                    |   | 2.561 | 0.000 | 0.000 | 2.577 | 0.000 | 0.000 |
| AS94_11470 |              | UDP-glucose 4-epimerase                                      |   | 0.795 | 0.000 | 0.000 | 1.274 | 0.000 | 0.000 |
| AS94_11485 |              | 2-amino-3-ketobutyrate CoA ligase                            |   | 0.544 | 0.000 | 0.000 | 0.753 | 0.000 | 0.000 |
| AS94_11530 |              | 16S rRNA methyltransferase                                   |   | 0.767 | 0.000 | 0.000 | 0.752 | 0.000 | 0.000 |
| AS94_11535 | <i>rplL</i>  | 50S ribosomal protein L7/L12                                 | Y | 0.976 | 0.000 | 0.000 | 0.922 | 0.000 | 0.000 |
| AS94_11540 | <i>rplJ</i>  | 50S ribosomal protein L10                                    | Y | 1.082 | 0.000 | 0.000 | 1.025 | 0.000 | 0.000 |
| AS94_11545 | <i>rplA</i>  | 50S ribosomal protein L1                                     |   | 1.176 | 0.000 | 0.000 | 0.948 | 0.000 | 0.000 |
| AS94_11550 | <i>rplK</i>  | 50S ribosomal protein L11                                    |   | 0.711 | 0.000 | 0.000 | 0.572 | 0.000 | 0.000 |
| AS94_11575 |              | hypothetical protein                                         |   | 0.417 | 0.015 | 0.031 | 0.637 | 0.000 | 0.001 |

|            |              |                                                |   |       |       |       |       |       |       |
|------------|--------------|------------------------------------------------|---|-------|-------|-------|-------|-------|-------|
| AS94_11610 |              | DNA repair protein RadA                        |   | 0.355 | 0.005 | 0.012 | 0.344 | 0.007 | 0.016 |
| AS94_11615 |              | ATP-dependent Clp protease ATP-binding protein |   | 0.396 | 0.000 | 0.000 | 0.477 | 0.000 | 0.000 |
| AS94_11665 |              | DNA damage-inducible protein DinB              |   | 0.614 | 0.000 | 0.001 | 0.399 | 0.021 | 0.045 |
| AS94_11680 |              | lactonase                                      |   | 0.993 | 0.000 | 0.000 | 1.005 | 0.000 | 0.000 |
| AS94_11740 | <i>lip</i>   | lipase                                         | Y | 1.297 | 0.000 | 0.000 | 1.830 | 0.000 | 0.000 |
| AS94_11765 |              | transcriptional regulator                      |   | 0.602 | 0.000 | 0.000 | 0.620 | 0.000 | 0.000 |
| AS94_11815 |              | hypothetical protein                           |   | 0.695 | 0.004 | 0.009 | 0.719 | 0.003 | 0.007 |
| AS94_11825 |              | flavin reductase                               |   | 0.795 | 0.001 | 0.002 | 0.948 | 0.000 | 0.000 |
| AS94_11855 | <i>secA2</i> | preprotein translocase subunit SecA            |   | 0.320 | 0.012 | 0.027 | 0.381 | 0.003 | 0.007 |
| AS94_11870 |              | surface anchored protein                       |   | 0.933 | 0.000 | 0.000 | 1.032 | 0.000 | 0.000 |
| AS94_11875 |              | isochorismatase hydrolase                      |   | 0.341 | 0.005 | 0.012 | 0.363 | 0.003 | 0.007 |
| AS94_11880 |              | N-acetylmuramoyl-L-alanine amidase             |   | 0.521 | 0.000 | 0.000 | 0.606 | 0.000 | 0.000 |
| AS94_11940 | <i>arcC</i>  | carbamate kinase                               | Y | 0.510 | 0.000 | 0.001 | 0.738 | 0.000 | 0.000 |
| AS94_11945 |              | Crp/Fnr family transcriptional regulator       |   | 0.580 | 0.000 | 0.000 | 0.736 | 0.000 | 0.000 |
| AS94_11985 |              | multidrug ABC transporter ATP-binding protein  |   | 0.925 | 0.000 | 0.000 | 0.508 | 0.000 | 0.000 |
| AS94_11990 |              | hypothetical protein                           |   | 0.695 | 0.000 | 0.000 | 0.619 | 0.000 | 0.000 |
| AS94_12020 |              | RecX family transcriptional regulator          |   | 0.925 | 0.000 | 0.000 | 0.815 | 0.000 | 0.000 |
| AS94_12025 | <i>mgt</i>   | glycosyltransferase                            |   | 2.944 | 0.000 | 0.000 | 2.930 | 0.000 | 0.000 |
| AS94_12030 |              | general stress protein                         |   | 0.703 | 0.000 | 0.000 | 0.329 | 0.002 | 0.006 |
| AS94_12410 |              | ribonuclease BN                                |   | 1.228 | 0.000 | 0.000 | 0.808 | 0.000 | 0.000 |
| AS94_12415 | <i>vraR</i>  | LuxR family transcriptional regulator          |   | 3.187 | 0.000 | 0.000 | 3.056 | 0.000 | 0.000 |
| AS94_12420 | <i>vraS</i>  | sensor histidine kinase                        |   | 3.380 | 0.000 | 0.000 | 3.494 | 0.000 | 0.000 |
| AS94_12425 |              | transporter                                    |   | 3.431 | 0.000 | 0.000 | 3.384 | 0.000 | 0.000 |
| AS94_12430 |              | hypothetical protein                           |   | 3.841 | 0.000 | 0.000 | 3.562 | 0.000 | 0.000 |
| AS94_12465 | <i>mur</i>   | UDP-N-acetylmuramate--alanine ligase           |   | 0.705 | 0.000 | 0.000 | 0.425 | 0.001 | 0.004 |
| AS94_12490 |              | RNA methyltransferase                          |   | 0.594 | 0.000 | 0.000 | 0.577 | 0.000 | 0.000 |
| AS94_12545 | <i>purB</i>  | adenylosuccinate lyase                         |   | 0.810 | 0.000 | 0.000 | 0.732 | 0.000 | 0.000 |
| AS94_12550 |              | cysteine protease                              |   | 1.797 | 0.000 | 0.000 | 2.179 | 0.000 | 0.000 |

|            |              |                                                |   |        |       |       |       |       |       |
|------------|--------------|------------------------------------------------|---|--------|-------|-------|-------|-------|-------|
| AS94_12555 |              | staphostatin A                                 |   | 1.108  | 0.001 | 0.004 | 1.670 | 0.000 | 0.000 |
| AS94_12590 |              | C4-dicarboxylate ABC transporter               |   | 0.379  | 0.006 | 0.014 | 0.585 | 0.000 | 0.000 |
| AS94_12630 | <i>blaR1</i> | beta-lactamase                                 |   | 0.440  | 0.017 | 0.036 | 0.535 | 0.004 | 0.009 |
| AS94_12700 |              | membrane protein                               |   | 1.446  | 0.000 | 0.000 | 1.133 | 0.000 | 0.000 |
| AS94_12705 |              | antibiotic ABC transporter ATP-binding protein |   | 1.061  | 0.000 | 0.000 | 0.870 | 0.000 | 0.000 |
| AS94_12710 |              | membrane protein                               |   | 1.386  | 0.000 | 0.001 | 1.031 | 0.006 | 0.015 |
| AS94_12715 |              | sodium ABC transporter ATP-binding protein     |   | 1.491  | 0.000 | 0.000 | 1.381 | 0.000 | 0.000 |
| AS94_12720 |              | GntR family transcriptional regulator          |   | 1.459  | 0.000 | 0.000 | 1.258 | 0.000 | 0.000 |
| AS94_12755 | <i>scn</i>   | complement inhibitor                           | Y | 0.994  | 0.000 | 0.000 | 1.320 | 0.000 | 0.000 |
| AS94_12765 |              | peptidoglycan hydrolase                        |   | 0.700  | 0.000 | 0.000 | 0.537 | 0.001 | 0.004 |
| AS94_12850 |              | molecular chaperone GroES                      |   | 0.653  | 0.000 | 0.000 | 0.925 | 0.000 | 0.000 |
| AS94_12970 | <i>ilvD</i>  | dihydroxy-acid dehydratase                     | Y | 1.657  | 0.000 | 0.000 | 1.727 | 0.000 | 0.000 |
| AS94_12975 | <i>ilvB</i>  | acetolactate synthase                          | Y | 1.006  | 0.000 | 0.000 | 1.070 | 0.000 | 0.000 |
| AS94_12040 |              | hypothetical protein                           |   | 8.459  | 0.000 | 0.000 | 1.352 | 0.014 | 0.031 |
| AS94_12055 |              | autolysin                                      |   | 10.844 | 0.000 | 0.000 | 0.907 | 0.000 | 0.000 |
| AS94_12070 |              | tail protein                                   |   | 11.976 | 0.000 | 0.000 | 1.010 | 0.000 | 0.000 |
| AS94_12075 |              | cell wall hydrolase                            |   | 12.788 | 0.000 | 0.000 | 1.057 | 0.000 | 0.000 |
| AS94_12090 |              | hypothetical protein                           |   | 8.652  | 0.000 | 0.000 | 1.351 | 0.009 | 0.020 |
| AS94_12095 |              | hypothetical protein                           |   | 12.193 | 0.000 | 0.000 | 0.901 | 0.000 | 0.000 |
| AS94_12100 |              | minor structural protein                       |   | 12.567 | 0.000 | 0.000 | 0.806 | 0.000 | 0.000 |
| AS94_12105 | $\phi$ SA169 | peptidase                                      |   | 12.720 | 0.000 | 0.000 | 1.095 | 0.000 | 0.000 |
| AS94_12110 |              | phage tail protein                             |   | 11.456 | 0.000 | 0.000 | 1.205 | 0.000 | 0.000 |
| AS94_12115 |              | membrane protein                               |   | 13.916 | 0.000 | 0.000 | 0.843 | 0.000 | 0.000 |
| AS94_12120 |              | phi 11                                         |   | 9.902  | 0.000 | 0.000 | 1.235 | 0.001 | 0.002 |
| AS94_12125 |              | hypothetical protein                           |   | 10.462 | 0.000 | 0.000 | 1.259 | 0.000 | 0.000 |
| AS94_12130 |              | tail protein                                   |   | 12.239 | 0.000 | 0.000 | 1.063 | 0.000 | 0.000 |
| AS94_12135 |              | phi 11                                         |   | 9.806  | 0.000 | 0.000 | 1.024 | 0.003 | 0.006 |
| AS94_12140 |              | hypothetical protein                           |   | 9.238  | 0.000 | 0.000 | 1.349 | 0.002 | 0.004 |

|            |                    |                                                   |        |       |       |        |       |       |
|------------|--------------------|---------------------------------------------------|--------|-------|-------|--------|-------|-------|
| AS94_12145 |                    | hypothetical protein                              | 8.869  | 0.000 | 0.000 | 1.717  | 0.001 | 0.002 |
| AS94_12150 |                    | phage head-tail adapter protein                   | 10.259 | 0.000 | 0.000 | 1.569  | 0.000 | 0.000 |
| AS94_12155 |                    | phi 11                                            | 8.348  | 0.000 | 0.000 | 1.495  | 0.010 | 0.022 |
| AS94_12160 |                    | hypothetical protein                              | 12.909 | 0.000 | 0.000 | 1.100  | 0.000 | 0.000 |
| AS94_12165 |                    | phage capsid protein                              | 13.409 | 0.000 | 0.000 | 1.440  | 0.000 | 0.000 |
| AS94_12175 |                    | phage head morphogenesis protein                  | 12.222 | 0.000 | 0.000 | 1.017  | 0.000 | 0.000 |
| AS94_12180 |                    | phage portal protein                              | 12.555 | 0.000 | 0.000 | 0.948  | 0.000 | 0.000 |
| AS94_12185 |                    | hypothetical protein                              | 12.014 | 0.000 | 0.000 | 1.121  | 0.000 | 0.000 |
| AS94_12190 |                    | terminase                                         | 11.070 | 0.000 | 0.000 | 0.929  | 0.000 | 0.000 |
| AS94_12345 |                    | BRO-like protein                                  | 12.337 | 0.000 | 0.000 | 0.458  | 0.006 | 0.015 |
| AS94_12375 |                    | integrase                                         | 10.916 | 0.000 | 0.000 | 0.534  | 0.021 | 0.045 |
| AS94_13265 |                    | hypothetical protein                              | 4.162  | 0.000 | 0.000 | 5.182  | 0.000 | 0.000 |
| AS94_13290 |                    | hypothetical protein                              | 8.740  | 0.000 | 0.000 | 8.643  | 0.000 | 0.000 |
| AS94_13305 |                    | DNA replication protein DnaC                      | 0.938  | 0.000 | 0.001 | 1.570  | 0.000 | 0.000 |
| AS94_13310 |                    | replication protein                               | 10.627 | 0.000 | 0.000 | 10.530 | 0.000 | 0.000 |
| AS94_13315 | mutual<br>prophage | hypothetical protein                              | 10.070 | 0.000 | 0.000 | 9.973  | 0.000 | 0.000 |
| AS94_13395 |                    | integrase                                         | 0.983  | 0.000 | 0.000 | 1.071  | 0.000 | 0.000 |
| AS94_13490 |                    | peptidyl-prolyl cis-trans isomerase               | 2.346  | 0.000 | 0.000 | 2.758  | 0.000 | 0.000 |
| AS94_13500 |                    | DNA double-strand break repair Rad50<br>ATPase    | 0.307  | 0.003 | 0.007 | 0.415  | 0.000 | 0.000 |
| AS94_13575 |                    | amino acid ABC transporter ATP-binding<br>protein | 4.177  | 0.000 | 0.000 | 4.322  | 0.000 | 0.000 |
| AS94_13580 |                    | glutamate ABC transporter permease                | 4.391  | 0.000 | 0.000 | 4.340  | 0.000 | 0.000 |
