# Supplementary material for: Transcriptome Analyses of Prophage in Mediating Persistent Methicillin-Resistant Staphylococcus aureus Endovascular Infection
Source: MDPI journal article supplement (doi:10.3390/genes13091527), 2022-08-25
Supplement: s1 [file s1]

Table S1. Up-regulated DEGs in 301-188:: $\phi$ SA169 vs. 301-188

| locus      | group        | product                                          | log <sub>2</sub> (fold change) | p value | p adj |
|------------|--------------|--------------------------------------------------|--------------------------------|---------|-------|
| AS94_02500 | host genes   | glutamine synthetase                             | 0.556                          | 0.000   | 0.002 |
| AS94_02505 |              | MerR family transcriptional regulator            | 0.933                          | 0.000   | 0.000 |
| AS94_02590 |              | 2-oxoacid ferredoxin oxidoreductase subunit beta | 0.507                          | 0.001   | 0.022 |
| AS94_02930 |              | 50S ribosomal protein L28                        | 0.362                          | 0.002   | 0.035 |
| AS94_04115 |              | 3-oxoacyl-ACP synthase                           | 0.423                          | 0.000   | 0.008 |
| AS94_04120 |              | 3-oxoacyl-ACP synthase                           | 0.577                          | 0.000   | 0.005 |
| AS94_04780 |              | amino acid permease                              | 0.507                          | 0.000   | 0.001 |
| AS94_05160 |              | Na/Pi cotransporter                              | 0.690                          | 0.000   | 0.003 |
| AS94_05540 |              | glycine/betaine ABC transporter permease         | 0.439                          | 0.001   | 0.020 |
| AS94_05860 |              | guanine permease                                 | 0.557                          | 0.001   | 0.022 |
| AS94_06080 |              | hypothetical protein                             | 0.661                          | 0.000   | 0.000 |
| AS94_06090 |              | octopine dehydrogenase                           | 0.496                          | 0.001   | 0.015 |
| AS94_06100 |              | hypothetical protein                             | 0.508                          | 0.001   | 0.024 |
| AS94_06130 |              | hypothetical protein                             | 0.502                          | 0.001   | 0.011 |
| AS94_06265 |              | lysostaphin resistance protein A                 | 0.492                          | 0.000   | 0.004 |
| AS94_06310 |              | sodium:glutamate symporter                       | 0.479                          | 0.002   | 0.039 |
| AS94_07090 |              | hypothetical protein                             | 0.386                          | 0.002   | 0.038 |
| AS94_07245 |              | holin                                            | 0.604                          | 0.001   | 0.011 |
| AS94_07385 |              | transglycosylase                                 | 0.712                          | 0.000   | 0.000 |
| AS94_07830 |              | alpha/beta hydrolase                             | 0.557                          | 0.000   | 0.001 |
| AS94_08370 |              | lipid kinase                                     | 0.447                          | 0.000   | 0.002 |
| AS94_08925 |              | DEAD/DEAH box helicase                           | 0.502                          | 0.000   | 0.002 |
| AS94_09125 |              | aldehyde dehydrogenase                           | 0.440                          | 0.000   | 0.008 |
| AS94_10160 |              | glycyl-glycine endopeptidase                     | 0.540                          | 0.000   | 0.009 |
| AS94_11275 |              | adenylosuccinate synthetase                      | 0.471                          | 0.003   | 0.047 |
| AS94_11985 |              | multidrug ABC transporter ATP-binding protein    | 0.417                          | 0.001   | 0.011 |
| AS94_12030 |              | general stress protein                           | 0.375                          | 0.001   | 0.012 |
| AS94_12410 |              | ribonuclease BN                                  | 0.420                          | 0.003   | 0.044 |
| AS94_12040 | $\phi$ SA169 | hypothetical protein                             | 7.107                          | 0.000   | 0.000 |
| AS94_12045 |              | XRE family transcriptional regulator             | 12.651                         | 0.000   | 0.000 |
| AS94_12050 |              | hypothetical protein                             | 10.258                         | 0.000   | 0.000 |
| AS94_12055 |              | autolysin                                        | 9.937                          | 0.000   | 0.000 |

|            |                                   |        |       |       |
|------------|-----------------------------------|--------|-------|-------|
| AS94_12060 | holin                             | 7.646  | 0.000 | 0.000 |
| AS94_12065 | hypothetical protein              | 8.700  | 0.000 | 0.000 |
| AS94_12070 | tail protein                      | 10.966 | 0.000 | 0.000 |
| AS94_12075 | cell wall hydrolase               | 11.731 | 0.000 | 0.000 |
| AS94_12080 | hypothetical protein              | 8.839  | 0.000 | 0.000 |
| AS94_12090 | hypothetical protein              | 7.301  | 0.000 | 0.000 |
| AS94_12095 | hypothetical protein              | 11.292 | 0.000 | 0.000 |
| AS94_12100 | minor structural protein          | 11.761 | 0.000 | 0.000 |
| AS94_12105 | peptidase                         | 11.625 | 0.000 | 0.000 |
| AS94_12110 | phage tail protein                | 10.251 | 0.000 | 0.000 |
| AS94_12115 | membrane protein                  | 13.073 | 0.000 | 0.000 |
| AS94_12120 | phi 11                            | 8.667  | 0.000 | 0.000 |
| AS94_12125 | hypothetical protein              | 9.203  | 0.000 | 0.000 |
| AS94_12130 | tail protein                      | 11.175 | 0.000 | 0.000 |
| AS94_12135 | phi 11                            | 8.782  | 0.000 | 0.000 |
| AS94_12140 | hypothetical protein              | 7.889  | 0.000 | 0.000 |
| AS94_12145 | hypothetical protein              | 7.152  | 0.000 | 0.000 |
| AS94_12150 | phage head-tail adapter protein   | 8.690  | 0.000 | 0.000 |
| AS94_12155 | phi 11                            | 6.853  | 0.000 | 0.000 |
| AS94_12160 | hypothetical protein              | 11.809 | 0.000 | 0.000 |
| AS94_12165 | phage capsid protein              | 11.968 | 0.000 | 0.000 |
| AS94_12170 | hypothetical protein              | 6.290  | 0.000 | 0.003 |
| AS94_12175 | phage head morphogenesis protein  | 11.205 | 0.000 | 0.000 |
| AS94_12180 | phage portal protein              | 11.607 | 0.000 | 0.000 |
| AS94_12185 | hypothetical protein              | 10.893 | 0.000 | 0.000 |
| AS94_12190 | terminase                         | 10.141 | 0.000 | 0.000 |
| AS94_12195 | transcriptional regulator         | 10.043 | 0.000 | 0.000 |
| AS94_12210 | hypothetical protein              | 8.216  | 0.000 | 0.000 |
| AS94_12215 | hypothetical protein              | 7.154  | 0.000 | 0.001 |
| AS94_12220 | dUTP pyrophosphatase              | 9.847  | 0.000 | 0.000 |
| AS94_12230 | hypothetical protein              | 6.690  | 0.000 | 0.000 |
| AS94_12240 | hypothetical protein              | 8.842  | 0.000 | 0.000 |
| AS94_12270 | DNA N-6-adenine-methyltransferase | 5.757  | 0.000 | 0.000 |
| AS94_12295 | hypothetical protein              | 9.662  | 0.000 | 0.000 |

|            |                                      |        |       |       |
|------------|--------------------------------------|--------|-------|-------|
| AS94_12320 | hypothetical protein                 | 5.724  | 0.002 | 0.030 |
| AS94_12325 | hypothetical protein                 | 10.130 | 0.000 | 0.000 |
| AS94_12330 | hypothetical protein                 | 6.362  | 0.000 | 0.005 |
| AS94_12340 | hypothetical protein                 | 6.265  | 0.000 | 0.003 |
| AS94_12345 | BRO-like protein                     | 11.879 | 0.000 | 0.000 |
| AS94_12350 | hypothetical protein                 | 10.468 | 0.000 | 0.000 |
| AS94_12355 | XRE family transcriptional regulator | 8.090  | 0.000 | 0.000 |
| AS94_12360 | transcriptional regulator            | 12.883 | 0.000 | 0.000 |
| AS94_12365 | hypothetical protein                 | 8.858  | 0.000 | 0.000 |
| AS94_12370 | repressor                            | 12.980 | 0.000 | 0.000 |
| AS94_12375 | integrase                            | 10.382 | 0.000 | 0.000 |
