# Supplementary material for: Transcriptome Analyses of Prophage in Mediating Persistent Methicillin-Resistant Staphylococcus aureus Endovascular Infection
Source: MDPI journal article supplement (doi:10.3390/genes13091527), 2022-08-25
Supplement: s1 [file s1]

Table S9. DEGs up-regulated by both  $\phi$ SA169 and MRSA genetic backgrounds

| locus      | gene        | group        | product                                       | 301-188:: $\phi$ SA169 vs. 301-188 |         |       | 300-169 vs. 301-188            |         |       | 300-169 vs. 301-188:: $\phi$ SA169 |         |       |
|------------|-------------|--------------|-----------------------------------------------|------------------------------------|---------|-------|--------------------------------|---------|-------|------------------------------------|---------|-------|
|            |             |              |                                               | log <sub>2</sub> (fold change)     | p value | p adj | log <sub>2</sub> (fold change) | p value | p adj | log <sub>2</sub> (fold change)     | p value | p adj |
| AS94_04115 | <i>fabF</i> |              | 3-oxoacyl-ACP synthase                        | 0.423                              | 0.000   | 0.008 | 0.719                          | 0.000   | 0.000 | 0.295                              | 0.012   | 0.027 |
| AS94_04120 | <i>fabH</i> |              | 3-oxoacyl-ACP synthase                        | 0.577                              | 0.000   | 0.005 | 1.095                          | 0.000   | 0.000 | 0.517                              | 0.001   | 0.002 |
| AS94_04780 |             |              | amino acid permease                           | 0.507                              | 0.000   | 0.001 | 1.289                          | 0.000   | 0.000 | 0.782                              | 0.000   | 0.000 |
| AS94_05540 |             |              | glycine/betaine ABC transporter permease      | 0.439                              | 0.001   | 0.020 | 1.635                          | 0.000   | 0.000 | 1.196                              | 0.000   | 0.000 |
| AS94_06080 |             | host         | hypothetical protein                          | 0.661                              | 0.000   | 0.000 | 1.519                          | 0.000   | 0.000 | 0.859                              | 0.000   | 0.000 |
| AS94_06310 |             | genes        | sodium:glutamate symporter                    | 0.479                              | 0.002   | 0.039 | 1.092                          | 0.000   | 0.000 | 0.613                              | 0.000   | 0.000 |
| AS94_11275 | <i>purA</i> |              | adenylosuccinate synthetase                   | 0.471                              | 0.003   | 0.047 | 2.591                          | 0.000   | 0.000 | 2.120                              | 0.000   | 0.000 |
| AS94_11985 |             |              | multidrug ABC transporter ATP-binding protein | 0.417                              | 0.001   | 0.011 | 0.925                          | 0.000   | 0.000 | 0.508                              | 0.000   | 0.000 |
| AS94_12030 |             |              | general stress protein                        | 0.375                              | 0.001   | 0.012 | 0.703                          | 0.000   | 0.000 | 0.329                              | 0.002   | 0.006 |
| AS94_12410 |             |              | ribonuclease BN                               | 0.420                              | 0.003   | 0.044 | 1.228                          | 0.000   | 0.000 | 0.808                              | 0.000   | 0.000 |
| AS94_12040 |             |              | hypothetical protein                          | 7.107                              | 0.000   | 0.000 | 8.459                          | 0.000   | 0.000 | 1.352                              | 0.014   | 0.031 |
| AS94_12055 |             |              | autolysin                                     | 9.937                              | 0.000   | 0.000 | 10.844                         | 0.000   | 0.000 | 0.907                              | 0.000   | 0.000 |
| AS94_12070 |             |              | tail protein                                  | 10.966                             | 0.000   | 0.000 | 11.976                         | 0.000   | 0.000 | 1.010                              | 0.000   | 0.000 |
| AS94_12075 |             |              | cell wall hydrolase                           | 11.731                             | 0.000   | 0.000 | 12.788                         | 0.000   | 0.000 | 1.057                              | 0.000   | 0.000 |
| AS94_12090 |             |              | hypothetical protein                          | 7.301                              | 0.000   | 0.000 | 8.652                          | 0.000   | 0.000 | 1.351                              | 0.009   | 0.020 |
| AS94_12095 |             |              | hypothetical protein                          | 11.292                             | 0.000   | 0.000 | 12.193                         | 0.000   | 0.000 | 0.901                              | 0.000   | 0.000 |
| AS94_12100 |             | $\phi$ SA169 | minor structural protein                      | 11.761                             | 0.000   | 0.000 | 12.567                         | 0.000   | 0.000 | 0.806                              | 0.000   | 0.000 |
| AS94_12105 |             |              | peptidase                                     | 11.625                             | 0.000   | 0.000 | 12.720                         | 0.000   | 0.000 | 1.095                              | 0.000   | 0.000 |
| AS94_12110 |             |              | phage tail protein                            | 10.251                             | 0.000   | 0.000 | 11.456                         | 0.000   | 0.000 | 1.205                              | 0.000   | 0.000 |
| AS94_12115 |             |              | membrane protein                              | 13.073                             | 0.000   | 0.000 | 13.916                         | 0.000   | 0.000 | 0.843                              | 0.000   | 0.000 |
| AS94_12120 |             |              | phi 11                                        | 8.667                              | 0.000   | 0.000 | 9.902                          | 0.000   | 0.000 | 1.235                              | 0.001   | 0.002 |
| AS94_12125 |             |              | hypothetical protein                          | 9.203                              | 0.000   | 0.000 | 10.462                         | 0.000   | 0.000 | 1.259                              | 0.000   | 0.000 |
| AS94_12130 |             |              | tail protein                                  | 11.175                             | 0.000   | 0.000 | 12.239                         | 0.000   | 0.000 | 1.063                              | 0.000   | 0.000 |
| AS94_12135 |             |              | phi 11                                        | 8.782                              | 0.000   | 0.000 | 9.806                          | 0.000   | 0.000 | 1.024                              | 0.003   | 0.006 |

|            |                                  |        |       |       |        |       |       |       |       |       |
|------------|----------------------------------|--------|-------|-------|--------|-------|-------|-------|-------|-------|
| AS94_12140 | hypothetical protein             | 7.889  | 0.000 | 0.000 | 9.238  | 0.000 | 0.000 | 1.349 | 0.002 | 0.004 |
| AS94_12145 | hypothetical protein             | 7.152  | 0.000 | 0.000 | 8.869  | 0.000 | 0.000 | 1.717 | 0.001 | 0.002 |
| AS94_12150 | phage head-tail adapter protein  | 8.690  | 0.000 | 0.000 | 10.259 | 0.000 | 0.000 | 1.569 | 0.000 | 0.000 |
| AS94_12155 | phi 11                           | 6.853  | 0.000 | 0.000 | 8.348  | 0.000 | 0.000 | 1.495 | 0.010 | 0.022 |
| AS94_12160 | hypothetical protein             | 11.809 | 0.000 | 0.000 | 12.909 | 0.000 | 0.000 | 1.100 | 0.000 | 0.000 |
| AS94_12165 | phage capsid protein             | 11.968 | 0.000 | 0.000 | 13.409 | 0.000 | 0.000 | 1.440 | 0.000 | 0.000 |
| AS94_12175 | phage head morphogenesis protein | 11.205 | 0.000 | 0.000 | 12.222 | 0.000 | 0.000 | 1.017 | 0.000 | 0.000 |
| AS94_12180 | phage portal protein             | 11.607 | 0.000 | 0.000 | 12.555 | 0.000 | 0.000 | 0.948 | 0.000 | 0.000 |
| AS94_12185 | hypothetical protein             | 10.893 | 0.000 | 0.000 | 12.014 | 0.000 | 0.000 | 1.121 | 0.000 | 0.000 |
| AS94_12190 | terminase                        | 10.141 | 0.000 | 0.000 | 11.070 | 0.000 | 0.000 | 0.929 | 0.000 | 0.000 |
| AS94_12345 | BRO-like protein                 | 11.879 | 0.000 | 0.000 | 12.337 | 0.000 | 0.000 | 0.458 | 0.006 | 0.015 |
| AS94_12375 | integrase                        | 10.382 | 0.000 | 0.000 | 10.916 | 0.000 | 0.000 | 0.534 | 0.021 | 0.045 |
