# Supplementary material for: Transcriptome Analyses of Prophage in Mediating Persistent Methicillin-Resistant Staphylococcus aureus Endovascular Infection
Source: MDPI journal article supplement (doi:10.3390/genes13091527), 2022-08-25
Supplement: s1 [file s1]

Table S8. Down-regulated DEGs in both 300-169 vs. 301-188 and 300-169 vs. 301-188::ϕSA169

| locus      | gene        | group | product                                | agr-regulated<br>(Y) | sarA-regulated<br>(Y) | sigB-regulated<br>(Y) | 300-169 vs. 301-188            |         |       | 300-169 vs. 301-188::ϕSA169    |         |       |
|------------|-------------|-------|----------------------------------------|----------------------|-----------------------|-----------------------|--------------------------------|---------|-------|--------------------------------|---------|-------|
|            |             |       |                                        |                      |                       |                       | log <sub>2</sub> (fold change) | p value | p adj | log <sub>2</sub> (fold change) | p value | p adj |
| AS94_00045 |             |       | membrane protein                       |                      |                       |                       | -0.688                         | 0.001   | 0.002 | -0.567                         | 0.007   | 0.016 |
| AS94_00055 |             |       | dipeptidyl aminopeptidase              |                      |                       |                       | -0.628                         | 0.000   | 0.000 | -0.623                         | 0.000   | 0.000 |
| AS94_00195 |             |       | multidrug MFS transporter              |                      |                       |                       | -0.319                         | 0.021   | 0.044 | -0.461                         | 0.001   | 0.002 |
| AS94_00205 |             |       | hypothetical protein                   |                      |                       |                       | -0.923                         | 0.000   | 0.000 | -0.894                         | 0.000   | 0.000 |
| AS94_00245 |             |       | phosphotransferase                     |                      |                       |                       | -0.858                         | 0.000   | 0.000 | -0.916                         | 0.000   | 0.000 |
| AS94_00250 |             |       | tRNA (guanine-N(7)-)-methyltransferase |                      |                       |                       | -0.494                         | 0.000   | 0.000 | -0.563                         | 0.000   | 0.000 |
| AS94_00255 |             |       | hypothetical protein                   |                      |                       |                       | -0.984                         | 0.000   | 0.000 | -0.895                         | 0.000   | 0.000 |
| AS94_00270 |             |       | thioredoxin                            |                      |                       |                       | -0.376                         | 0.007   | 0.017 | -0.406                         | 0.004   | 0.010 |
| AS94_00305 |             |       | 3-deoxy-7-phosphoheptulonate synthase  |                      |                       |                       | -1.464                         | 0.000   | 0.000 | -1.566                         | 0.000   | 0.000 |
| AS94_00370 | <i>aroA</i> |       | 3-phosphoglycerate dehydrogenase       |                      |                       |                       | -0.473                         | 0.001   | 0.002 | -0.480                         | 0.001   | 0.002 |
| AS94_00395 | <i>serA</i> |       | hypothetical protein                   |                      | Y                     |                       | -0.414                         | 0.017   | 0.035 | -0.572                         | 0.001   | 0.003 |
| AS94_00435 |             |       | universal stress protein UspA          |                      |                       |                       | -2.146                         | 0.000   | 0.000 | -1.876                         | 0.000   | 0.000 |
| AS94_00445 |             |       | dipeptidase                            |                      |                       |                       | -0.631                         | 0.000   | 0.000 | -0.632                         | 0.000   | 0.000 |
| AS94_00450 |             |       | beta-lactamase                         |                      |                       |                       | -1.246                         | 0.000   | 0.000 | -1.457                         | 0.000   | 0.000 |
| AS94_00460 |             |       | universal stress protein UspA          |                      |                       |                       | -1.098                         | 0.000   | 0.000 | -1.219                         | 0.000   | 0.000 |
| AS94_00505 | <i>pfkA</i> |       | 6-phosphofructokinase                  |                      |                       |                       | -0.997                         | 0.000   | 0.000 | -1.025                         | 0.000   | 0.000 |
| AS94_00510 | <i>pyk</i>  |       | pyruvate kinase                        |                      |                       |                       | -0.667                         | 0.000   | 0.000 | -0.834                         | 0.000   | 0.000 |
| AS94_00525 | <i>icd</i>  |       | isocitrate dehydrogenase               |                      |                       |                       | -0.612                         | 0.000   | 0.000 | -0.533                         | 0.000   | 0.000 |
| AS94_00545 | <i>polA</i> |       | DNA polymerase I                       |                      |                       |                       | -0.519                         | 0.000   | 0.000 | -0.455                         | 0.000   | 0.000 |
| AS94_00550 | <i>mutM</i> |       | formamidopyrimidine-DNA glycosylase    |                      |                       |                       | -0.486                         | 0.000   | 0.000 | -0.471                         | 0.000   | 0.000 |
| AS94_00555 | <i>coaE</i> |       | dephospho-CoA kinase                   |                      |                       |                       | -1.148                         | 0.000   | 0.000 | -1.236                         | 0.000   | 0.000 |
| AS94_00575 |             |       | primosomal protein DnaI                |                      |                       |                       | -0.406                         | 0.000   | 0.001 | -0.388                         | 0.001   | 0.002 |
| AS94_00580 | <i>thrS</i> |       | threonyl-tRNA synthase                 |                      |                       |                       | -1.711                         | 0.000   | 0.000 | -1.991                         | 0.000   | 0.000 |
| AS94_00585 |             |       | gamma-aminobutyrate permease           |                      |                       |                       | -1.052                         | 0.000   | 0.000 | -1.476                         | 0.000   | 0.000 |
| AS94_00645 |             |       | uroporphyrinogen III synthase          |                      |                       |                       | -0.444                         | 0.005   | 0.011 | -0.371                         | 0.019   | 0.041 |

|            |             |                                              |   |        |       |       |        |       |       |
|------------|-------------|----------------------------------------------|---|--------|-------|-------|--------|-------|-------|
| AS94_00650 | <i>hemB</i> | delta-aminolevulinic acid dehydratase        |   | -0.273 | 0.022 | 0.044 | -0.343 | 0.004 | 0.010 |
| AS94_00655 | <i>hemL</i> | glutamate-1-semialdehyde<br>aminotransferase |   | -0.376 | 0.001 | 0.002 | -0.492 | 0.000 | 0.000 |
| AS94_00665 |             | DNA-3-methyladenine glycosylase              |   | -1.452 | 0.000 | 0.000 | -1.350 | 0.000 | 0.000 |
| AS94_00730 | <i>rpmA</i> | 50S ribosomal protein L27                    |   | -1.294 | 0.000 | 0.000 | -1.359 | 0.000 | 0.000 |
| AS94_00735 |             | GTPase CgtA                                  |   | -0.331 | 0.006 | 0.014 | -0.346 | 0.004 | 0.011 |
| AS94_00785 | <i>relA</i> | GTP pyrophosphokinase                        | Y | -0.367 | 0.000 | 0.001 | -0.241 | 0.022 | 0.047 |
| AS94_00795 |             | cell wall amidase                            |   | -0.459 | 0.000 | 0.001 | -0.446 | 0.001 | 0.002 |
| AS94_00800 |             | hypothetical protein                         |   | -0.369 | 0.014 | 0.029 | -0.383 | 0.011 | 0.024 |
| AS94_00810 | <i>aspS</i> | aspartyl-tRNA synthase                       |   | -0.666 | 0.000 | 0.000 | -0.611 | 0.000 | 0.000 |
| AS94_00840 |             | hypothetical protein                         |   | -0.698 | 0.000 | 0.000 | -0.828 | 0.000 | 0.000 |
| AS94_00860 |             | hypothetical protein                         |   | -0.429 | 0.000 | 0.001 | -0.396 | 0.001 | 0.002 |
| AS94_00870 |             | hypothetical protein                         |   | -0.524 | 0.001 | 0.002 | -0.541 | 0.001 | 0.002 |
| AS94_00875 |             | Holliday junction resolvase                  |   | -0.517 | 0.000 | 0.000 | -0.446 | 0.000 | 0.001 |
| AS94_00880 |             | hypothetical protein                         |   | -0.394 | 0.003 | 0.006 | -0.433 | 0.001 | 0.003 |
| AS94_00905 |             | transcription elongation factor GreA         |   | -0.418 | 0.001 | 0.003 | -0.305 | 0.017 | 0.036 |
| AS94_01005 | <i>comE</i> | deoxycytidylate deaminase                    |   | -0.636 | 0.000 | 0.001 | -0.694 | 0.000 | 0.000 |
| AS94_01185 |             | superoxide dismutase                         |   | -0.792 | 0.000 | 0.000 | -0.779 | 0.000 | 0.000 |
| AS94_01260 |             | shikimate kinase                             |   | -0.601 | 0.000 | 0.001 | -0.493 | 0.003 | 0.008 |
| AS94_01265 | <i>gcvT</i> | glycine cleavage system protein T            |   | -0.624 | 0.000 | 0.000 | -0.518 | 0.000 | 0.001 |
| AS94_01270 |             | glycine dehydrogenase subunit 1              |   | -0.769 | 0.000 | 0.000 | -0.706 | 0.000 | 0.000 |
| AS94_01275 |             | glycine dehydrogenase subunit 2              |   | -1.048 | 0.000 | 0.000 | -1.029 | 0.000 | 0.000 |
| AS94_01370 |             | 2-oxoglutarate dehydrogenase E2              |   | -0.549 | 0.000 | 0.000 | -0.639 | 0.000 | 0.000 |
| AS94_01405 |             | transcriptional regulator                    |   | -1.046 | 0.000 | 0.000 | -0.834 | 0.000 | 0.000 |
| AS94_01410 | <i>malA</i> | trehalose-6-phosphate hydrolase              |   | -1.817 | 0.000 | 0.000 | -1.788 | 0.000 | 0.000 |
| AS94_01430 | <i>proC</i> | pyrroline-5-carboxylate reductase            |   | -0.782 | 0.000 | 0.000 | -0.677 | 0.000 | 0.000 |
| AS94_01460 |             | tyrosine recombinase XerD                    |   | -0.925 | 0.000 | 0.000 | -0.800 | 0.000 | 0.000 |
| AS94_01490 | <i>srrB</i> | sensor histidine kinase                      |   | -0.390 | 0.000 | 0.001 | -0.314 | 0.003 | 0.006 |
| AS94_01560 |             | glycerol-3-phosphate dehydrogenase           |   | -0.516 | 0.000 | 0.000 | -0.621 | 0.000 | 0.000 |

|            |             |                                                    |        |       |       |        |       |       |
|------------|-------------|----------------------------------------------------|--------|-------|-------|--------|-------|-------|
| AS94_01565 |             | DNA-binding protein                                | -0.800 | 0.000 | 0.000 | -0.780 | 0.000 | 0.000 |
| AS94_01630 |             | hypothetical protein                               | -0.556 | 0.006 | 0.013 | -0.463 | 0.022 | 0.046 |
| AS94_01665 | <i>nth</i>  | endonuclease III                                   | -0.449 | 0.013 | 0.028 | -0.649 | 0.000 | 0.001 |
| AS94_01700 |             | hypothetical protein                               | -0.394 | 0.000 | 0.001 | -0.461 | 0.000 | 0.000 |
| AS94_01735 | <i>ilvA</i> | threonine dehydratase                              | -0.607 | 0.000 | 0.000 | -0.402 | 0.011 | 0.025 |
| AS94_01745 |             | quinolone resistance protein NorB                  | -0.667 | 0.000 | 0.000 | -0.495 | 0.001 | 0.004 |
| AS94_01750 |             | matrix-binding protein                             | -0.438 | 0.000 | 0.000 | -0.381 | 0.000 | 0.001 |
| AS94_01780 |             | hypothetical protein                               | -0.493 | 0.000 | 0.001 | -0.648 | 0.000 | 0.000 |
| AS94_01795 |             | hypothetical protein                               | -0.462 | 0.000 | 0.000 | -0.444 | 0.000 | 0.000 |
| AS94_01800 |             | methionine sulfoxide reductase A                   | -0.421 | 0.000 | 0.000 | -0.371 | 0.001 | 0.002 |
| AS94_01805 |             | methionine sulfoxide reductase B                   | -0.355 | 0.005 | 0.012 | -0.466 | 0.000 | 0.001 |
| AS94_01810 | <i>crr</i>  | PTS glucose transporter subunit IIA                | -0.295 | 0.012 | 0.025 | -0.432 | 0.000 | 0.001 |
| AS94_01920 |             | hypothetical protein                               | -1.003 | 0.000 | 0.000 | -0.943 | 0.000 | 0.000 |
| AS94_01935 |             | protease                                           | -0.737 | 0.000 | 0.000 | -0.909 | 0.000 | 0.000 |
| AS94_02100 |             | aminopeptidase                                     | -0.884 | 0.000 | 0.000 | -0.875 | 0.000 | 0.000 |
| AS94_02105 |             | prephenate dehydrogenase                           | -0.747 | 0.000 | 0.000 | -0.810 | 0.000 | 0.000 |
| AS94_02110 |             | DNA repair protein MucB                            | -1.701 | 0.000 | 0.000 | -1.518 | 0.000 | 0.000 |
| AS94_02115 |             | 4-oxalocrotonate tautomerase                       | -1.777 | 0.000 | 0.000 | -1.891 | 0.000 | 0.000 |
| AS94_02125 |             | methionine sulfoxide reductase A                   | -0.532 | 0.000 | 0.001 | -0.396 | 0.007 | 0.017 |
| AS94_02145 |             | transcriptional regulator                          | -0.589 | 0.005 | 0.012 | -0.709 | 0.001 | 0.002 |
| AS94_02165 | <i>plsY</i> | glycerol-3-phosphate acyltransferase               | -0.456 | 0.000 | 0.001 | -0.377 | 0.002 | 0.006 |
| AS94_02230 |             | XRE family transcriptional regulator               | -1.344 | 0.000 | 0.000 | -1.470 | 0.000 | 0.000 |
| AS94_02255 | <i>rpmG</i> | 50S ribosomal protein L33                          | -0.526 | 0.002 | 0.004 | -0.422 | 0.012 | 0.027 |
| AS94_02270 |             | hypothetical protein                               | -0.544 | 0.000 | 0.001 | -0.378 | 0.009 | 0.022 |
| AS94_02530 | <i>miaA</i> | tRNA delta(2)-isopentenylpyrophosphate transferase | -0.440 | 0.013 | 0.028 | -0.411 | 0.020 | 0.044 |
| AS94_02535 |             | lysophospholipase                                  | -0.980 | 0.000 | 0.000 | -0.821 | 0.000 | 0.000 |
| AS94_02540 |             | glycerol-3-phosphate dehydrogenase                 | -0.736 | 0.000 | 0.000 | -0.747 | 0.000 | 0.000 |
| AS94_02590 |             | 2-oxoacid ferredoxin oxidoreductase subunit beta   | -0.782 | 0.000 | 0.000 | -1.289 | 0.000 | 0.000 |

|            |              |                                                        |   |   |        |       |       |        |       |       |
|------------|--------------|--------------------------------------------------------|---|---|--------|-------|-------|--------|-------|-------|
| AS94_02595 |              | 2-oxoglutarate ferredoxin oxidoreductase subunit alpha |   |   | -0.948 | 0.000 | 0.000 | -1.245 | 0.000 | 0.000 |
| AS94_02615 | <i>recA</i>  | protein RecA                                           |   |   | -0.281 | 0.006 | 0.013 | -0.316 | 0.002 | 0.005 |
| AS94_02660 |              | cell division protein FtsK                             |   |   | -0.277 | 0.014 | 0.030 | -0.289 | 0.010 | 0.024 |
| AS94_02665 | <i>rnjB</i>  | ribonuclease J                                         |   |   | -0.452 | 0.000 | 0.000 | -0.474 | 0.000 | 0.000 |
| AS94_02690 |              | ribosome-binding factor A                              |   |   | -0.467 | 0.001 | 0.002 | -0.560 | 0.000 | 0.000 |
| AS94_02720 | <i>polC</i>  | DNA polymerase III subunit alpha                       |   |   | -0.333 | 0.002 | 0.004 | -0.432 | 0.000 | 0.000 |
| AS94_02865 | <i>ffh</i>   | signal recognition particle protein Srp54              |   |   | -0.764 | 0.000 | 0.000 | -0.786 | 0.000 | 0.000 |
| AS94_02930 | <i>rpmB</i>  | 50S ribosomal protein L28                              |   |   | -1.592 | 0.000 | 0.000 | -1.954 | 0.000 | 0.000 |
| AS94_02990 | <i>priA</i>  | primosome assembly protein PriA                        |   |   | -0.682 | 0.000 | 0.000 | -0.645 | 0.000 | 0.000 |
| AS94_02995 | <i>coaBC</i> | phosphopantothienoylcysteine decarboxylase             |   |   | -0.718 | 0.000 | 0.000 | -0.662 | 0.000 | 0.000 |
| AS94_03000 | <i>rpoZ</i>  | DNA-directed RNA polymerase subunit omega              |   |   | -0.981 | 0.000 | 0.001 | -1.050 | 0.000 | 0.001 |
| AS94_03005 | <i>gmk</i>   | guanylate kinase                                       |   |   | -0.391 | 0.002 | 0.005 | -0.338 | 0.007 | 0.017 |
| AS94_03075 |              | glyoxalase                                             |   |   | -1.094 | 0.000 | 0.000 | -1.127 | 0.000 | 0.000 |
| AS94_03080 | <i>ileS</i>  | isoleucyl-tRNA synthetase                              |   |   | -0.878 | 0.000 | 0.000 | -0.993 | 0.000 | 0.000 |
| AS94_03170 |              | 5'-nucleotidase                                        |   |   | -0.503 | 0.000 | 0.000 | -0.493 | 0.000 | 0.000 |
| AS94_03205 |              | hypothetical protein                                   |   |   | -0.894 | 0.000 | 0.000 | -0.951 | 0.000 | 0.000 |
| AS94_03210 | <i>arcC</i>  | carbamate kinase                                       | Y |   | -2.248 | 0.000 | 0.000 | -2.256 | 0.000 | 0.000 |
| AS94_03215 | <i>argF</i>  | ornithine carbamoyltransferase                         | Y | Y | -0.905 | 0.000 | 0.000 | -0.686 | 0.000 | 0.000 |
| AS94_03290 |              | phosphoesterase                                        |   |   | -1.105 | 0.000 | 0.000 | -1.167 | 0.000 | 0.000 |
| AS94_03295 | <i>rdgB</i>  | deoxyribonucleotide triphosphate pyrophosphatase       |   |   | -1.087 | 0.000 | 0.000 | -1.136 | 0.000 | 0.000 |
| AS94_03300 | <i>murI</i>  | glutamate racemase                                     |   |   | -1.035 | 0.000 | 0.000 | -1.082 | 0.000 | 0.000 |
| AS94_03325 |              | thioredoxin                                            |   |   | -0.716 | 0.000 | 0.000 | -0.610 | 0.000 | 0.000 |
| AS94_03355 | <i>pheT</i>  | phenylalanyl-tRNA synthase subunit beta                |   |   | -0.647 | 0.000 | 0.000 | -0.694 | 0.000 | 0.000 |
| AS94_03425 | <i>coaD</i>  | phosphopantetheine adenylyltransferase                 |   |   | -0.633 | 0.000 | 0.001 | -0.611 | 0.001 | 0.002 |
| AS94_03505 |              | inositol monophosphatase                               |   |   | -0.694 | 0.000 | 0.000 | -0.780 | 0.000 | 0.000 |
| AS94_03510 |              | hypothetical protein                                   |   |   | -0.787 | 0.000 | 0.000 | -0.862 | 0.000 | 0.000 |
| AS94_03515 |              | manganese transporter                                  |   |   | -0.467 | 0.000 | 0.000 | -0.496 | 0.000 | 0.000 |

|            |             |                                                                         |   |   |        |       |       |        |       |       |
|------------|-------------|-------------------------------------------------------------------------|---|---|--------|-------|-------|--------|-------|-------|
| AS94_03590 |             | hypothetical protein                                                    |   |   | -0.498 | 0.001 | 0.002 | -0.339 | 0.020 | 0.044 |
| AS94_03635 |             | SAM-dependent methyltransferase                                         |   |   | -1.007 | 0.000 | 0.000 | -0.999 | 0.000 | 0.000 |
| AS94_03650 |             | thiamine ABC transporter permease                                       |   |   | -0.662 | 0.002 | 0.006 | -0.785 | 0.000 | 0.001 |
| AS94_03655 |             | ABC transporter ATP-binding protein                                     |   |   | -0.672 | 0.000 | 0.000 | -0.735 | 0.000 | 0.000 |
| AS94_03660 |             | cobalt ABC transporter permease                                         |   |   | -1.017 | 0.000 | 0.000 | -1.253 | 0.000 | 0.000 |
| AS94_03735 | <i>qoxA</i> | quinol oxidase subunit 2                                                |   |   | -0.806 | 0.000 | 0.000 | -0.799 | 0.000 | 0.000 |
| AS94_03740 | <i>qoxB</i> | quinol oxidase subunit 1                                                |   |   | -1.580 | 0.000 | 0.000 | -1.679 | 0.000 | 0.000 |
| AS94_03745 | <i>qoxC</i> | cytochrome O ubiquinol oxidase                                          |   |   | -1.927 | 0.000 | 0.000 | -2.104 | 0.000 | 0.000 |
| AS94_03750 | <i>qoxD</i> | quinol oxidase subunit 4                                                |   |   | -2.152 | 0.000 | 0.000 | -2.221 | 0.000 | 0.000 |
| AS94_03760 |             | hypothetical protein                                                    |   |   | -0.324 | 0.012 | 0.027 | -0.488 | 0.000 | 0.001 |
| AS94_03775 |             | mannosyl-glycoprotein endo-beta-N-acetylglucosamidase                   |   |   | -0.453 | 0.000 | 0.000 | -0.465 | 0.000 | 0.000 |
| AS94_03780 |             | MarR family transcriptional regulator                                   |   |   | -0.911 | 0.000 | 0.001 | -0.851 | 0.001 | 0.003 |
| AS94_03795 | <i>sspA</i> | glutamyl endopeptidase                                                  | Y | Y | -2.628 | 0.000 | 0.000 | -1.963 | 0.000 | 0.000 |
| AS94_03800 |             | cysteine protease                                                       |   |   | -2.378 | 0.000 | 0.000 | -1.563 | 0.000 | 0.000 |
| AS94_03810 | <i>menB</i> | dihydroxynaphthoic acid synthetase                                      |   |   | -1.448 | 0.000 | 0.000 | -1.479 | 0.000 | 0.000 |
| AS94_03815 | <i>menH</i> | 2-succinyl-6-hydroxy-2_ 4-cyclohexadiene-1-carboxylate synthase         |   |   | -1.214 | 0.000 | 0.000 | -1.194 | 0.000 | 0.000 |
| AS94_03820 | <i>menD</i> | 2-succinyl-5-enolpyruvyl-6-hydroxy-3-cyclohexene-1-carboxylate synthase |   |   | -0.629 | 0.000 | 0.000 | -0.691 | 0.000 | 0.000 |
| AS94_03835 |             | acetyltransferase                                                       |   |   | -0.811 | 0.000 | 0.000 | -0.783 | 0.000 | 0.000 |
| AS94_03870 |             | bacteriocin ABC transporter ATP-binding protein                         |   |   | -0.675 | 0.017 | 0.035 | -1.139 | 0.000 | 0.000 |
| AS94_03880 |             | bacteriocin-associated integral membrane protein                        |   |   | -0.751 | 0.000 | 0.001 | -0.742 | 0.000 | 0.001 |
| AS94_03900 |             | IDEAL domain protein                                                    |   |   | -0.938 | 0.000 | 0.000 | -1.069 | 0.000 | 0.000 |
| AS94_03940 |             | peptide chain release factor 1                                          |   |   | -0.321 | 0.003 | 0.008 | -0.332 | 0.002 | 0.006 |
| AS94_03995 |             | magnesium transporter MgtE                                              |   |   | -0.344 | 0.014 | 0.029 | -0.459 | 0.001 | 0.003 |
| AS94_04005 |             | inorganic polyphosphate/ATP-NAD kinase                                  |   |   | -0.574 | 0.000 | 0.000 | -0.707 | 0.000 | 0.000 |
| AS94_04010 |             | GTP pyrophosphokinase                                                   |   |   | -0.890 | 0.000 | 0.000 | -0.940 | 0.000 | 0.000 |
| AS94_04045 |             | competence negative regulator MecA                                      |   |   | -0.638 | 0.000 | 0.000 | -0.782 | 0.000 | 0.000 |
| AS94_04130 |             | MAP domain protein                                                      |   |   | -0.945 | 0.000 | 0.000 | -0.687 | 0.000 | 0.000 |

|            |             |                                                |        |       |       |        |       |       |
|------------|-------------|------------------------------------------------|--------|-------|-------|--------|-------|-------|
| AS94_04175 |             | hypothetical protein                           | -0.811 | 0.000 | 0.000 | -0.821 | 0.000 | 0.000 |
| AS94_04180 |             | ATP-dependent DNA helicase subunit A           | -0.772 | 0.000 | 0.000 | -0.776 | 0.000 | 0.000 |
| AS94_04185 |             | ATP-dependent DNA helicase subunit B           | -0.815 | 0.000 | 0.000 | -0.820 | 0.000 | 0.000 |
| AS94_04215 | <i>pgi</i>  | glucose-6-phosphate isomerase                  | -0.374 | 0.002 | 0.006 | -0.359 | 0.004 | 0.009 |
| AS94_04230 |             | glycerophosphoryl diester<br>phosphodiesterase | -0.606 | 0.000 | 0.001 | -0.461 | 0.006 | 0.014 |
| AS94_04245 |             | NADH-dependent flavin oxidoreductase           | -0.844 | 0.000 | 0.000 | -0.989 | 0.000 | 0.000 |
| AS94_04285 |             | cation:proton antiporter                       | -0.574 | 0.015 | 0.032 | -0.918 | 0.000 | 0.000 |
| AS94_04290 |             | cation:proton antiporter                       | -2.171 | 0.000 | 0.000 | -2.248 | 0.000 | 0.000 |
| AS94_04295 |             | cation:proton antiporter                       | -0.808 | 0.002 | 0.005 | -1.343 | 0.000 | 0.000 |
| AS94_04300 |             | hypothetical protein                           | -1.823 | 0.000 | 0.000 | -1.642 | 0.000 | 0.000 |
| AS94_04305 |             | thioesterase                                   | -0.775 | 0.000 | 0.000 | -0.828 | 0.000 | 0.000 |
| AS94_04310 |             | sodium:proton antiporter                       | -0.610 | 0.001 | 0.001 | -0.666 | 0.000 | 0.001 |
| AS94_04325 |             | hypothetical protein                           | -0.429 | 0.004 | 0.010 | -0.530 | 0.000 | 0.001 |
| AS94_04345 |             | nitrogen-fixing protein NifU                   | -0.560 | 0.001 | 0.002 | -0.444 | 0.007 | 0.017 |
| AS94_04375 | <i>gyaR</i> | 2-ketogluconate reductase                      | -0.394 | 0.009 | 0.021 | -0.674 | 0.000 | 0.000 |
| AS94_04505 |             | arsenate reductase                             | -0.914 | 0.000 | 0.000 | -0.880 | 0.000 | 0.000 |
| AS94_04510 |             | thioredoxin                                    | -0.347 | 0.008 | 0.018 | -0.428 | 0.001 | 0.003 |
| AS94_04560 |             | membrane protein                               | -2.763 | 0.000 | 0.000 | -2.984 | 0.000 | 0.000 |
| AS94_04580 |             | cold-shock protein                             | -0.742 | 0.000 | 0.000 | -0.527 | 0.000 | 0.000 |
| AS94_04585 |             | thermonuclease                                 | -1.632 | 0.000 | 0.000 | -1.211 | 0.000 | 0.000 |
| AS94_04630 | <i>entK</i> | enterotoxin I                                  | -1.137 | 0.000 | 0.000 | -0.795 | 0.000 | 0.000 |
| AS94_04645 |             | hypothetical protein                           | -0.575 | 0.000 | 0.000 | -0.548 | 0.000 | 0.000 |
| AS94_04660 |             | transposase                                    | -0.990 | 0.000 | 0.000 | -0.890 | 0.000 | 0.000 |
| AS94_04665 |             | transposase                                    | -0.790 | 0.001 | 0.002 | -0.806 | 0.001 | 0.002 |
| AS94_04700 |             | deacetylase                                    | -0.329 | 0.012 | 0.026 | -0.546 | 0.000 | 0.000 |
| AS94_04710 | <i>nagB</i> | glucosamine-6-phosphate deaminase              | -0.712 | 0.000 | 0.000 | -0.606 | 0.000 | 0.001 |
| AS94_04720 | <i>hxlB</i> | 6-phospho 3-hexuloisomerase                    | -0.333 | 0.008 | 0.017 | -0.395 | 0.001 | 0.004 |
| AS94_04760 |             | pyridoxal kinase                               | -0.486 | 0.000 | 0.000 | -0.711 | 0.000 | 0.000 |

|            |             |                                                        |        |       |       |        |       |       |
|------------|-------------|--------------------------------------------------------|--------|-------|-------|--------|-------|-------|
| AS94_04890 | <i>adh</i>  | acetaldehyde reductase                                 | -0.374 | 0.016 | 0.034 | -0.664 | 0.000 | 0.000 |
| AS94_04970 | <i>cysK</i> | cysteine synthase                                      | -0.320 | 0.005 | 0.011 | -0.317 | 0.005 | 0.012 |
| AS94_04975 |             | heat shock protein Hsp33                               | -0.609 | 0.000 | 0.000 | -0.765 | 0.000 | 0.000 |
| AS94_04995 |             | hypothetical protein                                   | -0.584 | 0.000 | 0.000 | -0.507 | 0.000 | 0.000 |
| AS94_05010 |             | nucleotide pyrophosphohydrolase                        | -0.656 | 0.000 | 0.000 | -0.789 | 0.000 | 0.000 |
| AS94_05035 | <i>prs</i>  | ribose-phosphate pyrophosphokinase                     | -0.407 | 0.000 | 0.000 | -0.428 | 0.000 | 0.000 |
| AS94_05085 | <i>metG</i> | methionyl-tRNA synthetase                              | -0.427 | 0.000 | 0.000 | -0.471 | 0.000 | 0.000 |
| AS94_05105 |             | DNA replication protein YabA                           | -0.878 | 0.000 | 0.000 | -0.852 | 0.000 | 0.000 |
| AS94_05110 |             | signal peptidase II                                    | -0.474 | 0.000 | 0.001 | -0.417 | 0.001 | 0.003 |
| AS94_05120 |             | hypothetical protein                                   | -0.758 | 0.000 | 0.000 | -0.742 | 0.000 | 0.000 |
| AS94_05125 | <i>tmk</i>  | thymidylate kinase                                     | -0.806 | 0.000 | 0.000 | -0.973 | 0.000 | 0.000 |
| AS94_05130 |             | lysine decarboxylase                                   | -0.873 | 0.000 | 0.000 | -0.729 | 0.000 | 0.000 |
| AS94_05155 |             | hypothetical protein                                   | -0.494 | 0.001 | 0.002 | -0.915 | 0.000 | 0.000 |
| AS94_05290 |             | integrase                                              | -0.360 | 0.019 | 0.039 | -0.353 | 0.021 | 0.045 |
| AS94_05410 |             | transposase                                            | -2.153 | 0.000 | 0.000 | -2.258 | 0.000 | 0.000 |
| AS94_05425 |             | hypothetical protein                                   | -0.668 | 0.002 | 0.006 | -0.577 | 0.009 | 0.021 |
| AS94_05440 |             | NA                                                     | -0.518 | 0.015 | 0.032 | -0.566 | 0.008 | 0.018 |
| AS94_05445 |             | chromosome partitioning protein ParA                   | -0.481 | 0.000 | 0.000 | -0.550 | 0.000 | 0.000 |
| AS94_05500 |             | iron citrate ABC transporter substrate-binding protein | -1.581 | 0.000 | 0.000 | -1.250 | 0.000 | 0.000 |
| AS94_05555 |             | alcohol dehydrogenase                                  | -0.797 | 0.000 | 0.000 | -0.802 | 0.000 | 0.000 |
| AS94_05560 |             | alcohol dehydrogenase                                  | -0.755 | 0.000 | 0.000 | -0.805 | 0.000 | 0.000 |
| AS94_05570 | <i>lacG</i> | 6-phospho-beta-galactosidase                           | -2.586 | 0.000 | 0.000 | -2.188 | 0.000 | 0.000 |
| AS94_05575 | <i>lacE</i> | PTS lactose transporter subunit IIBC                   | -2.334 | 0.000 | 0.000 | -1.592 | 0.000 | 0.000 |
| AS94_05580 | <i>lacF</i> | PTS lactose transporter subunit IIA                    | -3.043 | 0.000 | 0.000 | -1.933 | 0.000 | 0.000 |
| AS94_05585 | <i>lacD</i> | tagatose-bisphosphate aldolase                         | -2.569 | 0.000 | 0.000 | -1.762 | 0.000 | 0.000 |
| AS94_05590 | <i>lacC</i> | tagatose-6-phosphate kinase                            | -2.374 | 0.000 | 0.000 | -1.519 | 0.000 | 0.000 |
| AS94_05595 | <i>lacB</i> | galactose-6-phosphate isomerase                        | -2.300 | 0.000 | 0.000 | -1.210 | 0.000 | 0.000 |
| AS94_05600 | <i>lacA</i> | galactose-6-phosphate isomerase                        | -2.599 | 0.000 | 0.000 | -1.840 | 0.000 | 0.000 |

|            |                  |                                                           |   |        |       |       |        |       |       |
|------------|------------------|-----------------------------------------------------------|---|--------|-------|-------|--------|-------|-------|
| AS94_05605 |                  | DeoR family transcriptional regulator                     |   | -0.556 | 0.002 | 0.004 | -0.556 | 0.002 | 0.004 |
| AS94_05615 |                  | 2_5-diketo-D-gluconic acid reductase                      |   | -0.809 | 0.000 | 0.000 | -0.966 | 0.000 | 0.000 |
| AS94_05655 | <i>budA</i>      | alpha-acetolactate decarboxylase                          | Y | -2.037 | 0.000 | 0.000 | -2.048 | 0.000 | 0.000 |
| AS94_05660 | <i>alsS</i>      | acetolactate synthase                                     |   | -2.320 | 0.000 | 0.000 | -2.238 | 0.000 | 0.000 |
| AS94_05705 |                  | cobalt ABC transporter ATP-binding protein                |   | -0.473 | 0.005 | 0.013 | -0.542 | 0.001 | 0.004 |
| AS94_05870 |                  | GNAT family acetyltransferase                             |   | -0.873 | 0.000 | 0.000 | -0.834 | 0.000 | 0.000 |
| AS94_05880 |                  | malonate transporter                                      |   | -0.768 | 0.000 | 0.000 | -0.922 | 0.000 | 0.000 |
| AS94_05890 |                  | membrane protein                                          |   | -0.495 | 0.001 | 0.003 | -0.586 | 0.000 | 0.000 |
| AS94_05920 |                  | MarR family transcriptional regulator                     |   | -0.444 | 0.013 | 0.028 | -0.607 | 0.001 | 0.002 |
| AS94_05930 | <i>moaA</i>      | molybdenum cofactor biosynthesis protein A                |   | -0.594 | 0.000 | 0.000 | -0.841 | 0.000 | 0.000 |
| AS94_05935 |                  | molybdopterin-guanine dinucleotide biosynthesis protein A |   | -0.681 | 0.000 | 0.000 | -0.839 | 0.000 | 0.000 |
| AS94_05945 | <i>moaE</i>      | molybdopterin synthase subunit 2                          |   | -1.051 | 0.000 | 0.000 | -1.042 | 0.000 | 0.000 |
| AS94_05950 |                  | molybdopterin-guanine dinucleotide biosynthesis protein B |   | -0.667 | 0.001 | 0.003 | -0.747 | 0.000 | 0.001 |
| AS94_05955 | <i>moeA</i>      | molybdopterin molybdenumtransferase                       |   | -1.838 | 0.000 | 0.000 | -1.877 | 0.000 | 0.000 |
| AS94_05960 | <i>moaC</i>      | molybdenum cofactor biosynthesis protein C                |   | -1.334 | 0.000 | 0.000 | -1.289 | 0.000 | 0.000 |
| AS94_05965 | <i>moaB</i>      | molybdenum cofactor biosynthesis protein B                |   | -1.780 | 0.000 | 0.000 | -1.775 | 0.000 | 0.000 |
| AS94_05970 | <i>moeZ/MoeB</i> | molybdopterin biosynthesis protein MoeB                   |   | -1.371 | 0.000 | 0.000 | -1.200 | 0.000 | 0.000 |
| AS94_05975 |                  | molybdenum ABC transporter ATP-binding protein            |   | -1.366 | 0.000 | 0.000 | -1.476 | 0.000 | 0.000 |
| AS94_05980 | <i>modB</i>      | molybdenum ABC transporter permease                       |   | -1.152 | 0.000 | 0.000 | -1.250 | 0.000 | 0.000 |
| AS94_05985 | <i>modA</i>      | molybdenum ABC transporter substrate-binding protein      |   | -0.692 | 0.000 | 0.000 | -0.388 | 0.015 | 0.034 |
| AS94_05990 |                  | formate dehydrogenase subunit D                           |   | -0.503 | 0.001 | 0.003 | -0.884 | 0.000 | 0.000 |
| AS94_06010 |                  | ferrichrome ABC transporter substrate-binding protein     |   | -0.679 | 0.000 | 0.000 | -0.714 | 0.000 | 0.000 |
| AS94_06015 |                  | acyl-CoA dehydrogenase                                    |   | -0.545 | 0.001 | 0.001 | -0.473 | 0.003 | 0.007 |
| AS94_06020 |                  | urea transporter                                          |   | -1.505 | 0.000 | 0.000 | -1.519 | 0.000 | 0.000 |
| AS94_06025 | <i>ureA</i>      | urease subunit gamma                                      | Y | -1.562 | 0.005 | 0.011 | -1.313 | 0.018 | 0.039 |
| AS94_06030 | <i>ureB</i>      | urease subunit beta                                       | Y | -1.691 | 0.000 | 0.001 | -1.604 | 0.001 | 0.001 |



|            |             |                                              |   |        |       |       |        |       |       |
|------------|-------------|----------------------------------------------|---|--------|-------|-------|--------|-------|-------|
| AS94_06035 | <i>ureC</i> | urease subunit alpha                         | Y | -1.091 | 0.000 | 0.000 | -1.104 | 0.000 | 0.000 |
| AS94_06040 |             | urease accessory protein UreE                |   | -1.128 | 0.000 | 0.000 | -0.692 | 0.022 | 0.047 |
| AS94_06045 |             | urease accessory protein UreF                |   | -1.047 | 0.000 | 0.000 | -1.080 | 0.000 | 0.000 |
| AS94_06050 |             | urease accessory protein UreG                |   | -1.179 | 0.000 | 0.000 | -1.076 | 0.000 | 0.000 |
| AS94_06055 |             | urease accessory protein UreD                |   | -1.412 | 0.000 | 0.000 | -1.468 | 0.000 | 0.000 |
| AS94_06060 |             | MarR family transcriptional regulator        |   | -0.661 | 0.000 | 0.000 | -0.752 | 0.000 | 0.000 |
| AS94_06065 |             | hypothetical protein                         |   | -0.937 | 0.000 | 0.000 | -0.700 | 0.000 | 0.000 |
| AS94_06070 |             | transcriptional regulator                    |   | -0.659 | 0.018 | 0.038 | -0.654 | 0.020 | 0.042 |
| AS94_06100 |             | hypothetical protein                         |   | -0.665 | 0.000 | 0.000 | -1.172 | 0.000 | 0.000 |
| AS94_06110 |             | 2-hydroxyacid dehydrogenase                  |   | -1.462 | 0.000 | 0.000 | -1.415 | 0.000 | 0.000 |
| AS94_06115 |             | hypothetical protein                         |   | -0.734 | 0.000 | 0.000 | -0.777 | 0.000 | 0.000 |
| AS94_06130 |             | hypothetical protein                         |   | -0.935 | 0.000 | 0.000 | -1.438 | 0.000 | 0.000 |
| AS94_06135 |             | oxidoreductase                               |   | -0.524 | 0.000 | 0.000 | -0.751 | 0.000 | 0.000 |
| AS94_06155 |             | DeoR family transcriptional regulator        |   | -0.879 | 0.000 | 0.000 | -0.848 | 0.000 | 0.000 |
| AS94_06195 |             | HAD family hydrolase                         |   | -0.592 | 0.005 | 0.012 | -0.655 | 0.002 | 0.005 |
| AS94_06210 |             | PTS alpha-glucoside transporter subunit IIBC |   | -2.524 | 0.000 | 0.000 | -2.416 | 0.000 | 0.000 |
| AS94_06225 |             | sodium:proton antiporter                     |   | -0.460 | 0.003 | 0.008 | -0.555 | 0.000 | 0.001 |
| AS94_06235 |             | oxidoreductase                               |   | -0.298 | 0.012 | 0.026 | -0.582 | 0.000 | 0.000 |
| AS94_06265 |             | lysostaphin resistance protein A             |   | -0.451 | 0.001 | 0.002 | -0.943 | 0.000 | 0.000 |
| AS94_06270 | <i>rpiA</i> | ribose 5-phosphate isomerase                 |   | -0.857 | 0.000 | 0.000 | -1.125 | 0.000 | 0.000 |
| AS94_06275 |             | molybdenum cofactor biosynthesis protein     |   | -0.550 | 0.002 | 0.006 | -0.831 | 0.000 | 0.000 |
| AS94_06280 |             | aldose 1-epimerase                           |   | -0.555 | 0.000 | 0.001 | -0.382 | 0.015 | 0.033 |
| AS94_06285 |             | membrane protein                             |   | -0.764 | 0.001 | 0.001 | -0.525 | 0.018 | 0.040 |
| AS94_06305 |             | 3-methyladenine DNA glycosylase              |   | -1.074 | 0.000 | 0.000 | -1.077 | 0.000 | 0.000 |
| AS94_06315 | <i>fni</i>  | isopentenyl pyrophosphate isomerase          |   | -0.523 | 0.000 | 0.000 | -0.522 | 0.000 | 0.000 |
| AS94_06380 |             | hemin ABC transporter ATP-binding protein    |   | -2.343 | 0.000 | 0.000 | -2.303 | 0.000 | 0.000 |
| AS94_06385 |             | hemin ABC transporter permease               |   | -2.331 | 0.000 | 0.000 | -2.441 | 0.000 | 0.000 |
| AS94_06390 |             | heme transporter CcmC                        |   | -0.866 | 0.001 | 0.003 | -0.871 | 0.001 | 0.003 |

|            |             |                                                |   |        |       |       |        |       |       |
|------------|-------------|------------------------------------------------|---|--------|-------|-------|--------|-------|-------|
| AS94_06395 |             | sensor histidine kinase                        |   | -1.154 | 0.000 | 0.000 | -1.345 | 0.000 | 0.000 |
| AS94_06420 |             | antibiotic ABC transporter permease            |   | -0.928 | 0.003 | 0.007 | -1.124 | 0.000 | 0.001 |
| AS94_06445 |             | acetyltransferase                              |   | -0.846 | 0.001 | 0.002 | -0.746 | 0.003 | 0.007 |
| AS94_06460 |             | GNAT family acetyltransferase                  |   | -0.981 | 0.000 | 0.000 | -1.040 | 0.000 | 0.000 |
| AS94_06465 |             | ferredoxin--NADP reductase                     |   | -1.499 | 0.000 | 0.000 | -1.362 | 0.000 | 0.000 |
| AS94_06490 |             | PTS sucrose transporter subunit IIBC           |   | -2.511 | 0.000 | 0.000 | -2.418 | 0.000 | 0.000 |
| AS94_06550 | <i>nreC</i> | LuxR family transcriptional regulator          | Y | -0.772 | 0.000 | 0.000 | -0.798 | 0.000 | 0.000 |
| AS94_06555 | <i>nreB</i> | sensor histidine kinase                        | Y | -0.758 | 0.000 | 0.000 | -0.531 | 0.000 | 0.000 |
| AS94_06560 |             | nreA protein                                   |   | -0.869 | 0.000 | 0.000 | -0.653 | 0.000 | 0.000 |
| AS94_06565 | <i>narI</i> | nitrate reductase subunit gamma                | Y | -0.879 | 0.000 | 0.000 | -0.839 | 0.000 | 0.000 |
| AS94_06570 | <i>narJ</i> | nitrate reductase sununit delta                | Y | -1.490 | 0.000 | 0.000 | -1.421 | 0.000 | 0.000 |
| AS94_06575 | <i>narH</i> | nitrate reductase                              | Y | -0.998 | 0.000 | 0.000 | -0.926 | 0.000 | 0.000 |
| AS94_06580 |             | nitrate reductase                              |   | -1.111 | 0.000 | 0.000 | -0.997 | 0.000 | 0.000 |
| AS94_06585 | <i>cobA</i> | uroporphyrinogen III methyltransferase         |   | -1.230 | 0.000 | 0.000 | -1.445 | 0.000 | 0.000 |
| AS94_06590 | <i>nirD</i> | nitrite reductase NAD(P)H small subunit        |   | -0.916 | 0.000 | 0.001 | -1.350 | 0.000 | 0.000 |
| AS94_06595 | <i>nirB</i> | nitrite reductase                              |   | -1.216 | 0.000 | 0.000 | -1.209 | 0.000 | 0.000 |
| AS94_06600 |             | cobalamin biosynthesis protein CbiX            |   | -1.105 | 0.000 | 0.000 | -0.901 | 0.000 | 0.000 |
| AS94_06625 | <i>yodA</i> | zinc ABC transporter substrate-binding protein |   | -0.421 | 0.007 | 0.016 | -0.361 | 0.021 | 0.045 |
| AS94_06630 |             | protein-disulfide isomerase                    |   | -0.766 | 0.000 | 0.000 | -0.496 | 0.011 | 0.025 |
| AS94_06665 |             | hypothetical protein                           |   | -1.160 | 0.001 | 0.002 | -1.387 | 0.000 | 0.000 |
| AS94_06745 |             | hypothetical protein                           |   | -1.320 | 0.000 | 0.001 | -1.690 | 0.000 | 0.000 |
| AS94_06765 |             | bicyclomycin transporter TcaB                  |   | -0.428 | 0.001 | 0.003 | -0.481 | 0.000 | 0.001 |
| AS94_06775 |             | hypothetical protein                           |   | -0.705 | 0.000 | 0.000 | -0.616 | 0.000 | 0.000 |
| AS94_06795 |             | amino acid permease                            |   | -1.054 | 0.000 | 0.000 | -1.036 | 0.000 | 0.000 |
| AS94_06805 |             | epimerase                                      |   | -0.584 | 0.000 | 0.000 | -0.751 | 0.000 | 0.000 |
| AS94_06810 |             | 2-dehydropantoate 2-reductase                  |   | -1.502 | 0.000 | 0.000 | -1.571 | 0.000 | 0.000 |
| AS94_06815 |             | quinolone resistance protein NorB              |   | -0.820 | 0.000 | 0.000 | -1.012 | 0.000 | 0.000 |
| AS94_06820 |             | amino acid ABC transporter permease            |   | -1.528 | 0.000 | 0.000 | -1.689 | 0.000 | 0.000 |

|            |              |                                                              |   |        |       |       |        |       |       |
|------------|--------------|--------------------------------------------------------------|---|--------|-------|-------|--------|-------|-------|
| AS94_06825 | <i>opuCC</i> | glycine/betaine ABC transporter<br>substrate-binding protein |   | -1.462 | 0.000 | 0.000 | -1.528 | 0.000 | 0.000 |
| AS94_06830 |              | choline ABC transporter permease                             |   | -0.926 | 0.000 | 0.000 | -0.835 | 0.000 | 0.000 |
| AS94_06835 | <i>proV</i>  | glycine/betaine ABC transporter ATP-<br>binding protein      |   | -1.096 | 0.000 | 0.000 | -0.801 | 0.000 | 0.000 |
| AS94_06840 |              | hypothetical protein                                         |   | -0.818 | 0.000 | 0.000 | -0.705 | 0.000 | 0.000 |
| AS94_06845 |              | amino acid:proton symporter                                  |   | -0.696 | 0.000 | 0.000 | -0.948 | 0.000 | 0.000 |
| AS94_06860 |              | membrane protein                                             |   | -0.668 | 0.000 | 0.000 | -0.989 | 0.000 | 0.000 |
| AS94_06870 |              | peptidase M28                                                |   | -1.188 | 0.000 | 0.000 | -1.211 | 0.000 | 0.000 |
| AS94_06875 |              | hypothetical protein                                         |   | -0.995 | 0.000 | 0.000 | -0.858 | 0.000 | 0.000 |
| AS94_06985 |              | hypothetical protein                                         |   | -1.655 | 0.000 | 0.000 | -1.486 | 0.000 | 0.000 |
| AS94_06990 |              | hypothetical protein                                         |   | -0.980 | 0.000 | 0.000 | -1.159 | 0.000 | 0.000 |
| AS94_06995 |              | hypothetical protein                                         |   | -1.651 | 0.000 | 0.000 | -1.505 | 0.000 | 0.000 |
| AS94_07000 |              | hypothetical protein                                         |   | -0.944 | 0.000 | 0.000 | -0.845 | 0.000 | 0.000 |
| AS94_07010 |              | hypothetical protein                                         |   | -0.929 | 0.000 | 0.000 | -0.764 | 0.000 | 0.000 |
| AS94_07050 | <i>galU</i>  | UTP--glucose-1-phosphate<br>uridylyltransferase              |   | -0.864 | 0.000 | 0.000 | -0.790 | 0.000 | 0.000 |
| AS94_07055 | <i>fnbA</i>  | fibronectin-binding protein A                                | Y | -0.675 | 0.000 | 0.000 | -0.561 | 0.000 | 0.001 |
| AS94_07065 |              | gluconate permease                                           |   | -1.314 | 0.000 | 0.000 | -1.153 | 0.000 | 0.000 |
| AS94_07070 | <i>gntK</i>  | gluconokinase                                                | Y | -0.704 | 0.000 | 0.000 | -0.317 | 0.005 | 0.012 |
| AS94_07080 |              | MerR family transcriptional regulator                        |   | -1.248 | 0.000 | 0.000 | -1.302 | 0.000 | 0.000 |
| AS94_07120 | <i>fbp</i>   | fructose-1_6-bisphosphatase                                  |   | -0.684 | 0.000 | 0.000 | -0.619 | 0.000 | 0.000 |
| AS94_07130 |              | carboxylesterase                                             |   | -1.216 | 0.000 | 0.000 | -1.161 | 0.000 | 0.000 |
| AS94_07135 |              | glyoxalase                                                   |   | -0.813 | 0.000 | 0.000 | -0.723 | 0.000 | 0.001 |
| AS94_07140 |              | MarR family transcriptional regulator                        |   | -1.298 | 0.000 | 0.000 | -1.147 | 0.000 | 0.000 |
| AS94_07145 |              | acetyltransferase                                            |   | -0.474 | 0.006 | 0.015 | -0.394 | 0.024 | 0.050 |
| AS94_07150 |              | glyoxalase                                                   |   | -0.476 | 0.003 | 0.008 | -0.546 | 0.001 | 0.002 |
| AS94_07155 |              | NAD(P)H nitroreductase                                       |   | -0.572 | 0.000 | 0.000 | -0.788 | 0.000 | 0.000 |
| AS94_07165 |              | HAD family hydrolase                                         |   | -0.690 | 0.000 | 0.001 | -0.712 | 0.000 | 0.001 |
| AS94_07215 |              | esterase                                                     |   | -1.153 | 0.000 | 0.000 | -1.431 | 0.000 | 0.000 |
| AS94_07225 |              | acyl-CoA thioester hydrolase                                 |   | -1.124 | 0.000 | 0.000 | -1.027 | 0.000 | 0.000 |

|            |             |                                                         |   |        |       |       |        |       |       |
|------------|-------------|---------------------------------------------------------|---|--------|-------|-------|--------|-------|-------|
| AS94_07230 | <i>glcB</i> | PTS glucose transporter subunit IIABC                   |   | -1.180 | 0.000 | 0.000 | -1.206 | 0.000 | 0.000 |
| AS94_07235 |             | pyruvate oxidase                                        |   | -0.789 | 0.000 | 0.000 | -1.038 | 0.000 | 0.000 |
| AS94_07240 |             | holin                                                   |   | -0.434 | 0.000 | 0.001 | -0.753 | 0.000 | 0.000 |
| AS94_07245 |             | holin                                                   |   | -2.360 | 0.000 | 0.000 | -2.964 | 0.000 | 0.000 |
| AS94_07265 |             | hydroxymethylglutaryl-CoA reductase                     |   | -0.342 | 0.008 | 0.018 | -0.320 | 0.013 | 0.029 |
| AS94_07275 |             | methylated DNA-protein cysteine S-methyltransferase     |   | -0.767 | 0.000 | 0.000 | -0.863 | 0.000 | 0.000 |
| AS94_07395 |             | TetR family transcriptional regulator                   |   | -0.747 | 0.001 | 0.002 | -0.849 | 0.000 | 0.000 |
| AS94_07475 |             | fructosamine-3-kinase                                   |   | -0.562 | 0.000 | 0.000 | -0.860 | 0.000 | 0.000 |
| AS94_07510 | <i>panD</i> | aspartate decarboxylase                                 |   | -0.527 | 0.001 | 0.003 | -0.460 | 0.004 | 0.011 |
| AS94_07515 | <i>panC</i> | pantoate--beta-alanine ligase                           |   | -0.395 | 0.003 | 0.006 | -0.400 | 0.002 | 0.006 |
| AS94_07520 | <i>panB</i> | 3-methyl-2-oxobutanoate hydroxymethyltransferase        |   | -0.444 | 0.005 | 0.012 | -0.432 | 0.006 | 0.015 |
| AS94_07530 | <i>budA</i> | alpha-acetolactate decarboxylase                        | Y | -0.837 | 0.000 | 0.000 | -0.857 | 0.000 | 0.000 |
| AS94_07560 | <i>mgo</i>  | malate:quinone oxidoreductase                           |   | -0.437 | 0.000 | 0.000 | -0.522 | 0.000 | 0.000 |
| AS94_07570 |             | acyl--CoA ligase                                        |   | -0.676 | 0.000 | 0.000 | -0.782 | 0.000 | 0.000 |
| AS94_07590 | <i>betB</i> | betaine-aldehyde dehydrogenase                          | Y | -0.445 | 0.003 | 0.008 | -0.668 | 0.000 | 0.000 |
| AS94_07595 |             | hypothetical protein                                    |   | -0.387 | 0.019 | 0.040 | -0.542 | 0.001 | 0.003 |
| AS94_07600 |             | choline transporter BetT                                |   | -0.433 | 0.008 | 0.017 | -0.655 | 0.000 | 0.000 |
| AS94_07605 |             | ribonucleoside-triphosphate reductase activatingprotein |   | -0.633 | 0.000 | 0.000 | -0.894 | 0.000 | 0.000 |
| AS94_07620 |             | precorrin-2 dehydrogenase                               |   | -0.640 | 0.000 | 0.000 | -0.828 | 0.000 | 0.000 |
| AS94_07625 |             | sulfite reductase subunit alpha                         |   | -0.583 | 0.000 | 0.000 | -0.734 | 0.000 | 0.000 |
| AS94_07635 |             | peptide ABC transporter permease                        |   | -0.610 | 0.000 | 0.001 | -0.667 | 0.000 | 0.000 |
| AS94_07675 |             | tributyryn esterase                                     |   | -0.817 | 0.000 | 0.000 | -0.758 | 0.000 | 0.000 |
| AS94_07685 |             | hypothetical protein                                    |   | -0.997 | 0.001 | 0.002 | -0.966 | 0.001 | 0.003 |
| AS94_07690 |             | type I restriction endonuclease subunit S               |   | -0.999 | 0.000 | 0.000 | -0.853 | 0.000 | 0.000 |
| AS94_07700 |             | RNA helicase                                            |   | -0.925 | 0.000 | 0.000 | -0.913 | 0.000 | 0.000 |
| AS94_07710 |             | hypothetical protein                                    |   | -0.768 | 0.000 | 0.000 | -0.729 | 0.000 | 0.000 |
| AS94_07715 |             | hypothetical protein                                    |   | -1.180 | 0.000 | 0.000 | -1.049 | 0.000 | 0.000 |
| AS94_07720 |             | transposase                                             |   | -0.856 | 0.000 | 0.000 | -0.737 | 0.000 | 0.000 |

|            |             |                                                       |        |       |       |        |       |       |
|------------|-------------|-------------------------------------------------------|--------|-------|-------|--------|-------|-------|
| AS94_07800 |             | Vitamin B12 ABC transporter substrate-binding protein | -0.665 | 0.000 | 0.000 | -0.516 | 0.003 | 0.007 |
| AS94_07810 |             | HAD family hydrolase                                  | -0.757 | 0.000 | 0.001 | -0.742 | 0.001 | 0.002 |
| AS94_07815 |             | alpha/beta hydrolase                                  | -0.934 | 0.000 | 0.000 | -1.002 | 0.000 | 0.000 |
| AS94_07820 |             | hypothetical protein                                  | -1.127 | 0.000 | 0.000 | -1.548 | 0.000 | 0.000 |
| AS94_07925 |             | N-acetylmannosaminyltransferase                       | -0.491 | 0.004 | 0.009 | -0.587 | 0.001 | 0.002 |
| AS94_07930 | <i>tagH</i> | teichoic acid ABC transporter ATP-binding protein     | -0.445 | 0.000 | 0.001 | -0.565 | 0.000 | 0.000 |
| AS94_07965 |             | nucleoside permease                                   | -0.894 | 0.000 | 0.000 | -0.908 | 0.000 | 0.000 |
| AS94_07975 |             | iron-dicitrate ABC transporter ATP-binding protein    | -1.143 | 0.000 | 0.000 | -0.977 | 0.000 | 0.000 |
| AS94_07980 |             | ferrichrome ABC transporter permease                  | -1.020 | 0.000 | 0.000 | -0.894 | 0.000 | 0.000 |
| AS94_07985 |             | iron ABC transporter permease                         | -1.089 | 0.000 | 0.000 | -0.956 | 0.000 | 0.000 |
| AS94_07995 | <i>dhaL</i> | dihydroxyacetone kinase subunit L                     | -0.684 | 0.000 | 0.000 | -0.536 | 0.000 | 0.001 |
| AS94_08000 | <i>dhaM</i> | PTS mannose transporter subunit IIA                   | -1.387 | 0.000 | 0.000 | -1.151 | 0.000 | 0.000 |
| AS94_08005 |             | hypothetical protein                                  | -0.456 | 0.000 | 0.001 | -0.573 | 0.000 | 0.000 |
| AS94_08025 |             | acetyltransferase                                     | -0.866 | 0.000 | 0.000 | -0.890 | 0.000 | 0.000 |
| AS94_08030 |             | 3-beta hydroxysteroid dehydrogenase                   | -0.466 | 0.001 | 0.004 | -0.508 | 0.001 | 0.002 |
| AS94_08050 |             | bacitracin ABC transporter permease                   | -0.704 | 0.000 | 0.000 | -0.764 | 0.000 | 0.000 |
| AS94_08065 |             | peptidase M23B                                        | -0.353 | 0.003 | 0.007 | -0.580 | 0.000 | 0.000 |
| AS94_08070 |             | inhibitor of apoptosis-promoting Bax1                 | -0.713 | 0.000 | 0.000 | -0.631 | 0.000 | 0.000 |
| AS94_08075 |             | AraC family transcriptional regulator                 | -0.876 | 0.000 | 0.000 | -0.966 | 0.000 | 0.000 |
| AS94_08080 |             | MarR family transcriptional regulator                 | -3.088 | 0.000 | 0.000 | -2.695 | 0.000 | 0.000 |
| AS94_08095 |             | hypothetical protein                                  | -0.639 | 0.000 | 0.000 | -0.547 | 0.000 | 0.000 |
| AS94_08100 |             | LysR family transcriptional regulator                 | -0.574 | 0.000 | 0.000 | -0.561 | 0.000 | 0.000 |
| AS94_08105 |             | sugar MFS transporter                                 | -0.567 | 0.000 | 0.000 | -0.643 | 0.000 | 0.000 |
| AS94_08170 |             | MarR family transcriptional regulator                 | -0.265 | 0.008 | 0.019 | -0.281 | 0.005 | 0.013 |
| AS94_08195 |             | deoxyribodipyrimidine photo-lyase                     | -0.283 | 0.011 | 0.024 | -0.334 | 0.003 | 0.007 |
| AS94_08220 |             | hypothetical protein                                  | -0.499 | 0.007 | 0.017 | -0.999 | 0.000 | 0.000 |
| AS94_08225 |             | YbaK/EbsC protein                                     | -1.377 | 0.000 | 0.000 | -1.240 | 0.000 | 0.000 |
| AS94_08240 | <i>fruA</i> | PTS fructose transporter subunit IIC                  | -0.562 | 0.000 | 0.000 | -0.450 | 0.002 | 0.005 |

|            |             |                                                    |        |       |       |        |       |       |
|------------|-------------|----------------------------------------------------|--------|-------|-------|--------|-------|-------|
| AS94_08335 |             | heme ABC transporter ATP-binding protein           | -0.953 | 0.000 | 0.000 | -0.778 | 0.000 | 0.000 |
| AS94_08340 | <i>recQ</i> | ATP-dependent DNA helicase RecQ                    | -1.423 | 0.000 | 0.000 | -1.288 | 0.000 | 0.000 |
| AS94_08370 |             | lipid kinase                                       | -0.310 | 0.006 | 0.015 | -0.758 | 0.000 | 0.000 |
| AS94_08390 |             | ribonucleotide reductase stimulatory protein       | -1.282 | 0.000 | 0.000 | -1.517 | 0.000 | 0.000 |
| AS94_08395 |             | ribonucleotide-diphosphate reductase subunit alpha | -0.892 | 0.000 | 0.000 | -1.064 | 0.000 | 0.000 |
| AS94_08405 |             | iron ABC transporter permease                      | -1.854 | 0.000 | 0.000 | -1.355 | 0.000 | 0.000 |
| AS94_08410 |             | iron ABC transporter permease                      | -1.730 | 0.000 | 0.000 | -1.251 | 0.001 | 0.003 |
| AS94_08485 |             | hypothetical protein                               | -1.288 | 0.000 | 0.000 | -1.285 | 0.000 | 0.000 |
| AS94_08530 | <i>uvrB</i> | excinuclease ABC subunit B                         | -0.825 | 0.000 | 0.000 | -0.839 | 0.000 | 0.000 |
| AS94_08565 |             | hypothetical protein                               | -0.438 | 0.019 | 0.040 | -0.585 | 0.002 | 0.005 |
| AS94_08620 | <i>gap</i>  | glyceraldehyde-3-phosphate dehydrogenase           | -0.363 | 0.002 | 0.004 | -0.583 | 0.000 | 0.000 |
| AS94_08635 | <i>gpmI</i> | phosphoglyceromutase                               | -0.365 | 0.004 | 0.009 | -0.415 | 0.001 | 0.003 |
| AS94_08640 | <i>eno</i>  | enolase                                            | -0.535 | 0.000 | 0.000 | -0.637 | 0.000 | 0.000 |
| AS94_08670 |             | hypothetical protein                               | -0.495 | 0.000 | 0.000 | -0.374 | 0.003 | 0.007 |
| AS94_08715 |             | virulence-associated protein E                     | -0.734 | 0.002 | 0.005 | -0.790 | 0.001 | 0.003 |
| AS94_08755 |             | pathogenicity island protein                       | -0.649 | 0.000 | 0.000 | -0.539 | 0.000 | 0.000 |
| AS94_08870 | <i>alr</i>  | alanine racemase                                   | -0.386 | 0.002 | 0.004 | -0.404 | 0.001 | 0.003 |
| AS94_08895 | <i>kdpC</i> | potassium-transporting ATPase subunit C            | -1.023 | 0.000 | 0.000 | -1.320 | 0.000 | 0.000 |
| AS94_08900 | <i>kdpB</i> | potassium-transporting ATPase subunit B            | -0.653 | 0.003 | 0.007 | -0.834 | 0.000 | 0.000 |
| AS94_08975 | <i>thiE</i> | thiamine-phosphate pyrophosphorylase               | -0.830 | 0.007 | 0.015 | -0.807 | 0.008 | 0.019 |
| AS94_08980 | <i>thiM</i> | hydroxyethylthiazole kinase                        | -0.881 | 0.013 | 0.027 | -0.824 | 0.020 | 0.043 |
| AS94_09000 | <i>ssb</i>  | single-stranded DNA-binding protein                | -1.486 | 0.000 | 0.000 | -0.931 | 0.002 | 0.005 |
| AS94_09140 | <i>fba</i>  | fructose-bisphosphate aldolase                     | -0.803 | 0.000 | 0.000 | -1.039 | 0.000 | 0.000 |
| AS94_09145 |             | hypothetical protein                               | -0.534 | 0.004 | 0.009 | -0.889 | 0.000 | 0.000 |
| AS94_09170 |             | hypothetical protein                               | -0.457 | 0.001 | 0.003 | -0.341 | 0.015 | 0.034 |
| AS94_09190 |             | membrane protein                                   | -1.187 | 0.000 | 0.000 | -1.295 | 0.000 | 0.000 |
| AS94_09195 | <i>pdp</i>  | pyrimidine-nucleoside phosphorylase                | -1.176 | 0.000 | 0.000 | -1.117 | 0.000 | 0.000 |

|            |             |                                                |        |       |       |        |       |       |
|------------|-------------|------------------------------------------------|--------|-------|-------|--------|-------|-------|
| AS94_09200 | <i>deoC</i> | deoxyribose-phosphate aldolase                 | -0.624 | 0.000 | 0.000 | -0.527 | 0.000 | 0.000 |
| AS94_09210 |             | general stress protein                         | -1.882 | 0.000 | 0.000 | -1.297 | 0.000 | 0.000 |
| AS94_09295 |             | FmtB protein                                   | -1.108 | 0.000 | 0.000 | -1.238 | 0.000 | 0.000 |
| AS94_09375 |             | MarR family transcriptional regulator          | -0.887 | 0.000 | 0.000 | -0.683 | 0.000 | 0.000 |
| AS94_09390 |             | iron ABC transporter substrate-binding protein | -1.246 | 0.000 | 0.000 | -1.066 | 0.001 | 0.002 |
| AS94_09415 |             | siderophore biosynthesis protein SbnE          | -0.589 | 0.020 | 0.041 | -0.589 | 0.020 | 0.044 |
| AS94_09455 |             | acetoin reductase                              | -1.696 | 0.000 | 0.000 | -1.887 | 0.000 | 0.000 |
| AS94_09485 |             | superoxide dismutase                           | -2.825 | 0.000 | 0.000 | -2.792 | 0.000 | 0.000 |
| AS94_09515 | <i>deoB</i> | phosphopentomutase                             | -0.774 | 0.000 | 0.000 | -0.973 | 0.000 | 0.000 |
| AS94_09545 |             | 2'_ 3'-cyclic nucleotide 2'-phosphodiesterase  | -1.076 | 0.000 | 0.000 | -1.224 | 0.000 | 0.000 |
| AS94_09640 | <i>isdI</i> | monooxygenase IsdI                             | -0.956 | 0.016 | 0.034 | -1.073 | 0.007 | 0.016 |
| AS94_09645 |             | hypothetical protein                           | -1.375 | 0.000 | 0.000 | -0.822 | 0.016 | 0.035 |
| AS94_09700 |             | 4'-phosphopantetheinyl transferase             | -0.897 | 0.000 | 0.000 | -0.669 | 0.000 | 0.000 |
| AS94_09705 |             | hypothetical protein                           | -1.027 | 0.000 | 0.000 | -0.977 | 0.000 | 0.000 |
| AS94_09735 |             | isochorismatase                                | -0.795 | 0.000 | 0.000 | -0.661 | 0.000 | 0.000 |
| AS94_09740 |             | pyruvate decarboxylase                         | -0.706 | 0.000 | 0.000 | -0.590 | 0.000 | 0.000 |
| AS94_09750 | <i>ptsG</i> | PTS glucose transporter subunit IIABC          | -1.301 | 0.000 | 0.000 | -1.286 | 0.000 | 0.000 |
| AS94_09785 | <i>nikE</i> | ABC transporter ATP-binding protein            | -1.287 | 0.000 | 0.000 | -1.172 | 0.000 | 0.000 |
| AS94_09815 |             | azoreductase                                   | -1.128 | 0.000 | 0.000 | -0.923 | 0.000 | 0.000 |
| AS94_09825 |             | sugar ABC transporter ATP-binding protein      | -1.195 | 0.000 | 0.000 | -0.998 | 0.000 | 0.001 |
| AS94_09830 |             | ABC transporter substrate-binding protein      | -1.413 | 0.000 | 0.000 | -1.004 | 0.000 | 0.000 |
| AS94_09835 |             | arabinogalactan ABC transporter permease       | -1.200 | 0.000 | 0.000 | -0.991 | 0.000 | 0.000 |
| AS94_09840 |             | arabinogalactan ABC transporter permease       | -1.501 | 0.000 | 0.000 | -1.504 | 0.000 | 0.000 |
| AS94_09845 |             | oxidoreductase                                 | -2.229 | 0.000 | 0.000 | -1.963 | 0.000 | 0.000 |
| AS94_09850 |             | NADH-dependent dehydrogenase                   | -2.559 | 0.000 | 0.000 | -2.303 | 0.000 | 0.000 |
| AS94_09855 |             | xylose isomerase                               | -2.694 | 0.000 | 0.000 | -2.370 | 0.000 | 0.000 |
| AS94_09870 |             | AraC family transcriptional regulator          | -1.041 | 0.000 | 0.000 | -1.307 | 0.000 | 0.000 |

|            |             |                                                                  |   |        |       |       |        |       |       |
|------------|-------------|------------------------------------------------------------------|---|--------|-------|-------|--------|-------|-------|
| AS94_09885 | <i>pflB</i> | formate acetyltransferase                                        |   | -2.478 | 0.000 | 0.000 | -2.568 | 0.000 | 0.000 |
| AS94_09890 |             | pyruvate formate lyase-activating protein                        |   | -2.527 | 0.000 | 0.000 | -2.617 | 0.000 | 0.000 |
| AS94_09895 |             | hypothetical protein                                             |   | -1.630 | 0.000 | 0.000 | -1.059 | 0.004 | 0.010 |
| AS94_09900 |             | glycerophosphoryl diester<br>phosphodiesterase                   |   | -0.558 | 0.000 | 0.001 | -0.478 | 0.003 | 0.006 |
| AS94_09980 |             | nitric oxide dioxygenase                                         |   | -0.698 | 0.000 | 0.000 | -0.419 | 0.004 | 0.011 |
| AS94_09990 |             | PTS glucose transporter subunit IIB                              |   | -1.095 | 0.000 | 0.000 | -1.257 | 0.000 | 0.000 |
| AS94_10030 |             | iditol 2-dehydrogenase                                           |   | -1.095 | 0.000 | 0.000 | -0.994 | 0.000 | 0.000 |
| AS94_10075 |             | cell wall biosynthesis protein ScdA                              |   | -0.712 | 0.000 | 0.000 | -0.491 | 0.000 | 0.000 |
| AS94_10080 |             | sensor histidine kinase                                          |   | -0.941 | 0.000 | 0.000 | -0.717 | 0.000 | 0.000 |
| AS94_10085 |             | LytR family transcriptional regulator                            |   | -0.828 | 0.000 | 0.001 | -0.829 | 0.000 | 0.001 |
| AS94_10100 |             | GntR family transcriptional regulator                            |   | -0.750 | 0.000 | 0.000 | -0.977 | 0.000 | 0.000 |
| AS94_10105 |             | phosphoenolpyruvate-dependent sugar<br>PTS family porter_ EIIA 1 |   | -2.185 | 0.000 | 0.000 | -2.224 | 0.000 | 0.000 |
| AS94_10110 | <i>bglA</i> | aryl-phospho-beta-D-glucosidase                                  |   | -1.718 | 0.000 | 0.000 | -2.039 | 0.000 | 0.000 |
| AS94_10115 |             | hypothetical protein                                             |   | -1.156 | 0.000 | 0.000 | -1.335 | 0.000 | 0.000 |
| AS94_10140 |             | LacI family transcriptional regulator                            |   | -1.287 | 0.000 | 0.000 | -1.483 | 0.000 | 0.000 |
| AS94_10155 |             | penicillin V acylase                                             |   | -0.996 | 0.000 | 0.000 | -0.848 | 0.000 | 0.000 |
| AS94_10255 |             | hypothetical protein                                             |   | -0.598 | 0.000 | 0.001 | -0.400 | 0.019 | 0.040 |
| AS94_10320 |             | formate/nitrite transporter                                      |   | -0.783 | 0.000 | 0.000 | -0.602 | 0.000 | 0.000 |
| AS94_10355 |             | pseudouridine-5'-phosphate glycosidase                           |   | -0.803 | 0.000 | 0.000 | -0.616 | 0.002 | 0.005 |
| AS94_10365 |             | sialic acid transporter                                          |   | -1.527 | 0.000 | 0.000 | -0.743 | 0.000 | 0.000 |
| AS94_10370 | <i>nanA</i> | N-acetylneuraminate lyase                                        | Y | -1.747 | 0.000 | 0.000 | -0.910 | 0.000 | 0.000 |
| AS94_10375 |             | N-acetylmannosamine kinase                                       |   | -0.868 | 0.000 | 0.000 | -0.500 | 0.000 | 0.000 |
| AS94_10380 |             | RpiR family transcriptional regulator                            |   | -0.609 | 0.000 | 0.000 | -0.540 | 0.000 | 0.000 |
| AS94_10385 |             | N-acetylmannosamine-6-phosphate 2-<br>epimerase                  |   | -0.821 | 0.000 | 0.000 | -0.813 | 0.000 | 0.000 |
| AS94_10400 |             | alpha/beta hydrolase                                             |   | -0.831 | 0.000 | 0.000 | -0.946 | 0.000 | 0.000 |
| AS94_10475 |             | glyoxalase                                                       |   | -0.559 | 0.009 | 0.020 | -0.553 | 0.010 | 0.022 |
| AS94_10480 |             | luciferase                                                       |   | -1.058 | 0.000 | 0.000 | -1.150 | 0.000 | 0.000 |
| AS94_10485 |             | FMN reductase                                                    |   | -0.591 | 0.015 | 0.032 | -0.957 | 0.000 | 0.000 |



|            |             |                                         |        |       |       |        |       |       |
|------------|-------------|-----------------------------------------|--------|-------|-------|--------|-------|-------|
| AS94_10490 |             | membrane protein                        | -0.960 | 0.000 | 0.000 | -1.031 | 0.000 | 0.000 |
| AS94_10665 |             | hypothetical protein                    | -1.408 | 0.000 | 0.000 | -1.321 | 0.000 | 0.000 |
| AS94_10675 |             | phosphoglycerate mutase                 | -0.449 | 0.012 | 0.026 | -0.416 | 0.020 | 0.044 |
| AS94_10700 |             | alkyl hydroperoxide reductase subunit C | -0.477 | 0.000 | 0.000 | -0.366 | 0.001 | 0.002 |
| AS94_10705 | <i>nfrA</i> | NADPH-dependent oxidoreductase          | -0.566 | 0.000 | 0.001 | -0.712 | 0.000 | 0.000 |
| AS94_10730 | <i>xpt</i>  | xanthine phosphoribosyltransferase      | -1.458 | 0.000 | 0.000 | -1.523 | 0.000 | 0.000 |
| AS94_10735 |             | xanthine permease                       | -1.145 | 0.000 | 0.000 | -1.247 | 0.000 | 0.000 |
| AS94_10740 | <i>guaB</i> | inosine 5'-monophosphate dehydrogenase  | -1.063 | 0.000 | 0.000 | -1.206 | 0.000 | 0.000 |
| AS94_10745 | <i>guaA</i> | GMP synthase                            | -0.806 | 0.000 | 0.000 | -1.191 | 0.000 | 0.000 |
| AS94_10815 |             | membrane protein                        | -1.762 | 0.000 | 0.000 | -1.961 | 0.000 | 0.000 |
| AS94_10820 |             | 3-beta hydroxysteroid dehydrogenase     | -1.256 | 0.000 | 0.000 | -1.140 | 0.000 | 0.000 |
| AS94_10890 |             | hypothetical protein                    | -0.978 | 0.000 | 0.000 | -1.002 | 0.000 | 0.000 |
| AS94_10895 |             | hypothetical protein                    | -1.471 | 0.003 | 0.006 | -1.503 | 0.002 | 0.005 |
| AS94_10940 |             | NADH dehydrogenase subunit 5            | -0.803 | 0.000 | 0.000 | -0.926 | 0.000 | 0.000 |
| AS94_10945 |             | hypothetical protein                    | -0.713 | 0.000 | 0.000 | -0.629 | 0.000 | 0.000 |
| AS94_10965 |             | carboxylesterase                        | -0.830 | 0.000 | 0.000 | -0.800 | 0.000 | 0.000 |
| AS94_10970 |             | sodium-dependent transporter            | -0.471 | 0.008 | 0.017 | -0.903 | 0.000 | 0.000 |
| AS94_11000 |             | N-acetylmuramoyl-L-alanine amidase      | -0.384 | 0.001 | 0.002 | -0.457 | 0.000 | 0.000 |
| AS94_11020 |             | hypothetical protein                    | -0.830 | 0.000 | 0.000 | -1.007 | 0.000 | 0.000 |
| AS94_11025 |             | hypothetical protein                    | -0.701 | 0.000 | 0.000 | -0.535 | 0.002 | 0.004 |
| AS94_11075 | <i>dnaX</i> | DNA polymerase III subunit gamma/tau    | -0.323 | 0.006 | 0.014 | -0.370 | 0.002 | 0.004 |
| AS94_11080 |             | hypothetical protein                    | -0.618 | 0.002 | 0.005 | -0.499 | 0.013 | 0.029 |
| AS94_11090 |             | adhesin                                 | -1.569 | 0.000 | 0.000 | -1.330 | 0.000 | 0.000 |
| AS94_11095 |             | 2-oxoglutarate translocator             | -0.887 | 0.000 | 0.000 | -0.947 | 0.000 | 0.000 |
| AS94_11100 |             | chloramphenicol-sensitive protein RarD  | -0.445 | 0.009 | 0.020 | -0.508 | 0.003 | 0.007 |
| AS94_11110 |             | nickel transporter NixA                 | -0.701 | 0.000 | 0.000 | -0.893 | 0.000 | 0.000 |
| AS94_11115 |             | N-acetyltransferase                     | -0.617 | 0.000 | 0.000 | -0.821 | 0.000 | 0.000 |
| AS94_11145 |             | cold-shock protein                      | -0.635 | 0.000 | 0.000 | -0.592 | 0.000 | 0.000 |
| AS94_11150 |             | Cro/C1 family transcriptional regulator | -1.114 | 0.000 | 0.000 | -1.032 | 0.000 | 0.000 |

|            |              |                                                                                                           |        |       |       |        |       |       |
|------------|--------------|-----------------------------------------------------------------------------------------------------------|--------|-------|-------|--------|-------|-------|
| AS94_11155 |              | hypothetical protein                                                                                      | -1.053 | 0.000 | 0.000 | -0.629 | 0.002 | 0.006 |
| AS94_11160 |              | hypothetical protein                                                                                      | -1.163 | 0.000 | 0.000 | -0.695 | 0.001 | 0.003 |
| AS94_11225 |              | carbohydrate kinase                                                                                       | -1.327 | 0.000 | 0.000 | -1.238 | 0.000 | 0.000 |
| AS94_11265 | <i>rplI</i>  | 50S ribosomal protein L9                                                                                  | -0.585 | 0.000 | 0.000 | -0.666 | 0.000 | 0.000 |
| AS94_11270 | <i>dnaB</i>  | replicative DNA helicase                                                                                  | -0.915 | 0.000 | 0.000 | -1.089 | 0.000 | 0.000 |
| AS94_11400 |              | recombinase RecA                                                                                          | -0.609 | 0.002 | 0.005 | -0.828 | 0.000 | 0.000 |
| AS94_11465 | <i>ilvE</i>  | branched-chain amino acid<br>aminotransferase                                                             | -0.377 | 0.000 | 0.001 | -0.363 | 0.001 | 0.002 |
| AS94_11480 |              | molecular chaperone                                                                                       | -0.896 | 0.000 | 0.000 | -1.156 | 0.000 | 0.000 |
| AS94_11495 |              | elongation factor Tu                                                                                      | -0.311 | 0.006 | 0.015 | -0.374 | 0.001 | 0.003 |
| AS94_11520 | <i>rpoC</i>  | DNA-directed RNA polymerase subunit<br>beta'                                                              | -0.414 | 0.000 | 0.000 | -0.472 | 0.000 | 0.000 |
| AS94_11525 | <i>rpoB</i>  | DNA-directed RNA polymerase subunit<br>beta                                                               | -0.292 | 0.009 | 0.019 | -0.271 | 0.015 | 0.033 |
| AS94_11600 | <i>gltX</i>  | glutamyl-tRNA synthase                                                                                    | -0.584 | 0.000 | 0.000 | -0.585 | 0.000 | 0.000 |
| AS94_11660 |              | adhesin                                                                                                   | -2.593 | 0.000 | 0.000 | -2.529 | 0.000 | 0.000 |
| AS94_11670 |              | pyrrolidone-carboxylate peptidase                                                                         | -1.024 | 0.000 | 0.000 | -1.052 | 0.000 | 0.000 |
| AS94_11690 |              | polysaccharide deacetylase                                                                                | -1.341 | 0.000 | 0.000 | -1.007 | 0.002 | 0.006 |
| AS94_11695 |              | ATP phosphoribosyltransferase                                                                             | -2.684 | 0.000 | 0.000 | -2.797 | 0.000 | 0.000 |
| AS94_11700 | <i>hisG</i>  | ATP phosphoribosyltransferase                                                                             | -2.917 | 0.000 | 0.000 | -2.726 | 0.000 | 0.000 |
| AS94_11705 | <i>hisD</i>  | histidinol dehydrogenase                                                                                  | -2.248 | 0.000 | 0.000 | -2.226 | 0.000 | 0.000 |
| AS94_11710 |              | histidinol-phosphate aminotransferase                                                                     | -2.002 | 0.000 | 0.000 | -1.979 | 0.000 | 0.000 |
| AS94_11715 |              | imidazoleglycerol-phosphate dehydratase                                                                   | -1.603 | 0.009 | 0.020 | -1.428 | 0.020 | 0.044 |
| AS94_11720 | <i>hisH</i>  | imidazole glycerol phosphate synthase                                                                     | -1.820 | 0.001 | 0.002 | -1.895 | 0.001 | 0.002 |
| AS94_11725 | <i>hisA</i>  | 1-(5-phosphoribosyl)-5-[(5-<br>phosphoribosylamino)methylideneamino]<br>imidazole-4-carboxamide isomerase | -1.342 | 0.000 | 0.001 | -1.252 | 0.001 | 0.002 |
| AS94_11730 | <i>hisF</i>  | imidazole glycerol phosphate synthase                                                                     | -0.959 | 0.004 | 0.010 | -0.932 | 0.005 | 0.013 |
| AS94_11735 | <i>hisE</i>  | phosphoribosyl-AMP cyclohydrolase                                                                         | -0.876 | 0.000 | 0.000 | -0.752 | 0.001 | 0.003 |
| AS94_11760 |              | N-glycosyltransferase                                                                                     | -1.459 | 0.000 | 0.000 | -1.757 | 0.000 | 0.000 |
| AS94_11830 |              | adhesin                                                                                                   | -0.661 | 0.000 | 0.000 | -0.674 | 0.000 | 0.000 |
| AS94_11835 | <i>secY2</i> | preprotein translocase subunit SecY                                                                       | -1.029 | 0.000 | 0.001 | -1.093 | 0.000 | 0.000 |

|            |             |                                       |   |   |        |       |       |        |       |       |
|------------|-------------|---------------------------------------|---|---|--------|-------|-------|--------|-------|-------|
| AS94_11840 |             | Accessory Sec system protein Asp1     |   |   | -1.428 | 0.000 | 0.000 | -1.249 | 0.000 | 0.000 |
| AS94_11845 |             | accessory secretory protein Asp2      |   |   | -1.126 | 0.000 | 0.000 | -1.085 | 0.000 | 0.000 |
| AS94_11850 |             | Accessory Sec system protein Asp3     |   |   | -0.998 | 0.001 | 0.002 | -0.775 | 0.009 | 0.022 |
| AS94_11890 | <i>manA</i> | mannose-6-phosphate isomerase         |   |   | -2.854 | 0.000 | 0.000 | -3.259 | 0.000 | 0.000 |
| AS94_11895 | <i>manP</i> | PTS mannose transporter subunit IIABC | Y |   | -2.655 | 0.000 | 0.000 | -2.737 | 0.000 | 0.000 |
| AS94_11905 |             | hypothetical protein                  |   |   | -0.654 | 0.001 | 0.004 | -0.564 | 0.006 | 0.015 |
| AS94_11925 | <i>arcA</i> | arginine deiminase                    | Y |   | -1.650 | 0.000 | 0.000 | -1.290 | 0.000 | 0.000 |
| AS94_11930 | <i>argF</i> | ornithine carbamoyltransferase        | Y | Y | -0.787 | 0.000 | 0.000 | -0.449 | 0.001 | 0.004 |
| AS94_11960 |             | Fur family transcriptional regulator  |   |   | -0.743 | 0.000 | 0.000 | -0.644 | 0.000 | 0.000 |
| AS94_11980 |             | membrane protein                      |   |   | -0.302 | 0.021 | 0.042 | -0.296 | 0.023 | 0.049 |
| AS94_12005 |             | membrane protein                      |   |   | -0.503 | 0.002 | 0.004 | -0.661 | 0.000 | 0.000 |
| AS94_12470 |             | ferritin                              |   |   | -0.759 | 0.000 | 0.000 | -0.897 | 0.000 | 0.000 |
| AS94_12565 |             | membrane protein                      |   |   | -0.577 | 0.000 | 0.001 | -0.648 | 0.000 | 0.000 |
| AS94_12570 | <i>nadE</i> | NAD synthetase                        |   |   | -0.437 | 0.002 | 0.006 | -0.443 | 0.002 | 0.005 |
| AS94_12585 |             | prephenate dehydratase                |   |   | -0.689 | 0.000 | 0.000 | -0.617 | 0.000 | 0.000 |
| AS94_12605 |             | pyrophosphatase                       |   |   | -0.684 | 0.000 | 0.000 | -0.864 | 0.000 | 0.000 |
| AS94_12610 |             | aldehyde dehydrogenase                |   |   | -0.768 | 0.000 | 0.000 | -0.845 | 0.000 | 0.000 |
| AS94_12785 |             | hypothetical protein                  |   |   | -1.400 | 0.000 | 0.000 | -1.746 | 0.000 | 0.000 |
| AS94_12815 |             | peptidase M23                         |   |   | -0.821 | 0.000 | 0.001 | -0.945 | 0.000 | 0.000 |
| AS94_12865 |             | nitroreductase                        |   |   | -0.506 | 0.000 | 0.000 | -0.400 | 0.002 | 0.006 |
| AS94_12875 | <i>hld</i>  | delta-hemolysin                       | Y |   | -0.725 | 0.000 | 0.000 | -0.296 | 0.004 | 0.010 |
| AS94_12880 | <i>agrB</i> | accessory gene regulator B            | Y |   | -0.893 | 0.000 | 0.000 | -0.784 | 0.000 | 0.000 |
| AS94_12890 | <i>agrC</i> | histidine kinase                      | Y |   | -0.607 | 0.000 | 0.000 | -0.536 | 0.000 | 0.000 |
| AS94_12895 | <i>agrA</i> | histidine kinase                      | Y |   | -0.952 | 0.000 | 0.000 | -0.901 | 0.000 | 0.000 |
| AS94_12900 | <i>pfkB</i> | fructokinase                          |   |   | -0.915 | 0.000 | 0.000 | -1.091 | 0.000 | 0.000 |
| AS94_12905 |             | sucrose-6-phosphate hydrolase         |   |   | -0.487 | 0.000 | 0.000 | -0.423 | 0.000 | 0.000 |
| AS94_12945 |             | O-sialoglycoprotein endopeptidase     |   |   | -0.317 | 0.011 | 0.024 | -0.444 | 0.000 | 0.001 |
| AS94_13015 |             | hypothetical protein                  |   |   | -3.718 | 0.007 | 0.017 | -3.340 | 0.017 | 0.036 |
| AS94_13445 | <i>hemG</i> | protoporphyrinogen oxidase            |   |   | -0.334 | 0.021 | 0.043 | -0.459 | 0.001 | 0.004 |

|            |              |                                      |        |       |       |        |       |       |
|------------|--------------|--------------------------------------|--------|-------|-------|--------|-------|-------|
| AS94_13475 |              | cell-cycle regulation protein HIT    | -1.061 | 0.000 | 0.000 | -1.246 | 0.000 | 0.000 |
| AS94_12245 |              | hypothetical protein                 | -2.279 | 0.000 | 0.001 | -1.619 | 0.014 | 0.030 |
| AS94_12265 | $\phi$ SA169 | hypothetical protein                 | -0.776 | 0.016 | 0.033 | -1.225 | 0.000 | 0.000 |
| AS94_12285 |              | DNA replication protein DnaC         | -0.520 | 0.008 | 0.018 | -0.648 | 0.001 | 0.003 |
| AS94_13030 |              | hypothetical protein                 | -1.362 | 0.000 | 0.000 | -1.393 | 0.000 | 0.000 |
| AS94_13035 | <i>entG</i>  | enterotoxin                          | -0.920 | 0.000 | 0.000 | -0.712 | 0.001 | 0.003 |
| AS94_13070 |              | autolysin                            | -2.341 | 0.000 | 0.000 | -0.873 | 0.000 | 0.000 |
| AS94_13075 |              | holin                                | -3.249 | 0.000 | 0.000 | -1.556 | 0.000 | 0.000 |
| AS94_13095 |              | hypothetical protein                 | -2.348 | 0.000 | 0.000 | -0.651 | 0.002 | 0.006 |
| AS94_13100 |              | minor structural protein             | -2.067 | 0.000 | 0.000 | -0.542 | 0.001 | 0.003 |
| AS94_13110 |              | peptidase                            | -2.176 | 0.000 | 0.000 | -0.459 | 0.021 | 0.044 |
| AS94_13120 |              | tail protein                         | -2.112 | 0.000 | 0.000 | -0.489 | 0.000 | 0.000 |
| AS94_13135 | mutual       | tail protein                         | -2.071 | 0.000 | 0.000 | -0.647 | 0.000 | 0.001 |
| AS94_13195 | prophage     | transcriptional regulator            | -1.929 | 0.000 | 0.000 | -1.194 | 0.000 | 0.000 |
| AS94_13200 |              | helicase                             | -1.557 | 0.000 | 0.000 | -0.662 | 0.002 | 0.006 |
| AS94_13205 |              | hypothetical protein                 | -1.435 | 0.000 | 0.000 | -0.686 | 0.001 | 0.002 |
| AS94_13220 |              | hypothetical protein                 | -1.711 | 0.000 | 0.000 | -1.089 | 0.000 | 0.000 |
| AS94_13350 |              | hypothetical protein                 | -1.164 | 0.007 | 0.015 | -1.035 | 0.016 | 0.036 |
| AS94_13360 |              | hypothetical protein                 | -1.727 | 0.000 | 0.000 | -1.755 | 0.000 | 0.000 |
| AS94_13370 |              | hypothetical protein                 | -0.962 | 0.000 | 0.000 | -0.611 | 0.000 | 0.000 |
| AS94_13375 |              | XRE family transcriptional regulator | -1.445 | 0.000 | 0.000 | -0.882 | 0.000 | 0.001 |
| AS94_13390 |              | hypothetical protein                 | -0.899 | 0.000 | 0.000 | -0.551 | 0.000 | 0.000 |
