# Supplementary material for: Transcriptome Analyses of Prophage in Mediating Persistent Methicillin-Resistant Staphylococcus aureus Endovascular Infection
Source: MDPI journal article supplement (doi:10.3390/genes13091527), 2022-08-25
Supplement: s1 [file s1]

Table S2. Down-regulated DEGs in 301-188::φSA169 vs. 301-188

| locus      | group      | product                                             | log <sub>2</sub> (fold change) | p value | p adj |
|------------|------------|-----------------------------------------------------|--------------------------------|---------|-------|
| AS94_00025 | host genes | calcium-binding protein                             | -0.470                         | 0.000   | 0.010 |
| AS94_00060 |            | phosphoenolpyruvate carboxykinase                   | -0.471                         | 0.000   | 0.002 |
| AS94_00170 |            | proline dehydrogenase                               | -0.752                         | 0.000   | 0.000 |
| AS94_00315 |            | histone deacetylase                                 | -0.566                         | 0.000   | 0.009 |
| AS94_00325 |            | acetyl-CoA synthetase                               | -0.495                         | 0.000   | 0.007 |
| AS94_00560 |            | glyceraldehyde-3-phosphate dehydrogenase            | -0.469                         | 0.000   | 0.004 |
| AS94_00630 |            | glutamyl-tRNA reductase                             | -0.339                         | 0.001   | 0.014 |
| AS94_01855 |            | 2-oxoglutarate dehydrogenase E1                     | -0.348                         | 0.001   | 0.020 |
| AS94_03245 |            | leukocidin/Hemolysin toxin family protein           | -0.588                         | 0.000   | 0.000 |
| AS94_03460 |            | membrane protein                                    | -0.466                         | 0.000   | 0.010 |
| AS94_03465 |            | protoheme IX farnesyltransferase                    | -0.429                         | 0.000   | 0.007 |
| AS94_03470 |            | heme A synthase                                     | -0.406                         | 0.001   | 0.022 |
| AS94_03800 |            | cysteine protease                                   | -0.816                         | 0.001   | 0.014 |
| AS94_04145 |            | ATP-dependent Clp protease ATP-binding protein      | -0.452                         | 0.000   | 0.004 |
| AS94_04240 |            | ornithine-oxoacid aminotransferase                  | -0.328                         | 0.002   | 0.040 |
| AS94_04635 |            | enterotoxin                                         | -0.464                         | 0.000   | 0.001 |
| AS94_04675 |            | hydrolase                                           | -0.390                         | 0.001   | 0.027 |
| AS94_05575 |            | PTS lactose transporter subunit IIBC                | -0.742                         | 0.000   | 0.000 |
| AS94_05580 |            | PTS lactose transporter subunit IIA                 | -1.109                         | 0.002   | 0.029 |
| AS94_05585 |            | tagatose-bisphosphate aldolase                      | -0.807                         | 0.000   | 0.000 |
| AS94_05590 |            | tagatose-6-phosphate kinase                         | -0.855                         | 0.000   | 0.000 |
| AS94_05595 |            | galactose-6-phosphate isomerase                     | -1.089                         | 0.000   | 0.000 |
| AS94_05600 |            | galactose-6-phosphate isomerase                     | -0.759                         | 0.001   | 0.011 |
| AS94_06915 |            | nickel ABC transporter substrate-binding protein    | -0.541                         | 0.000   | 0.010 |
| AS94_07070 |            | gluconokinase                                       | -0.387                         | 0.001   | 0.011 |
| AS94_07310 |            | 1-pyrroline-5-carboxylate dehydrogenase             | -0.377                         | 0.001   | 0.011 |
| AS94_07320 |            | hypothetical protein                                | -0.692                         | 0.000   | 0.000 |
| AS94_07900 |            | manganese ABC transporter substrate-binding protein | -0.644                         | 0.000   | 0.000 |
| AS94_07905 |            | membrane protein                                    | -0.688                         | 0.000   | 0.000 |
| AS94_07910 |            | phosphonate ABC transporter ATP-binding protein     | -0.754                         | 0.000   | 0.000 |

|            |                 |                                           |        |       |       |
|------------|-----------------|-------------------------------------------|--------|-------|-------|
| AS94_08235 |                 | phosphofructokinase                       | -0.480 | 0.003 | 0.047 |
| AS94_08280 |                 | hypothetical protein                      | -0.481 | 0.001 | 0.012 |
| AS94_09210 |                 | general stress protein                    | -0.585 | 0.000 | 0.002 |
| AS94_09755 |                 | cellobiose operon outer surface protein   | -0.655 | 0.000 | 0.001 |
| AS94_09760 |                 | N-acetylmuramic acid-6-phosphate etherase | -0.627 | 0.000 | 0.001 |
| AS94_09765 |                 | permease                                  | -0.756 | 0.000 | 0.000 |
| AS94_09770 |                 | RpiR family transcriptional regulator     | -0.666 | 0.000 | 0.001 |
| AS94_09985 |                 | lactate dehydrogenase                     | -0.464 | 0.000 | 0.002 |
| AS94_10090 |                 | murein hydrolase regulator LrgA           | -0.855 | 0.000 | 0.001 |
| AS94_10365 |                 | sialic acid transporter                   | -0.784 | 0.000 | 0.000 |
| AS94_10370 |                 | N-acetylneuraminate lyase                 | -0.838 | 0.000 | 0.000 |
| AS94_10375 |                 | N-acetylmannosamine kinase                | -0.368 | 0.003 | 0.047 |
| AS94_10395 |                 | lipase                                    | -0.441 | 0.000 | 0.002 |
| AS94_11050 |                 | PTS ascorbate transporter subunit IIA     | -0.674 | 0.000 | 0.000 |
| AS94_11470 |                 | UDP-glucose 4-epimerase                   | -0.479 | 0.000 | 0.003 |
| AS94_11640 |                 | glutamine amidotransferase                | -0.411 | 0.001 | 0.015 |
| AS94_11645 |                 | pyridoxal biosynthesis protein            | -0.378 | 0.002 | 0.030 |
| AS94_11740 |                 | lipase                                    | -0.533 | 0.000 | 0.001 |
| AS94_12380 |                 | hypothetical protein                      | -0.900 | 0.000 | 0.000 |
| AS94_12580 |                 | nitric oxide synthase                     | -0.436 | 0.001 | 0.014 |
| AS94_12875 |                 | delta-hemolysin                           | -0.429 | 0.000 | 0.001 |
| AS94_13490 |                 | peptidyl-prolyl cis-trans isomerase       | -0.413 | 0.001 | 0.021 |
| AS94_13070 | mutual prophage | autolysin                                 | -1.467 | 0.000 | 0.000 |
| AS94_13075 |                 | holin                                     | -1.693 | 0.000 | 0.000 |
| AS94_13080 |                 | hypothetical protein                      | -1.675 | 0.000 | 0.000 |
| AS94_13090 |                 | hypothetical protein                      | -2.183 | 0.000 | 0.000 |
| AS94_13095 |                 | hypothetical protein                      | -1.697 | 0.000 | 0.000 |
| AS94_13100 |                 | minor structural protein                  | -1.525 | 0.000 | 0.000 |
| AS94_13110 |                 | peptidase                                 | -1.716 | 0.000 | 0.000 |
| AS94_13115 |                 | holin                                     | -1.895 | 0.000 | 0.000 |
| AS94_13120 |                 | tail protein                              | -1.623 | 0.000 | 0.000 |
| AS94_13130 |                 | hypothetical protein                      | -2.751 | 0.000 | 0.000 |
| AS94_13135 |                 | tail protein                              | -1.424 | 0.000 | 0.000 |
| AS94_13140 |                 | tail protein                              | -2.010 | 0.000 | 0.000 |

|            |                                 |        |       |       |
|------------|---------------------------------|--------|-------|-------|
| AS94_13150 | hypothetical protein            | -1.850 | 0.000 | 0.000 |
| AS94_13160 | hypothetical protein            | -2.001 | 0.000 | 0.000 |
| AS94_13165 | phage capsid protein            | -1.930 | 0.000 | 0.000 |
| AS94_13170 | ATP-dependent Clp protease ClpP | -2.186 | 0.000 | 0.000 |
| AS94_13175 | portal protein                  | -1.607 | 0.000 | 0.000 |
| AS94_13180 | terminase                       | -1.715 | 0.000 | 0.000 |
| AS94_13185 | terminase                       | -1.743 | 0.000 | 0.000 |
| AS94_13190 | HNH endonuclease                | -2.024 | 0.000 | 0.001 |
| AS94_13195 | transcriptional regulator       | -0.735 | 0.000 | 0.000 |
| AS94_13200 | helicase                        | -0.895 | 0.000 | 0.000 |
| AS94_13205 | hypothetical protein            | -0.750 | 0.000 | 0.002 |
| AS94_13355 | antirepressor                   | -0.457 | 0.001 | 0.017 |
