# Supplementary material for: Transcriptome Analyses of Prophage in Mediating Persistent Methicillin-Resistant Staphylococcus aureus Endovascular Infection
Source: MDPI journal article supplement (doi:10.3390/genes13091527), 2022-08-25
Supplement: s1 [file s1]

Table S4. Down-regulated DEGs in 300-169 vs. 301-188

| locus      | gene | group      | product                                | log <sub>2</sub> (fold change) | p value | p adj |
|------------|------|------------|----------------------------------------|--------------------------------|---------|-------|
| AS94_00045 |      |            | membrane protein                       | -0.688                         | 0.001   | 0.002 |
| AS94_00055 |      |            | dipeptidyl aminopeptidase              | -0.628                         | 0.000   | 0.000 |
| AS94_00195 |      |            | multidrug MFS transporter              | -0.319                         | 0.021   | 0.044 |
| AS94_00205 |      |            | hypothetical protein                   | -0.923                         | 0.000   | 0.000 |
| AS94_00210 |      |            | peptidase                              | -0.416                         | 0.005   | 0.012 |
| AS94_00245 |      |            | phosphotransferase                     | -0.858                         | 0.000   | 0.000 |
| AS94_00250 |      |            | tRNA (guanine-N(7)-)-methyltransferase | -0.494                         | 0.000   | 0.000 |
| AS94_00255 |      |            | hypothetical protein                   | -0.984                         | 0.000   | 0.000 |
| AS94_00265 |      |            | glutamyl aminopeptidase                | -0.359                         | 0.006   | 0.014 |
| AS94_00270 |      |            | thioredoxin                            | -0.376                         | 0.007   | 0.017 |
| AS94_00305 |      |            | 3-deoxy-7-phosphoheptulonate synthase  | -1.464                         | 0.000   | 0.000 |
| AS94_00370 |      |            | 3-phosphoglycerate dehydrogenase       | -0.473                         | 0.001   | 0.002 |
| AS94_00395 |      |            | hypothetical protein                   | -0.414                         | 0.017   | 0.035 |
| AS94_00435 |      |            | universal stress protein UspA          | -2.146                         | 0.000   | 0.000 |
| AS94_00445 |      |            | dipeptidase                            | -0.631                         | 0.000   | 0.000 |
| AS94_00450 |      | host genes | beta-lactamase                         | -1.246                         | 0.000   | 0.000 |
| AS94_00460 |      |            | universal stress protein UspA          | -1.098                         | 0.000   | 0.000 |
| AS94_00505 |      |            | 6-phosphofructokinase                  | -0.997                         | 0.000   | 0.000 |
| AS94_00510 |      |            | pyruvate kinase                        | -0.667                         | 0.000   | 0.000 |
| AS94_00525 |      |            | isocitrate dehydrogenase               | -0.612                         | 0.000   | 0.000 |
| AS94_00545 |      |            | DNA polymerase I                       | -0.519                         | 0.000   | 0.000 |
| AS94_00550 |      |            | formamidopyrimidine-DNA glycosylase    | -0.486                         | 0.000   | 0.000 |
| AS94_00555 |      |            | dephospho-CoA kinase                   | -1.148                         | 0.000   | 0.000 |
| AS94_00565 |      |            | NrdR family transcriptional regulator  | -0.339                         | 0.021   | 0.042 |
| AS94_00570 |      |            | chromosome replication protein DnaB    | -0.268                         | 0.019   | 0.040 |
| AS94_00575 |      |            | primosomal protein DnaI                | -0.406                         | 0.000   | 0.001 |
| AS94_00580 |      |            | threonyl-tRNA synthase                 | -1.711                         | 0.000   | 0.000 |
| AS94_00585 |      |            | gamma-aminobutyrate permease           | -1.052                         | 0.000   | 0.000 |
| AS94_00645 |      |            | uroporphyrinogen III synthase          | -0.444                         | 0.005   | 0.011 |
| AS94_00650 |      |            | delta-aminolevulinic acid dehydratase  | -0.273                         | 0.022   | 0.044 |

|            |                                              |        |       |       |
|------------|----------------------------------------------|--------|-------|-------|
| AS94_00655 | glutamate-1-semialdehyde<br>aminotransferase | -0.376 | 0.001 | 0.002 |
| AS94_00665 | DNA-3-methyladenine glycosylase              | -1.452 | 0.000 | 0.000 |
| AS94_00730 | 50S ribosomal protein L27                    | -1.294 | 0.000 | 0.000 |
| AS94_00735 | GTPase CgtA                                  | -0.331 | 0.006 | 0.014 |
| AS94_00785 | GTP pyrophosphokinase                        | -0.367 | 0.000 | 0.001 |
| AS94_00795 | cell wall amidase                            | -0.459 | 0.000 | 0.001 |
| AS94_00800 | hypothetical protein                         | -0.369 | 0.014 | 0.029 |
| AS94_00810 | aspartyl-tRNA synthase                       | -0.666 | 0.000 | 0.000 |
| AS94_00840 | hypothetical protein                         | -0.698 | 0.000 | 0.000 |
| AS94_00855 | hypothetical protein                         | -0.479 | 0.014 | 0.031 |
| AS94_00860 | hypothetical protein                         | -0.429 | 0.000 | 0.001 |
| AS94_00870 | hypothetical protein                         | -0.524 | 0.001 | 0.002 |
| AS94_00875 | Holliday junction resolvase                  | -0.517 | 0.000 | 0.000 |
| AS94_00880 | hypothetical protein                         | -0.394 | 0.003 | 0.006 |
| AS94_00905 | transcription elongation factor GreA         | -0.418 | 0.001 | 0.003 |
| AS94_01005 | deoxycytidylate deaminase                    | -0.636 | 0.000 | 0.001 |
| AS94_01185 | superoxide dismutase                         | -0.792 | 0.000 | 0.000 |
| AS94_01260 | shikimate kinase                             | -0.601 | 0.000 | 0.001 |
| AS94_01265 | glycine cleavage system protein T            | -0.624 | 0.000 | 0.000 |
| AS94_01270 | glycine dehydrogenase subunit 1              | -0.769 | 0.000 | 0.000 |
| AS94_01275 | glycine dehydrogenase subunit 2              | -1.048 | 0.000 | 0.000 |
| AS94_01280 | rhodanese                                    | -0.291 | 0.018 | 0.038 |
| AS94_01370 | 2-oxoglutarate dehydrogenase E2              | -0.549 | 0.000 | 0.000 |
| AS94_01405 | transcriptional regulator                    | -1.046 | 0.000 | 0.000 |
| AS94_01410 | trehalose-6-phosphate hydrolase              | -1.817 | 0.000 | 0.000 |
| AS94_01430 | pyrroline-5-carboxylate reductase            | -0.782 | 0.000 | 0.000 |
| AS94_01455 | Fur family transcriptional regulator         | -0.319 | 0.013 | 0.028 |
| AS94_01460 | tyrosine recombinase XerD                    | -0.925 | 0.000 | 0.000 |
| AS94_01490 | sensor histidine kinase                      | -0.390 | 0.000 | 0.001 |
| AS94_01560 | glycerol-3-phosphate dehydrogenase           | -0.516 | 0.000 | 0.000 |
| AS94_01565 | DNA-binding protein                          | -0.800 | 0.000 | 0.000 |

|            |                                                    |        |       |       |
|------------|----------------------------------------------------|--------|-------|-------|
| AS94_01605 | 3-phosphoshikimate 1-carboxyvinyltransferase       | -0.312 | 0.022 | 0.046 |
| AS94_01630 | hypothetical protein                               | -0.556 | 0.006 | 0.013 |
| AS94_01665 | endonuclease III                                   | -0.449 | 0.013 | 0.028 |
| AS94_01700 | hypothetical protein                               | -0.394 | 0.000 | 0.001 |
| AS94_01730 | alanine dehydrogenase                              | -0.505 | 0.001 | 0.003 |
| AS94_01735 | threonine dehydratase                              | -0.607 | 0.000 | 0.000 |
| AS94_01740 | amino acid permease                                | -0.388 | 0.009 | 0.020 |
| AS94_01745 | quinolone resistance protein NorB                  | -0.667 | 0.000 | 0.000 |
| AS94_01750 | matrix-binding protein                             | -0.438 | 0.000 | 0.000 |
| AS94_01775 | virulence factor                                   | -0.295 | 0.009 | 0.021 |
| AS94_01780 | hypothetical protein                               | -0.493 | 0.000 | 0.001 |
| AS94_01795 | hypothetical protein                               | -0.462 | 0.000 | 0.000 |
| AS94_01800 | methionine sulfoxide reductase A                   | -0.421 | 0.000 | 0.000 |
| AS94_01805 | methionine sulfoxide reductase B                   | -0.355 | 0.005 | 0.012 |
| AS94_01810 | PTS glucose transporter subunit IIA                | -0.295 | 0.012 | 0.025 |
| AS94_01920 | hypothetical protein                               | -1.003 | 0.000 | 0.000 |
| AS94_01925 | cold-shock protein                                 | -0.320 | 0.017 | 0.036 |
| AS94_01935 | protease                                           | -0.737 | 0.000 | 0.000 |
| AS94_02100 | aminopeptidase                                     | -0.884 | 0.000 | 0.000 |
| AS94_02105 | prephenate dehydrogenase                           | -0.747 | 0.000 | 0.000 |
| AS94_02110 | DNA repair protein MucB                            | -1.701 | 0.000 | 0.000 |
| AS94_02115 | 4-oxalocrotonate tautomerase                       | -1.777 | 0.000 | 0.000 |
| AS94_02125 | methionine sulfoxide reductase A                   | -0.532 | 0.000 | 0.001 |
| AS94_02145 | transcriptional regulator                          | -0.589 | 0.005 | 0.012 |
| AS94_02165 | glycerol-3-phosphate acyltransferase               | -0.456 | 0.000 | 0.001 |
| AS94_02230 | XRE family transcriptional regulator               | -1.344 | 0.000 | 0.000 |
| AS94_02255 | 50S ribosomal protein L33                          | -0.526 | 0.002 | 0.004 |
| AS94_02260 | catalase                                           | -0.479 | 0.000 | 0.000 |
| AS94_02270 | hypothetical protein                               | -0.544 | 0.000 | 0.001 |
| AS94_02520 | glutathione peroxidase                             | -0.375 | 0.012 | 0.026 |
| AS94_02530 | tRNA delta(2)-isopentenylpyrophosphate transferase | -0.440 | 0.013 | 0.028 |

|            |                                                           |        |       |       |
|------------|-----------------------------------------------------------|--------|-------|-------|
| AS94_02535 | lysophospholipase                                         | -0.980 | 0.000 | 0.000 |
| AS94_02540 | glycerol-3-phosphate dehydrogenase                        | -0.736 | 0.000 | 0.000 |
| AS94_02590 | 2-oxoacid ferredoxin oxidoreductase<br>subunit beta       | -0.782 | 0.000 | 0.000 |
| AS94_02595 | 2-oxoglutarate ferredoxin oxidoreductase<br>subunit alpha | -0.948 | 0.000 | 0.000 |
| AS94_02615 | protein RecA                                              | -0.281 | 0.006 | 0.013 |
| AS94_02660 | cell division protein FtsK                                | -0.277 | 0.014 | 0.030 |
| AS94_02665 | ribonuclease J                                            | -0.452 | 0.000 | 0.000 |
| AS94_02690 | ribosome-binding factor A                                 | -0.467 | 0.001 | 0.002 |
| AS94_02720 | DNA polymerase III subunit alpha                          | -0.333 | 0.002 | 0.004 |
| AS94_02865 | signal recognition particle protein Srp54                 | -0.764 | 0.000 | 0.000 |
| AS94_02930 | 50S ribosomal protein L28                                 | -1.592 | 0.000 | 0.000 |
| AS94_02990 | primosome assembly protein PriA                           | -0.682 | 0.000 | 0.000 |
| AS94_02995 | phosphopantothenoylcysteine<br>decarboxylase              | -0.718 | 0.000 | 0.000 |
| AS94_03000 | DNA-directed RNA polymerase subunit<br>omega              | -0.981 | 0.000 | 0.001 |
| AS94_03005 | guanylate kinase                                          | -0.391 | 0.002 | 0.005 |
| AS94_03075 | glyoxalase                                                | -1.094 | 0.000 | 0.000 |
| AS94_03080 | isoleucyl-tRNA synthetase                                 | -0.878 | 0.000 | 0.000 |
| AS94_03170 | 5'-nucleotidase                                           | -0.503 | 0.000 | 0.000 |
| AS94_03205 | hypothetical protein                                      | -0.894 | 0.000 | 0.000 |
| AS94_03210 | carbamate kinase                                          | -2.248 | 0.000 | 0.000 |
| AS94_03215 | ornithine carbamoyltransferase                            | -0.905 | 0.000 | 0.000 |
| AS94_03290 | phosphoesterase                                           | -1.105 | 0.000 | 0.000 |
| AS94_03295 | deoxyribonucleotide triphosphate<br>pyrophosphatase       | -1.087 | 0.000 | 0.000 |
| AS94_03300 | glutamate racemase                                        | -1.035 | 0.000 | 0.000 |
| AS94_03325 | thioredoxin                                               | -0.716 | 0.000 | 0.000 |
| AS94_03355 | phenylalanyl-tRNA synthase subunit beta                   | -0.647 | 0.000 | 0.000 |
| AS94_03380 | heme ABC transporter permease                             | -1.126 | 0.009 | 0.021 |
| AS94_03425 | phosphopantetheine adenylyltransferase                    | -0.633 | 0.000 | 0.001 |

|            |                                                                         |        |       |       |
|------------|-------------------------------------------------------------------------|--------|-------|-------|
| AS94_03485 | hypothetical protein                                                    | -0.477 | 0.020 | 0.041 |
| AS94_03505 | inositol monophosphatase                                                | -0.694 | 0.000 | 0.000 |
| AS94_03510 | hypothetical protein                                                    | -0.787 | 0.000 | 0.000 |
| AS94_03515 | manganese transporter                                                   | -0.467 | 0.000 | 0.000 |
| AS94_03590 | hypothetical protein                                                    | -0.498 | 0.001 | 0.002 |
| AS94_03635 | SAM-dependent methyltransferase                                         | -1.007 | 0.000 | 0.000 |
| AS94_03650 | thiamine ABC transporter permease                                       | -0.662 | 0.002 | 0.006 |
| AS94_03655 | ABC transporter ATP-binding protein                                     | -0.672 | 0.000 | 0.000 |
| AS94_03660 | cobalt ABC transporter permease                                         | -1.017 | 0.000 | 0.000 |
| AS94_03735 | quinol oxidase subunit 2                                                | -0.806 | 0.000 | 0.000 |
| AS94_03740 | quinol oxidase subunit 1                                                | -1.580 | 0.000 | 0.000 |
| AS94_03745 | cytochrome O ubiquinol oxidase                                          | -1.927 | 0.000 | 0.000 |
| AS94_03750 | quinol oxidase subunit 4                                                | -2.152 | 0.000 | 0.000 |
| AS94_03760 | hypothetical protein                                                    | -0.324 | 0.012 | 0.027 |
| AS94_03775 | mannosyl-glycoprotein endo-beta-N-acetylglucosamidase                   | -0.453 | 0.000 | 0.000 |
| AS94_03780 | MarR family transcriptional regulator                                   | -0.911 | 0.000 | 0.001 |
| AS94_03795 | glutamyl endopeptidase                                                  | -2.628 | 0.000 | 0.000 |
| AS94_03800 | cysteine protease                                                       | -2.378 | 0.000 | 0.000 |
| AS94_03805 | cysteine protease                                                       | -1.422 | 0.008 | 0.017 |
| AS94_03810 | dihydroxynaphthoic acid synthetase                                      | -1.448 | 0.000 | 0.000 |
| AS94_03815 | 2-succinyl-6-hydroxy-2_4-cyclohexadiene-1-carboxylate synthase          | -1.214 | 0.000 | 0.000 |
| AS94_03820 | 2-succinyl-5-enolpyruvyl-6-hydroxy-3-cyclohexene-1-carboxylate synthase | -0.629 | 0.000 | 0.000 |
| AS94_03835 | acetyltransferase                                                       | -0.811 | 0.000 | 0.000 |
| AS94_03870 | bacteriocin ABC transporter ATP-binding protein                         | -0.675 | 0.017 | 0.035 |
| AS94_03880 | bacteriocin-associated integral membrane protein                        | -0.751 | 0.000 | 0.001 |
| AS94_03900 | IDEAL domain protein                                                    | -0.938 | 0.000 | 0.000 |
| AS94_03940 | peptide chain release factor 1                                          | -0.321 | 0.003 | 0.008 |
| AS94_03995 | magnesium transporter MgtE                                              | -0.344 | 0.014 | 0.029 |

|            |                                                  |        |       |       |
|------------|--------------------------------------------------|--------|-------|-------|
| AS94_04000 | ribosomal large subunit pseudouridine synthase D | -0.439 | 0.007 | 0.017 |
| AS94_04005 | inorganic polyphosphate/ATP-NAD kinase           | -0.574 | 0.000 | 0.000 |
| AS94_04010 | GTP pyrophosphokinase                            | -0.890 | 0.000 | 0.000 |
| AS94_04020 | adenylate cyclase                                | -0.414 | 0.017 | 0.036 |
| AS94_04025 | Hemoglobin-like protein HbO                      | -0.403 | 0.016 | 0.033 |
| AS94_04045 | competence negative regulator MecA               | -0.638 | 0.000 | 0.000 |
| AS94_04130 | MAP domain protein                               | -0.945 | 0.000 | 0.000 |
| AS94_04175 | hypothetical protein                             | -0.811 | 0.000 | 0.000 |
| AS94_04180 | ATP-dependent DNA helicase subunit A             | -0.772 | 0.000 | 0.000 |
| AS94_04185 | ATP-dependent DNA helicase subunit B             | -0.815 | 0.000 | 0.000 |
| AS94_04215 | glucose-6-phosphate isomerase                    | -0.374 | 0.002 | 0.006 |
| AS94_04230 | glycerophosphoryl diester phosphodiesterase      | -0.606 | 0.000 | 0.001 |
| AS94_04245 | NADH-dependent flavin oxidoreductase             | -0.844 | 0.000 | 0.000 |
| AS94_04285 | cation:proton antiporter                         | -0.574 | 0.015 | 0.032 |
| AS94_04290 | cation:proton antiporter                         | -2.171 | 0.000 | 0.000 |
| AS94_04295 | cation:proton antiporter                         | -0.808 | 0.002 | 0.005 |
| AS94_04300 | hypothetical protein                             | -1.823 | 0.000 | 0.000 |
| AS94_04305 | thioesterase                                     | -0.775 | 0.000 | 0.000 |
| AS94_04310 | sodium:proton antiporter                         | -0.610 | 0.001 | 0.001 |
| AS94_04325 | hypothetical protein                             | -0.429 | 0.004 | 0.010 |
| AS94_04345 | nitrogen-fixing protein NifU                     | -0.560 | 0.001 | 0.002 |
| AS94_04375 | 2-ketogluconate reductase                        | -0.394 | 0.009 | 0.021 |
| AS94_04380 | HAD family hydrolase                             | -0.332 | 0.018 | 0.037 |
| AS94_04505 | arsenate reductase                               | -0.914 | 0.000 | 0.000 |
| AS94_04510 | thioredoxin                                      | -0.347 | 0.008 | 0.018 |
| AS94_04560 | membrane protein                                 | -2.763 | 0.000 | 0.000 |
| AS94_04580 | cold-shock protein                               | -0.742 | 0.000 | 0.000 |
| AS94_04585 | thermonuclease                                   | -1.632 | 0.000 | 0.000 |
| AS94_04630 | enterotoxin I                                    | -1.137 | 0.000 | 0.000 |
| AS94_04645 | hypothetical protein                             | -0.575 | 0.000 | 0.000 |
| AS94_04660 | transposase                                      | -0.990 | 0.000 | 0.000 |

|            |                                                            |        |       |       |
|------------|------------------------------------------------------------|--------|-------|-------|
| AS94_04665 | transposase                                                | -0.790 | 0.001 | 0.002 |
| AS94_04675 | hydrolase                                                  | -0.504 | 0.000 | 0.000 |
| AS94_04700 | deacetylase                                                | -0.329 | 0.012 | 0.026 |
| AS94_04710 | glucosamine-6-phosphate deaminase                          | -0.712 | 0.000 | 0.000 |
| AS94_04720 | 6-phospho 3-hexuloisomerase                                | -0.333 | 0.008 | 0.017 |
| AS94_04760 | pyridoxal kinase                                           | -0.486 | 0.000 | 0.000 |
| AS94_04890 | acetaldehyde reductase                                     | -0.374 | 0.016 | 0.034 |
| AS94_04970 | cysteine synthase                                          | -0.320 | 0.005 | 0.011 |
| AS94_04975 | heat shock protein Hsp33                                   | -0.609 | 0.000 | 0.000 |
| AS94_04995 | hypothetical protein                                       | -0.584 | 0.000 | 0.000 |
| AS94_05010 | nucleotide pyrophosphohydrolase                            | -0.656 | 0.000 | 0.000 |
| AS94_05035 | ribose-phosphate pyrophosphokinase                         | -0.407 | 0.000 | 0.000 |
| AS94_05040 | N-acetylglucosamine-1-phosphate<br>uridyltransferase       | -0.255 | 0.019 | 0.040 |
| AS94_05085 | methionyl-tRNA synthetase                                  | -0.427 | 0.000 | 0.000 |
| AS94_05105 | DNA replication protein YabA                               | -0.878 | 0.000 | 0.000 |
| AS94_05110 | signal peptidase II                                        | -0.474 | 0.000 | 0.001 |
| AS94_05120 | hypothetical protein                                       | -0.758 | 0.000 | 0.000 |
| AS94_05125 | thymidylate kinase                                         | -0.806 | 0.000 | 0.000 |
| AS94_05130 | lysine decarboxylase                                       | -0.873 | 0.000 | 0.000 |
| AS94_05145 | aspartate aminotransferase                                 | -0.921 | 0.009 | 0.020 |
| AS94_05155 | hypothetical protein                                       | -0.494 | 0.001 | 0.002 |
| AS94_05280 | hypothetical protein                                       | -1.235 | 0.020 | 0.041 |
| AS94_05290 | integrase                                                  | -0.360 | 0.019 | 0.039 |
| AS94_05410 | transposase                                                | -2.153 | 0.000 | 0.000 |
| AS94_05425 | hypothetical protein                                       | -0.668 | 0.002 | 0.006 |
| AS94_05440 | NA                                                         | -0.518 | 0.015 | 0.032 |
| AS94_05445 | chromosome partitioning protein ParA                       | -0.481 | 0.000 | 0.000 |
| AS94_05500 | iron citrate ABC transporter substrate-<br>binding protein | -1.581 | 0.000 | 0.000 |
| AS94_05555 | alcohol dehydrogenase                                      | -0.797 | 0.000 | 0.000 |
| AS94_05560 | alcohol dehydrogenase                                      | -0.755 | 0.000 | 0.000 |
| AS94_05570 | 6-phospho-beta-galactosidase                               | -2.586 | 0.000 | 0.000 |

|            |                                                              |        |       |       |
|------------|--------------------------------------------------------------|--------|-------|-------|
| AS94_05575 | PTS lactose transporter subunit IIBC                         | -2.334 | 0.000 | 0.000 |
| AS94_05580 | PTS lactose transporter subunit IIA                          | -3.043 | 0.000 | 0.000 |
| AS94_05585 | tagatose-bisphosphate aldolase                               | -2.569 | 0.000 | 0.000 |
| AS94_05590 | tagatose-6-phosphate kinase                                  | -2.374 | 0.000 | 0.000 |
| AS94_05595 | galactose-6-phosphate isomerase                              | -2.300 | 0.000 | 0.000 |
| AS94_05600 | galactose-6-phosphate isomerase                              | -2.599 | 0.000 | 0.000 |
| AS94_05605 | DeoR family transcriptional regulator                        | -0.556 | 0.002 | 0.004 |
| AS94_05610 | NAD-dependent deacetylase                                    | -0.456 | 0.022 | 0.044 |
| AS94_05615 | 2_5-diketo-D-gluconic acid reductase                         | -0.809 | 0.000 | 0.000 |
| AS94_05655 | alpha-acetolactate decarboxylase                             | -2.037 | 0.000 | 0.000 |
| AS94_05660 | acetolactate synthase                                        | -2.320 | 0.000 | 0.000 |
| AS94_05690 | tRNA pseudouridine synthase A                                | -0.335 | 0.015 | 0.032 |
| AS94_05705 | cobalt ABC transporter ATP-binding<br>protein                | -0.473 | 0.005 | 0.013 |
| AS94_05735 | translation initiation factor IF-1                           | -0.351 | 0.006 | 0.013 |
| AS94_05870 | GNAT family acetyltransferase                                | -0.873 | 0.000 | 0.000 |
| AS94_05880 | malonate transporter                                         | -0.768 | 0.000 | 0.000 |
| AS94_05890 | membrane protein                                             | -0.495 | 0.001 | 0.003 |
| AS94_05920 | MarR family transcriptional regulator                        | -0.444 | 0.013 | 0.028 |
| AS94_05930 | molybdenum cofactor biosynthesis protein<br>A                | -0.594 | 0.000 | 0.000 |
| AS94_05935 | molybdopterin-guanine dinucleotide<br>biosynthesis protein A | -0.681 | 0.000 | 0.000 |
| AS94_05945 | molybdopterin synthase subunit 2                             | -1.051 | 0.000 | 0.000 |
| AS94_05950 | molybdopterin-guanine dinucleotide<br>biosynthesis protein B | -0.667 | 0.001 | 0.003 |
| AS94_05955 | molybdopterin molybdenumtransferase                          | -1.838 | 0.000 | 0.000 |
| AS94_05960 | molybdenum cofactor biosynthesis protein<br>C                | -1.334 | 0.000 | 0.000 |
| AS94_05965 | molybdenum cofactor biosynthesis protein<br>B                | -1.780 | 0.000 | 0.000 |
| AS94_05970 | molybdopterin biosynthesis protein MoeB                      | -1.371 | 0.000 | 0.000 |



|            |                                                       |        |       |       |
|------------|-------------------------------------------------------|--------|-------|-------|
| AS94_05975 | molybdenum ABC transporter ATP-binding protein        | -1.366 | 0.000 | 0.000 |
| AS94_05980 | molybdenum ABC transporter permease                   | -1.152 | 0.000 | 0.000 |
| AS94_05985 | molybdenum ABC transporter substrate-binding protein  | -0.692 | 0.000 | 0.000 |
| AS94_05990 | formate dehydrogenase subunit D                       | -0.503 | 0.001 | 0.003 |
| AS94_06005 | purine nucleosidase                                   | -0.457 | 0.025 | 0.050 |
| AS94_06010 | ferrichrome ABC transporter substrate-binding protein | -0.679 | 0.000 | 0.000 |
| AS94_06015 | acyl-CoA dehydrogenase                                | -0.545 | 0.001 | 0.001 |
| AS94_06020 | urea transporter                                      | -1.505 | 0.000 | 0.000 |
| AS94_06025 | urease subunit gamma                                  | -1.562 | 0.005 | 0.011 |
| AS94_06030 | urease subunit beta                                   | -1.691 | 0.000 | 0.001 |
| AS94_06035 | urease subunit alpha                                  | -1.091 | 0.000 | 0.000 |
| AS94_06040 | urease accessory protein UreE                         | -1.128 | 0.000 | 0.000 |
| AS94_06045 | urease accessory protein UreF                         | -1.047 | 0.000 | 0.000 |
| AS94_06050 | urease accessory protein UreG                         | -1.179 | 0.000 | 0.000 |
| AS94_06055 | urease accessory protein UreD                         | -1.412 | 0.000 | 0.000 |
| AS94_06060 | MarR family transcriptional regulator                 | -0.661 | 0.000 | 0.000 |
| AS94_06065 | hypothetical protein                                  | -0.937 | 0.000 | 0.000 |
| AS94_06070 | transcriptional regulator                             | -0.659 | 0.018 | 0.038 |
| AS94_06100 | hypothetical protein                                  | -0.665 | 0.000 | 0.000 |
| AS94_06110 | 2-hydroxyacid dehydrogenase                           | -1.462 | 0.000 | 0.000 |
| AS94_06115 | hypothetical protein                                  | -0.734 | 0.000 | 0.000 |
| AS94_06130 | hypothetical protein                                  | -0.935 | 0.000 | 0.000 |
| AS94_06135 | oxidoreductase                                        | -0.524 | 0.000 | 0.000 |
| AS94_06155 | DeoR family transcriptional regulator                 | -0.879 | 0.000 | 0.000 |
| AS94_06195 | HAD family hydrolase                                  | -0.592 | 0.005 | 0.012 |
| AS94_06200 | sodium transporter                                    | -0.658 | 0.008 | 0.019 |
| AS94_06210 | PTS alpha-glucoside transporter subunit IIBC          | -2.524 | 0.000 | 0.000 |
| AS94_06225 | sodium:proton antiporter                              | -0.460 | 0.003 | 0.008 |
| AS94_06235 | oxidoreductase                                        | -0.298 | 0.012 | 0.026 |

|            |                                                   |        |       |       |
|------------|---------------------------------------------------|--------|-------|-------|
| AS94_06265 | lysostaphin resistance protein A                  | -0.451 | 0.001 | 0.002 |
| AS94_06270 | ribose 5-phosphate isomerase                      | -0.857 | 0.000 | 0.000 |
| AS94_06275 | molybdenum cofactor biosynthesis<br>protein       | -0.550 | 0.002 | 0.006 |
| AS94_06280 | aldose 1-epimerase                                | -0.555 | 0.000 | 0.001 |
| AS94_06285 | membrane protein                                  | -0.764 | 0.001 | 0.001 |
| AS94_06305 | 3-methyladenine DNA glycosylase                   | -1.074 | 0.000 | 0.000 |
| AS94_06315 | isopentenyl pyrophosphate isomerase               | -0.523 | 0.000 | 0.000 |
| AS94_06380 | hemin ABC transporter ATP-binding<br>protein      | -2.343 | 0.000 | 0.000 |
| AS94_06385 | hemin ABC transporter permease                    | -2.331 | 0.000 | 0.000 |
| AS94_06390 | heme transporter CcmC                             | -0.866 | 0.001 | 0.003 |
| AS94_06395 | sensor histidine kinase                           | -1.154 | 0.000 | 0.000 |
| AS94_06420 | antibiotic ABC transporter permease               | -0.928 | 0.003 | 0.007 |
| AS94_06445 | acetyltransferase                                 | -0.846 | 0.001 | 0.002 |
| AS94_06460 | GNAT family acetyltransferase                     | -0.981 | 0.000 | 0.000 |
| AS94_06465 | ferredoxin--NADP reductase                        | -1.499 | 0.000 | 0.000 |
| AS94_06490 | PTS sucrose transporter subunit IIBC              | -2.511 | 0.000 | 0.000 |
| AS94_06550 | LuxR family transcriptional regulator             | -0.772 | 0.000 | 0.000 |
| AS94_06555 | sensor histidine kinase                           | -0.758 | 0.000 | 0.000 |
| AS94_06560 | nreA protein                                      | -0.869 | 0.000 | 0.000 |
| AS94_06565 | nitrate reductase subunit gamma                   | -0.879 | 0.000 | 0.000 |
| AS94_06570 | nitrate reductase subunit delta                   | -1.490 | 0.000 | 0.000 |
| AS94_06575 | nitrate reductase                                 | -0.998 | 0.000 | 0.000 |
| AS94_06580 | nitrate reductase                                 | -1.111 | 0.000 | 0.000 |
| AS94_06585 | uroporphyrinogen III methyltransferase            | -1.230 | 0.000 | 0.000 |
| AS94_06590 | nitrite reductase NAD(P)H small subunit           | -0.916 | 0.000 | 0.001 |
| AS94_06595 | nitrite reductase                                 | -1.216 | 0.000 | 0.000 |
| AS94_06600 | cobalamin biosynthesis protein CbiX               | -1.105 | 0.000 | 0.000 |
| AS94_06625 | zinc ABC transporter substrate-binding<br>protein | -0.421 | 0.007 | 0.016 |
| AS94_06630 | protein-disulfide isomerase                       | -0.766 | 0.000 | 0.000 |
| AS94_06635 | hypothetical protein                              | -0.755 | 0.003 | 0.008 |

|            |                                                           |        |       |       |
|------------|-----------------------------------------------------------|--------|-------|-------|
| AS94_06665 | hypothetical protein                                      | -1.160 | 0.001 | 0.002 |
| AS94_06745 | hypothetical protein                                      | -1.320 | 0.000 | 0.001 |
| AS94_06765 | bicyclomycin transporter TcaB                             | -0.428 | 0.001 | 0.003 |
| AS94_06775 | hypothetical protein                                      | -0.705 | 0.000 | 0.000 |
| AS94_06785 | alanine glycine permease                                  | -0.741 | 0.000 | 0.000 |
| AS94_06795 | amino acid permease                                       | -1.054 | 0.000 | 0.000 |
| AS94_06805 | epimerase                                                 | -0.584 | 0.000 | 0.000 |
| AS94_06810 | 2-dehydropantoate 2-reductase                             | -1.502 | 0.000 | 0.000 |
| AS94_06815 | quinolone resistance protein NorB                         | -0.820 | 0.000 | 0.000 |
| AS94_06820 | amino acid ABC transporter permease                       | -1.528 | 0.000 | 0.000 |
| AS94_06825 | glycine/betaine ABC transporter substrate-binding protein | -1.462 | 0.000 | 0.000 |
| AS94_06830 | choline ABC transporter permease                          | -0.926 | 0.000 | 0.000 |
| AS94_06835 | glycine/betaine ABC transporter ATP-binding protein       | -1.096 | 0.000 | 0.000 |
| AS94_06840 | hypothetical protein                                      | -0.818 | 0.000 | 0.000 |
| AS94_06845 | amino acid:proton symporter                               | -0.696 | 0.000 | 0.000 |
| AS94_06860 | membrane protein                                          | -0.668 | 0.000 | 0.000 |
| AS94_06870 | peptidase M28                                             | -1.188 | 0.000 | 0.000 |
| AS94_06875 | hypothetical protein                                      | -0.995 | 0.000 | 0.000 |
| AS94_06910 | nickel ABC transporter permease                           | -0.681 | 0.024 | 0.049 |
| AS94_06915 | nickel ABC transporter substrate-binding protein          | -0.836 | 0.000 | 0.000 |
| AS94_06985 | hypothetical protein                                      | -1.655 | 0.000 | 0.000 |
| AS94_06990 | hypothetical protein                                      | -0.980 | 0.000 | 0.000 |
| AS94_06995 | hypothetical protein                                      | -1.651 | 0.000 | 0.000 |
| AS94_07000 | hypothetical protein                                      | -0.944 | 0.000 | 0.000 |
| AS94_07010 | hypothetical protein                                      | -0.929 | 0.000 | 0.000 |
| AS94_07025 | helicase                                                  | -0.278 | 0.024 | 0.049 |
| AS94_07050 | UTP--glucose-1-phosphate uridylyltransferase              | -0.864 | 0.000 | 0.000 |
| AS94_07055 | fibronectin-binding protein A                             | -0.675 | 0.000 | 0.000 |
| AS94_07065 | gluconate permease                                        | -1.314 | 0.000 | 0.000 |

|            |                                                     |        |       |       |
|------------|-----------------------------------------------------|--------|-------|-------|
| AS94_07070 | gluconokinase                                       | -0.704 | 0.000 | 0.000 |
| AS94_07075 | GntR family transcriptional regulator               | -0.581 | 0.000 | 0.001 |
| AS94_07080 | MerR family transcriptional regulator               | -1.248 | 0.000 | 0.000 |
| AS94_07120 | fructose-1_6-bisphosphatase                         | -0.684 | 0.000 | 0.000 |
| AS94_07130 | carboxylesterase                                    | -1.216 | 0.000 | 0.000 |
| AS94_07135 | glyoxalase                                          | -0.813 | 0.000 | 0.000 |
| AS94_07140 | MarR family transcriptional regulator               | -1.298 | 0.000 | 0.000 |
| AS94_07145 | acetyltransferase                                   | -0.474 | 0.006 | 0.015 |
| AS94_07150 | glyoxalase                                          | -0.476 | 0.003 | 0.008 |
| AS94_07155 | NAD(P)H nitroreductase                              | -0.572 | 0.000 | 0.000 |
| AS94_07165 | HAD family hydrolase                                | -0.690 | 0.000 | 0.001 |
| AS94_07215 | esterase                                            | -1.153 | 0.000 | 0.000 |
| AS94_07225 | acyl-CoA thioester hydrolase                        | -1.124 | 0.000 | 0.000 |
| AS94_07230 | PTS glucose transporter subunit IIBC                | -1.180 | 0.000 | 0.000 |
| AS94_07235 | pyruvate oxidase                                    | -0.789 | 0.000 | 0.000 |
| AS94_07240 | holin                                               | -0.434 | 0.000 | 0.001 |
| AS94_07245 | holin                                               | -2.360 | 0.000 | 0.000 |
| AS94_07265 | hydroxymethylglutaryl-CoA reductase                 | -0.342 | 0.008 | 0.018 |
| AS94_07275 | methylated DNA-protein cysteine S-methyltransferase | -0.767 | 0.000 | 0.000 |
| AS94_07315 | maltose O-acetyltransferase                         | -0.514 | 0.023 | 0.047 |
| AS94_07325 | ATPase P                                            | -0.536 | 0.001 | 0.002 |
| AS94_07395 | TetR family transcriptional regulator               | -0.747 | 0.001 | 0.002 |
| AS94_07475 | fructosamine-3-kinase                               | -0.562 | 0.000 | 0.000 |
| AS94_07510 | aspartate decarboxylase                             | -0.527 | 0.001 | 0.003 |
| AS94_07515 | pantoate--beta-alanine ligase                       | -0.395 | 0.003 | 0.006 |
| AS94_07520 | 3-methyl-2-oxobutanoate hydroxymethyltransferase    | -0.444 | 0.005 | 0.012 |
| AS94_07530 | alpha-acetolactate decarboxylase                    | -0.837 | 0.000 | 0.000 |
| AS94_07555 | fructose-bisphosphate aldolase                      | -0.487 | 0.000 | 0.000 |
| AS94_07560 | malate:quinone oxidoreductase                       | -0.437 | 0.000 | 0.000 |
| AS94_07570 | acyl--CoA ligase                                    | -0.676 | 0.000 | 0.000 |
| AS94_07590 | betaine-aldehyde dehydrogenase                      | -0.445 | 0.003 | 0.008 |

|            |                                                             |        |       |       |
|------------|-------------------------------------------------------------|--------|-------|-------|
| AS94_07595 | hypothetical protein                                        | -0.387 | 0.019 | 0.040 |
| AS94_07600 | choline transporter BetT                                    | -0.433 | 0.008 | 0.017 |
| AS94_07605 | ribonucleoside-triphosphate reductase<br>activating protein | -0.633 | 0.000 | 0.000 |
| AS94_07610 | ribonucleoside triphosphate reductase                       | -0.347 | 0.020 | 0.041 |
| AS94_07620 | precorrin-2 dehydrogenase                                   | -0.640 | 0.000 | 0.000 |
| AS94_07625 | sulfite reductase subunit alpha                             | -0.583 | 0.000 | 0.000 |
| AS94_07635 | peptide ABC transporter permease                            | -0.610 | 0.000 | 0.001 |
| AS94_07675 | tributylin esterase                                         | -0.817 | 0.000 | 0.000 |
| AS94_07685 | hypothetical protein                                        | -0.997 | 0.001 | 0.002 |
| AS94_07690 | type I restriction endonuclease subunit S                   | -0.999 | 0.000 | 0.000 |
| AS94_07700 | RNA helicase                                                | -0.925 | 0.000 | 0.000 |
| AS94_07710 | hypothetical protein                                        | -0.768 | 0.000 | 0.000 |
| AS94_07715 | hypothetical protein                                        | -1.180 | 0.000 | 0.000 |
| AS94_07720 | transposase                                                 | -0.856 | 0.000 | 0.000 |
| AS94_07800 | Vitamin B12 ABC transporter substrate-<br>binding protein   | -0.665 | 0.000 | 0.000 |
| AS94_07805 | enterobactin ABC transporter permease                       | -0.592 | 0.003 | 0.008 |
| AS94_07810 | HAD family hydrolase                                        | -0.757 | 0.000 | 0.001 |
| AS94_07815 | alpha/beta hydrolase                                        | -0.934 | 0.000 | 0.000 |
| AS94_07820 | hypothetical protein                                        | -1.127 | 0.000 | 0.000 |
| AS94_07925 | N-acetylmannosaminyltransferase                             | -0.491 | 0.004 | 0.009 |
| AS94_07930 | teichoic acid ABC transporter ATP-binding<br>protein        | -0.445 | 0.000 | 0.001 |
| AS94_07965 | nucleoside permease                                         | -0.894 | 0.000 | 0.000 |
| AS94_07975 | iron-dicitrate ABC transporter ATP-<br>binding protein      | -1.143 | 0.000 | 0.000 |
| AS94_07980 | ferrichrome ABC transporter permease                        | -1.020 | 0.000 | 0.000 |
| AS94_07985 | iron ABC transporter permease                               | -1.089 | 0.000 | 0.000 |
| AS94_07990 | dihydroxyacetone kinase subunit K                           | -0.370 | 0.005 | 0.013 |
| AS94_07995 | dihydroxyacetone kinase subunit L                           | -0.684 | 0.000 | 0.000 |
| AS94_08000 | PTS mannose transporter subunit IIA                         | -1.387 | 0.000 | 0.000 |
| AS94_08005 | hypothetical protein                                        | -0.456 | 0.000 | 0.001 |

|            |                                                    |        |       |       |
|------------|----------------------------------------------------|--------|-------|-------|
| AS94_08025 | acetyltransferase                                  | -0.866 | 0.000 | 0.000 |
| AS94_08030 | 3-beta hydroxysteroid dehydrogenase                | -0.466 | 0.001 | 0.004 |
| AS94_08050 | bacitracin ABC transporter permease                | -0.704 | 0.000 | 0.000 |
| AS94_08065 | peptidase M23B                                     | -0.353 | 0.003 | 0.007 |
| AS94_08070 | inhibitor of apoptosis-promoting Bax1              | -0.713 | 0.000 | 0.000 |
| AS94_08075 | AraC family transcriptional regulator              | -0.876 | 0.000 | 0.000 |
| AS94_08080 | MarR family transcriptional regulator              | -3.088 | 0.000 | 0.000 |
| AS94_08095 | hypothetical protein                               | -0.639 | 0.000 | 0.000 |
| AS94_08100 | LysR family transcriptional regulator              | -0.574 | 0.000 | 0.000 |
| AS94_08105 | sugar MFS transporter                              | -0.567 | 0.000 | 0.000 |
| AS94_08170 | MarR family transcriptional regulator              | -0.265 | 0.008 | 0.019 |
| AS94_08195 | deoxyribodipyrimidine photo-lyase                  | -0.283 | 0.011 | 0.024 |
| AS94_08220 | hypothetical protein                               | -0.499 | 0.007 | 0.017 |
| AS94_08225 | YbaK/EbsC protein                                  | -1.377 | 0.000 | 0.000 |
| AS94_08230 | DeoR family transcriptional regulator              | -0.660 | 0.001 | 0.003 |
| AS94_08235 | phosphofructokinase                                | -0.829 | 0.000 | 0.000 |
| AS94_08240 | PTS fructose transporter subunit IIC               | -0.562 | 0.000 | 0.000 |
| AS94_08280 | hypothetical protein                               | -0.403 | 0.004 | 0.009 |
| AS94_08335 | heme ABC transporter ATP-binding protein           | -0.953 | 0.000 | 0.000 |
| AS94_08340 | ATP-dependent DNA helicase RecQ                    | -1.423 | 0.000 | 0.000 |
| AS94_08370 | lipid kinase                                       | -0.310 | 0.006 | 0.015 |
| AS94_08390 | ribonucleotide reductase stimulatory protein       | -1.282 | 0.000 | 0.000 |
| AS94_08395 | ribonucleotide-diphosphate reductase subunit alpha | -0.892 | 0.000 | 0.000 |
| AS94_08405 | iron ABC transporter permease                      | -1.854 | 0.000 | 0.000 |
| AS94_08410 | iron ABC transporter permease                      | -1.730 | 0.000 | 0.000 |
| AS94_08415 | iron ABC transporter ATP-binding protein           | -1.111 | 0.000 | 0.000 |
| AS94_08420 | iron ABC transporter substrate-binding protein     | -0.488 | 0.005 | 0.012 |
| AS94_08485 | hypothetical protein                               | -1.288 | 0.000 | 0.000 |
| AS94_08530 | excinuclease ABC subunit B                         | -0.825 | 0.000 | 0.000 |

|            |                                                   |        |       |       |
|------------|---------------------------------------------------|--------|-------|-------|
| AS94_08565 | hypothetical protein                              | -0.438 | 0.019 | 0.040 |
| AS94_08620 | glyceraldehyde-3-phosphate<br>dehydrogenase       | -0.363 | 0.002 | 0.004 |
| AS94_08635 | phosphoglyceromutase                              | -0.365 | 0.004 | 0.009 |
| AS94_08640 | enolase                                           | -0.535 | 0.000 | 0.000 |
| AS94_08670 | hypothetical protein                              | -0.495 | 0.000 | 0.000 |
| AS94_08715 | virulence-associated protein E                    | -0.734 | 0.002 | 0.005 |
| AS94_08755 | pathogenicity island protein                      | -0.649 | 0.000 | 0.000 |
| AS94_08855 | serine phosphatase                                | -0.461 | 0.000 | 0.000 |
| AS94_08860 | PemK family transcriptional regulator             | -0.446 | 0.004 | 0.011 |
| AS94_08870 | alanine racemase                                  | -0.386 | 0.002 | 0.004 |
| AS94_08895 | potassium-transporting ATPase subunit C           | -1.023 | 0.000 | 0.000 |
| AS94_08900 | potassium-transporting ATPase subunit B           | -0.653 | 0.003 | 0.007 |
| AS94_08915 | histidine kinase                                  | -0.357 | 0.020 | 0.041 |
| AS94_08975 | thiamine-phosphate pyrophosphorylase              | -0.830 | 0.007 | 0.015 |
| AS94_08980 | hydroxyethylthiazole kinase                       | -0.881 | 0.013 | 0.027 |
| AS94_09000 | single-stranded DNA-binding protein               | -1.486 | 0.000 | 0.000 |
| AS94_09005 | hypothetical protein                              | -0.490 | 0.013 | 0.029 |
| AS94_09140 | fructose-bisphosphate aldolase                    | -0.803 | 0.000 | 0.000 |
| AS94_09145 | hypothetical protein                              | -0.534 | 0.004 | 0.009 |
| AS94_09170 | hypothetical protein                              | -0.457 | 0.001 | 0.003 |
| AS94_09190 | membrane protein                                  | -1.187 | 0.000 | 0.000 |
| AS94_09195 | pyrimidine-nucleoside phosphorylase               | -1.176 | 0.000 | 0.000 |
| AS94_09200 | deoxyribose-phosphate aldolase                    | -0.624 | 0.000 | 0.000 |
| AS94_09210 | general stress protein                            | -1.882 | 0.000 | 0.000 |
| AS94_09295 | FmtB protein                                      | -1.108 | 0.000 | 0.000 |
| AS94_09375 | MarR family transcriptional regulator             | -0.887 | 0.000 | 0.000 |
| AS94_09385 | siderophore ABC transporter permease              | -1.180 | 0.003 | 0.007 |
| AS94_09390 | iron ABC transporter substrate-binding<br>protein | -1.246 | 0.000 | 0.000 |
| AS94_09415 | siderophore biosynthesis protein SbnE             | -0.589 | 0.020 | 0.041 |
| AS94_09455 | acetoin reductase                                 | -1.696 | 0.000 | 0.000 |
| AS94_09485 | superoxide dismutase                              | -2.825 | 0.000 | 0.000 |

|            |                                                        |        |       |       |
|------------|--------------------------------------------------------|--------|-------|-------|
| AS94_09515 | phosphopentomutase                                     | -0.774 | 0.000 | 0.000 |
| AS94_09545 | 2'_ 3'-cyclic nucleotide 2'-<br>phosphodiesterase      | -1.076 | 0.000 | 0.000 |
| AS94_09555 | bifunctional acetaldehyde-CoA/alcohol<br>dehydrogenase | -0.539 | 0.000 | 0.000 |
| AS94_09640 | monooxygenase IsdI                                     | -0.956 | 0.016 | 0.034 |
| AS94_09645 | hypothetical protein                                   | -1.375 | 0.000 | 0.000 |
| AS94_09700 | 4'-phosphopantetheinyl transferase                     | -0.897 | 0.000 | 0.000 |
| AS94_09705 | hypothetical protein                                   | -1.027 | 0.000 | 0.000 |
| AS94_09735 | isochorismatase                                        | -0.795 | 0.000 | 0.000 |
| AS94_09740 | pyruvate decarboxylase                                 | -0.706 | 0.000 | 0.000 |
| AS94_09750 | PTS glucose transporter subunit IIABC                  | -1.301 | 0.000 | 0.000 |
| AS94_09785 | ABC transporter ATP-binding protein                    | -1.287 | 0.000 | 0.000 |
| AS94_09815 | azoreductase                                           | -1.128 | 0.000 | 0.000 |
| AS94_09825 | sugar ABC transporter ATP-binding<br>protein           | -1.195 | 0.000 | 0.000 |
| AS94_09830 | ABC transporter substrate-binding protein              | -1.413 | 0.000 | 0.000 |
| AS94_09835 | arabinogalactan ABC transporter permease               | -1.200 | 0.000 | 0.000 |
| AS94_09840 | arabinogalactan ABC transporter permease               | -1.501 | 0.000 | 0.000 |
| AS94_09845 | oxidoreductase                                         | -2.229 | 0.000 | 0.000 |
| AS94_09850 | NADH-dependent dehydrogenase                           | -2.559 | 0.000 | 0.000 |
| AS94_09855 | xylose isomerase                                       | -2.694 | 0.000 | 0.000 |
| AS94_09870 | AraC family transcriptional regulator                  | -1.041 | 0.000 | 0.000 |
| AS94_09885 | formate acetyltransferase                              | -2.478 | 0.000 | 0.000 |
| AS94_09890 | pyruvate formate lyase-activating protein              | -2.527 | 0.000 | 0.000 |
| AS94_09895 | hypothetical protein                                   | -1.630 | 0.000 | 0.000 |
| AS94_09900 | glycerophosphoryl diester<br>phosphodiesterase         | -0.558 | 0.000 | 0.001 |
| AS94_09980 | nitric oxide dioxygenase                               | -0.698 | 0.000 | 0.000 |
| AS94_09990 | PTS glucose transporter subunit IIB                    | -1.095 | 0.000 | 0.000 |
| AS94_10020 | sorbitol dehydrogenase                                 | -0.901 | 0.006 | 0.014 |
| AS94_10030 | iditol 2-dehydrogenase                                 | -1.095 | 0.000 | 0.000 |
| AS94_10075 | cell wall biosynthesis protein ScdA                    | -0.712 | 0.000 | 0.000 |



|            |                                                                  |        |       |       |
|------------|------------------------------------------------------------------|--------|-------|-------|
| AS94_10080 | sensor histidine kinase                                          | -0.941 | 0.000 | 0.000 |
| AS94_10085 | LytR family transcriptional regulator                            | -0.828 | 0.000 | 0.001 |
| AS94_10090 | murein hydrolase regulator LrgA                                  | -0.780 | 0.000 | 0.000 |
| AS94_10100 | GntR family transcriptional regulator                            | -0.750 | 0.000 | 0.000 |
| AS94_10105 | phosphoenolpyruvate-dependent sugar<br>PTS family porter_ EIIA 1 | -2.185 | 0.000 | 0.000 |
| AS94_10110 | aryl-phospho-beta-D-glucosidase                                  | -1.718 | 0.000 | 0.000 |
| AS94_10115 | hypothetical protein                                             | -1.156 | 0.000 | 0.000 |
| AS94_10140 | LacI family transcriptional regulator                            | -1.287 | 0.000 | 0.000 |
| AS94_10155 | penicillin V acylase                                             | -0.996 | 0.000 | 0.000 |
| AS94_10255 | hypothetical protein                                             | -0.598 | 0.000 | 0.001 |
| AS94_10320 | formate/nitrite transporter                                      | -0.783 | 0.000 | 0.000 |
| AS94_10330 | 5'-nucleotidase                                                  | -0.675 | 0.001 | 0.001 |
| AS94_10355 | pseudouridine-5'-phosphate glycosidase                           | -0.803 | 0.000 | 0.000 |
| AS94_10365 | sialic acid transporter                                          | -1.527 | 0.000 | 0.000 |
| AS94_10370 | N-acetylneuraminate lyase                                        | -1.747 | 0.000 | 0.000 |
| AS94_10375 | N-acetylmannosamine kinase                                       | -0.868 | 0.000 | 0.000 |
| AS94_10380 | RpiR family transcriptional regulator                            | -0.609 | 0.000 | 0.000 |
| AS94_10385 | N-acetylmannosamine-6-phosphate 2-<br>epimerase                  | -0.821 | 0.000 | 0.000 |
| AS94_10400 | alpha/beta hydrolase                                             | -0.831 | 0.000 | 0.000 |
| AS94_10455 | MarR family transcriptional regulator                            | -0.503 | 0.007 | 0.017 |
| AS94_10475 | glyoxalase                                                       | -0.559 | 0.009 | 0.020 |
| AS94_10480 | luciferase                                                       | -1.058 | 0.000 | 0.000 |
| AS94_10485 | FMN reductase                                                    | -0.591 | 0.015 | 0.032 |
| AS94_10490 | membrane protein                                                 | -0.960 | 0.000 | 0.000 |
| AS94_10665 | hypothetical protein                                             | -1.408 | 0.000 | 0.000 |
| AS94_10675 | phosphoglycerate mutase                                          | -0.449 | 0.012 | 0.026 |
| AS94_10685 | hypothetical protein                                             | -0.397 | 0.003 | 0.008 |
| AS94_10700 | alkyl hydroperoxide reductase subunit C                          | -0.477 | 0.000 | 0.000 |
| AS94_10705 | NADPH-dependent oxidoreductase                                   | -0.566 | 0.000 | 0.001 |
| AS94_10730 | xanthine phosphoribosyltransferase                               | -1.458 | 0.000 | 0.000 |
| AS94_10735 | xanthine permease                                                | -1.145 | 0.000 | 0.000 |

|            |                                               |        |       |       |
|------------|-----------------------------------------------|--------|-------|-------|
| AS94_10740 | inosine 5'-monophosphate dehydrogenase        | -1.063 | 0.000 | 0.000 |
| AS94_10745 | GMP synthase                                  | -0.806 | 0.000 | 0.000 |
| AS94_10815 | membrane protein                              | -1.762 | 0.000 | 0.000 |
| AS94_10820 | 3-beta hydroxysteroid dehydrogenase           | -1.256 | 0.000 | 0.000 |
| AS94_10890 | hypothetical protein                          | -0.978 | 0.000 | 0.000 |
| AS94_10895 | hypothetical protein                          | -1.471 | 0.003 | 0.006 |
| AS94_10940 | NADH dehydrogenase subunit 5                  | -0.803 | 0.000 | 0.000 |
| AS94_10945 | hypothetical protein                          | -0.713 | 0.000 | 0.000 |
| AS94_10950 | hypothetical protein                          | -0.447 | 0.001 | 0.002 |
| AS94_10965 | carboxylesterase                              | -0.830 | 0.000 | 0.000 |
| AS94_10970 | sodium-dependent transporter                  | -0.471 | 0.008 | 0.017 |
| AS94_11000 | N-acetylmuramoyl-L-alanine amidase            | -0.384 | 0.001 | 0.002 |
| AS94_11020 | hypothetical protein                          | -0.830 | 0.000 | 0.000 |
| AS94_11025 | hypothetical protein                          | -0.701 | 0.000 | 0.000 |
| AS94_11050 | PTS ascorbate transporter subunit IIA         | -0.806 | 0.000 | 0.000 |
| AS94_11075 | DNA polymerase III subunit gamma/tau          | -0.323 | 0.006 | 0.014 |
| AS94_11080 | hypothetical protein                          | -0.618 | 0.002 | 0.005 |
| AS94_11090 | adhesin                                       | -1.569 | 0.000 | 0.000 |
| AS94_11095 | 2-oxoglutarate translocator                   | -0.887 | 0.000 | 0.000 |
| AS94_11100 | chloramphenicol-sensitive protein RarD        | -0.445 | 0.009 | 0.020 |
| AS94_11110 | nickel transporter NixA                       | -0.701 | 0.000 | 0.000 |
| AS94_11115 | N-acetyltransferase                           | -0.617 | 0.000 | 0.000 |
| AS94_11145 | cold-shock protein                            | -0.635 | 0.000 | 0.000 |
| AS94_11150 | Cro/CI family transcriptional regulator       | -1.114 | 0.000 | 0.000 |
| AS94_11155 | hypothetical protein                          | -1.053 | 0.000 | 0.000 |
| AS94_11160 | hypothetical protein                          | -1.163 | 0.000 | 0.000 |
| AS94_11225 | carbohydrate kinase                           | -1.327 | 0.000 | 0.000 |
| AS94_11265 | 50S ribosomal protein L9                      | -0.585 | 0.000 | 0.000 |
| AS94_11270 | replicative DNA helicase                      | -0.915 | 0.000 | 0.000 |
| AS94_11400 | recombinase RecA                              | -0.609 | 0.002 | 0.005 |
| AS94_11465 | branched-chain amino acid<br>aminotransferase | -0.377 | 0.000 | 0.001 |
| AS94_11480 | molecular chaperone                           | -0.896 | 0.000 | 0.000 |

|            |                                                                                                           |        |       |       |
|------------|-----------------------------------------------------------------------------------------------------------|--------|-------|-------|
| AS94_11495 | elongation factor Tu                                                                                      | -0.311 | 0.006 | 0.015 |
| AS94_11520 | DNA-directed RNA polymerase subunit<br>beta'                                                              | -0.414 | 0.000 | 0.000 |
| AS94_11525 | DNA-directed RNA polymerase subunit<br>beta                                                               | -0.292 | 0.009 | 0.019 |
| AS94_11600 | glutamyl-tRNA synthase                                                                                    | -0.584 | 0.000 | 0.000 |
| AS94_11645 | pyridoxal biosynthesis protein                                                                            | -0.347 | 0.004 | 0.009 |
| AS94_11660 | adhesin                                                                                                   | -2.593 | 0.000 | 0.000 |
| AS94_11670 | pyrrolidone-carboxylate peptidase                                                                         | -1.024 | 0.000 | 0.000 |
| AS94_11690 | polysaccharide deacetylase                                                                                | -1.341 | 0.000 | 0.000 |
| AS94_11695 | ATP phosphoribosyltransferase                                                                             | -2.684 | 0.000 | 0.000 |
| AS94_11700 | ATP phosphoribosyltransferase                                                                             | -2.917 | 0.000 | 0.000 |
| AS94_11705 | histidinol dehydrogenase                                                                                  | -2.248 | 0.000 | 0.000 |
| AS94_11710 | histidinol-phosphate aminotransferase                                                                     | -2.002 | 0.000 | 0.000 |
| AS94_11715 | imidazoleglycerol-phosphate dehydratase                                                                   | -1.603 | 0.009 | 0.020 |
| AS94_11720 | imidazole glycerol phosphate synthase                                                                     | -1.820 | 0.001 | 0.002 |
| AS94_11725 | 1-(5-phosphoribosyl)-5-[(5-<br>phosphoribosylamino)methylideneamino]<br>imidazole-4-carboxamide isomerase | -1.342 | 0.000 | 0.001 |
| AS94_11730 | imidazole glycerol phosphate synthase                                                                     | -0.959 | 0.004 | 0.010 |
| AS94_11735 | phosphoribosyl-AMP cyclohydrolase                                                                         | -0.876 | 0.000 | 0.000 |
| AS94_11760 | N-glycosyltransferase                                                                                     | -1.459 | 0.000 | 0.000 |
| AS94_11830 | adhesin                                                                                                   | -0.661 | 0.000 | 0.000 |
| AS94_11835 | preprotein translocase subunit SecY                                                                       | -1.029 | 0.000 | 0.001 |
| AS94_11840 | Accessory Sec system protein Asp1                                                                         | -1.428 | 0.000 | 0.000 |
| AS94_11845 | accessory secretory protein Asp2                                                                          | -1.126 | 0.000 | 0.000 |
| AS94_11850 | Accessory Sec system protein Asp3                                                                         | -0.998 | 0.001 | 0.002 |
| AS94_11890 | mannose-6-phosphate isomerase                                                                             | -2.854 | 0.000 | 0.000 |
| AS94_11895 | PTS mannose transporter subunit IIABC                                                                     | -2.655 | 0.000 | 0.000 |
| AS94_11905 | hypothetical protein                                                                                      | -0.654 | 0.001 | 0.004 |
| AS94_11910 | hypothetical protein                                                                                      | -0.409 | 0.001 | 0.001 |
| AS94_11915 | aureolysin                                                                                                | -0.799 | 0.000 | 0.001 |
| AS94_11920 | ArgR family transcriptional regulator                                                                     | -0.767 | 0.002 | 0.005 |

|            |                 |                                      |        |       |       |
|------------|-----------------|--------------------------------------|--------|-------|-------|
| AS94_11925 |                 | arginine deiminase                   | -1.650 | 0.000 | 0.000 |
| AS94_11930 |                 | ornithine carbamoyltransferase       | -0.787 | 0.000 | 0.000 |
| AS94_11935 |                 | amino acid APC transporter           | -0.309 | 0.023 | 0.046 |
| AS94_11960 |                 | Fur family transcriptional regulator | -0.743 | 0.000 | 0.000 |
| AS94_11980 |                 | membrane protein                     | -0.302 | 0.021 | 0.042 |
| AS94_12005 |                 | membrane protein                     | -0.503 | 0.002 | 0.004 |
| AS94_12380 |                 | hypothetical protein                 | -0.881 | 0.000 | 0.000 |
| AS94_12470 |                 | ferritin                             | -0.759 | 0.000 | 0.000 |
| AS94_12565 |                 | membrane protein                     | -0.577 | 0.000 | 0.001 |
| AS94_12570 |                 | NAD synthetase                       | -0.437 | 0.002 | 0.006 |
| AS94_12575 |                 | nicotinate phosphoribosyltransferase | -0.365 | 0.011 | 0.025 |
| AS94_12585 |                 | prephenate dehydratase               | -0.689 | 0.000 | 0.000 |
| AS94_12605 |                 | pyrophosphatase                      | -0.684 | 0.000 | 0.000 |
| AS94_12610 |                 | aldehyde dehydrogenase               | -0.768 | 0.000 | 0.000 |
| AS94_12745 |                 | phospholipase                        | -0.832 | 0.001 | 0.001 |
| AS94_12785 |                 | hypothetical protein                 | -1.400 | 0.000 | 0.000 |
| AS94_12815 |                 | peptidase M23                        | -0.821 | 0.000 | 0.001 |
| AS94_12825 |                 | gamma-hemolysin subunit B            | -0.743 | 0.001 | 0.001 |
| AS94_12865 |                 | nitroreductase                       | -0.506 | 0.000 | 0.000 |
| AS94_12875 | <i>hld</i>      | delta-hemolysin                      | -0.725 | 0.000 | 0.000 |
| AS94_12880 | <i>agrB</i>     | accessory gene regulator B           | -0.893 | 0.000 | 0.000 |
| AS94_12890 | <i>agrC</i>     | histidine kinase                     | -0.607 | 0.000 | 0.000 |
| AS94_12895 | <i>agrA</i>     | histidine kinase                     | -0.952 | 0.000 | 0.000 |
| AS94_12900 |                 | fructokinase                         | -0.915 | 0.000 | 0.000 |
| AS94_12905 |                 | sucrose-6-phosphate hydrolase        | -0.487 | 0.000 | 0.000 |
| AS94_12945 |                 | O-sialoglycoprotein endopeptidase    | -0.317 | 0.011 | 0.024 |
| AS94_13015 |                 | hypothetical protein                 | -3.718 | 0.007 | 0.017 |
| AS94_13445 |                 | protoporphyrinogen oxidase           | -0.334 | 0.021 | 0.043 |
| AS94_13475 |                 | cell-cycle regulation protein HIT    | -1.061 | 0.000 | 0.000 |
| AS94_12245 |                 | hypothetical protein                 | -2.279 | 0.000 | 0.001 |
| AS94_12265 | $\phi$ SA169    | hypothetical protein                 | -0.776 | 0.016 | 0.033 |
| AS94_12285 |                 | DNA replication protein DnaC         | -0.520 | 0.008 | 0.018 |
| AS94_13030 | mutual prophage | hypothetical protein                 | -1.362 | 0.000 | 0.000 |

|            |                                      |        |       |       |
|------------|--------------------------------------|--------|-------|-------|
| AS94_13035 | enterotoxin                          | -0.920 | 0.000 | 0.000 |
| AS94_13070 | autolysin                            | -2.341 | 0.000 | 0.000 |
| AS94_13075 | holin                                | -3.249 | 0.000 | 0.000 |
| AS94_13080 | hypothetical protein                 | -2.507 | 0.000 | 0.000 |
| AS94_13090 | hypothetical protein                 | -2.399 | 0.000 | 0.000 |
| AS94_13095 | hypothetical protein                 | -2.348 | 0.000 | 0.000 |
| AS94_13100 | minor structural protein             | -2.067 | 0.000 | 0.000 |
| AS94_13105 | hypothetical protein                 | -2.466 | 0.008 | 0.018 |
| AS94_13110 | peptidase                            | -2.176 | 0.000 | 0.000 |
| AS94_13115 | holin                                | -2.245 | 0.000 | 0.000 |
| AS94_13120 | tail protein                         | -2.112 | 0.000 | 0.000 |
| AS94_13130 | hypothetical protein                 | -2.801 | 0.000 | 0.000 |
| AS94_13135 | tail protein                         | -2.071 | 0.000 | 0.000 |
| AS94_13140 | tail protein                         | -2.123 | 0.000 | 0.000 |
| AS94_13145 | hypothetical protein                 | -2.075 | 0.004 | 0.010 |
| AS94_13150 | hypothetical protein                 | -1.718 | 0.000 | 0.000 |
| AS94_13155 | hypothetical protein                 | -1.746 | 0.006 | 0.014 |
| AS94_13160 | hypothetical protein                 | -2.242 | 0.000 | 0.000 |
| AS94_13165 | phage capsid protein                 | -2.095 | 0.000 | 0.000 |
| AS94_13170 | ATP-dependent Clp protease ClpP      | -2.070 | 0.000 | 0.000 |
| AS94_13175 | portal protein                       | -1.790 | 0.000 | 0.000 |
| AS94_13180 | terminase                            | -1.797 | 0.000 | 0.000 |
| AS94_13185 | terminase                            | -1.594 | 0.000 | 0.000 |
| AS94_13190 | HNH endonuclease                     | -1.492 | 0.001 | 0.004 |
| AS94_13195 | transcriptional regulator            | -1.929 | 0.000 | 0.000 |
| AS94_13200 | helicase                             | -1.557 | 0.000 | 0.000 |
| AS94_13205 | hypothetical protein                 | -1.435 | 0.000 | 0.000 |
| AS94_13220 | hypothetical protein                 | -1.711 | 0.000 | 0.000 |
| AS94_13235 | Dimeric dUTPase                      | -0.916 | 0.000 | 0.001 |
| AS94_13350 | hypothetical protein                 | -1.164 | 0.007 | 0.015 |
| AS94_13355 | antirepressor                        | -0.741 | 0.000 | 0.000 |
| AS94_13360 | hypothetical protein                 | -1.727 | 0.000 | 0.000 |
| AS94_13370 | hypothetical protein                 | -0.962 | 0.000 | 0.000 |
| AS94_13375 | XRE family transcriptional regulator | -1.445 | 0.000 | 0.000 |

|            |                      |        |       |       |
|------------|----------------------|--------|-------|-------|
| AS94_13390 | hypothetical protein | -0.899 | 0.000 | 0.000 |
|------------|----------------------|--------|-------|-------|
