# Supplementary material for: Transcriptome Analyses of Prophage in Mediating Persistent Methicillin-Resistant Staphylococcus aureus Endovascular Infection
Source: MDPI journal article supplement (doi:10.3390/genes13091527), 2022-08-25
Supplement: s1 [file s1]

Table S6. Down-regulated DEGs in 300-169 vs. 301-188::φSA169

| locus      | gene | group      | product                                           | log <sub>2</sub> (fold change) | p value | p adj |
|------------|------|------------|---------------------------------------------------|--------------------------------|---------|-------|
| AS94_00045 |      |            | membrane protein                                  | -0.567                         | 0.007   | 0.016 |
| AS94_00055 |      |            | dipeptidyl aminopeptidase                         | -0.623                         | 0.000   | 0.000 |
| AS94_00075 |      |            | glyoxal reductase                                 | -0.346                         | 0.017   | 0.036 |
| AS94_00110 |      |            | membrane protein                                  | -0.611                         | 0.000   | 0.001 |
| AS94_00195 |      |            | multidrug MFS transporter                         | -0.461                         | 0.001   | 0.002 |
| AS94_00205 |      |            | hypothetical protein                              | -0.894                         | 0.000   | 0.000 |
| AS94_00215 |      |            | NAD(FAD)-utilizing dehydrogenase                  | -0.387                         | 0.017   | 0.036 |
| AS94_00245 |      |            | phosphotransferase                                | -0.916                         | 0.000   | 0.000 |
| AS94_00250 |      |            | tRNA (guanine-N(7)-)-methyltransferase            | -0.563                         | 0.000   | 0.000 |
| AS94_00255 |      |            | hypothetical protein                              | -0.895                         | 0.000   | 0.000 |
| AS94_00270 |      |            | thioredoxin                                       | -0.406                         | 0.004   | 0.010 |
| AS94_00305 |      |            | 3-deoxy-7-phosphoheptulonate synthase             | -1.566                         | 0.000   | 0.000 |
| AS94_00345 |      |            | tyrosyl-tRNA synthase                             | -0.433                         | 0.001   | 0.003 |
| AS94_00355 |      |            | 1-acyl-sn-glycerol-3-phosphate<br>acyltransferase | -0.410                         | 0.014   | 0.032 |
| AS94_00370 |      | host genes | 3-phosphoglycerate dehydrogenase                  | -0.480                         | 0.001   | 0.002 |
| AS94_00395 |      |            | hypothetical protein                              | -0.572                         | 0.001   | 0.003 |
| AS94_00435 |      |            | universal stress protein UspA                     | -1.876                         | 0.000   | 0.000 |
| AS94_00445 |      |            | dipeptidase                                       | -0.632                         | 0.000   | 0.000 |
| AS94_00450 |      |            | beta-lactamase                                    | -1.457                         | 0.000   | 0.000 |
| AS94_00460 |      |            | universal stress protein UspA                     | -1.219                         | 0.000   | 0.000 |
| AS94_00500 |      |            | acetyl-CoA carboxylase subunit alpha              | -0.284                         | 0.014   | 0.032 |
| AS94_00505 |      |            | 6-phosphofructokinase                             | -1.025                         | 0.000   | 0.000 |
| AS94_00510 |      |            | pyruvate kinase                                   | -0.834                         | 0.000   | 0.000 |
| AS94_00525 |      |            | isocitrate dehydrogenase                          | -0.533                         | 0.000   | 0.000 |
| AS94_00545 |      |            | DNA polymerase I                                  | -0.455                         | 0.000   | 0.000 |
| AS94_00550 |      |            | formamidopyrimidine-DNA glycosylase               | -0.471                         | 0.000   | 0.000 |
| AS94_00555 |      |            | dephospho-CoA kinase                              | -1.236                         | 0.000   | 0.000 |
| AS94_00575 |      |            | primosomal protein DnaI                           | -0.388                         | 0.001   | 0.002 |
| AS94_00580 |      |            | threonyl-tRNA synthase                            | -1.991                         | 0.000   | 0.000 |
| AS94_00585 |      |            | gamma-aminobutyrate permease                      | -1.476                         | 0.000   | 0.000 |
| AS94_00645 |      |            | uroporphyrinogen III synthase                     | -0.371                         | 0.019   | 0.041 |

|            |                                           |        |       |       |
|------------|-------------------------------------------|--------|-------|-------|
| AS94_00650 | delta-aminolevulinic acid dehydratase     | -0.343 | 0.004 | 0.010 |
| AS94_00655 | glutamate-1-semialdehyde aminotransferase | -0.492 | 0.000 | 0.000 |
| AS94_00665 | DNA-3-methyladenine glycosylase           | -1.350 | 0.000 | 0.000 |
| AS94_00730 | 50S ribosomal protein L27                 | -1.359 | 0.000 | 0.000 |
| AS94_00735 | GTPase CgtA                               | -0.346 | 0.004 | 0.011 |
| AS94_00770 | preprotein translocase subunit SecD       | -0.244 | 0.021 | 0.044 |
| AS94_00785 | GTP pyrophosphokinase                     | -0.241 | 0.022 | 0.047 |
| AS94_00795 | cell wall amidase                         | -0.446 | 0.001 | 0.002 |
| AS94_00800 | hypothetical protein                      | -0.383 | 0.011 | 0.024 |
| AS94_00810 | aspartyl-tRNA synthase                    | -0.611 | 0.000 | 0.000 |
| AS94_00840 | hypothetical protein                      | -0.828 | 0.000 | 0.000 |
| AS94_00860 | hypothetical protein                      | -0.396 | 0.001 | 0.002 |
| AS94_00865 | alanyl-tRNA synthase                      | -0.431 | 0.000 | 0.000 |
| AS94_00870 | hypothetical protein                      | -0.541 | 0.001 | 0.002 |
| AS94_00875 | Holliday junction resolvase               | -0.446 | 0.000 | 0.001 |
| AS94_00880 | hypothetical protein                      | -0.433 | 0.001 | 0.003 |
| AS94_00905 | transcription elongation factor GreA      | -0.305 | 0.017 | 0.036 |
| AS94_01005 | deoxycytidylate deaminase                 | -0.694 | 0.000 | 0.000 |
| AS94_01185 | superoxide dismutase                      | -0.779 | 0.000 | 0.000 |
| AS94_01260 | shikimate kinase                          | -0.493 | 0.003 | 0.008 |
| AS94_01265 | glycine cleavage system protein T         | -0.518 | 0.000 | 0.001 |
| AS94_01270 | glycine dehydrogenase subunit 1           | -0.706 | 0.000 | 0.000 |
| AS94_01275 | glycine dehydrogenase subunit 2           | -1.029 | 0.000 | 0.000 |
| AS94_01370 | 2-oxoglutarate dehydrogenase E2           | -0.639 | 0.000 | 0.000 |
| AS94_01405 | transcriptional regulator                 | -0.834 | 0.000 | 0.000 |
| AS94_01410 | trehalose-6-phosphate hydrolase           | -1.788 | 0.000 | 0.000 |
| AS94_01430 | pyrroline-5-carboxylate reductase         | -0.677 | 0.000 | 0.000 |
| AS94_01460 | tyrosine recombinase XerD                 | -0.800 | 0.000 | 0.000 |
| AS94_01490 | sensor histidine kinase                   | -0.314 | 0.003 | 0.006 |
| AS94_01540 | asparaginase                              | -0.421 | 0.010 | 0.023 |
| AS94_01560 | glycerol-3-phosphate dehydrogenase        | -0.621 | 0.000 | 0.000 |
| AS94_01565 | DNA-binding protein                       | -0.780 | 0.000 | 0.000 |
| AS94_01630 | hypothetical protein                      | -0.463 | 0.022 | 0.046 |
| AS94_01665 | endonuclease III                          | -0.649 | 0.000 | 0.001 |

|            |                                                        |        |       |       |
|------------|--------------------------------------------------------|--------|-------|-------|
| AS94_01700 | hypothetical protein                                   | -0.461 | 0.000 | 0.000 |
| AS94_01735 | threonine dehydratase                                  | -0.402 | 0.011 | 0.025 |
| AS94_01745 | quinolone resistance protein NorB                      | -0.495 | 0.001 | 0.004 |
| AS94_01750 | matrix-binding protein                                 | -0.381 | 0.000 | 0.001 |
| AS94_01780 | hypothetical protein                                   | -0.648 | 0.000 | 0.000 |
| AS94_01795 | hypothetical protein                                   | -0.444 | 0.000 | 0.000 |
| AS94_01800 | methionine sulfoxide reductase A                       | -0.371 | 0.001 | 0.002 |
| AS94_01805 | methionine sulfoxide reductase B                       | -0.466 | 0.000 | 0.001 |
| AS94_01810 | PTS glucose transporter subunit IIA                    | -0.432 | 0.000 | 0.001 |
| AS94_01920 | hypothetical protein                                   | -0.943 | 0.000 | 0.000 |
| AS94_01935 | protease                                               | -0.909 | 0.000 | 0.000 |
| AS94_02055 | aminoacyltransferase                                   | -0.301 | 0.010 | 0.023 |
| AS94_02060 | aminoacyltransferase                                   | -0.300 | 0.022 | 0.046 |
| AS94_02100 | aminopeptidase                                         | -0.875 | 0.000 | 0.000 |
| AS94_02105 | prephenate dehydrogenase                               | -0.810 | 0.000 | 0.000 |
| AS94_02110 | DNA repair protein MucB                                | -1.518 | 0.000 | 0.000 |
| AS94_02115 | 4-oxalocrotonate tautomerase                           | -1.891 | 0.000 | 0.000 |
| AS94_02125 | methionine sulfoxide reductase A                       | -0.396 | 0.007 | 0.017 |
| AS94_02145 | transcriptional regulator                              | -0.709 | 0.001 | 0.002 |
| AS94_02165 | glycerol-3-phosphate acyltransferase                   | -0.377 | 0.002 | 0.006 |
| AS94_02230 | XRE family transcriptional regulator                   | -1.470 | 0.000 | 0.000 |
| AS94_02255 | 50S ribosomal protein L33                              | -0.422 | 0.012 | 0.027 |
| AS94_02270 | hypothetical protein                                   | -0.378 | 0.009 | 0.022 |
| AS94_02530 | tRNA delta(2)-isopentenylpyrophosphate transferase     | -0.411 | 0.020 | 0.044 |
| AS94_02535 | lysophospholipase                                      | -0.821 | 0.000 | 0.000 |
| AS94_02540 | glycerol-3-phosphate dehydrogenase                     | -0.747 | 0.000 | 0.000 |
| AS94_02590 | 2-oxoacid ferredoxin oxidoreductase subunit beta       | -1.289 | 0.000 | 0.000 |
| AS94_02595 | 2-oxoglutarate ferredoxin oxidoreductase subunit alpha | -1.245 | 0.000 | 0.000 |
| AS94_02615 | protein RecA                                           | -0.316 | 0.002 | 0.005 |
| AS94_02660 | cell division protein FtsK                             | -0.289 | 0.010 | 0.024 |
| AS94_02665 | ribonuclease J                                         | -0.474 | 0.000 | 0.000 |

|            |                                                     |        |       |       |
|------------|-----------------------------------------------------|--------|-------|-------|
| AS94_02690 | ribosome-binding factor A                           | -0.560 | 0.000 | 0.000 |
| AS94_02720 | DNA polymerase III subunit alpha                    | -0.432 | 0.000 | 0.000 |
| AS94_02865 | signal recognition particle protein Srp54           | -0.786 | 0.000 | 0.000 |
| AS94_02930 | 50S ribosomal protein L28                           | -1.954 | 0.000 | 0.000 |
| AS94_02935 | thiamine pyrophosphokinase                          | -0.441 | 0.021 | 0.044 |
| AS94_02990 | primosome assembly protein PriA                     | -0.645 | 0.000 | 0.000 |
| AS94_02995 | phosphopantothencysteine decarboxylase              | -0.662 | 0.000 | 0.000 |
| AS94_03000 | DNA-directed RNA polymerase subunit<br>omega        | -1.050 | 0.000 | 0.001 |
| AS94_03005 | guanylate kinase                                    | -0.338 | 0.007 | 0.017 |
| AS94_03060 | uracil phosphoribosyltransferase                    | -0.512 | 0.003 | 0.007 |
| AS94_03075 | glyoxalase                                          | -1.127 | 0.000 | 0.000 |
| AS94_03080 | isoleucyl-tRNA synthetase                           | -0.993 | 0.000 | 0.000 |
| AS94_03170 | 5'-nucleotidase                                     | -0.493 | 0.000 | 0.000 |
| AS94_03205 | hypothetical protein                                | -0.951 | 0.000 | 0.000 |
| AS94_03210 | carbamate kinase                                    | -2.256 | 0.000 | 0.000 |
| AS94_03215 | ornithine carbamoyltransferase                      | -0.686 | 0.000 | 0.000 |
| AS94_03290 | phosphoesterase                                     | -1.167 | 0.000 | 0.000 |
| AS94_03295 | deoxyribonucleotide triphosphate<br>pyrophosphatase | -1.136 | 0.000 | 0.000 |
| AS94_03300 | glutamate racemase                                  | -1.082 | 0.000 | 0.000 |
| AS94_03325 | thioredoxin                                         | -0.610 | 0.000 | 0.000 |
| AS94_03355 | phenylalanyl-tRNA synthase subunit beta             | -0.694 | 0.000 | 0.000 |
| AS94_03425 | phosphopantetheine adenylyltransferase              | -0.611 | 0.001 | 0.002 |
| AS94_03505 | inositol monophosphatase                            | -0.780 | 0.000 | 0.000 |
| AS94_03510 | hypothetical protein                                | -0.862 | 0.000 | 0.000 |
| AS94_03515 | manganese transporter                               | -0.496 | 0.000 | 0.000 |
| AS94_03585 | peptide deformylase                                 | -0.322 | 0.013 | 0.029 |
| AS94_03590 | hypothetical protein                                | -0.339 | 0.020 | 0.044 |
| AS94_03635 | SAM-dependent methyltransferase                     | -0.999 | 0.000 | 0.000 |
| AS94_03650 | thiamine ABC transporter permease                   | -0.785 | 0.000 | 0.001 |
| AS94_03655 | ABC transporter ATP-binding protein                 | -0.735 | 0.000 | 0.000 |
| AS94_03660 | cobalt ABC transporter permease                     | -1.253 | 0.000 | 0.000 |
| AS94_03735 | quinol oxidase subunit 2                            | -0.799 | 0.000 | 0.000 |

|            |                                                                         |        |       |       |
|------------|-------------------------------------------------------------------------|--------|-------|-------|
| AS94_03740 | quinol oxidase subunit 1                                                | -1.679 | 0.000 | 0.000 |
| AS94_03745 | cytochrome O ubiquinol oxidase                                          | -2.104 | 0.000 | 0.000 |
| AS94_03750 | quinol oxidase subunit 4                                                | -2.221 | 0.000 | 0.000 |
| AS94_03760 | hypothetical protein                                                    | -0.488 | 0.000 | 0.001 |
| AS94_03765 | hypothetical protein                                                    | -0.496 | 0.002 | 0.006 |
| AS94_03775 | mannosyl-glycoprotein endo-beta-N-acetylglucosamidase                   | -0.465 | 0.000 | 0.000 |
| AS94_03780 | MarR family transcriptional regulator                                   | -0.851 | 0.001 | 0.003 |
| AS94_03795 | glutamyl endopeptidase                                                  | -1.963 | 0.000 | 0.000 |
| AS94_03800 | cysteine protease                                                       | -1.563 | 0.000 | 0.000 |
| AS94_03810 | dihydroxynaphthoic acid synthetase                                      | -1.479 | 0.000 | 0.000 |
| AS94_03815 | 2-succinyl-6-hydroxy-2_4-cyclohexadiene-1-carboxylate synthase          | -1.194 | 0.000 | 0.000 |
| AS94_03820 | 2-succinyl-5-enolpyruvyl-6-hydroxy-3-cyclohexene-1-carboxylate synthase | -0.691 | 0.000 | 0.000 |
| AS94_03835 | acetyltransferase                                                       | -0.783 | 0.000 | 0.000 |
| AS94_03870 | bacteriocin ABC transporter ATP-binding protein                         | -1.139 | 0.000 | 0.000 |
| AS94_03880 | bacteriocin-associated integral membrane protein                        | -0.742 | 0.000 | 0.001 |
| AS94_03900 | IDEAL domain protein                                                    | -1.069 | 0.000 | 0.000 |
| AS94_03925 | ATP synthase                                                            | -0.550 | 0.000 | 0.000 |
| AS94_03940 | peptide chain release factor 1                                          | -0.332 | 0.002 | 0.006 |
| AS94_03985 | enoyl-ACP reductase                                                     | -0.356 | 0.002 | 0.005 |
| AS94_03995 | magnesium transporter MgtE                                              | -0.459 | 0.001 | 0.003 |
| AS94_04005 | inorganic polyphosphate/ATP-NAD kinase                                  | -0.707 | 0.000 | 0.000 |
| AS94_04010 | GTP pyrophosphokinase                                                   | -0.940 | 0.000 | 0.000 |
| AS94_04045 | competence negative regulator MecA                                      | -0.782 | 0.000 | 0.000 |
| AS94_04130 | MAP domain protein                                                      | -0.687 | 0.000 | 0.000 |
| AS94_04155 | DNA methyltransferase                                                   | -0.387 | 0.002 | 0.004 |
| AS94_04175 | hypothetical protein                                                    | -0.821 | 0.000 | 0.000 |
| AS94_04180 | ATP-dependent DNA helicase subunit A                                    | -0.776 | 0.000 | 0.000 |
| AS94_04185 | ATP-dependent DNA helicase subunit B                                    | -0.820 | 0.000 | 0.000 |
| AS94_04215 | glucose-6-phosphate isomerase                                           | -0.359 | 0.004 | 0.009 |

|            |                                                |        |       |       |
|------------|------------------------------------------------|--------|-------|-------|
| AS94_04230 | glycerophosphoryl diester<br>phosphodiesterase | -0.461 | 0.006 | 0.014 |
| AS94_04245 | NADH-dependent flavin oxidoreductase           | -0.989 | 0.000 | 0.000 |
| AS94_04285 | cation:proton antiporter                       | -0.918 | 0.000 | 0.000 |
| AS94_04290 | cation:proton antiporter                       | -2.248 | 0.000 | 0.000 |
| AS94_04295 | cation:proton antiporter                       | -1.343 | 0.000 | 0.000 |
| AS94_04300 | hypothetical protein                           | -1.642 | 0.000 | 0.000 |
| AS94_04305 | thioesterase                                   | -0.828 | 0.000 | 0.000 |
| AS94_04310 | sodium:proton antiporter                       | -0.666 | 0.000 | 0.001 |
| AS94_04325 | hypothetical protein                           | -0.530 | 0.000 | 0.001 |
| AS94_04345 | nitrogen-fixing protein NifU                   | -0.444 | 0.007 | 0.017 |
| AS94_04375 | 2-ketogluconate reductase                      | -0.674 | 0.000 | 0.000 |
| AS94_04420 | nitronate monooxygenase                        | -0.347 | 0.011 | 0.025 |
| AS94_04505 | arsenate reductase                             | -0.880 | 0.000 | 0.000 |
| AS94_04510 | thioredoxin                                    | -0.428 | 0.001 | 0.003 |
| AS94_04560 | membrane protein                               | -2.984 | 0.000 | 0.000 |
| AS94_04580 | cold-shock protein                             | -0.527 | 0.000 | 0.000 |
| AS94_04585 | thermonuclease                                 | -1.211 | 0.000 | 0.000 |
| AS94_04630 | enterotoxin I                                  | -0.795 | 0.000 | 0.000 |
| AS94_04645 | hypothetical protein                           | -0.548 | 0.000 | 0.000 |
| AS94_04660 | transposase                                    | -0.890 | 0.000 | 0.000 |
| AS94_04665 | transposase                                    | -0.806 | 0.001 | 0.002 |
| AS94_04695 | GTP cyclohydrolase                             | -0.505 | 0.000 | 0.000 |
| AS94_04700 | deacetylase                                    | -0.546 | 0.000 | 0.000 |
| AS94_04705 | hypothetical protein                           | -0.491 | 0.001 | 0.002 |
| AS94_04710 | glucosamine-6-phosphate deaminase              | -0.606 | 0.000 | 0.001 |
| AS94_04720 | 6-phospho 3-hexuloisomerase                    | -0.395 | 0.001 | 0.004 |
| AS94_04760 | pyridoxal kinase                               | -0.711 | 0.000 | 0.000 |
| AS94_04775 | membrane protein                               | -0.527 | 0.003 | 0.009 |
| AS94_04805 | lipoate-protein ligase A                       | -0.285 | 0.009 | 0.021 |
| AS94_04830 | dihydrolipoamide dehydrogenase                 | -0.456 | 0.008 | 0.018 |
| AS94_04890 | acetaldehyde reductase                         | -0.664 | 0.000 | 0.000 |
| AS94_04970 | cysteine synthase                              | -0.317 | 0.005 | 0.012 |
| AS94_04975 | heat shock protein Hsp33                       | -0.765 | 0.000 | 0.000 |

|            |                                                        |        |       |       |
|------------|--------------------------------------------------------|--------|-------|-------|
| AS94_04995 | hypothetical protein                                   | -0.507 | 0.000 | 0.000 |
| AS94_05000 | cell division protein DivIC                            | -0.555 | 0.003 | 0.007 |
| AS94_05010 | nucleotide pyrophosphohydrolase                        | -0.789 | 0.000 | 0.000 |
| AS94_05035 | ribose-phosphate pyrophosphokinase                     | -0.428 | 0.000 | 0.000 |
| AS94_05085 | methionyl-tRNA synthetase                              | -0.471 | 0.000 | 0.000 |
| AS94_05105 | DNA replication protein YabA                           | -0.852 | 0.000 | 0.000 |
| AS94_05110 | signal peptidase II                                    | -0.417 | 0.001 | 0.003 |
| AS94_05120 | hypothetical protein                                   | -0.742 | 0.000 | 0.000 |
| AS94_05125 | thymidylate kinase                                     | -0.973 | 0.000 | 0.000 |
| AS94_05130 | lysine decarboxylase                                   | -0.729 | 0.000 | 0.000 |
| AS94_05155 | hypothetical protein                                   | -0.915 | 0.000 | 0.000 |
| AS94_05290 | integrase                                              | -0.353 | 0.021 | 0.045 |
| AS94_05410 | transposase                                            | -2.258 | 0.000 | 0.000 |
| AS94_05425 | hypothetical protein                                   | -0.577 | 0.009 | 0.021 |
| AS94_05440 | NA                                                     | -0.566 | 0.008 | 0.018 |
| AS94_05445 | chromosome partitioning protein ParA                   | -0.550 | 0.000 | 0.000 |
| AS94_05450 | multidrug MFS transporter                              | -0.577 | 0.000 | 0.000 |
| AS94_05500 | iron citrate ABC transporter substrate-binding protein | -1.250 | 0.000 | 0.000 |
| AS94_05515 | macrolide MFS transporter                              | -0.546 | 0.018 | 0.039 |
| AS94_05555 | alcohol dehydrogenase                                  | -0.802 | 0.000 | 0.000 |
| AS94_05560 | alcohol dehydrogenase                                  | -0.805 | 0.000 | 0.000 |
| AS94_05570 | 6-phospho-beta-galactosidase                           | -2.188 | 0.000 | 0.000 |
| AS94_05575 | PTS lactose transporter subunit IIBC                   | -1.592 | 0.000 | 0.000 |
| AS94_05580 | PTS lactose transporter subunit IIA                    | -1.933 | 0.000 | 0.000 |
| AS94_05585 | tagatose-bisphosphate aldolase                         | -1.762 | 0.000 | 0.000 |
| AS94_05590 | tagatose-6-phosphate kinase                            | -1.519 | 0.000 | 0.000 |
| AS94_05595 | galactose-6-phosphate isomerase                        | -1.210 | 0.000 | 0.000 |
| AS94_05600 | galactose-6-phosphate isomerase                        | -1.840 | 0.000 | 0.000 |
| AS94_05605 | DeoR family transcriptional regulator                  | -0.556 | 0.002 | 0.004 |
| AS94_05615 | 2_5-diketo-D-gluconic acid reductase                   | -0.966 | 0.000 | 0.000 |
| AS94_05620 | MerR family transcriptional regulator                  | -0.950 | 0.006 | 0.014 |
| AS94_05655 | alpha-acetolactate decarboxylase                       | -2.048 | 0.000 | 0.000 |
| AS94_05660 | acetolactate synthase                                  | -2.238 | 0.000 | 0.000 |

|            |                                                              |        |       |       |
|------------|--------------------------------------------------------------|--------|-------|-------|
| AS94_05705 | cobalt ABC transporter ATP-binding protein                   | -0.542 | 0.001 | 0.004 |
| AS94_05870 | GNAT family acetyltransferase                                | -0.834 | 0.000 | 0.000 |
| AS94_05880 | malonate transporter                                         | -0.922 | 0.000 | 0.000 |
| AS94_05890 | membrane protein                                             | -0.586 | 0.000 | 0.000 |
| AS94_05920 | MarR family transcriptional regulator                        | -0.607 | 0.001 | 0.002 |
| AS94_05930 | molybdenum cofactor biosynthesis protein A                   | -0.841 | 0.000 | 0.000 |
| AS94_05935 | molybdopterin-guanine dinucleotide<br>biosynthesis protein A | -0.839 | 0.000 | 0.000 |
| AS94_05945 | molybdopterin synthase subunit 2                             | -1.042 | 0.000 | 0.000 |
| AS94_05950 | molybdopterin-guanine dinucleotide<br>biosynthesis protein B | -0.747 | 0.000 | 0.001 |
| AS94_05955 | molybdopterin molybdenumtransferase                          | -1.877 | 0.000 | 0.000 |
| AS94_05960 | molybdenum cofactor biosynthesis protein C                   | -1.289 | 0.000 | 0.000 |
| AS94_05965 | molybdenum cofactor biosynthesis protein B                   | -1.775 | 0.000 | 0.000 |
| AS94_05970 | molybdopterin biosynthesis protein MoeB                      | -1.200 | 0.000 | 0.000 |
| AS94_05975 | molybdenum ABC transporter ATP-binding<br>protein            | -1.476 | 0.000 | 0.000 |
| AS94_05980 | molybdenum ABC transporter permease                          | -1.250 | 0.000 | 0.000 |
| AS94_05985 | molybdenum ABC transporter substrate-<br>binding protein     | -0.388 | 0.015 | 0.034 |
| AS94_05990 | formate dehydrogenase subunit D                              | -0.884 | 0.000 | 0.000 |
| AS94_06010 | ferrichrome ABC transporter substrate-<br>binding protein    | -0.714 | 0.000 | 0.000 |
| AS94_06015 | acyl-CoA dehydrogenase                                       | -0.473 | 0.003 | 0.007 |
| AS94_06020 | urea transporter                                             | -1.519 | 0.000 | 0.000 |
| AS94_06025 | urease subunit gamma                                         | -1.313 | 0.018 | 0.039 |
| AS94_06030 | urease subunit beta                                          | -1.604 | 0.001 | 0.001 |
| AS94_06035 | urease subunit alpha                                         | -1.104 | 0.000 | 0.000 |
| AS94_06040 | urease accessory protein UreE                                | -0.692 | 0.022 | 0.047 |
| AS94_06045 | urease accessory protein UreF                                | -1.080 | 0.000 | 0.000 |
| AS94_06050 | urease accessory protein UreG                                | -1.076 | 0.000 | 0.000 |
| AS94_06055 | urease accessory protein UreD                                | -1.468 | 0.000 | 0.000 |
| AS94_06060 | MarR family transcriptional regulator                        | -0.752 | 0.000 | 0.000 |
| AS94_06065 | hypothetical protein                                         | -0.700 | 0.000 | 0.000 |



|            |                                              |        |       |       |
|------------|----------------------------------------------|--------|-------|-------|
| AS94_06070 | transcriptional regulator                    | -0.654 | 0.020 | 0.042 |
| AS94_06100 | hypothetical protein                         | -1.172 | 0.000 | 0.000 |
| AS94_06110 | 2-hydroxyacid dehydrogenase                  | -1.415 | 0.000 | 0.000 |
| AS94_06115 | hypothetical protein                         | -0.777 | 0.000 | 0.000 |
| AS94_06130 | hypothetical protein                         | -1.438 | 0.000 | 0.000 |
| AS94_06135 | oxidoreductase                               | -0.751 | 0.000 | 0.000 |
| AS94_06155 | DeoR family transcriptional regulator        | -0.848 | 0.000 | 0.000 |
| AS94_06190 | membrane protein                             | -1.640 | 0.015 | 0.032 |
| AS94_06195 | HAD family hydrolase                         | -0.655 | 0.002 | 0.005 |
| AS94_06210 | PTS alpha-glucoside transporter subunit IIBC | -2.416 | 0.000 | 0.000 |
| AS94_06215 | RpiR family transcriptional regulator        | -1.314 | 0.000 | 0.000 |
| AS94_06225 | sodium:proton antiporter                     | -0.555 | 0.000 | 0.001 |
| AS94_06235 | oxidoreductase                               | -0.582 | 0.000 | 0.000 |
| AS94_06265 | lysostaphin resistance protein A             | -0.943 | 0.000 | 0.000 |
| AS94_06270 | ribose 5-phosphate isomerase                 | -1.125 | 0.000 | 0.000 |
| AS94_06275 | molybdenum cofactor biosynthesis protein     | -0.831 | 0.000 | 0.000 |
| AS94_06280 | aldose 1-epimerase                           | -0.382 | 0.015 | 0.033 |
| AS94_06285 | membrane protein                             | -0.525 | 0.018 | 0.040 |
| AS94_06305 | 3-methyladenine DNA glycosylase              | -1.077 | 0.000 | 0.000 |
| AS94_06315 | isopentenyl pyrophosphate isomerase          | -0.522 | 0.000 | 0.000 |
| AS94_06380 | hemin ABC transporter ATP-binding protein    | -2.303 | 0.000 | 0.000 |
| AS94_06385 | hemin ABC transporter permease               | -2.441 | 0.000 | 0.000 |
| AS94_06390 | heme transporter CcmC                        | -0.871 | 0.001 | 0.003 |
| AS94_06395 | sensor histidine kinase                      | -1.345 | 0.000 | 0.000 |
| AS94_06420 | antibiotic ABC transporter permease          | -1.124 | 0.000 | 0.001 |
| AS94_06445 | acetyltransferase                            | -0.746 | 0.003 | 0.007 |
| AS94_06460 | GNAT family acetyltransferase                | -1.040 | 0.000 | 0.000 |
| AS94_06465 | ferredoxin--NADP reductase                   | -1.362 | 0.000 | 0.000 |
| AS94_06490 | PTS sucrose transporter subunit IIBC         | -2.418 | 0.000 | 0.000 |
| AS94_06550 | LuxR family transcriptional regulator        | -0.798 | 0.000 | 0.000 |
| AS94_06555 | sensor histidine kinase                      | -0.531 | 0.000 | 0.000 |
| AS94_06560 | nreA protein                                 | -0.653 | 0.000 | 0.000 |
| AS94_06565 | nitrate reductase subunit gamma              | -0.839 | 0.000 | 0.000 |

|            |                                                           |        |       |       |
|------------|-----------------------------------------------------------|--------|-------|-------|
| AS94_06570 | nitrate reductase sununit delta                           | -1.421 | 0.000 | 0.000 |
| AS94_06575 | nitrate reductase                                         | -0.926 | 0.000 | 0.000 |
| AS94_06580 | nitrate reductase                                         | -0.997 | 0.000 | 0.000 |
| AS94_06585 | uroporphyrinogen III methyltransferase                    | -1.445 | 0.000 | 0.000 |
| AS94_06590 | nitrite reductase NAD(P)H small subunit                   | -1.350 | 0.000 | 0.000 |
| AS94_06595 | nitrite reductase                                         | -1.209 | 0.000 | 0.000 |
| AS94_06600 | cobalamin biosynthesis protein CbiX                       | -0.901 | 0.000 | 0.000 |
| AS94_06605 | N-acetyltransferase                                       | -0.495 | 0.010 | 0.023 |
| AS94_06625 | zinc ABC transporter substrate-binding protein            | -0.361 | 0.021 | 0.045 |
| AS94_06630 | protein-disulfide isomerase                               | -0.496 | 0.011 | 0.025 |
| AS94_06665 | hypothetical protein                                      | -1.387 | 0.000 | 0.000 |
| AS94_06745 | hypothetical protein                                      | -1.690 | 0.000 | 0.000 |
| AS94_06765 | bicyclomycin transporter TcaB                             | -0.481 | 0.000 | 0.001 |
| AS94_06775 | hypothetical protein                                      | -0.616 | 0.000 | 0.000 |
| AS94_06790 | sodium:proton antiporter                                  | -0.398 | 0.003 | 0.008 |
| AS94_06795 | amino acid permease                                       | -1.036 | 0.000 | 0.000 |
| AS94_06805 | epimerase                                                 | -0.751 | 0.000 | 0.000 |
| AS94_06810 | 2-dehydropantoate 2-reductase                             | -1.571 | 0.000 | 0.000 |
| AS94_06815 | quinolone resistance protein NorB                         | -1.012 | 0.000 | 0.000 |
| AS94_06820 | amino acid ABC transporter permease                       | -1.689 | 0.000 | 0.000 |
| AS94_06825 | glycine/betaine ABC transporter substrate-binding protein | -1.528 | 0.000 | 0.000 |
| AS94_06830 | choline ABC transporter permease                          | -0.835 | 0.000 | 0.000 |
| AS94_06835 | glycine/betaine ABC transporter ATP-binding protein       | -0.801 | 0.000 | 0.000 |
| AS94_06840 | hypothetical protein                                      | -0.705 | 0.000 | 0.000 |
| AS94_06845 | amino acid:proton symporter                               | -0.948 | 0.000 | 0.000 |
| AS94_06860 | membrane protein                                          | -0.989 | 0.000 | 0.000 |
| AS94_06870 | peptidase M28                                             | -1.211 | 0.000 | 0.000 |
| AS94_06875 | hypothetical protein                                      | -0.858 | 0.000 | 0.000 |
| AS94_06890 | antibiotic MFS transporter                                | -0.510 | 0.021 | 0.045 |
| AS94_06955 | hypothetical protein                                      | -0.644 | 0.023 | 0.049 |
| AS94_06985 | hypothetical protein                                      | -1.486 | 0.000 | 0.000 |

|            |                                                         |        |       |       |
|------------|---------------------------------------------------------|--------|-------|-------|
| AS94_06990 | hypothetical protein                                    | -1.159 | 0.000 | 0.000 |
| AS94_06995 | hypothetical protein                                    | -1.505 | 0.000 | 0.000 |
| AS94_07000 | hypothetical protein                                    | -0.845 | 0.000 | 0.000 |
| AS94_07010 | hypothetical protein                                    | -0.764 | 0.000 | 0.000 |
| AS94_07040 | hypothetical protein                                    | -0.820 | 0.001 | 0.003 |
| AS94_07050 | UTP--glucose-1-phosphate<br>uridylyltransferase         | -0.790 | 0.000 | 0.000 |
| AS94_07055 | fibronectin-binding protein A                           | -0.561 | 0.000 | 0.001 |
| AS94_07065 | gluconate permease                                      | -1.153 | 0.000 | 0.000 |
| AS94_07070 | gluconokinase                                           | -0.317 | 0.005 | 0.012 |
| AS94_07080 | MerR family transcriptional regulator                   | -1.302 | 0.000 | 0.000 |
| AS94_07120 | fructose-1_6-bisphosphatase                             | -0.619 | 0.000 | 0.000 |
| AS94_07125 | membrane protein                                        | -0.347 | 0.011 | 0.025 |
| AS94_07130 | carboxylesterase                                        | -1.161 | 0.000 | 0.000 |
| AS94_07135 | glyoxalase                                              | -0.723 | 0.000 | 0.001 |
| AS94_07140 | MarR family transcriptional regulator                   | -1.147 | 0.000 | 0.000 |
| AS94_07145 | acetyltransferase                                       | -0.394 | 0.024 | 0.050 |
| AS94_07150 | glyoxalase                                              | -0.546 | 0.001 | 0.002 |
| AS94_07155 | NAD(P)H nitroreductase                                  | -0.788 | 0.000 | 0.000 |
| AS94_07165 | HAD family hydrolase                                    | -0.712 | 0.000 | 0.001 |
| AS94_07180 | sortase A                                               | -0.349 | 0.013 | 0.029 |
| AS94_07215 | esterase                                                | -1.431 | 0.000 | 0.000 |
| AS94_07225 | acyl-CoA thioester hydrolase                            | -1.027 | 0.000 | 0.000 |
| AS94_07230 | PTS glucose transporter subunit IIABC                   | -1.206 | 0.000 | 0.000 |
| AS94_07235 | pyruvate oxidase                                        | -1.038 | 0.000 | 0.000 |
| AS94_07240 | holin                                                   | -0.753 | 0.000 | 0.000 |
| AS94_07245 | holin                                                   | -2.964 | 0.000 | 0.000 |
| AS94_07250 | LysR family transcriptional regulator                   | -0.730 | 0.000 | 0.001 |
| AS94_07255 | hypothetical protein                                    | -0.768 | 0.020 | 0.043 |
| AS94_07265 | hydroxymethylglutaryl-CoA reductase                     | -0.320 | 0.013 | 0.029 |
| AS94_07275 | methylated DNA-protein cysteine S-<br>methyltransferase | -0.863 | 0.000 | 0.000 |
| AS94_07395 | TetR family transcriptional regulator                   | -0.849 | 0.000 | 0.000 |
| AS94_07440 | hydrolase                                               | -0.398 | 0.001 | 0.003 |

|            |                                                            |        |       |       |
|------------|------------------------------------------------------------|--------|-------|-------|
| AS94_07475 | fructosamine-3-kinase                                      | -0.860 | 0.000 | 0.000 |
| AS94_07510 | aspartate decarboxylase                                    | -0.460 | 0.004 | 0.011 |
| AS94_07515 | pantoate--beta-alanine ligase                              | -0.400 | 0.002 | 0.006 |
| AS94_07520 | 3-methyl-2-oxobutanoate<br>hydroxymethyltransferase        | -0.432 | 0.006 | 0.015 |
| AS94_07530 | alpha-acetolactate decarboxylase                           | -0.857 | 0.000 | 0.000 |
| AS94_07560 | malate:quinone oxidoreductase                              | -0.522 | 0.000 | 0.000 |
| AS94_07570 | acyl--CoA ligase                                           | -0.782 | 0.000 | 0.000 |
| AS94_07580 | hypothetical protein                                       | -0.899 | 0.010 | 0.023 |
| AS94_07590 | betaine-aldehyde dehydrogenase                             | -0.668 | 0.000 | 0.000 |
| AS94_07595 | hypothetical protein                                       | -0.542 | 0.001 | 0.003 |
| AS94_07600 | choline transporter BetT                                   | -0.655 | 0.000 | 0.000 |
| AS94_07605 | ribonucleoside-triphosphate reductase<br>activatingprotein | -0.894 | 0.000 | 0.000 |
| AS94_07620 | precorrin-2 dehydrogenase                                  | -0.828 | 0.000 | 0.000 |
| AS94_07625 | sulfite reductase subunit alpha                            | -0.734 | 0.000 | 0.000 |
| AS94_07635 | peptide ABC transporter permease                           | -0.667 | 0.000 | 0.000 |
| AS94_07675 | tributylin esterase                                        | -0.758 | 0.000 | 0.000 |
| AS94_07685 | hypothetical protein                                       | -0.966 | 0.001 | 0.003 |
| AS94_07690 | type I restriction endonuclease subunit S                  | -0.853 | 0.000 | 0.000 |
| AS94_07700 | RNA helicase                                               | -0.913 | 0.000 | 0.000 |
| AS94_07710 | hypothetical protein                                       | -0.729 | 0.000 | 0.000 |
| AS94_07715 | hypothetical protein                                       | -1.049 | 0.000 | 0.000 |
| AS94_07720 | transposase                                                | -0.737 | 0.000 | 0.000 |
| AS94_07800 | Vitamin B12 ABC transporter substrate-<br>binding protein  | -0.516 | 0.003 | 0.007 |
| AS94_07810 | HAD family hydrolase                                       | -0.742 | 0.001 | 0.002 |
| AS94_07815 | alpha/beta hydrolase                                       | -1.002 | 0.000 | 0.000 |
| AS94_07820 | hypothetical protein                                       | -1.548 | 0.000 | 0.000 |
| AS94_07840 | membrane protein                                           | -0.452 | 0.022 | 0.047 |
| AS94_07895 | sodium:proton antiporter                                   | -0.309 | 0.012 | 0.027 |
| AS94_07925 | N-acetylmannosaminyltransferase                            | -0.587 | 0.001 | 0.002 |
| AS94_07930 | teichoic acid ABC transporter ATP-binding<br>protein       | -0.565 | 0.000 | 0.000 |

|            |                                                    |        |       |       |
|------------|----------------------------------------------------|--------|-------|-------|
| AS94_07965 | nucleoside permease                                | -0.908 | 0.000 | 0.000 |
| AS94_07975 | iron-dicitrate ABC transporter ATP-binding protein | -0.977 | 0.000 | 0.000 |
| AS94_07980 | ferrichrome ABC transporter permease               | -0.894 | 0.000 | 0.000 |
| AS94_07985 | iron ABC transporter permease                      | -0.956 | 0.000 | 0.000 |
| AS94_07995 | dihydroxyacetone kinase subunit L                  | -0.536 | 0.000 | 0.001 |
| AS94_08000 | PTS mannose transporter subunit IIA                | -1.151 | 0.000 | 0.000 |
| AS94_08005 | hypothetical protein                               | -0.573 | 0.000 | 0.000 |
| AS94_08010 | membrane protein                                   | -0.509 | 0.000 | 0.000 |
| AS94_08025 | acetyltransferase                                  | -0.890 | 0.000 | 0.000 |
| AS94_08030 | 3-beta hydroxysteroid dehydrogenase                | -0.508 | 0.001 | 0.002 |
| AS94_08050 | bacitracin ABC transporter permease                | -0.764 | 0.000 | 0.000 |
| AS94_08065 | peptidase M23B                                     | -0.580 | 0.000 | 0.000 |
| AS94_08070 | inhibitor of apoptosis-promoting Bax1              | -0.631 | 0.000 | 0.000 |
| AS94_08075 | AraC family transcriptional regulator              | -0.966 | 0.000 | 0.000 |
| AS94_08080 | MarR family transcriptional regulator              | -2.695 | 0.000 | 0.000 |
| AS94_08095 | hypothetical protein                               | -0.547 | 0.000 | 0.000 |
| AS94_08100 | LysR family transcriptional regulator              | -0.561 | 0.000 | 0.000 |
| AS94_08105 | sugar MFS transporter                              | -0.643 | 0.000 | 0.000 |
| AS94_08170 | MarR family transcriptional regulator              | -0.281 | 0.005 | 0.013 |
| AS94_08195 | deoxyribodipyrimidine photo-lyase                  | -0.334 | 0.003 | 0.007 |
| AS94_08220 | hypothetical protein                               | -0.999 | 0.000 | 0.000 |
| AS94_08225 | YbaK/EbsC protein                                  | -1.240 | 0.000 | 0.000 |
| AS94_08240 | PTS fructose transporter subunit IIC               | -0.450 | 0.002 | 0.005 |
| AS94_08300 | 7-cyano-7-deazaguanine synthase                    | -0.447 | 0.014 | 0.030 |
| AS94_08335 | heme ABC transporter ATP-binding protein           | -0.778 | 0.000 | 0.000 |
| AS94_08340 | ATP-dependent DNA helicase RecQ                    | -1.288 | 0.000 | 0.000 |
| AS94_08370 | lipid kinase                                       | -0.758 | 0.000 | 0.000 |
| AS94_08390 | ribonucleotide reductase stimulatory protein       | -1.517 | 0.000 | 0.000 |
| AS94_08395 | ribonucleotide-diphosphate reductase subunit alpha | -1.064 | 0.000 | 0.000 |
| AS94_08400 | ribonucleotide-diphosphate reductase subunit beta  | -0.271 | 0.012 | 0.028 |
| AS94_08405 | iron ABC transporter permease                      | -1.355 | 0.000 | 0.000 |

|            |                                                   |        |       |       |
|------------|---------------------------------------------------|--------|-------|-------|
| AS94_08410 | iron ABC transporter permease                     | -1.251 | 0.001 | 0.003 |
| AS94_08485 | hypothetical protein                              | -1.285 | 0.000 | 0.000 |
| AS94_08530 | excinuclease ABC subunit B                        | -0.839 | 0.000 | 0.000 |
| AS94_08565 | hypothetical protein                              | -0.585 | 0.002 | 0.005 |
| AS94_08620 | glyceraldehyde-3-phosphate dehydrogenase          | -0.583 | 0.000 | 0.000 |
| AS94_08635 | phosphoglyceromutase                              | -0.415 | 0.001 | 0.003 |
| AS94_08640 | enolase                                           | -0.637 | 0.000 | 0.000 |
| AS94_08670 | hypothetical protein                              | -0.374 | 0.003 | 0.007 |
| AS94_08715 | virulence-associated protein E                    | -0.790 | 0.001 | 0.003 |
| AS94_08755 | pathogenicity island protein                      | -0.539 | 0.000 | 0.000 |
| AS94_08870 | alanine racemase                                  | -0.404 | 0.001 | 0.003 |
| AS94_08895 | potassium-transporting ATPase subunit C           | -1.320 | 0.000 | 0.000 |
| AS94_08900 | potassium-transporting ATPase subunit B           | -0.834 | 0.000 | 0.000 |
| AS94_08975 | thiamine-phosphate pyrophosphorylase              | -0.807 | 0.008 | 0.019 |
| AS94_08980 | hydroxyethylthiazole kinase                       | -0.824 | 0.020 | 0.043 |
| AS94_09000 | single-stranded DNA-binding protein               | -0.931 | 0.002 | 0.005 |
| AS94_09125 | aldehyde dehydrogenase                            | -0.489 | 0.000 | 0.000 |
| AS94_09130 | HxlR family transcriptional regulator             | -0.328 | 0.004 | 0.009 |
| AS94_09135 | UDP-N-acetylglucosamine 1-carboxyvinyltransferase | -0.362 | 0.001 | 0.003 |
| AS94_09140 | fructose-bisphosphate aldolase                    | -1.039 | 0.000 | 0.000 |
| AS94_09145 | hypothetical protein                              | -0.889 | 0.000 | 0.000 |
| AS94_09170 | hypothetical protein                              | -0.341 | 0.015 | 0.034 |
| AS94_09190 | membrane protein                                  | -1.295 | 0.000 | 0.000 |
| AS94_09195 | pyrimidine-nucleoside phosphorylase               | -1.117 | 0.000 | 0.000 |
| AS94_09200 | deoxyribose-phosphate aldolase                    | -0.527 | 0.000 | 0.000 |
| AS94_09210 | general stress protein                            | -1.297 | 0.000 | 0.000 |
| AS94_09235 | oxidoreductase                                    | -0.482 | 0.000 | 0.001 |
| AS94_09295 | FmtB protein                                      | -1.238 | 0.000 | 0.000 |
| AS94_09375 | MarR family transcriptional regulator             | -0.683 | 0.000 | 0.000 |
| AS94_09390 | iron ABC transporter substrate-binding protein    | -1.066 | 0.001 | 0.002 |
| AS94_09415 | siderophore biosynthesis protein SbnE             | -0.589 | 0.020 | 0.044 |
| AS94_09430 | diaminopimelate decarboxylase                     | -0.717 | 0.009 | 0.021 |

|            |                                                |        |       |       |
|------------|------------------------------------------------|--------|-------|-------|
| AS94_09435 | siderophore biosynthesis protein SbnI          | -0.971 | 0.000 | 0.001 |
| AS94_09455 | acetoin reductase                              | -1.887 | 0.000 | 0.000 |
| AS94_09485 | superoxide dismutase                           | -2.792 | 0.000 | 0.000 |
| AS94_09515 | phosphopentomutase                             | -0.973 | 0.000 | 0.000 |
| AS94_09545 | 2'_3'-cyclic nucleotide 2'-phosphodiesterase   | -1.224 | 0.000 | 0.000 |
| AS94_09640 | monooxygenase IsdI                             | -1.073 | 0.007 | 0.016 |
| AS94_09645 | hypothetical protein                           | -0.822 | 0.016 | 0.035 |
| AS94_09700 | 4'-phosphopantetheinyl transferase             | -0.669 | 0.000 | 0.000 |
| AS94_09705 | hypothetical protein                           | -0.977 | 0.000 | 0.000 |
| AS94_09735 | isochorismatase                                | -0.661 | 0.000 | 0.000 |
| AS94_09740 | pyruvate decarboxylase                         | -0.590 | 0.000 | 0.000 |
| AS94_09750 | PTS glucose transporter subunit IIBC           | -1.286 | 0.000 | 0.000 |
| AS94_09785 | ABC transporter ATP-binding protein            | -1.172 | 0.000 | 0.000 |
| AS94_09815 | azoreductase                                   | -0.923 | 0.000 | 0.000 |
| AS94_09825 | sugar ABC transporter ATP-binding protein      | -0.998 | 0.000 | 0.001 |
| AS94_09830 | ABC transporter substrate-binding protein      | -1.004 | 0.000 | 0.000 |
| AS94_09835 | arabinogalactan ABC transporter permease       | -0.991 | 0.000 | 0.000 |
| AS94_09840 | arabinogalactan ABC transporter permease       | -1.504 | 0.000 | 0.000 |
| AS94_09845 | oxidoreductase                                 | -1.963 | 0.000 | 0.000 |
| AS94_09850 | NADH-dependent dehydrogenase                   | -2.303 | 0.000 | 0.000 |
| AS94_09855 | xylose isomerase                               | -2.370 | 0.000 | 0.000 |
| AS94_09870 | AraC family transcriptional regulator          | -1.307 | 0.000 | 0.000 |
| AS94_09885 | formate acetyltransferase                      | -2.568 | 0.000 | 0.000 |
| AS94_09890 | pyruvate formate lyase-activating protein      | -2.617 | 0.000 | 0.000 |
| AS94_09895 | hypothetical protein                           | -1.059 | 0.004 | 0.010 |
| AS94_09900 | glycerophosphoryl diester<br>phosphodiesterase | -0.478 | 0.003 | 0.006 |
| AS94_09980 | nitric oxide dioxygenase                       | -0.419 | 0.004 | 0.011 |
| AS94_09990 | PTS glucose transporter subunit IIB            | -1.257 | 0.000 | 0.000 |
| AS94_10030 | iditol 2-dehydrogenase                         | -0.994 | 0.000 | 0.000 |
| AS94_10075 | cell wall biosynthesis protein ScdA            | -0.491 | 0.000 | 0.000 |
| AS94_10080 | sensor histidine kinase                        | -0.717 | 0.000 | 0.000 |
| AS94_10085 | LytR family transcriptional regulator          | -0.829 | 0.000 | 0.001 |
| AS94_10100 | GntR family transcriptional regulator          | -0.977 | 0.000 | 0.000 |

|            |                                                                  |        |       |       |
|------------|------------------------------------------------------------------|--------|-------|-------|
| AS94_10105 | phosphoenolpyruvate-dependent sugar PTS<br>family porter_ EIIA 1 | -2.224 | 0.000 | 0.000 |
| AS94_10110 | aryl-phospho-beta-D-glucosidase                                  | -2.039 | 0.000 | 0.000 |
| AS94_10115 | hypothetical protein                                             | -1.335 | 0.000 | 0.000 |
| AS94_10140 | LacI family transcriptional regulator                            | -1.483 | 0.000 | 0.000 |
| AS94_10155 | penicillin V acylase                                             | -0.848 | 0.000 | 0.000 |
| AS94_10160 | glycyl-glycine endopeptidase                                     | -0.675 | 0.000 | 0.000 |
| AS94_10255 | hypothetical protein                                             | -0.400 | 0.019 | 0.040 |
| AS94_10320 | formate/nitrite transporter                                      | -0.602 | 0.000 | 0.000 |
| AS94_10340 | peptide ABC transporter ATP-binding<br>protein                   | -0.437 | 0.001 | 0.002 |
| AS94_10355 | pseudouridine-5'-phosphate glycosidase                           | -0.616 | 0.002 | 0.005 |
| AS94_10365 | sialic acid transporter                                          | -0.743 | 0.000 | 0.000 |
| AS94_10370 | N-acetylneuraminate lyase                                        | -0.910 | 0.000 | 0.000 |
| AS94_10375 | N-acetylmannosamine kinase                                       | -0.500 | 0.000 | 0.000 |
| AS94_10380 | RpiR family transcriptional regulator                            | -0.540 | 0.000 | 0.000 |
| AS94_10385 | N-acetylmannosamine-6-phosphate 2-<br>epimerase                  | -0.813 | 0.000 | 0.000 |
| AS94_10400 | alpha/beta hydrolase                                             | -0.946 | 0.000 | 0.000 |
| AS94_10475 | glyoxalase                                                       | -0.553 | 0.010 | 0.022 |
| AS94_10480 | luciferase                                                       | -1.150 | 0.000 | 0.000 |
| AS94_10485 | FMN reductase                                                    | -0.957 | 0.000 | 0.000 |
| AS94_10490 | membrane protein                                                 | -1.031 | 0.000 | 0.000 |
| AS94_10665 | hypothetical protein                                             | -1.321 | 0.000 | 0.000 |
| AS94_10675 | phosphoglycerate mutase                                          | -0.416 | 0.020 | 0.044 |
| AS94_10700 | alkyl hydroperoxide reductase subunit C                          | -0.366 | 0.001 | 0.002 |
| AS94_10705 | NADPH-dependent oxidoreductase                                   | -0.712 | 0.000 | 0.000 |
| AS94_10730 | xanthine phosphoribosyltransferase                               | -1.523 | 0.000 | 0.000 |
| AS94_10735 | xanthine permease                                                | -1.247 | 0.000 | 0.000 |
| AS94_10740 | inosine 5'-monophosphate dehydrogenase                           | -1.206 | 0.000 | 0.000 |
| AS94_10745 | GMP synthase                                                     | -1.191 | 0.000 | 0.000 |
| AS94_10815 | membrane protein                                                 | -1.961 | 0.000 | 0.000 |
| AS94_10820 | 3-beta hydroxysteroid dehydrogenase                              | -1.140 | 0.000 | 0.000 |
| AS94_10890 | hypothetical protein                                             | -1.002 | 0.000 | 0.000 |



|            |                                              |        |       |       |
|------------|----------------------------------------------|--------|-------|-------|
| AS94_10895 | hypothetical protein                         | -1.503 | 0.002 | 0.005 |
| AS94_10940 | NADH dehydrogenase subunit 5                 | -0.926 | 0.000 | 0.000 |
| AS94_10945 | hypothetical protein                         | -0.629 | 0.000 | 0.000 |
| AS94_10965 | carboxylesterase                             | -0.800 | 0.000 | 0.000 |
| AS94_10970 | sodium-dependent transporter                 | -0.903 | 0.000 | 0.000 |
| AS94_11000 | N-acetylmuramoyl-L-alanine amidase           | -0.457 | 0.000 | 0.000 |
| AS94_11020 | hypothetical protein                         | -1.007 | 0.000 | 0.000 |
| AS94_11025 | hypothetical protein                         | -0.535 | 0.002 | 0.004 |
| AS94_11075 | DNA polymerase III subunit gamma/tau         | -0.370 | 0.002 | 0.004 |
| AS94_11080 | hypothetical protein                         | -0.499 | 0.013 | 0.029 |
| AS94_11085 | recombinase RecR                             | -0.384 | 0.012 | 0.026 |
| AS94_11090 | adhesin                                      | -1.330 | 0.000 | 0.000 |
| AS94_11095 | 2-oxoglutarate translocator                  | -0.947 | 0.000 | 0.000 |
| AS94_11100 | chloramphenicol-sensitive protein RarD       | -0.508 | 0.003 | 0.007 |
| AS94_11110 | nickel transporter NixA                      | -0.893 | 0.000 | 0.000 |
| AS94_11115 | N-acetyltransferase                          | -0.821 | 0.000 | 0.000 |
| AS94_11145 | cold-shock protein                           | -0.592 | 0.000 | 0.000 |
| AS94_11150 | Cro/C1 family transcriptional regulator      | -1.032 | 0.000 | 0.000 |
| AS94_11155 | hypothetical protein                         | -0.629 | 0.002 | 0.006 |
| AS94_11160 | hypothetical protein                         | -0.695 | 0.001 | 0.003 |
| AS94_11225 | carbohydrate kinase                          | -1.238 | 0.000 | 0.000 |
| AS94_11265 | 50S ribosomal protein L9                     | -0.666 | 0.000 | 0.000 |
| AS94_11270 | replicative DNA helicase                     | -1.089 | 0.000 | 0.000 |
| AS94_11305 | hypothetical protein                         | -0.388 | 0.000 | 0.001 |
| AS94_11400 | recombinase RecA                             | -0.828 | 0.000 | 0.000 |
| AS94_11465 | branched-chain amino acid aminotransferase   | -0.363 | 0.001 | 0.002 |
| AS94_11480 | molecular chaperone                          | -1.156 | 0.000 | 0.000 |
| AS94_11490 | N-acetyl-L-L-diaminopimelate deacetylase     | -0.456 | 0.003 | 0.008 |
| AS94_11495 | elongation factor Tu                         | -0.374 | 0.001 | 0.003 |
| AS94_11520 | DNA-directed RNA polymerase subunit<br>beta' | -0.472 | 0.000 | 0.000 |
| AS94_11525 | DNA-directed RNA polymerase subunit beta     | -0.271 | 0.015 | 0.033 |
| AS94_11600 | glutamyl-tRNA synthase                       | -0.585 | 0.000 | 0.000 |
| AS94_11660 | adhesin                                      | -2.529 | 0.000 | 0.000 |

|            |                                                                                                   |        |       |       |
|------------|---------------------------------------------------------------------------------------------------|--------|-------|-------|
| AS94_11670 | pyrrolidone-carboxylate peptidase                                                                 | -1.052 | 0.000 | 0.000 |
| AS94_11690 | polysaccharide deacetylase                                                                        | -1.007 | 0.002 | 0.006 |
| AS94_11695 | ATP phosphoribosyltransferase                                                                     | -2.797 | 0.000 | 0.000 |
| AS94_11700 | ATP phosphoribosyltransferase                                                                     | -2.726 | 0.000 | 0.000 |
| AS94_11705 | histidinol dehydrogenase                                                                          | -2.226 | 0.000 | 0.000 |
| AS94_11710 | histidinol-phosphate aminotransferase                                                             | -1.979 | 0.000 | 0.000 |
| AS94_11715 | imidazoleglycerol-phosphate dehydratase                                                           | -1.428 | 0.020 | 0.044 |
| AS94_11720 | imidazole glycerol phosphate synthase                                                             | -1.895 | 0.001 | 0.002 |
| AS94_11725 | 1-(5-phosphoribosyl)-5-[(5-phosphoribosylamino)methylideneamino]imidazole-4-carboxamide isomerase | -1.252 | 0.001 | 0.002 |
| AS94_11730 | imidazole glycerol phosphate synthase                                                             | -0.932 | 0.005 | 0.013 |
| AS94_11735 | phosphoribosyl-AMP cyclohydrolase                                                                 | -0.752 | 0.001 | 0.003 |
| AS94_11760 | N-glycosyltransferase                                                                             | -1.757 | 0.000 | 0.000 |
| AS94_11800 | hypothetical protein                                                                              | -0.383 | 0.005 | 0.012 |
| AS94_11830 | adhesin                                                                                           | -0.674 | 0.000 | 0.000 |
| AS94_11835 | preprotein translocase subunit SecY                                                               | -1.093 | 0.000 | 0.000 |
| AS94_11840 | Accessory Sec system protein Asp1                                                                 | -1.249 | 0.000 | 0.000 |
| AS94_11845 | accessory secretory protein Asp2                                                                  | -1.085 | 0.000 | 0.000 |
| AS94_11850 | Accessory Sec system protein Asp3                                                                 | -0.775 | 0.009 | 0.022 |
| AS94_11890 | mannose-6-phosphate isomerase                                                                     | -3.259 | 0.000 | 0.000 |
| AS94_11895 | PTS mannose transporter subunit IIABC                                                             | -2.737 | 0.000 | 0.000 |
| AS94_11905 | hypothetical protein                                                                              | -0.564 | 0.006 | 0.015 |
| AS94_11925 | arginine deiminase                                                                                | -1.290 | 0.000 | 0.000 |
| AS94_11930 | ornithine carbamoyltransferase                                                                    | -0.449 | 0.001 | 0.004 |
| AS94_11960 | Fur family transcriptional regulator                                                              | -0.644 | 0.000 | 0.000 |
| AS94_11980 | membrane protein                                                                                  | -0.296 | 0.023 | 0.049 |
| AS94_12005 | membrane protein                                                                                  | -0.661 | 0.000 | 0.000 |
| AS94_12405 | hypothetical protein                                                                              | -0.387 | 0.009 | 0.021 |
| AS94_12435 | methionine aminopeptidase                                                                         | -0.422 | 0.001 | 0.004 |
| AS94_12470 | ferritin                                                                                          | -0.897 | 0.000 | 0.000 |
| AS94_12565 | membrane protein                                                                                  | -0.648 | 0.000 | 0.000 |
| AS94_12570 | NAD synthetase                                                                                    | -0.443 | 0.002 | 0.005 |
| AS94_12585 | prephenate dehydratase                                                                            | -0.617 | 0.000 | 0.000 |

|            |                 |                                             |        |       |       |
|------------|-----------------|---------------------------------------------|--------|-------|-------|
| AS94_12605 |                 | pyrophosphatase                             | -0.864 | 0.000 | 0.000 |
| AS94_12610 |                 | aldehyde dehydrogenase                      | -0.845 | 0.000 | 0.000 |
| AS94_12670 |                 | hypothetical protein                        | -0.801 | 0.000 | 0.000 |
| AS94_12785 |                 | hypothetical protein                        | -1.746 | 0.000 | 0.000 |
| AS94_12815 |                 | peptidase M23                               | -0.945 | 0.000 | 0.000 |
| AS94_12865 |                 | nitroreductase                              | -0.400 | 0.002 | 0.006 |
| AS94_12875 | <i>hld</i>      | delta-hemolysin                             | -0.296 | 0.004 | 0.010 |
| AS94_12880 | <i>agrB</i>     | accessory gene regulator B                  | -0.784 | 0.000 | 0.000 |
| AS94_12890 | <i>agrC</i>     | histidine kinase                            | -0.536 | 0.000 | 0.000 |
| AS94_12895 | <i>agrA</i>     | histidine kinase                            | -0.901 | 0.000 | 0.000 |
| AS94_12900 |                 | fructokinase                                | -1.091 | 0.000 | 0.000 |
| AS94_12905 |                 | sucrose-6-phosphate hydrolase               | -0.423 | 0.000 | 0.000 |
| AS94_12930 |                 | redox-sensing transcriptional repressor Rex | -0.258 | 0.022 | 0.046 |
| AS94_12945 |                 | O-sialoglycoprotein endopeptidase           | -0.444 | 0.000 | 0.001 |
| AS94_13015 |                 | hypothetical protein                        | -3.340 | 0.017 | 0.036 |
| AS94_13445 |                 | protoporphyrinogen oxidase                  | -0.459 | 0.001 | 0.004 |
| AS94_13475 |                 | cell-cycle regulation protein HIT           | -1.246 | 0.000 | 0.000 |
| AS94_13480 |                 | hypothetical protein                        | -0.558 | 0.000 | 0.000 |
| AS94_13560 |                 | glucosamine-6-phosphate isomerase           | -0.322 | 0.002 | 0.005 |
| AS94_13585 |                 | membrane protein                            | -0.484 | 0.015 | 0.034 |
| AS94_12195 |                 | transcriptional regulator                   | -0.864 | 0.005 | 0.012 |
| AS94_12245 |                 | hypothetical protein                        | -1.619 | 0.014 | 0.030 |
| AS94_12265 | $\phi$ SA169    | hypothetical protein                        | -1.225 | 0.000 | 0.000 |
| AS94_12285 |                 | DNA replication protein DnaC                | -0.648 | 0.001 | 0.003 |
| AS94_12360 |                 | transcriptional regulator                   | -0.419 | 0.006 | 0.015 |
| AS94_13030 |                 | hypothetical protein                        | -1.393 | 0.000 | 0.000 |
| AS94_13035 |                 | enterotoxin                                 | -0.712 | 0.001 | 0.003 |
| AS94_13070 |                 | autolysin                                   | -0.873 | 0.000 | 0.000 |
| AS94_13075 |                 | holin                                       | -1.556 | 0.000 | 0.000 |
| AS94_13095 | mutual prophage | hypothetical protein                        | -0.651 | 0.002 | 0.006 |
| AS94_13100 |                 | minor structural protein                    | -0.542 | 0.001 | 0.003 |
| AS94_13110 |                 | peptidase                                   | -0.459 | 0.021 | 0.044 |
| AS94_13120 |                 | tail protein                                | -0.489 | 0.000 | 0.000 |
| AS94_13135 |                 | tail protein                                | -0.647 | 0.000 | 0.001 |

|            |                                      |        |       |       |
|------------|--------------------------------------|--------|-------|-------|
| AS94_13195 | transcriptional regulator            | -1.194 | 0.000 | 0.000 |
| AS94_13200 | helicase                             | -0.662 | 0.002 | 0.006 |
| AS94_13205 | hypothetical protein                 | -0.686 | 0.001 | 0.002 |
| AS94_13220 | hypothetical protein                 | -1.089 | 0.000 | 0.000 |
| AS94_13350 | hypothetical protein                 | -1.035 | 0.016 | 0.036 |
| AS94_13360 | hypothetical protein                 | -1.755 | 0.000 | 0.000 |
| AS94_13370 | hypothetical protein                 | -0.611 | 0.000 | 0.000 |
| AS94_13375 | XRE family transcriptional regulator | -0.882 | 0.000 | 0.001 |
| AS94_13390 | hypothetical protein                 | -0.551 | 0.000 | 0.000 |
