# Supplementary material for: Transcriptome Analyses of Prophage in Mediating Persistent Methicillin-Resistant Staphylococcus aureus Endovascular Infection
Source: MDPI journal article supplement (doi:10.3390/genes13091527), 2022-08-25
Supplement: s1 [file s1]

Table S11. Primers for qRT-PCR confirmation

| Gene           | Primer sequence (5'-3') |
|----------------|-------------------------|
| <i>fabH</i> _F | TCGCTGACGCTGGTATTCAG    |
| <i>fabH</i> _R | GCCCGTCCCTAAACGTTCTT    |
| <i>purA</i> _F | TATCGCGCGTTTTTCAGGTG    |
| <i>purA</i> _R | ACTCCGTTACCGATTACCGC    |
| <i>lacF</i> _F | GTTGCATTTGCAGGGGATGC    |
| <i>lacF</i> _R | CCAACAGGCTTGTTTGTGCT    |
| <i>treP</i> _F | TCAAGGGGCAGTTCAAAGCA    |
| <i>treP</i> _R | TTTTTGTGCAGCGGCTTGTT    |
