# Supplementary material for: Transcriptome Analyses of Prophage in Mediating Persistent Methicillin-Resistant Staphylococcus aureus Endovascular Infection
Source: MDPI journal article supplement (doi:10.3390/genes13091527), 2022-08-25
Supplement: s1 [file s1]

Table S10. DEGs down-regulated by both  $\phi$ SA169 and MRSA genetic backgrounds

| locus      | gene        | group           | product                              | 301-188:: $\phi$ SA169 vs. 301-188 |         |       | 300-169 vs. 301-188            |         |       | 300-169 vs. 301-188:: $\phi$ SA169 |         |       |
|------------|-------------|-----------------|--------------------------------------|------------------------------------|---------|-------|--------------------------------|---------|-------|------------------------------------|---------|-------|
|            |             |                 |                                      | log <sub>2</sub> (fold change)     | p value | p adj | log <sub>2</sub> (fold change) | p value | p adj | log <sub>2</sub> (fold change)     | p value | p adj |
| AS94_03800 |             |                 | cysteine protease                    | -0.816                             | 0.001   | 0.014 | -2.378                         | 0.000   | 0.000 | -1.563                             | 0.000   | 0.000 |
| AS94_05575 |             |                 | PTS lactose transporter subunit IIBC | -0.742                             | 0.000   | 0.000 | -2.334                         | 0.000   | 0.000 | -1.592                             | 0.000   | 0.000 |
| AS94_05580 | <i>lacF</i> |                 | PTS lactose transporter subunit IIA  | -1.109                             | 0.002   | 0.029 | -3.043                         | 0.000   | 0.000 | -1.933                             | 0.000   | 0.000 |
| AS94_05585 | <i>lacD</i> |                 | tagatose-bisphosphate aldolase       | -0.807                             | 0.000   | 0.000 | -2.569                         | 0.000   | 0.000 | -1.762                             | 0.000   | 0.000 |
| AS94_05590 | <i>lacC</i> |                 | tagatose-6-phosphate kinase          | -0.855                             | 0.000   | 0.000 | -2.374                         | 0.000   | 0.000 | -1.519                             | 0.000   | 0.000 |
| AS94_05595 | <i>lacB</i> | host genes      | galactose-6-phosphate isomerase      | -1.089                             | 0.000   | 0.000 | -2.300                         | 0.000   | 0.000 | -1.210                             | 0.000   | 0.000 |
| AS94_05600 | <i>lacA</i> |                 | galactose-6-phosphate isomerase      | -0.759                             | 0.001   | 0.011 | -2.599                         | 0.000   | 0.000 | -1.840                             | 0.000   | 0.000 |
| AS94_07070 | <i>gntK</i> |                 | gluconokinase                        | -0.387                             | 0.001   | 0.011 | -0.704                         | 0.000   | 0.000 | -0.317                             | 0.005   | 0.012 |
| AS94_09210 |             |                 | general stress protein               | -0.585                             | 0.000   | 0.002 | -1.882                         | 0.000   | 0.000 | -1.297                             | 0.000   | 0.000 |
| AS94_10365 |             |                 | sialic acid transporter              | -0.784                             | 0.000   | 0.000 | -1.527                         | 0.000   | 0.000 | -0.743                             | 0.000   | 0.000 |
| AS94_10370 |             |                 | N-acetylneuraminate lyase            | -0.838                             | 0.000   | 0.000 | -1.747                         | 0.000   | 0.000 | -0.910                             | 0.000   | 0.000 |
| AS94_10375 |             |                 | N-acetylmannosamine kinase           | -0.368                             | 0.003   | 0.047 | -0.868                         | 0.000   | 0.000 | -0.500                             | 0.000   | 0.000 |
| AS94_12875 | <i>hld</i>  |                 | delta-hemolysin                      | -0.429                             | 0.000   | 0.001 | -0.725                         | 0.000   | 0.000 | -0.296                             | 0.004   | 0.010 |
| AS94_13070 | <i>nanA</i> |                 | autolysin                            | -1.467                             | 0.000   | 0.000 | -2.341                         | 0.000   | 0.000 | -0.873                             | 0.000   | 0.000 |
| AS94_13075 |             |                 | holin                                | -1.693                             | 0.000   | 0.000 | -3.249                         | 0.000   | 0.000 | -1.556                             | 0.000   | 0.000 |
| AS94_13095 |             |                 | hypothetical protein                 | -1.697                             | 0.000   | 0.000 | -2.348                         | 0.000   | 0.000 | -0.651                             | 0.002   | 0.006 |
| AS94_13100 |             |                 | minor structural protein             | -1.525                             | 0.000   | 0.000 | -2.067                         | 0.000   | 0.000 | -0.542                             | 0.001   | 0.003 |
| AS94_13110 |             | mutual prophage | peptidase                            | -1.716                             | 0.000   | 0.000 | -2.176                         | 0.000   | 0.000 | -0.459                             | 0.021   | 0.044 |
| AS94_13120 |             |                 | tail protein                         | -1.623                             | 0.000   | 0.000 | -2.112                         | 0.000   | 0.000 | -0.489                             | 0.000   | 0.000 |
| AS94_13135 |             |                 | tail protein                         | -1.424                             | 0.000   | 0.000 | -2.071                         | 0.000   | 0.000 | -0.647                             | 0.000   | 0.001 |
| AS94_13195 |             |                 | transcriptional regulator            | -0.735                             | 0.000   | 0.000 | -1.929                         | 0.000   | 0.000 | -1.194                             | 0.000   | 0.000 |
| AS94_13200 |             |                 | helicase                             | -0.895                             | 0.000   | 0.000 | -1.557                         | 0.000   | 0.000 | -0.662                             | 0.002   | 0.006 |
| AS94_13205 |             |                 | hypothetical protein                 | -0.750                             | 0.000   | 0.002 | -1.435                         | 0.000   | 0.000 | -0.686                             | 0.001   | 0.002 |
