# Supplementary material for: Transcriptome Analyses of Prophage in Mediating Persistent Methicillin-Resistant Staphylococcus aureus Endovascular Infection
Source: MDPI journal article supplement (doi:10.3390/genes13091527), 2022-08-25
Supplement: s1 [file s1]

Table S3. Up-regulated DEGs in 300-169 vs. 301-188

| locus      | gene | group      | product                                                   | log <sub>2</sub> (fold change) | p value | p adj |
|------------|------|------------|-----------------------------------------------------------|--------------------------------|---------|-------|
| AS94_00015 |      |            | hypothetical protein                                      | 0.979                          | 0.000   | 0.000 |
| AS94_00025 |      |            | calcium-binding protein                                   | 1.265                          | 0.000   | 0.000 |
| AS94_00035 |      |            | 2-succinylbenzoate--CoA ligase                            | 0.382                          | 0.008   | 0.017 |
| AS94_00060 |      |            | phosphoenolpyruvate carboxykinase                         | 0.596                          | 0.000   | 0.000 |
| AS94_00145 |      |            | pyridine nucleotide-disulfide<br>oxidoreductase           | 0.504                          | 0.025   | 0.049 |
| AS94_00150 |      |            | diaminohydroxyphosphoribosylamino<br>pyrimidine deaminase | 1.209                          | 0.000   | 0.000 |
| AS94_00155 |      |            | riboflavin synthase subunit alpha                         | 0.838                          | 0.000   | 0.000 |
| AS94_00160 |      |            | GTP cyclohydrolase                                        | 0.831                          | 0.000   | 0.000 |
| AS94_00165 |      |            | 6_7-dimethyl-8-ribityllumazine<br>synthase                | 0.469                          | 0.016   | 0.034 |
| AS94_00170 |      |            | proline dehydrogenase                                     | 0.863                          | 0.000   | 0.000 |
| AS94_00175 |      |            | lysophospholipase                                         | 0.575                          | 0.000   | 0.000 |
| AS94_00180 |      |            | MarR family transcriptional regulator                     | 0.666                          | 0.000   | 0.000 |
| AS94_00185 |      | host genes | rRNA methyltransferase                                    | 0.497                          | 0.005   | 0.011 |
| AS94_00190 |      |            | hypothetical protein                                      | 0.382                          | 0.013   | 0.028 |
| AS94_00275 |      |            | hypothetical protein                                      | 1.099                          | 0.000   | 0.000 |
| AS94_00280 |      |            | tRNA-binding protein                                      | 1.274                          | 0.000   | 0.000 |
| AS94_00285 |      |            | cell division protein FtsK                                | 1.122                          | 0.000   | 0.000 |
| AS94_00290 |      |            | UDP-N-acetylmuramate--alanine ligase                      | 0.808                          | 0.000   | 0.000 |
| AS94_00295 |      |            | hypothetical protein                                      | 0.999                          | 0.000   | 0.000 |
| AS94_00300 |      |            | smooth muscle caldesmon                                   | 1.170                          | 0.000   | 0.000 |
| AS94_00325 |      |            | acetyl-CoA synthetase                                     | 0.516                          | 0.000   | 0.000 |
| AS94_00330 |      |            | formate--tetrahydrofolate ligase                          | 0.281                          | 0.017   | 0.036 |
| AS94_00350 |      |            | serine protease                                           | 1.256                          | 0.000   | 0.000 |
| AS94_00390 |      |            | 30S ribosomal protein S4                                  | 0.617                          | 0.000   | 0.000 |
| AS94_00410 |      |            | thiamine biosynthesis protein ThiI                        | 0.416                          | 0.014   | 0.030 |
| AS94_00430 |      |            | acetate kinase                                            | 0.460                          | 0.000   | 0.000 |
| AS94_00440 |      |            | alanine dehydrogenase                                     | 0.595                          | 0.000   | 0.000 |
| AS94_00530 |      |            | PhoP family transcriptional regulator                     | 0.349                          | 0.024   | 0.049 |

|            |                                                   |       |       |       |
|------------|---------------------------------------------------|-------|-------|-------|
| AS94_00560 | glyceraldehyde-3-phosphate dehydrogenase          | 0.674 | 0.000 | 0.000 |
| AS94_00590 | translation initiation factor IF-3                | 1.200 | 0.000 | 0.000 |
| AS94_00595 | 50S ribosomal protein L35                         | 1.376 | 0.000 | 0.000 |
| AS94_00600 | 50S ribosomal protein L20                         | 1.353 | 0.000 | 0.000 |
| AS94_00605 | DNA mismatch repair protein MutT                  | 0.476 | 0.015 | 0.031 |
| AS94_00615 | trigger factor                                    | 1.057 | 0.000 | 0.000 |
| AS94_00620 | ATP-dependent protease                            | 0.740 | 0.000 | 0.000 |
| AS94_00625 | GTP-binding protein YsxC                          | 0.620 | 0.002 | 0.004 |
| AS94_00630 | glutamyl-tRNA reductase                           | 0.366 | 0.000 | 0.001 |
| AS94_00635 | cytochrome C assembly protein                     | 0.707 | 0.000 | 0.000 |
| AS94_00640 | porphobilinogen deaminase                         | 0.816 | 0.000 | 0.000 |
| AS94_00660 | aminopeptidase                                    | 0.345 | 0.009 | 0.021 |
| AS94_00670 | valyl-tRNA synthase                               | 0.361 | 0.001 | 0.002 |
| AS94_00700 | membrane protein                                  | 3.845 | 0.000 | 0.000 |
| AS94_00705 | hypothetical protein                              | 4.743 | 0.000 | 0.000 |
| AS94_00710 | rod shape-determining protein MreC                | 0.865 | 0.000 | 0.000 |
| AS94_00715 | rod shape-determining protein MreD                | 0.839 | 0.000 | 0.000 |
| AS94_00760 | queueine tRNA-ribosyltransferase                  | 0.546 | 0.000 | 0.000 |
| AS94_00775 | single-stranded-DNA exonuclease                   | 0.297 | 0.011 | 0.024 |
| AS94_00815 | hypothetical protein                              | 0.338 | 0.007 | 0.016 |
| AS94_00830 | hypothetical protein                              | 1.817 | 0.000 | 0.000 |
| AS94_00835 | hypothetical protein                              | 0.851 | 0.012 | 0.026 |
| AS94_00910 | allophanate hydrolase subunit 1                   | 2.559 | 0.000 | 0.000 |
| AS94_00915 | allophanate hydrolase subunit 2                   | 2.558 | 0.000 | 0.000 |
| AS94_00920 | acetyl-CoA carboxylase                            | 2.132 | 0.000 | 0.000 |
| AS94_00925 | acetyl-CoA carboxylase biotin carboxylase subunit | 2.006 | 0.000 | 0.000 |
| AS94_00930 | hypothetical protein                              | 1.816 | 0.000 | 0.000 |
| AS94_00935 | iron transporter                                  | 1.412 | 0.000 | 0.000 |
| AS94_00955 | S-adenosylhomocysteine nucleosidase               | 1.082 | 0.000 | 0.000 |
| AS94_00960 | hypothetical protein                              | 1.271 | 0.000 | 0.000 |
| AS94_00965 | GTPase                                            | 1.316 | 0.000 | 0.000 |

|            |                                                      |       |       |       |
|------------|------------------------------------------------------|-------|-------|-------|
| AS94_00970 | shikimate 5-dehydrogenase                            | 1.238 | 0.000 | 0.000 |
| AS94_00975 | RNA-binding protein                                  | 1.600 | 0.016 | 0.033 |
| AS94_00980 | nicotinic acid mononucleotide<br>adenylyltransferase | 1.237 | 0.000 | 0.000 |
| AS94_00985 | HAD family hydrolase                                 | 1.203 | 0.000 | 0.000 |
| AS94_00990 | Ioja family protein                                  | 1.158 | 0.000 | 0.000 |
| AS94_00995 | methyltransferase                                    | 1.162 | 0.000 | 0.000 |
| AS94_01020 | 30S ribosomal protein S20                            | 0.813 | 0.000 | 0.000 |
| AS94_01035 | HrcA family transcriptional regulator                | 0.382 | 0.003 | 0.007 |
| AS94_01040 | heat shock protein GrpE                              | 0.332 | 0.007 | 0.017 |
| AS94_01050 | molecular chaperone DnaJ                             | 0.880 | 0.000 | 0.000 |
| AS94_01055 | ribosomal protein L11<br>methyltransferase           | 1.069 | 0.000 | 0.000 |
| AS94_01060 | 16S rRNA methyltransferase                           | 0.938 | 0.000 | 0.000 |
| AS94_01070 | 30S ribosomal protein S21                            | 0.750 | 0.000 | 0.000 |
| AS94_01075 | serine protease                                      | 0.726 | 0.000 | 0.000 |
| AS94_01080 | hypothetical protein                                 | 0.434 | 0.000 | 0.001 |
| AS94_01085 | iron transporter                                     | 0.476 | 0.000 | 0.000 |
| AS94_01120 | glycyl-tRNA synthetase                               | 1.455 | 0.000 | 0.000 |
| AS94_01145 | SAM-dependent methyltransferase                      | 0.715 | 0.000 | 0.000 |
| AS94_01150 | hypothetical protein                                 | 0.445 | 0.003 | 0.008 |
| AS94_01190 | penicillin-binding protein 3                         | 0.412 | 0.001 | 0.002 |
| AS94_01195 | 50S ribosomal protein L33                            | 0.880 | 0.000 | 0.001 |
| AS94_01200 | 5-formyltetrahydrofolate cyclo-ligase                | 0.544 | 0.009 | 0.019 |
| AS94_01205 | membrane protein                                     | 0.761 | 0.000 | 0.000 |
| AS94_01215 | glucokinase                                          | 0.731 | 0.000 | 0.000 |
| AS94_01220 | hypothetical protein                                 | 0.830 | 0.001 | 0.004 |
| AS94_01225 | hydroxyacylglutathione hydrolase                     | 0.715 | 0.000 | 0.000 |
| AS94_01305 | elongation factor P                                  | 0.635 | 0.000 | 0.000 |
| AS94_01310 | acetyl-CoA carboxylase                               | 0.851 | 0.000 | 0.000 |
| AS94_01315 | acetyl-CoA carboxylase biotin<br>carboxylase subunit | 0.847 | 0.000 | 0.000 |
| AS94_01320 | hypothetical protein                                 | 0.790 | 0.000 | 0.000 |

|            |                                               |       |       |       |
|------------|-----------------------------------------------|-------|-------|-------|
| AS94_01325 | transcription antitermination protein<br>NusB | 0.587 | 0.001 | 0.002 |
| AS94_01330 | exodeoxyribonuclease VII large subunit        | 0.691 | 0.000 | 0.000 |
| AS94_01340 | geranyltranstransferase                       | 0.603 | 0.000 | 0.000 |
| AS94_01345 | arginine repressor ArgR                       | 1.174 | 0.000 | 0.000 |
| AS94_01350 | DNA repair protein RecN                       | 1.368 | 0.000 | 0.000 |
| AS94_01355 | dihydrolipoamide dehydrogenase                | 0.664 | 0.000 | 0.000 |
| AS94_01375 | hypothetical protein                          | 0.830 | 0.000 | 0.000 |
| AS94_01380 | membrane protein                              | 0.676 | 0.000 | 0.000 |
| AS94_01485 | PhoP family transcriptional regulator         | 0.497 | 0.000 | 0.000 |
| AS94_01495 | hypothetical protein                          | 1.190 | 0.000 | 0.000 |
| AS94_01500 | hypothetical protein                          | 1.027 | 0.000 | 0.000 |
| AS94_01505 | hypothetical protein                          | 0.570 | 0.007 | 0.016 |
| AS94_01510 | Riboflavin transporter RibU                   | 0.378 | 0.022 | 0.045 |
| AS94_01520 | hypothetical protein                          | 0.418 | 0.022 | 0.046 |
| AS94_01525 | ATP-dependent DNA helicase RecQ               | 0.465 | 0.003 | 0.007 |
| AS94_01530 | peptidoglycan-binding protein LysM            | 0.259 | 0.015 | 0.031 |
| AS94_01535 | thioredoxin reductase                         | 0.324 | 0.010 | 0.022 |
| AS94_01550 | 30S ribosomal protein S1                      | 0.414 | 0.000 | 0.000 |
| AS94_01585 | nucleoside diphosphate kinase                 | 0.787 | 0.000 | 0.000 |
| AS94_01655 | asparaginyl-tRNA synthase                     | 0.561 | 0.000 | 0.000 |
| AS94_01675 | transglycosylase                              | 1.190 | 0.000 | 0.000 |
| AS94_01680 | recombinase RecU                              | 1.159 | 0.000 | 0.000 |
| AS94_01685 | hypothetical protein                          | 0.913 | 0.000 | 0.000 |
| AS94_01690 | hypothetical protein                          | 1.081 | 0.000 | 0.000 |
| AS94_01695 | cell cycle protein GpsB                       | 1.211 | 0.000 | 0.000 |
| AS94_01705 | RNA methyltransferase                         | 1.002 | 0.000 | 0.000 |
| AS94_01710 | hypothetical protein                          | 0.892 | 0.000 | 0.001 |
| AS94_01715 | sulfite reductase subunit alpha               | 1.860 | 0.000 | 0.000 |
| AS94_01720 | dynammin family protein                       | 0.696 | 0.000 | 0.000 |
| AS94_01725 | 5'-3' exonuclease                             | 0.386 | 0.016 | 0.034 |
| AS94_01785 | thymidylate synthase                          | 0.675 | 0.000 | 0.000 |

|            |                                                                                 |       |       |       |
|------------|---------------------------------------------------------------------------------|-------|-------|-------|
| AS94_01830 | UDP-diphospho-<br>muramoylpentapeptide beta-N-<br>acetylglucosaminyltransferase | 0.617 | 0.000 | 0.000 |
| AS94_01835 | phosphatidic acid phosphatase                                                   | 0.783 | 0.000 | 0.000 |
| AS94_01855 | 2-oxoglutarate dehydrogenase E1                                                 | 0.400 | 0.000 | 0.000 |
| AS94_01860 | dihydrolipoamide succinyltransferase                                            | 0.266 | 0.012 | 0.026 |
| AS94_01890 | hypothetical protein                                                            | 0.760 | 0.000 | 0.000 |
| AS94_01895 | nitric oxide reductase activation protein<br>NorD                               | 0.444 | 0.001 | 0.002 |
| AS94_01900 | branched-chain amino acid ABC<br>transporter substrate-binding protein          | 0.431 | 0.014 | 0.030 |
| AS94_01905 | tellurite resistance protein TelA                                               | 0.509 | 0.000 | 0.000 |
| AS94_01910 | 5-bromo-4-chloroindolyl phosphate<br>hydrolysis protein                         | 0.560 | 0.001 | 0.004 |
| AS94_01915 | acylphosphatase                                                                 | 0.727 | 0.000 | 0.001 |
| AS94_01970 | aspartate-semialdehyde dehydrogenase                                            | 0.689 | 0.007 | 0.017 |
| AS94_01975 | aspartate kinase                                                                | 0.920 | 0.001 | 0.003 |
| AS94_01980 | ABC transporter ATP-binding protein                                             | 0.324 | 0.009 | 0.020 |
| AS94_01990 | thioredoxine reductase                                                          | 1.098 | 0.007 | 0.016 |
| AS94_02120 | LytR family transcriptional regulator                                           | 1.111 | 0.000 | 0.000 |
| AS94_02130 | phosphatidylglycerol lysyltransferase                                           | 0.502 | 0.000 | 0.000 |
| AS94_02150 | sodium:alanine symporter                                                        | 0.434 | 0.001 | 0.003 |
| AS94_02155 | DNA topoisomerase IV subunit A                                                  | 0.486 | 0.000 | 0.000 |
| AS94_02160 | DNA topoisomerase IV subunit B                                                  | 0.661 | 0.000 | 0.000 |
| AS94_02175 | 4-hydroxybenzoyl-CoA thioesterase                                               | 0.549 | 0.000 | 0.000 |
| AS94_02180 | aconitate hydratase                                                             | 0.769 | 0.000 | 0.000 |
| AS94_02185 | choline transporter                                                             | 0.898 | 0.000 | 0.000 |
| AS94_02205 | membrane protein                                                                | 0.737 | 0.000 | 0.000 |
| AS94_02240 | secretion protein                                                               | 0.922 | 0.000 | 0.000 |
| AS94_02245 | guanosine 5'-monophosphate<br>oxidoreductase                                    | 1.619 | 0.000 | 0.000 |
| AS94_02275 | HAD family hydrolase                                                            | 0.310 | 0.014 | 0.029 |
| AS94_02280 | homoserine kinase                                                               | 0.840 | 0.000 | 0.000 |

|            |                                          |       |       |       |
|------------|------------------------------------------|-------|-------|-------|
| AS94_02285 | threonine synthase                       | 0.453 | 0.001 | 0.004 |
| AS94_02290 | homoserine dehydrogenase                 | 0.629 | 0.000 | 0.000 |
| AS94_02295 | aspartate kinase                         | 1.302 | 0.000 | 0.000 |
| AS94_02300 | hypothetical protein                     | 0.713 | 0.000 | 0.001 |
| AS94_02505 | MerR family transcriptional regulator    | 0.714 | 0.000 | 0.000 |
| AS94_02560 | DNA mismatch repair protein MutL         | 0.448 | 0.000 | 0.001 |
| AS94_02565 | DNA mismatch repair protein MutS         | 0.538 | 0.000 | 0.000 |
| AS94_02620 | competence protein CinA                  | 0.452 | 0.002 | 0.005 |
| AS94_02635 | hypothetical protein                     | 0.311 | 0.023 | 0.046 |
| AS94_02645 | zinc protease                            | 0.461 | 0.003 | 0.007 |
| AS94_02675 | 30S ribosomal protein S15                | 0.598 | 0.000 | 0.000 |
| AS94_02685 | tRNA pseudouridine synthase B            | 0.498 | 0.006 | 0.014 |
| AS94_02700 | 50S ribosomal protein L7                 | 0.404 | 0.021 | 0.043 |
| AS94_02710 | transcription elongation factor NusA     | 0.535 | 0.000 | 0.000 |
| AS94_02715 | ribosome maturation protein RimP         | 0.588 | 0.000 | 0.000 |
| AS94_02725 | prolyl-tRNA synthetase                   | 0.658 | 0.000 | 0.000 |
| AS94_02730 | zinc metalloprotease                     | 0.744 | 0.000 | 0.000 |
| AS94_02735 | phosphatidate cytidylyltransferase       | 0.544 | 0.000 | 0.000 |
| AS94_02740 | UDP pyrophosphate synthase               | 0.939 | 0.000 | 0.000 |
| AS94_02755 | elongation factor Ts                     | 1.044 | 0.000 | 0.000 |
| AS94_02760 | 30S ribosomal protein S2                 | 1.301 | 0.000 | 0.000 |
| AS94_02765 | transcriptional regulator                | 0.812 | 0.000 | 0.000 |
| AS94_02770 | ATP-dependent protease                   | 0.999 | 0.000 | 0.000 |
| AS94_02775 | ATP-dependent protease                   | 1.002 | 0.000 | 0.000 |
| AS94_02780 | tyrosine recombinase XerC                | 1.153 | 0.000 | 0.000 |
| AS94_02785 | tRNA (uracil-5-)-methyltransferase       | 0.658 | 0.000 | 0.000 |
| AS94_02790 | DNA topoisomerase I                      | 0.853 | 0.000 | 0.000 |
| AS94_02815 | succinyl-CoA synthetase subunit<br>alpha | 0.794 | 0.000 | 0.000 |
| AS94_02820 | malate--CoA ligase subunit beta          | 1.079 | 0.000 | 0.000 |
| AS94_02845 | 50S ribosomal protein L19                | 0.873 | 0.000 | 0.000 |
| AS94_02860 | 30S ribosomal protein S16                | 0.434 | 0.005 | 0.011 |
| AS94_02880 | chromosome segregation protein SMC       | 0.313 | 0.008 | 0.017 |

|            |                                                      |       |       |       |
|------------|------------------------------------------------------|-------|-------|-------|
| AS94_02890 | acyl carrier protein                                 | 0.624 | 0.000 | 0.000 |
| AS94_02895 | 3-ketoacyl-ACP reductase                             | 0.304 | 0.014 | 0.029 |
| AS94_02900 | malonyl CoA-ACP transacylase                         | 0.332 | 0.005 | 0.012 |
| AS94_02905 | phosphate acyltransferase                            | 0.676 | 0.000 | 0.000 |
| AS94_02910 | transcription factor                                 | 0.920 | 0.000 | 0.000 |
| AS94_02920 | hypothetical protein                                 | 0.820 | 0.000 | 0.000 |
| AS94_02925 | hypothetical protein                                 | 0.454 | 0.001 | 0.004 |
| AS94_02945 | GTPase                                               | 0.416 | 0.005 | 0.013 |
| AS94_02965 | 16S rRNA methyltransferase                           | 0.343 | 0.010 | 0.022 |
| AS94_03015 | 3-demethylubiquinone-9 3-methyltransferase           | 0.446 | 0.004 | 0.009 |
| AS94_03025 | orotate phosphoribosyltransferase                    | 1.225 | 0.000 | 0.000 |
| AS94_03030 | orotidine 5'-phosphate decarboxylase                 | 1.430 | 0.000 | 0.000 |
| AS94_03035 | carbamoyl phosphate synthase large subunit           | 1.017 | 0.000 | 0.000 |
| AS94_03040 | carbamoyl phosphate synthase small subunit           | 0.724 | 0.001 | 0.002 |
| AS94_03045 | dihydroorotase                                       | 0.553 | 0.002 | 0.006 |
| AS94_03055 | uracil transporter                                   | 0.422 | 0.025 | 0.050 |
| AS94_03065 | ribosomal large subunit pseudouridine synthase D     | 0.311 | 0.019 | 0.039 |
| AS94_03115 | cell division protein FtsZ                           | 0.639 | 0.000 | 0.000 |
| AS94_03120 | cell division protein FtsA                           | 0.745 | 0.000 | 0.000 |
| AS94_03125 | cell division protein FtsQ                           | 0.878 | 0.000 | 0.000 |
| AS94_03130 | UDP-N-acetylmuramoyl-L-alanyl-D-glutamate synthetase | 0.874 | 0.000 | 0.000 |
| AS94_03135 | phospho-N-acetylmuramoyl-pentapeptide- transferase   | 0.862 | 0.000 | 0.000 |
| AS94_03140 | penicillin-binding protein 1                         | 1.055 | 0.000 | 0.000 |
| AS94_03145 | cell division protein FtsL                           | 0.851 | 0.000 | 0.000 |
| AS94_03150 | 16S rRNA methyltransferase                           | 1.112 | 0.000 | 0.000 |
| AS94_03155 | cell division protein MraZ                           | 1.223 | 0.000 | 0.000 |
| AS94_03165 | hypothetical protein                                 | 0.912 | 0.000 | 0.000 |

|            |                                                                    |       |       |       |
|------------|--------------------------------------------------------------------|-------|-------|-------|
| AS94_03175 | hypothetical protein                                               | 1.653 | 0.000 | 0.001 |
| AS94_03180 | hypothetical protein                                               | 1.556 | 0.001 | 0.003 |
| AS94_03195 | ethanolamine utilization protein EutQ                              | 0.891 | 0.000 | 0.000 |
| AS94_03245 | leukocidin/Hemolysin toxin family<br>protein                       | 2.663 | 0.000 | 0.000 |
| AS94_03310 | succinate dehydrogenase flavoprotein<br>subunit                    | 0.483 | 0.000 | 0.001 |
| AS94_03315 | succinate dehydrogenase cytochrome<br>B558                         | 0.552 | 0.000 | 0.000 |
| AS94_03320 | excinuclease ABC subunit C                                         | 0.295 | 0.020 | 0.041 |
| AS94_03330 | DNA mismatch repair protein MutS                                   | 0.661 | 0.000 | 0.000 |
| AS94_03335 | DNA polymerase                                                     | 0.684 | 0.000 | 0.000 |
| AS94_03415 | DNA-binding protein                                                | 0.334 | 0.011 | 0.025 |
| AS94_03445 | glycerophosphoryl diester<br>phosphodiesterase                     | 0.404 | 0.011 | 0.025 |
| AS94_03460 | membrane protein                                                   | 0.330 | 0.012 | 0.025 |
| AS94_03465 | protoheme IX farnesyltransferase                                   | 0.489 | 0.000 | 0.000 |
| AS94_03470 | heme A synthase                                                    | 0.634 | 0.000 | 0.000 |
| AS94_03495 | GTP-binding protein                                                | 0.801 | 0.000 | 0.000 |
| AS94_03530 | spermidine/putrescine ABC transporter<br>substrate-binding protein | 0.732 | 0.000 | 0.000 |
| AS94_03535 | spermidine/puresscine ABC transporter<br>permease                  | 0.712 | 0.020 | 0.042 |
| AS94_03550 | Cro/C1 family transcriptional regulator                            | 0.777 | 0.021 | 0.042 |
| AS94_03600 | potassium transporter Trk                                          | 0.917 | 0.000 | 0.000 |
| AS94_03605 | cytochrome D ubiquinol oxidase<br>subunit II                       | 2.267 | 0.000 | 0.000 |
| AS94_03610 | cytochrome D ubiquinol oxidase<br>subunit I                        | 2.164 | 0.000 | 0.000 |
| AS94_03620 | phosphoenolpyruvate-protein<br>phosphotransferase                  | 0.790 | 0.000 | 0.000 |
| AS94_03625 | phosphocarrier protein HPr                                         | 0.650 | 0.000 | 0.000 |
| AS94_03630 | hypothetical protein                                               | 0.791 | 0.000 | 0.000 |



|            |                                                              |       |       |       |
|------------|--------------------------------------------------------------|-------|-------|-------|
| AS94_03640 | membrane protein                                             | 0.810 | 0.000 | 0.000 |
| AS94_03665 | phosphoribosylamine--glycine ligase                          | 0.763 | 0.000 | 0.000 |
| AS94_03670 | purine biosynthesis protein purH                             | 1.316 | 0.000 | 0.000 |
| AS94_03675 | phosphoribosylglycinamide<br>formyltransferase               | 1.580 | 0.000 | 0.000 |
| AS94_03680 | phosphoribosylaminoimidazole<br>synthetase                   | 1.747 | 0.000 | 0.000 |
| AS94_03685 | amidophosphoribosyltransferase                               | 1.476 | 0.000 | 0.000 |
| AS94_03690 | phosphoribosylformylglycinamidine<br>synthase                | 1.275 | 0.000 | 0.000 |
| AS94_03695 | phosphoribosylformylglycinamidine<br>synthase                | 1.063 | 0.000 | 0.001 |
| AS94_03705 | phosphoribosylaminoimidazole-<br>succinocarboxamide synthase | 0.961 | 0.007 | 0.015 |
| AS94_03710 | phosphoribosylaminoimidazole<br>carboxylase                  | 1.272 | 0.000 | 0.000 |
| AS94_03720 | tetrahydrofolate dehydrogenase                               | 0.734 | 0.000 | 0.000 |
| AS94_03730 | chitinase                                                    | 0.998 | 0.000 | 0.000 |
| AS94_03755 | methicillin resistance protein FmtA                          | 1.096 | 0.000 | 0.000 |
| AS94_03785 | acyltransferase                                              | 0.849 | 0.005 | 0.012 |
| AS94_03850 | ABC transporter substrate-binding<br>protein                 | 1.107 | 0.011 | 0.024 |
| AS94_03865 | membrane protein                                             | 1.708 | 0.001 | 0.002 |
| AS94_03885 | CAAX amino terminal protease                                 | 0.972 | 0.000 | 0.000 |
| AS94_03960 | MFS transporter                                              | 0.330 | 0.006 | 0.014 |
| AS94_03965 | hypothetical protein                                         | 0.692 | 0.000 | 0.000 |
| AS94_04055 | tryptophanyl-tRNA synthetase                                 | 0.433 | 0.001 | 0.002 |
| AS94_04085 | peptide ABC transporter substrate-<br>binding protein        | 0.579 | 0.000 | 0.000 |
| AS94_04090 | peptide ABC transporter ATP-binding<br>protein               | 0.747 | 0.000 | 0.001 |
| AS94_04095 | peptide ABC transporter ATP-binding<br>protein               | 0.695 | 0.002 | 0.006 |

|            |                                                         |       |       |       |
|------------|---------------------------------------------------------|-------|-------|-------|
| AS94_04100 | peptide ABC transporter permease                        | 0.794 | 0.000 | 0.000 |
| AS94_04105 | peptide ABC transporter permease                        | 0.991 | 0.000 | 0.000 |
| AS94_04115 | 3-oxoacyl-ACP synthase                                  | 0.719 | 0.000 | 0.000 |
| AS94_04120 | 3-oxoacyl-ACP synthase                                  | 1.095 | 0.000 | 0.000 |
| AS94_04170 | hypothetical protein                                    | 0.867 | 0.000 | 0.000 |
| AS94_04190 | signal peptidase IB                                     | 1.090 | 0.000 | 0.000 |
| AS94_04195 | signal peptidase I                                      | 1.056 | 0.000 | 0.000 |
| AS94_04200 | hypothetical protein                                    | 0.632 | 0.000 | 0.000 |
| AS94_04220 | argininosuccinate synthase                              | 6.222 | 0.000 | 0.000 |
| AS94_04225 | argininosuccinate lyase                                 | 5.619 | 0.000 | 0.000 |
| AS94_04240 | ornithine-oxoacid aminotransferase                      | 0.351 | 0.001 | 0.003 |
| AS94_04320 | NADH dehydrogenase                                      | 0.899 | 0.000 | 0.000 |
| AS94_04350 | D-alanyl-lipoteichoic acid biosynthesis<br>protein DltD | 0.797 | 0.000 | 0.000 |
| AS94_04360 | D-alanyl transfer protein DltB                          | 0.780 | 0.000 | 0.000 |
| AS94_04365 | D-alanine--poly(phosphoribitol) ligase                  | 0.872 | 0.000 | 0.000 |
| AS94_04395 | hypothetical protein                                    | 0.454 | 0.012 | 0.026 |
| AS94_04405 | 5'-nucleotidase                                         | 0.552 | 0.000 | 0.000 |
| AS94_04410 | membrane protein                                        | 0.580 | 0.002 | 0.005 |
| AS94_04415 | hypothetical protein                                    | 0.536 | 0.001 | 0.002 |
| AS94_04445 | cysteine desulfurase                                    | 0.264 | 0.017 | 0.035 |
| AS94_04450 | Fe-S cluster assembly protein SufD                      | 0.594 | 0.000 | 0.000 |
| AS94_04455 | iron ABC transporter ATP-binding<br>protein             | 0.651 | 0.000 | 0.000 |
| AS94_04460 | hypothetical protein                                    | 0.945 | 0.000 | 0.000 |
| AS94_04485 | thioredoxin                                             | 0.846 | 0.000 | 0.000 |
| AS94_04490 | topiosmerase                                            | 0.640 | 0.002 | 0.005 |
| AS94_04525 | peroxiredoxin                                           | 0.828 | 0.000 | 0.000 |
| AS94_04540 | phosphoglycerate mutase                                 | 1.008 | 0.000 | 0.000 |
| AS94_04550 | hypothetical protein                                    | 1.038 | 0.000 | 0.000 |
| AS94_04575 | hypothetical protein                                    | 0.714 | 0.002 | 0.005 |
| AS94_04605 | clumping factor A                                       | 0.877 | 0.000 | 0.000 |
| AS94_04635 | enterotoxin                                             | 0.311 | 0.004 | 0.010 |

|            |                                         |       |       |       |
|------------|-----------------------------------------|-------|-------|-------|
| AS94_04655 | hypothetical protein                    | 0.459 | 0.000 | 0.001 |
| AS94_04670 | hydrolase                               | 1.617 | 0.000 | 0.000 |
| AS94_04725 | haloacid dehalogenase                   | 1.509 | 0.000 | 0.000 |
| AS94_04730 | glycine/betaine MFS transporter         | 1.488 | 0.000 | 0.000 |
| AS94_04735 | long-chain fatty acid--CoA ligase       | 4.180 | 0.000 | 0.000 |
| AS94_04740 | acetyl-CoA acetyltransferase            | 2.242 | 0.000 | 0.000 |
| AS94_04745 | vraC                                    | 1.973 | 0.001 | 0.002 |
| AS94_04750 | hypothetical protein                    | 3.222 | 0.000 | 0.000 |
| AS94_04755 | vraX                                    | 3.049 | 0.000 | 0.000 |
| AS94_04780 | amino acid permease                     | 1.289 | 0.000 | 0.000 |
| AS94_04810 | mevalonate kinase                       | 1.594 | 0.000 | 0.000 |
| AS94_04815 | diphosphomevalonate decarboxylase       | 1.814 | 0.000 | 0.000 |
| AS94_04820 | phosphomevalonate kinase                | 1.673 | 0.000 | 0.000 |
| AS94_04840 | transposase                             | 0.710 | 0.000 | 0.000 |
| AS94_04850 | hypothetical protein                    | 0.755 | 0.022 | 0.045 |
| AS94_04865 | oxidoreductase ion channel protein IolS | 0.386 | 0.008 | 0.018 |
| AS94_04950 | lysyl-tRNA synthetase                   | 0.452 | 0.000 | 0.000 |
|            | 2-amino-4-hydroxy-6-                    |       |       |       |
| AS94_04955 | hydroxymethyldihydropteridine           | 1.104 | 0.000 | 0.000 |
|            | pyrophosphokinase                       |       |       |       |
| AS94_04960 | dihydroneopterin aldolase               | 1.683 | 0.000 | 0.000 |
| AS94_04965 | dihydropteroate synthase                | 2.204 | 0.000 | 0.000 |
| AS94_04980 | zinc metalloprotease                    | 0.610 | 0.000 | 0.000 |
|            | hypoxanthine                            |       |       |       |
| AS94_04985 | phosphoribosyltransferase               | 0.524 | 0.000 | 0.001 |
| AS94_05140 | hypothetical protein                    | 0.718 | 0.002 | 0.005 |
| AS94_05160 | Na/Pi cotransporter                     | 0.860 | 0.000 | 0.000 |
| AS94_05330 | membrane protein                        | 5.305 | 0.002 | 0.005 |
| AS94_05340 | replication initiation factor family    |       |       |       |
|            | protein                                 | 2.706 | 0.013 | 0.028 |
| AS94_05345 | hypothetical protein                    | 2.940 | 0.016 | 0.033 |
| AS94_05350 | hypothetical protein                    | 3.020 | 0.014 | 0.031 |
| AS94_05355 | hypothetical protein                    | 3.042 | 0.016 | 0.034 |

|            |              |                                             |       |       |       |
|------------|--------------|---------------------------------------------|-------|-------|-------|
| AS94_05435 |              | integrase                                   | 1.176 | 0.009 | 0.021 |
| AS94_05465 |              | hemolysin III                               | 0.562 | 0.000 | 0.000 |
| AS94_05470 |              | uridylyltransferase                         | 0.526 | 0.000 | 0.000 |
| AS94_05475 |              | membrane protein                            | 0.402 | 0.006 | 0.015 |
| AS94_05480 |              | hypothetical protein                        | 0.399 | 0.001 | 0.002 |
| AS94_05485 |              | membrane protein                            | 2.663 | 0.000 | 0.000 |
| AS94_05525 | <i>asp23</i> | alkaline shock protein 23                   | 1.326 | 0.000 | 0.000 |
| AS94_05530 |              | membrane protein                            | 0.988 | 0.000 | 0.000 |
| AS94_05535 |              | hypothetical protein                        | 0.950 | 0.000 | 0.000 |
| AS94_05540 |              | glycine/betaine ABC transporter<br>permease | 1.635 | 0.000 | 0.000 |
| AS94_05625 |              | hyaluronate lyase                           | 0.555 | 0.002 | 0.004 |
| AS94_05650 |              | toxin                                       | 1.123 | 0.000 | 0.000 |
| AS94_05670 |              | membrane protein                            | 1.135 | 0.012 | 0.025 |
| AS94_05680 |              | 30S ribosomal protein S9                    | 1.190 | 0.000 | 0.000 |
| AS94_05685 |              | 50S ribosomal protein L13                   | 1.212 | 0.000 | 0.000 |
| AS94_05785 |              | 50S ribosomal protein L5                    | 0.333 | 0.013 | 0.027 |
| AS94_05790 |              | 50S ribosomal protein L24                   | 0.436 | 0.002 | 0.005 |
| AS94_05800 |              | 30S ribosomal protein S17                   | 0.567 | 0.003 | 0.007 |
| AS94_05810 |              | 50S ribosomal protein L16                   | 0.513 | 0.000 | 0.001 |
| AS94_05815 |              | 30S ribosomal protein S3                    | 0.501 | 0.000 | 0.001 |
| AS94_05820 |              | 50S ribosomal protein L22                   | 0.396 | 0.005 | 0.013 |
| AS94_05825 |              | 30S ribosomal protein S19                   | 0.439 | 0.004 | 0.009 |
| AS94_05830 |              | 50S ribosomal protein L2                    | 0.464 | 0.000 | 0.001 |
| AS94_05840 |              | 50S ribosomal protein L4                    | 0.427 | 0.001 | 0.003 |
| AS94_05845 |              | 50S ribosomal protein L3                    | 0.615 | 0.000 | 0.000 |
| AS94_05850 |              | 30S ribosomal protein S10                   | 0.939 | 0.000 | 0.000 |
| AS94_05860 |              | guanine permease                            | 0.678 | 0.000 | 0.000 |
| AS94_05900 |              | aminoacyltransferase                        | 0.292 | 0.011 | 0.024 |
| AS94_06080 |              | hypothetical protein                        | 1.519 | 0.000 | 0.000 |
| AS94_06085 |              | sodium:proton antiporter                    | 0.882 | 0.000 | 0.000 |
| AS94_06090 |              | octopine dehydrogenase                      | 0.705 | 0.000 | 0.000 |
| AS94_06145 |              | LytR family transcriptional regulator       | 0.714 | 0.000 | 0.000 |

|            |                                                      |       |       |       |
|------------|------------------------------------------------------|-------|-------|-------|
| AS94_06170 | RpiR family transcriptional regulator                | 0.363 | 0.006 | 0.014 |
| AS94_06205 | hypothetical protein                                 | 2.047 | 0.000 | 0.000 |
| AS94_06245 | imidazolonepropionase                                | 2.049 | 0.000 | 0.000 |
| AS94_06250 | urocanate hydratase                                  | 1.987 | 0.000 | 0.000 |
| AS94_06300 | hypothetical protein                                 | 0.877 | 0.000 | 0.000 |
| AS94_06310 | sodium:glutamate symporter                           | 1.092 | 0.000 | 0.000 |
| AS94_06325 | 3-hydroxyacyl-CoA dehydrogenase                      | 0.555 | 0.014 | 0.030 |
| AS94_06365 | membrane protein                                     | 1.854 | 0.000 | 0.000 |
| AS94_06375 | membrane protein                                     | 0.520 | 0.003 | 0.008 |
| AS94_06425 | malate:quinone oxidoreductase                        | 0.620 | 0.000 | 0.000 |
| AS94_06450 | quinone oxidoreductase                               | 0.523 | 0.000 | 0.001 |
| AS94_06655 | amino acid ABC transporter substrate-binding protein | 0.566 | 0.000 | 0.000 |
| AS94_06670 | phosphoglyceromutase                                 | 0.512 | 0.000 | 0.000 |
| AS94_06680 | hypothetical protein                                 | 1.422 | 0.000 | 0.000 |
| AS94_06685 | gamma-hemolysin subunit A                            | 0.618 | 0.005 | 0.011 |
| AS94_06755 | glycerate kinase                                     | 1.650 | 0.000 | 0.000 |
| AS94_06760 | membrane protein                                     | 1.748 | 0.000 | 0.000 |
| AS94_06770 | transcriptional regulator                            | 1.261 | 0.000 | 0.000 |
| AS94_06855 | chloramphenicol resistance protein DHA1              | 0.710 | 0.000 | 0.001 |
| AS94_06940 | short-chain dehydrogenase                            | 0.676 | 0.000 | 0.000 |
| AS94_06945 | aminobenzoyl-glutamate transporter                   | 1.029 | 0.000 | 0.000 |
| AS94_06980 | hypothetical protein                                 | 0.494 | 0.004 | 0.010 |
| AS94_07095 | membrane protein                                     | 0.710 | 0.000 | 0.000 |
| AS94_07100 | glucarate transporter                                | 0.367 | 0.019 | 0.040 |
| AS94_07160 | D-lactate dehydrogenase                              | 0.537 | 0.001 | 0.003 |
| AS94_07190 | serine dehydratase subunit alpha                     | 1.350 | 0.000 | 0.000 |
| AS94_07195 | serine dehydratase                                   | 1.304 | 0.000 | 0.000 |
| AS94_07200 | transcriptional regulator                            | 1.123 | 0.000 | 0.000 |
| AS94_07270 | hydroxymethylglutaryl-CoA synthase                   | 1.456 | 0.000 | 0.000 |
| AS94_07280 | Clp protease ATP-binding protein                     | 1.513 | 0.000 | 0.000 |

|            |             |                                                         |        |       |       |
|------------|-------------|---------------------------------------------------------|--------|-------|-------|
| AS94_07310 |             | 1-pyrroline-5-carboxylate<br>dehydrogenase              | 0.884  | 0.000 | 0.000 |
| AS94_07320 |             | hypothetical protein                                    | 3.453  | 0.000 | 0.000 |
| AS94_07345 |             | dehydrosqualene desaturase                              | 0.341  | 0.004 | 0.010 |
| AS94_07350 |             | dehydrosqualene synthase                                | 1.071  | 0.000 | 0.000 |
| AS94_07355 |             | 4_4'-diaponeurosporenoate<br>glycosyltransferase        | 0.774  | 0.000 | 0.000 |
| AS94_07360 |             | diapolycopene oxygenase                                 | 0.709  | 0.000 | 0.000 |
| AS94_07385 |             | transglycosylase                                        | 0.996  | 0.000 | 0.000 |
| AS94_07480 |             | dihydroorotate dehydrogenase                            | 0.910  | 0.000 | 0.000 |
| AS94_07505 |             | acyl esterase                                           | 0.367  | 0.015 | 0.032 |
| AS94_07540 |             | amino acid permease                                     | 1.179  | 0.000 | 0.000 |
| AS94_07545 |             | 4-aminobutyrate aminotransferase                        | 1.004  | 0.003 | 0.007 |
| AS94_07550 |             | membrane protein                                        | 1.650  | 0.002 | 0.006 |
| AS94_07745 |             | Replication and maintenance protein                     | 14.571 | 0.000 | 0.000 |
| AS94_07750 |             | SAM-dependent methyltransferase                         | 15.751 | 0.000 | 0.000 |
| AS94_07825 |             | membrane protein                                        | 0.632  | 0.019 | 0.040 |
| AS94_07835 | <i>sarA</i> | transcriptional regulator                               | 0.785  | 0.000 | 0.000 |
| AS94_07855 |             | recombinase                                             | 0.844  | 0.000 | 0.001 |
| AS94_07860 |             | cation:proton antiporter                                | 1.176  | 0.000 | 0.000 |
| AS94_07865 |             | cation:proton antiporter                                | 1.088  | 0.000 | 0.001 |
| AS94_07870 |             | cation:proton antiporter                                | 1.431  | 0.000 | 0.000 |
| AS94_07875 |             | cation:proton antiporter                                | 1.387  | 0.000 | 0.000 |
| AS94_07880 |             | cation:proton antiporter                                | 1.154  | 0.002 | 0.006 |
| AS94_07890 |             | cation:proton antiporter                                | 1.142  | 0.000 | 0.000 |
| AS94_07900 |             | manganese ABC transporter substrate-<br>binding protein | 0.683  | 0.000 | 0.000 |
| AS94_07905 |             | membrane protein                                        | 0.545  | 0.000 | 0.000 |
| AS94_07910 |             | phosphonate ABC transporter ATP-<br>binding protein     | 0.862  | 0.000 | 0.000 |
| AS94_07920 |             | membrane protein                                        | 1.800  | 0.000 | 0.000 |
| AS94_07955 |             | D-alanyl-D-alanine carboxypeptidase                     | 0.563  | 0.000 | 0.000 |
| AS94_08060 |             | inorganic phosphate transporter                         | 0.434  | 0.001 | 0.002 |

|            |                                                |       |       |       |
|------------|------------------------------------------------|-------|-------|-------|
| AS94_08140 | lysine decarboxylase                           | 0.514 | 0.001 | 0.003 |
| AS94_08150 | hypothetical protein                           | 0.818 | 0.000 | 0.000 |
| AS94_08155 | UDP pyrophosphate phosphatase                  | 1.261 | 0.000 | 0.000 |
| AS94_08160 | cysteine ABC transporter ATP-binding protein   | 0.405 | 0.001 | 0.001 |
| AS94_08165 | cysteine ABC transporter ATP-binding protein   | 0.549 | 0.000 | 0.000 |
| AS94_08190 | membrane protein                               | 0.539 | 0.000 | 0.000 |
| AS94_08210 | hypothetical protein                           | 0.510 | 0.004 | 0.009 |
| AS94_08215 | multidrug MFS transporter                      | 0.685 | 0.000 | 0.000 |
| AS94_08250 | hypothetical protein                           | 0.340 | 0.002 | 0.006 |
| AS94_08255 | glyoxal reductase                              | 0.753 | 0.000 | 0.000 |
| AS94_08260 | bactoprenol glucosyl transferase               | 0.614 | 0.000 | 0.000 |
| AS94_08330 | glycerol phosphate lipoteichoic acid synthase  | 1.264 | 0.000 | 0.000 |
| AS94_08345 | sulfonate ABC transporter ATP-binding protein  | 0.404 | 0.015 | 0.033 |
| AS94_08350 | ABC transporter permease                       | 0.530 | 0.000 | 0.000 |
| AS94_08375 | peptide ABC transporter permease               | 0.279 | 0.020 | 0.042 |
| AS94_08470 | membrane protein                               | 0.738 | 0.000 | 0.000 |
| AS94_08480 | hypothetical protein                           | 1.192 | 0.000 | 0.000 |
| AS94_08505 | preprotein translocase subunit SecA            | 0.384 | 0.000 | 0.001 |
| AS94_08575 | hypothetical protein                           | 0.803 | 0.000 | 0.000 |
| AS94_08580 | sporulation protein                            | 0.500 | 0.000 | 0.001 |
| AS94_08590 | ATP-dependent Clp protease proteolytic subunit | 0.457 | 0.000 | 0.000 |
| AS94_08610 | hypothetical protein                           | 0.466 | 0.000 | 0.000 |
| AS94_08615 | transcriptional regulator                      | 0.486 | 0.000 | 0.000 |
| AS94_08660 | ribonuclease R                                 | 0.397 | 0.000 | 0.001 |
| AS94_08675 | integrase                                      | 0.448 | 0.003 | 0.007 |
| AS94_08685 | hypothetical protein                           | 3.481 | 0.000 | 0.000 |
| AS94_08690 | DNA-binding protein                            | 6.649 | 0.000 | 0.000 |
| AS94_08705 | pathogenicity island protein                   | 2.733 | 0.008 | 0.018 |

|            |                                                                  |       |       |       |
|------------|------------------------------------------------------------------|-------|-------|-------|
| AS94_08810 | NA                                                               | 1.493 | 0.000 | 0.000 |
| AS94_08925 | DEAD/DEAH box helicase                                           | 0.507 | 0.000 | 0.000 |
| AS94_08960 | phospholipase D                                                  | 0.656 | 0.000 | 0.000 |
| AS94_08965 | phosphohydrolase                                                 | 0.530 | 0.000 | 0.001 |
| AS94_08970 | membrane protein                                                 | 0.613 | 0.000 | 0.000 |
| AS94_09010 | 3-hydroxyacyl-ACP dehydratase                                    | 0.341 | 0.024 | 0.048 |
| AS94_09015 | UDP-N-acetylglucosamine 1-carboxyvinyltransferase                | 0.562 | 0.000 | 0.000 |
| AS94_09020 | membrane protein                                                 | 1.061 | 0.013 | 0.028 |
| AS94_09040 | F0F1 ATP synthase subunit alpha                                  | 0.694 | 0.000 | 0.000 |
| AS94_09045 | F0F1 ATP synthase subunit delta                                  | 0.533 | 0.000 | 0.000 |
| AS94_09050 | F0F1 ATP synthase subunit B                                      | 0.776 | 0.000 | 0.000 |
| AS94_09055 | F0F1 ATP synthase subunit C                                      | 0.318 | 0.021 | 0.042 |
| AS94_09060 | F0F1 ATP synthase subunit A                                      | 0.435 | 0.000 | 0.000 |
| AS94_09065 | ATP synthase                                                     | 0.419 | 0.006 | 0.013 |
| AS94_09070 | UDP-N-acetylglucosamine 2-epimerase                              | 0.710 | 0.000 | 0.000 |
| AS94_09075 | uracil phosphoribosyltransferase                                 | 0.716 | 0.000 | 0.000 |
| AS94_09080 | serine hydroxymethyltransferase                                  | 0.589 | 0.000 | 0.000 |
| AS94_09085 | hypothetical protein                                             | 0.661 | 0.000 | 0.000 |
| AS94_09100 | N5-glutamine S-adenosyl-L-methionine-dependent methyltransferase | 0.552 | 0.000 | 0.000 |
| AS94_09105 | peptide chain release factor 1                                   | 0.684 | 0.000 | 0.000 |
| AS94_09110 | thymidine kinase                                                 | 0.545 | 0.000 | 0.001 |
| AS94_09115 | 50S ribosomal protein L31                                        | 0.378 | 0.002 | 0.006 |
| AS94_09120 | transcription termination factor Rho                             | 0.286 | 0.010 | 0.022 |
| AS94_09150 | CTP synthetase                                                   | 1.261 | 0.000 | 0.000 |
| AS94_09160 | acetyltransferase                                                | 1.323 | 0.000 | 0.000 |
| AS94_09165 | pantothenate kinase                                              | 0.898 | 0.000 | 0.000 |
| AS94_09230 | mannose-6-phosphate isomerase                                    | 0.526 | 0.001 | 0.002 |
| AS94_09240 | ArsR family transcriptional regulator                            | 1.854 | 0.000 | 0.000 |
| AS94_09245 | cation transporter                                               | 1.422 | 0.000 | 0.000 |
| AS94_09250 | lytic regulatory protein                                         | 0.641 | 0.000 | 0.000 |



|            |                                                    |       |       |       |
|------------|----------------------------------------------------|-------|-------|-------|
| AS94_09275 | PTS mannitol transporter subunit IIB               | 1.502 | 0.000 | 0.001 |
| AS94_09280 | PTS lactose transporter subunit IIB                | 1.979 | 0.000 | 0.000 |
| AS94_09285 | PTS mannitol transporter subunit IIA               | 1.613 | 0.000 | 0.000 |
| AS94_09290 | mannitol-1-phosphate 5-dehydrogenase               | 1.814 | 0.000 | 0.000 |
| AS94_09315 | arginase                                           | 0.803 | 0.000 | 0.000 |
| AS94_09380 | iron ABC transporter permease                      | 0.490 | 0.000 | 0.001 |
| AS94_09450 | membrane protein                                   | 0.766 | 0.008 | 0.018 |
| AS94_09490 | surface protein                                    | 0.567 | 0.000 | 0.000 |
| AS94_09560 | capsular polysaccharide biosynthesis protein CapA  | 1.554 | 0.000 | 0.000 |
| AS94_09565 | capsular polysaccharide biosynthesis protein Cap5B | 1.706 | 0.000 | 0.000 |
| AS94_09570 | capsular polysaccharide biosynthesis protein Cap8C | 1.635 | 0.000 | 0.000 |
| AS94_09575 | polysaccharide biosynthesis protein EpsC           | 1.580 | 0.000 | 0.000 |
| AS94_09580 | UDP-glucose 4-epimerase                            | 1.728 | 0.000 | 0.000 |
| AS94_09585 | capsular polysaccharide biosynthesis protein Cap8F | 1.526 | 0.000 | 0.000 |
| AS94_09590 | UDP-N-acetylglucosamine 2-epimerase                | 1.646 | 0.000 | 0.000 |
| AS94_09595 | capsular polysaccharide biosynthesis protein       | 1.591 | 0.000 | 0.000 |
| AS94_09600 | capsular polysaccharide biosynthesis protein       | 1.343 | 0.000 | 0.000 |
| AS94_09605 | capsular polysaccharide biosynthesis protein       | 1.211 | 0.000 | 0.000 |
| AS94_09610 | capsular polysaccharide biosynthesis protein       | 0.896 | 0.001 | 0.001 |
| AS94_09615 | glycosyltransferase family 1                       | 0.556 | 0.000 | 0.001 |
| AS94_09630 | UDP-N-acetyl-D-mannosamine dehydrogenase           | 0.311 | 0.025 | 0.049 |
| AS94_09690 | multidrug MFS transporter                          | 0.882 | 0.000 | 0.000 |

|            |                                                            |       |       |       |
|------------|------------------------------------------------------------|-------|-------|-------|
| AS94_09755 | cellobiose operon outer surface protein                    | 0.638 | 0.000 | 0.000 |
| AS94_09760 | N-acetylmuramic acid-6-phosphate<br>etherase               | 0.578 | 0.000 | 0.000 |
| AS94_09765 | permease                                                   | 0.676 | 0.000 | 0.000 |
| AS94_09770 | RpiR family transcriptional regulator                      | 0.881 | 0.000 | 0.000 |
| AS94_09820 | peptidase M23                                              | 1.093 | 0.000 | 0.000 |
| AS94_09865 | antiporter                                                 | 2.494 | 0.000 | 0.000 |
| AS94_09920 | 3-hydroxyacyl-CoA dehydrogenase                            | 0.879 | 0.001 | 0.001 |
| AS94_09925 | glutaryl-CoA dehydrogenase                                 | 1.155 | 0.003 | 0.006 |
| AS94_09930 | long-chain fatty acid--CoA ligase                          | 1.533 | 0.000 | 0.000 |
| AS94_09935 | coenzyme A transferase                                     | 1.762 | 0.000 | 0.000 |
| AS94_09955 | NmrA family protein                                        | 2.177 | 0.000 | 0.000 |
| AS94_09960 | DeoR family transcriptional regulator                      | 1.806 | 0.000 | 0.000 |
| AS94_09985 | lactate dehydrogenase                                      | 0.788 | 0.000 | 0.000 |
| AS94_09995 | inosine-uridine preferring nucleoside<br>hydrolase         | 0.623 | 0.002 | 0.004 |
| AS94_10035 | 2-C-methyl-D-erythritol 4-phosphate<br>cytidyltransferase  | 0.982 | 0.000 | 0.000 |
| AS94_10040 | ribitol-5-phosphate dehydrogenase                          | 0.721 | 0.001 | 0.002 |
| AS94_10045 | teichoic acid biosynthesis protein                         | 0.748 | 0.000 | 0.000 |
| AS94_10050 | CDP-glycerol:glycerophosphate<br>glycerophosphotransferase | 0.775 | 0.000 | 0.000 |
| AS94_10125 | ribokinase                                                 | 2.808 | 0.000 | 0.000 |
| AS94_10130 | ribose pyranase                                            | 2.726 | 0.000 | 0.000 |
| AS94_10135 | ribose transporter RbsU                                    | 2.853 | 0.000 | 0.000 |
| AS94_10200 | virulence factor EsxA                                      | 0.390 | 0.001 | 0.002 |
| AS94_10205 | type VII secretion protein EsaA                            | 0.914 | 0.000 | 0.000 |
| AS94_10220 | type VII secretion protein EssB                            | 0.596 | 0.024 | 0.049 |
| AS94_10315 | hypothetical protein                                       | 0.745 | 0.000 | 0.001 |
| AS94_10325 | branched-chain amino acid transporter<br>II carrierprotein | 0.968 | 0.000 | 0.000 |
| AS94_10390 | histidine transporter                                      | 2.081 | 0.000 | 0.000 |
| AS94_10395 | lipase                                                     | 0.498 | 0.000 | 0.000 |

|            |                                                                       |       |       |       |
|------------|-----------------------------------------------------------------------|-------|-------|-------|
| AS94_10470 | sn-glycerol-3-phosphate transporter                                   | 1.821 | 0.000 | 0.000 |
| AS94_10555 | acetyl-CoA acetyltransferase                                          | 0.837 | 0.000 | 0.000 |
| AS94_10565 | 5-methyltetrahydropteroyltriglutamate--homocysteine methyltransferase | 0.852 | 0.000 | 0.000 |
| AS94_10570 | 5_10-methylenetetrahydrofolate reductase                              | 0.983 | 0.000 | 0.000 |
| AS94_10575 | cystathionine beta-lyase                                              | 0.840 | 0.013 | 0.028 |
| AS94_10580 | cystathionine gamma-synthase                                          | 0.782 | 0.015 | 0.032 |
| AS94_10600 | GTP-binding protein YchF                                              | 0.305 | 0.024 | 0.049 |
| AS94_10660 | peptidase                                                             | 1.829 | 0.000 | 0.000 |
| AS94_10670 | membrane protein                                                      | 0.941 | 0.000 | 0.000 |
| AS94_10725 | hypothetical protein                                                  | 0.541 | 0.000 | 0.000 |
| AS94_10785 | growth inhibitor PemK                                                 | 0.719 | 0.000 | 0.000 |
| AS94_10795 | hypothetical protein                                                  | 0.861 | 0.002 | 0.006 |
| AS94_10800 | hypothetical protein                                                  | 0.786 | 0.000 | 0.000 |
| AS94_10935 | cobalamin synthesis protein CobW                                      | 2.380 | 0.000 | 0.000 |
| AS94_10985 | methionine ABC transporter ATP-binding protein                        | 1.535 | 0.000 | 0.000 |
| AS94_11070 | acetyltransferase                                                     | 0.620 | 0.009 | 0.019 |
| AS94_11170 | 16S rRNA methyltransferase                                            | 0.540 | 0.000 | 0.001 |
| AS94_11175 | tRNA uridine 5-carboxymethylaminomethyl modification protein          | 0.569 | 0.000 | 0.000 |
| AS94_11180 | tRNA modification GTPase                                              | 0.481 | 0.000 | 0.001 |
| AS94_11185 | ribonuclease P                                                        | 0.873 | 0.000 | 0.001 |
| AS94_11190 | 50S ribosomal protein L34                                             | 0.924 | 0.000 | 0.000 |
| AS94_11195 | chromosome replication protein DnaA                                   | 0.548 | 0.000 | 0.000 |
| AS94_11200 | DNA polymerase III subunit beta                                       | 0.635 | 0.000 | 0.000 |
| AS94_11210 | recombinase F                                                         | 0.481 | 0.000 | 0.000 |
| AS94_11215 | DNA gyrase subunit B                                                  | 0.557 | 0.000 | 0.000 |
| AS94_11220 | DNA topoisomerase IV subunit A                                        | 0.725 | 0.000 | 0.000 |
| AS94_11230 | histidine ammonia-lyase                                               | 0.628 | 0.000 | 0.000 |

|            |                                                |       |       |       |
|------------|------------------------------------------------|-------|-------|-------|
| AS94_11235 | seryl-tRNA synthetase                          | 1.022 | 0.000 | 0.000 |
| AS94_11275 | adenylosuccinate synthetase                    | 2.591 | 0.000 | 0.000 |
| AS94_11320 | 50S rRNA methyltransferase                     | 0.509 | 0.001 | 0.002 |
| AS94_11355 | penicillin-binding protein                     | 0.635 | 0.000 | 0.000 |
| AS94_11360 | methicillin resistance protein                 | 0.415 | 0.006 | 0.014 |
| AS94_11365 | hypothetical protein                           | 0.851 | 0.009 | 0.019 |
| AS94_11430 | hydrolase                                      | 2.561 | 0.000 | 0.000 |
| AS94_11470 | UDP-glucose 4-epimerase                        | 0.795 | 0.000 | 0.000 |
| AS94_11485 | 2-amino-3-ketobutyrate CoA ligase              | 0.544 | 0.000 | 0.000 |
| AS94_11515 | 50S ribosomal protein L7                       | 0.294 | 0.016 | 0.034 |
| AS94_11530 | 16S rRNA methyltransferase                     | 0.767 | 0.000 | 0.000 |
| AS94_11535 | 50S ribosomal protein L7/L12                   | 0.976 | 0.000 | 0.000 |
| AS94_11540 | 50S ribosomal protein L10                      | 1.082 | 0.000 | 0.000 |
| AS94_11545 | 50S ribosomal protein L1                       | 1.176 | 0.000 | 0.000 |
| AS94_11550 | 50S ribosomal protein L11                      | 0.711 | 0.000 | 0.000 |
| AS94_11575 | hypothetical protein                           | 0.417 | 0.015 | 0.031 |
| AS94_11610 | DNA repair protein RadA                        | 0.355 | 0.005 | 0.012 |
| AS94_11615 | ATP-dependent Clp protease ATP-binding protein | 0.396 | 0.000 | 0.000 |
| AS94_11665 | DNA damage-inducible protein DinB              | 0.614 | 0.000 | 0.001 |
| AS94_11680 | lactonase                                      | 0.993 | 0.000 | 0.000 |
| AS94_11740 | lipase                                         | 1.297 | 0.000 | 0.000 |
| AS94_11765 | transcriptional regulator                      | 0.602 | 0.000 | 0.000 |
| AS94_11815 | hypothetical protein                           | 0.695 | 0.004 | 0.009 |
| AS94_11825 | flavin reductase                               | 0.795 | 0.001 | 0.002 |
| AS94_11855 | preprotein translocase subunit SecA            | 0.320 | 0.012 | 0.027 |
| AS94_11870 | surface anchored protein                       | 0.933 | 0.000 | 0.000 |
| AS94_11875 | isochorismatase hydrolase                      | 0.341 | 0.005 | 0.012 |
| AS94_11880 | N-acetylmuramoyl-L-alanine amidase             | 0.521 | 0.000 | 0.000 |
| AS94_11940 | carbamate kinase                               | 0.510 | 0.000 | 0.001 |
| AS94_11945 | Crp/Fnr family transcriptional regulator       | 0.580 | 0.000 | 0.000 |

|            |                                                |       |       |       |
|------------|------------------------------------------------|-------|-------|-------|
| AS94_11985 | multidrug ABC transporter ATP-binding protein  | 0.925 | 0.000 | 0.000 |
| AS94_11990 | hypothetical protein                           | 0.695 | 0.000 | 0.000 |
| AS94_12020 | RecX family transcriptional regulator          | 0.925 | 0.000 | 0.000 |
| AS94_12025 | glycosyltransferase                            | 2.944 | 0.000 | 0.000 |
| AS94_12030 | general stress protein                         | 0.703 | 0.000 | 0.000 |
| AS94_12035 | hypothetical protein                           | 0.749 | 0.015 | 0.032 |
| AS94_12400 | protein tyrosine phosphatase                   | 0.394 | 0.001 | 0.004 |
| AS94_12410 | ribonuclease BN                                | 1.228 | 0.000 | 0.000 |
| AS94_12415 | LuxR family transcriptional regulator          | 3.187 | 0.000 | 0.000 |
| AS94_12420 | sensor histidine kinase                        | 3.380 | 0.000 | 0.000 |
| AS94_12425 | transporter                                    | 3.431 | 0.000 | 0.000 |
| AS94_12430 | hypothetical protein                           | 3.841 | 0.000 | 0.000 |
| AS94_12460 | glutamine amidotransferase                     | 0.539 | 0.000 | 0.000 |
| AS94_12465 | UDP-N-acetylmuramate--alanine ligase           | 0.705 | 0.000 | 0.000 |
| AS94_12475 | DNA polymerase III subunit epsilon             | 0.380 | 0.009 | 0.021 |
| AS94_12490 | RNA methyltransferase                          | 0.594 | 0.000 | 0.000 |
| AS94_12540 | hypothetical protein                           | 0.527 | 0.002 | 0.005 |
| AS94_12545 | adenylosuccinate lyase                         | 0.810 | 0.000 | 0.000 |
| AS94_12550 | cysteine protease                              | 1.797 | 0.000 | 0.000 |
| AS94_12555 | staphostatin A                                 | 1.108 | 0.001 | 0.004 |
| AS94_12590 | C4-dicarboxylate ABC transporter               | 0.379 | 0.006 | 0.014 |
| AS94_12630 | beta-lactamase                                 | 0.440 | 0.017 | 0.036 |
| AS94_12700 | membrane protein                               | 1.446 | 0.000 | 0.000 |
| AS94_12705 | antibiotic ABC transporter ATP-binding protein | 1.061 | 0.000 | 0.000 |
| AS94_12710 | membrane protein                               | 1.386 | 0.000 | 0.001 |
| AS94_12715 | sodium ABC transporter ATP-binding protein     | 1.491 | 0.000 | 0.000 |
| AS94_12720 | GntR family transcriptional regulator          | 1.459 | 0.000 | 0.000 |
| AS94_12755 | complement inhibitor                           | 0.994 | 0.000 | 0.000 |
| AS94_12765 | peptidoglycan hydrolase                        | 0.700 | 0.000 | 0.000 |
| AS94_12850 | molecular chaperone GroES                      | 0.653 | 0.000 | 0.000 |

|            |              |                                                    |        |       |       |
|------------|--------------|----------------------------------------------------|--------|-------|-------|
| AS94_12870 |              | hydrolase                                          | 0.334  | 0.016 | 0.035 |
| AS94_12935 |              | ABC transporter ATP-binding protein                | 0.476  | 0.002 | 0.006 |
| AS94_12970 |              | dihydroxy-acid dehydratase                         | 1.657  | 0.000 | 0.000 |
| AS94_12975 |              | acetolactate synthase                              | 1.006  | 0.000 | 0.000 |
| AS94_13490 |              | peptidyl-prolyl cis-trans isomerase                | 2.346  | 0.000 | 0.000 |
| AS94_13500 |              | DNA double-strand break repair Rad50<br>ATPase     | 0.307  | 0.003 | 0.007 |
| AS94_13515 |              | membrane protein                                   | 0.579  | 0.002 | 0.005 |
| AS94_13520 |              | Cro/C1 family transcriptional regulator            | 0.658  | 0.000 | 0.000 |
| AS94_13575 |              | amino acid ABC transporter ATP-<br>binding protein | 4.177  | 0.000 | 0.000 |
| AS94_13580 |              | glutamate ABC transporter permease                 | 4.391  | 0.000 | 0.000 |
| AS94_12040 |              | hypothetical protein                               | 8.459  | 0.000 | 0.000 |
| AS94_12045 |              | XRE family transcriptional regulator               | 12.889 | 0.000 | 0.000 |
| AS94_12050 |              | hypothetical protein                               | 11.224 | 0.000 | 0.000 |
| AS94_12055 |              | autolysin                                          | 10.844 | 0.000 | 0.000 |
| AS94_12060 |              | holin                                              | 8.647  | 0.000 | 0.000 |
| AS94_12065 |              | hypothetical protein                               | 9.207  | 0.000 | 0.000 |
| AS94_12070 |              | tail protein                                       | 11.976 | 0.000 | 0.000 |
| AS94_12075 |              | cell wall hydrolase                                | 12.788 | 0.000 | 0.000 |
| AS94_12080 |              | hypothetical protein                               | 9.512  | 0.000 | 0.000 |
| AS94_12090 |              | hypothetical protein                               | 8.652  | 0.000 | 0.000 |
| AS94_12095 |              | hypothetical protein                               | 12.193 | 0.000 | 0.000 |
| AS94_12100 | $\phi$ SA169 | minor structural protein                           | 12.567 | 0.000 | 0.000 |
| AS94_12105 |              | peptidase                                          | 12.720 | 0.000 | 0.000 |
| AS94_12110 |              | phage tail protein                                 | 11.456 | 0.000 | 0.000 |
| AS94_12115 |              | membrane protein                                   | 13.916 | 0.000 | 0.000 |
| AS94_12120 |              | phi 11                                             | 9.902  | 0.000 | 0.000 |
| AS94_12125 |              | hypothetical protein                               | 10.462 | 0.000 | 0.000 |
| AS94_12130 |              | tail protein                                       | 12.239 | 0.000 | 0.000 |
| AS94_12135 |              | phi 11                                             | 9.806  | 0.000 | 0.000 |
| AS94_12140 |              | hypothetical protein                               | 9.238  | 0.000 | 0.000 |
| AS94_12145 |              | hypothetical protein                               | 8.869  | 0.000 | 0.000 |
| AS94_12150 |              | phage head-tail adapter protein                    | 10.259 | 0.000 | 0.000 |

|            |                                              |        |       |       |
|------------|----------------------------------------------|--------|-------|-------|
| AS94_12155 | phi 11                                       | 8.348  | 0.000 | 0.000 |
| AS94_12160 | hypothetical protein                         | 12.909 | 0.000 | 0.000 |
| AS94_12165 | phage capsid protein                         | 13.409 | 0.000 | 0.000 |
| AS94_12170 | hypothetical protein                         | 7.512  | 0.000 | 0.000 |
| AS94_12175 | phage head morphogenesis protein             | 12.222 | 0.000 | 0.000 |
| AS94_12180 | phage portal protein                         | 12.555 | 0.000 | 0.000 |
| AS94_12185 | hypothetical protein                         | 12.014 | 0.000 | 0.000 |
| AS94_12190 | terminase                                    | 11.070 | 0.000 | 0.000 |
| AS94_12195 | transcriptional regulator                    | 9.179  | 0.000 | 0.000 |
| AS94_12210 | hypothetical protein                         | 7.003  | 0.000 | 0.000 |
| AS94_12215 | hypothetical protein                         | 5.651  | 0.001 | 0.002 |
| AS94_12220 | dUTP pyrophosphatase                         | 9.617  | 0.000 | 0.000 |
| AS94_12230 | hypothetical protein                         | 6.411  | 0.000 | 0.000 |
| AS94_12240 | hypothetical protein                         | 8.519  | 0.000 | 0.000 |
| AS94_12250 | hypothetical protein                         | 5.258  | 0.022 | 0.045 |
| AS94_12270 | DNA N-6-adenine-methyltransferase            | 6.555  | 0.000 | 0.000 |
| AS94_12295 | hypothetical protein                         | 9.802  | 0.000 | 0.000 |
| AS94_12320 | hypothetical protein                         | 5.636  | 0.002 | 0.005 |
| AS94_12325 | hypothetical protein                         | 10.255 | 0.000 | 0.000 |
| AS94_12330 | hypothetical protein                         | 6.051  | 0.000 | 0.001 |
| AS94_12340 | hypothetical protein                         | 7.580  | 0.000 | 0.000 |
| AS94_12345 | BRO-like protein                             | 12.337 | 0.000 | 0.000 |
| AS94_12350 | hypothetical protein                         | 10.705 | 0.000 | 0.000 |
| AS94_12355 | XRE family transcriptional regulator         | 8.504  | 0.000 | 0.000 |
| AS94_12360 | transcriptional regulator                    | 12.464 | 0.000 | 0.000 |
| AS94_12365 | hypothetical protein                         | 8.895  | 0.000 | 0.000 |
| AS94_12370 | repressor                                    | 13.022 | 0.000 | 0.000 |
| AS94_12375 | integrase                                    | 10.916 | 0.000 | 0.000 |
| AS94_13265 | hypothetical protein                         | 4.162  | 0.000 | 0.000 |
| AS94_13290 | hypothetical protein                         | 8.740  | 0.000 | 0.000 |
| AS94_13295 | hypothetical protein                         | 5.378  | 0.011 | 0.025 |
| AS94_13305 | mutual prophage DNA replication protein DnaC | 0.938  | 0.000 | 0.001 |
| AS94_13310 | replication protein                          | 10.627 | 0.000 | 0.000 |
| AS94_13315 | hypothetical protein                         | 10.070 | 0.000 | 0.000 |

|            |           |       |       |       |
|------------|-----------|-------|-------|-------|
| AS94_13395 | integrase | 0.983 | 0.000 | 0.000 |
|------------|-----------|-------|-------|-------|

---
